# Supplementary material
Source: publisher figshare collection journal article supplement (https://karger.figshare.com/articles/dataset/_/5123515)
Supplement: Supplementary file 1 [file 1]

**Supplemental table 1: Primers used for real-time RT-PCR validation**

| Gene ID | NCBI accession number | Forward (5'-3')       | Reverse (5'-3')             | Annealing temperature (°C) | Amplicon length (bp) |
|---------|-----------------------|-----------------------|-----------------------------|----------------------------|----------------------|
| Aatk    | NM_001168703.1        | GGGCCCCGATACTCTGCTCTC | CAGGGCCAAAGTTGGGTTTCG       | 60                         | 115                  |
| Aif1    | NM_017196.3           | CCACCTAAGGCCACCAGCGT  | AGTGCTTGTTGATCCCATCCAACC    | 60                         | 121                  |
| C1qa    | NM_001008515.1        | CGGAGGCAGGAACATCATGGA | AATTCCTGCAACCCCGTCCT        | 58                         | 130                  |
| C4b     | NM_031504.3           | TCAGGGTTACAGCCTCCGAA  | TGGTTTGTCTGCACAGCCTCTA      | 58                         | 111                  |
| Cd74    | NM_013069.2           | CAAACCTGTGAGCCCCGATGC | ACGGGTCCAGACTTCGTAAGC       | 60                         | 153                  |
| Dnajb1  | NM_001108441.1        | CCAAGGAAGGGGACCAGACC  | CCACAGAGAGCCTCCCGAAG        | 60                         | 139                  |
| Fos     | NM_022197.2           | AGTAGAGCAGCTATCTCCTG  | GGGCTGCCAAAATAAACTCC        | 56                         | 215                  |
| Gapdh   | NM_017008.3           | AGGGCTGCCTTCTCTTGAC   | TGGGTAGAATCATACTGGAACATGTAG | 58                         | 101                  |
| Ghrhr   | NM_012850             | CTGCTGTCTTCCAGGGTGAT  | TAGGAGATGTGGAGGCCAAC        | 58                         | 159                  |
| Glr1    | NM_022278.1           | TCCTCAGTCAACTGCCTTTC  | TCCGCCTATGCAGTCTTTAC        | 58                         | 152                  |
| Gpx2    | NM_183403.2           | TCGACATCAGGAGAACTGT   | GTAGGGCAGCTTGCTTTCA         | 60                         | 164                  |
| HLA-dra | NM_001008847.2        | GCGGAAGCACTGGGAGTTTG  | CGACGACGATGCCTACCAGA        | 58                         | 104                  |
| Hspb7   | NM_031607.1           | ATCTCAGCCTAGGCCCCAGT  | ATGTTGCTCCCCAAGTGGCT        | 60                         | 167                  |
| Igfbp3  | NM_012588.1           | CGTCTCCTGGAAACACCACT  | AGTTCTGGGTGTCTGTGC          | 60                         | 204                  |
| Jun     | NM_021835.3           | ATCGACATGGAGTCTCAGGA  | GTTTAAGCTGTGCCACCTGT        | 58                         | 196                  |
| Nol3    | NM_053516.2           | GGAACACTGCGCTGTGCCC   | GCCCAGGACATGTGGTCCCT        | 60                         | 158                  |
| Nupr1   | NM_053611.1           | TATGTCGTCGGTGAGGTCG   | TCCATTGCTGGGTGTGGTGT        | 60                         | 188                  |
| Reg3b   | S77413                | TCCTGCCTGATGCTCTTATC  | GCCAGTTCTGCATCAAACCA        | 58                         | 155                  |
| Sstr3   | NM_133522.1           | TCTCTGGGTACCTGGTGGT   | AGACGACACATGAGAGAGCC        | 60                         | 212                  |
| Tradd   | NM_001100480.1        | AGCTCATAGTGAACCGGCCA  | ATCCCTCAGTGCTCGACAGC        | 58                         | 119                  |
| Xpa     | NM_001106656.1        | TTCATGAACCAGGGCCCGTCA | AGCATCTCTGCAGCTATCGCATG     | 58                         | 125                  |

**Supplemental table 2: List of genes regulated by aging in the anterior pituitary**

| Gene Symbol         | Gene Title                                                          | RefSeq Transcript ID                                         | Fold change | Gene Ontology Biological Process                                     |
|---------------------|---------------------------------------------------------------------|--------------------------------------------------------------|-------------|----------------------------------------------------------------------|
| <b>Up-regulated</b> |                                                                     |                                                              |             |                                                                      |
| <i>Reg3b</i>        | regenerating islet-derived 3 beta                                   | NM_053289                                                    | <b>5,77</b> | acute-phase response                                                 |
| <i>Igha</i>         | immunoglobulin heavy chain, alpha                                   | ---                                                          | <b>5,41</b> |                                                                      |
| <i>Calcr</i>        | calcitonin receptor                                                 | NM_001034015 /// NM_053816                                   | <b>4,91</b> | signal transduction                                                  |
| <i>IgG-2a</i>       | gamma-2a immunoglobulin heavy chain                                 | XM_002726773                                                 | <b>3,88</b> |                                                                      |
| <i>C4-2 /// C4b</i> | complement component 4, gene 2 /// complement component 4B          | NM_001002805 /// NM_031504                                   | <b>3,51</b> | inflammatory response                                                |
| <i>Pcsk2</i>        | proprotein convertase subtilisin/kexin type 2                       | NM_012746                                                    | <b>3,42</b> | proteolysis                                                          |
| <i>Slc6a15</i>      | solute carrier family 6 (neutral amino acid transporter), member 15 | NM_172321                                                    | <b>3,33</b> | transport                                                            |
| <i>Olfm3</i>        | olfactomedin 3                                                      | NM_145777                                                    | <b>3,32</b> | eye photoreceptor cell development                                   |
| <i>Esm1</i>         | endothelial cell-specific molecule 1                                | NM_022604                                                    | <b>3,28</b> | regulation of cell growth                                            |
| <i>Krt25</i>        | keratin 25                                                          | NM_001008822                                                 | <b>3,22</b> | hair follicle morphogenesis                                          |
| <i>Apod</i>         | apolipoprotein D                                                    | NM_012777                                                    | <b>3,19</b> | transport                                                            |
| <i>Sez6</i>         | seizure related 6 homolog (mouse)                                   | NM_001105754 /// XM_001080832 /// XM_239260                  | <b>2,96</b> |                                                                      |
| <i>Igfbp3</i>       | insulin-like growth factor binding protein 3                        | NM_012588                                                    | <b>2,89</b> | regulation of cell growth                                            |
| <i>Reg3a</i>        | regenerating islet-derived 3 alpha                                  | NM_001145846 /// NM_172077                                   | <b>2,68</b> | acute-phase response                                                 |
| <i>Id3</i>          | inhibitor of DNA binding 3                                          | NM_013058                                                    | <b>2,67</b> | negative regulation of transcription from RNA polymerase II promoter |
| <i>Klk1b3</i>       | kallikrein 1-related peptidase b3                                   | NM_031523                                                    | <b>2,64</b> | proteolysis                                                          |
| <i>Tagln3</i>       | transgelin 3                                                        | NM_001035236 /// NM_031676                                   | <b>2,56</b> | muscle organ development                                             |
| <i>Gpx2</i>         | glutathione peroxidase 2                                            | NM_183403                                                    | <b>2,56</b> | temperature homeostasis                                              |
| <i>Akr1c19</i>      | aldo-keto reductase family 1, member C19                            | NM_001100576                                                 | <b>2,50</b> | oxidation reduction                                                  |
| <i>Syn2</i>         | synapsin II                                                         | NM_001034020 /// NM_019159                                   | <b>2,44</b> | neurotransmitter secretion                                           |
| <i>Cldn7</i>        | claudin 7                                                           | NM_031702                                                    | <b>2,40</b> | calcium-independent cell-cell adhesion                               |
| <i>C1qa</i>         | complement component 1, q subcomponent, A chain                     | NM_001008515                                                 | <b>2,37</b> | complement activation, classical pathway                             |
| <i>Nol3</i>         | nucleolar protein 3 (apoptosis repressor with CARD domain)          | NM_053516                                                    | <b>2,36</b> | response to hypoxia                                                  |
| <i>Igf1</i>         | insulin-like growth factor 1                                        | NM_001082477 /// NM_001082478 /// NM_001082479 /// NM_178866 | <b>2,32</b> | osteoblast differentiation                                           |
| <i>Cpxm2</i>        | carboxypeptidase X (M14 family), member 2                           | NM_001106306                                                 | <b>2,29</b> | proteolysis                                                          |
| <i>Rasd1</i>        | RAS, dexamethasone-induced 1                                        | XM_001077321 /// XM_340809                                   | <b>2,28</b> | signal transduction                                                  |
| <i>Serping1</i>     | serine (or cysteine) peptidase inhibitor, clade G, member 1         | NM_199093                                                    | <b>2,28</b> | negative regulation of complement activation, lectin pathway         |
| <i>Trhr</i>         | thyrotropin releasing hormone receptor                              | NM_013047                                                    | <b>2,26</b> | signal transduction                                                  |
| <i>Ascl1</i>        | achaete-scute complex homolog 1 (Drosophila)                        | NM_022384                                                    | <b>2,23</b> | neuron migration                                                     |
| <i>Lix1</i>         | Lix1 homolog (chicken)                                              | NM_001106214                                                 | <b>2,22</b> |                                                                      |
| <i>Ngb</i>          | neuroglobin                                                         | NM_033359                                                    | <b>2,21</b> | transport                                                            |
| <i>Gpnmb</i>        | glycoprotein (transmembrane) nmb                                    | NM_133298                                                    | <b>2,20</b> | osteoblast differentiation                                           |
| <i>Snca</i>         | synuclein, beta                                                     | NM_080777                                                    | <b>2,19</b> | dopamine metabolic process                                           |
| <i>Fmo5</i>         | flavin containing monooxygenase 5                                   | NM_144739                                                    | <b>2,19</b> | oxidation reduction                                                  |
| <i>Rgs5</i>         | regulator of G-protein signaling 5                                  | NM_019341                                                    | <b>2,16</b> | signal transduction                                                  |

|                 |                                                                                  |                                                                               |             |                                                                       |
|-----------------|----------------------------------------------------------------------------------|-------------------------------------------------------------------------------|-------------|-----------------------------------------------------------------------|
| <i>Lrrc4c</i>   | leucine rich repeat containing 4C                                                | NM_001107753                                                                  | <b>2,15</b> | regulation of axonogenesis                                            |
| <i>C1qc</i>     | complement component 1, q subcomponent, C chain                                  | NM_001008524                                                                  | <b>2,14</b> | complement activation, classical pathway                              |
| <i>Xdh</i>      | xanthine dehydrogenase                                                           | NM_017154                                                                     | <b>2,12</b> | lactation                                                             |
| <i>Nefh</i>     | neurofilament, heavy polypeptide                                                 | NM_012607                                                                     | <b>2,11</b> | microtubule cytoskeleton organization                                 |
| <i>Nol4</i>     | nucleolar protein 4                                                              | NM_001107401                                                                  | <b>2,11</b> |                                                                       |
| <i>Tmem229a</i> | transmembrane protein 229A                                                       | NM_001109480                                                                  | <b>2,10</b> |                                                                       |
| <i>Gfra3</i>    | GDNF family receptor alpha 3                                                     | NM_053398                                                                     | <b>2,09</b> | neuron migration                                                      |
| <i>Gucy1a3</i>  | guanylate cyclase 1, soluble, alpha 3                                            | NM_017090                                                                     | <b>2,08</b> | cGMP biosynthetic process                                             |
| <i>Lgals1</i>   | lectin, galactoside-binding, soluble, 1                                          | NM_019904                                                                     | <b>2,06</b> | negative regulation of cell-substrate adhesion                        |
| <i>Cys1</i>     | cystin 1                                                                         | NM_001109597                                                                  | <b>2,01</b> |                                                                       |
| <i>Nt5dc1</i>   | 5'-nucleotidase domain containing 1                                              | NM_001106393                                                                  | <b>1,99</b> |                                                                       |
| <i>Fcgr2a</i>   | Fc fragment of IgG, low affinity IIa, receptor (CD32) /// Fc gamma receptor II b | NM_001135992 /// NM_053843                                                    | <b>1,99</b> | antibody-dependent cellular cytotoxicity                              |
| <i>Htra1</i>    | HtrA serine peptidase 1                                                          | NM_031721                                                                     | <b>1,97</b> | regulation of cell growth                                             |
| <i>Apoe</i>     | apolipoprotein E                                                                 | NM_138828                                                                     | <b>1,95</b> | negative regulation of endothelial cell proliferation                 |
| <i>Suds3</i>    | Suppressor of defective silencing 3 homolog (S. cerevisiae)                      | XM_001080131 /// XM_341092                                                    | <b>1,95</b> | negative regulation of transcription                                  |
| <i>Pcdh19</i>   | protocadherin 19                                                                 | NM_001169129                                                                  | <b>1,95</b> | cell adhesion                                                         |
| <i>Myo1b</i>    | myosin Ib                                                                        | NM_053986                                                                     | <b>1,93</b> | nervous system development                                            |
| <i>Rnf180</i>   | ring finger protein 180                                                          | NM_001134986                                                                  | <b>1,93</b> | positive regulation of proteasomal ubiquitin-dependent protein catabo |
| <i>Gabra1</i>   | gamma-aminobutyric acid (GABA) A receptor, alpha 1                               | NM_183326                                                                     | <b>1,93</b> | transport                                                             |
| <i>Ptp4a3</i>   | protein tyrosine phosphatase 4a3                                                 | NM_001114405                                                                  | <b>1,93</b> | protein dephosphorylation                                             |
| <i>Crtac1</i>   | cartilage acidic protein 1                                                       | NM_134401                                                                     | <b>1,92</b> |                                                                       |
| <i>Mtmr1</i>    | Myotubularin related protein 1                                                   | NM_001191725 /// XM_001059230 /// XM_228644                                   | <b>1,91</b> | dephosphorylation                                                     |
| <i>Gabrg2</i>   | gamma-aminobutyric acid (GABA) A receptor, gamma 2                               | NM_183327                                                                     | <b>1,91</b> | transport                                                             |
| <i>Rhobtb3</i>  | Rho-related BTB domain containing 3                                              | NM_001107645                                                                  | <b>1,90</b> | retrograde transport, endosome to Golgi                               |
| <i>Ccdc88b</i>  | coiled-coil domain containing 88B                                                | NM_001108517                                                                  | <b>1,90</b> | protein phosphorylation                                               |
| <i>Plekhhb1</i> | pleckstrin homology domain containing, family B (evectins) member 1              | NM_172033                                                                     | <b>1,89</b> | regulation of cell differentiation                                    |
| <i>Cdcp1</i>    | CUB domain containing protein 1                                                  | NM_001106869                                                                  | <b>1,87</b> |                                                                       |
| <i>Retsat</i>   | retinol saturase (all trans retinol 13,14 reductase)                             | NM_145084                                                                     | <b>1,87</b> | retinol metabolic process                                             |
| <i>Brunol5</i>  | bruno-like 5, RNA binding protein (Drosophila)                                   | NM_001135603                                                                  | <b>1,87</b> |                                                                       |
| <i>Efh1</i>     | EF-hand domain family, member D1                                                 | NM_001109310                                                                  | <b>1,86</b> | neuron projection development                                         |
| <i>Gria4</i>    | glutamate receptor, ionotropic, AMPA4                                            | NM_001113184 /// NM_001113185 /// NM_017263                                   | <b>1,86</b> | transport                                                             |
| <i>Myo1d</i>    | myosin ID                                                                        | NM_012983                                                                     | <b>1,84</b> | transport                                                             |
| <i>Lppr5</i>    | lipid phosphate phosphatase-related protein type 5                               | NM_001107720                                                                  | <b>1,84</b> |                                                                       |
| <i>Ahcyl2</i>   | adenosylhomocysteinase-like 2                                                    | NM_001173510 /// XM_001062287 /// XM_231564                                   | <b>1,84</b> | one-carbon metabolic process                                          |
| <i>Arsb</i>     | arylsulfatase B                                                                  | NM_033443                                                                     | <b>1,83</b> | autophagy                                                             |
| <i>Vegfa</i>    | vascular endothelial growth factor A                                             | NM_001110333 /// NM_001110334 /// NM_001110335 /// NM_001110336 /// NM_031836 | <b>1,82</b> | angiogenesis                                                          |
| <i>Adipoq</i>   | adiponectin, C1Q and collagen domain containing                                  | NM_144744                                                                     | <b>1,82</b> | response to hypoxia                                                   |
| <i>Agtr1b</i>   | angiotensin II receptor, type 1b                                                 | NM_031009                                                                     | <b>1,82</b> | blood vessel development                                              |

|                 |                                                                               |                                                                                  |             |                                                                       |
|-----------------|-------------------------------------------------------------------------------|----------------------------------------------------------------------------------|-------------|-----------------------------------------------------------------------|
| <i>Cdkn1c</i>   | cyclin-dependent kinase inhibitor 1C                                          | NM_001033757 /// NM_001033758 /// NM_182735                                      | <b>1,81</b> | negative regulation of transcription from RNA polymerase II promoter  |
| <i>Kitlg</i>    | KIT ligand                                                                    | NM_021843 /// NM_021844                                                          | <b>1,80</b> | ovarian follicle development                                          |
| <i>Gulp1</i>    | GULP, engulfment adaptor PTB domain containing 1                              | NM_001013171                                                                     | <b>1,79</b> | transport                                                             |
| <i>Atp2b3</i>   | ATPase, Ca++ transporting, plasma membrane 3                                  | NM_133288                                                                        | <b>1,79</b> | neural retina development                                             |
| <i>Cadps2</i>   | Ca++-dependent secretion activator 2                                          | XM_001060172 /// XM_002726328 /// XM_002726329 /// XM_002726330 /// XM_002726331 | <b>1,78</b> | positive regulation of exocytosis                                     |
| <i>Accn4</i>    | amiloride-sensitive cation channel 4, pituitary                               | NM_022234                                                                        | <b>1,77</b> | transport                                                             |
| <i>Khdrbs2</i>  | KH domain containing, RNA binding, signal transduction associated 2           | NM_133318                                                                        | <b>1,77</b> | transcription                                                         |
| <i>Aqp1</i>     | aquaporin 1                                                                   | NM_012778                                                                        | <b>1,77</b> | glomerular filtration                                                 |
| <i>Glrx1</i>    | glutaredoxin 1                                                                | NM_022278                                                                        | <b>1,77</b> | transport                                                             |
| <i>Sox4</i>     | SRY (sex determining region Y)-box 4                                          | XM_001068302 /// XM_344594                                                       | <b>1,77</b> | response to hypoxia                                                   |
| <i>Rimkb</i>    | ribosomal modification protein rimK-like family member B                      | XM_001060530 /// XM_342749                                                       | <b>1,76</b> | protein modification process                                          |
| <i>Plch2</i>    | Phospholipase C, eta 2                                                        | XM_001077247 /// XM_233728                                                       | <b>1,76</b> | lipid metabolic process                                               |
| <i>Ifitm1</i>   | interferon induced transmembrane protein 1                                    | NM_001106314                                                                     | <b>1,76</b> | response to biotic stimulus                                           |
| <i>Fcgrt</i>    | Fc fragment of IgG, receptor, transporter, alpha                              | NM_033351                                                                        | <b>1,75</b> | immune response                                                       |
| <i>Gpr162</i>   | G protein-coupled receptor 162                                                | NM_001108646                                                                     | <b>1,74</b> | G-protein coupled receptor protein signaling pathway                  |
| <i>Gabrd</i>    | gamma-aminobutyric acid (GABA) A receptor, delta                              | NM_017289                                                                        | <b>1,74</b> | transport                                                             |
| <i>Myh14</i>    | myosin, heavy chain 14                                                        | NM_001100690                                                                     | <b>1,73</b> | ATP catabolic process                                                 |
| <i>Dync1i1</i>  | dynein cytoplasmic 1 intermediate chain 1                                     | NM_019234                                                                        | <b>1,71</b> | transport                                                             |
| <i>Zbtb4</i>    | zinc finger and BTB domain containing 4                                       | XM_001079524 /// XM_220612                                                       | <b>1,71</b> |                                                                       |
| <i>Bend5</i>    | BEN domain containing 5                                                       | NM_001108672                                                                     | <b>1,71</b> |                                                                       |
| <i>Ssfa2</i>    | sperm specific antigen 2                                                      | NM_001107738                                                                     | <b>1,70</b> |                                                                       |
| <i>Ap1s2</i>    | adaptor-related protein complex 1, sigma 2 subunit                            | NM_001127531                                                                     | <b>1,69</b> | transport                                                             |
| <i>Pgcp</i>     | plasma glutamate carboxypeptidase                                             | NM_031640                                                                        | <b>1,68</b> | proteolysis                                                           |
| <i>Stmn2</i>    | stathmin-like 2                                                               | NM_053440                                                                        | <b>1,68</b> | negative regulation of microtubule depolymerization                   |
| <i>Igf2</i>     | insulin-like growth factor 2                                                  | NM_001190162 /// NM_001190163 /// NM_031511                                      | <b>1,68</b> | ossification                                                          |
| <i>Dgkb</i>     | diacylglycerol kinase, beta                                                   | NM_019304                                                                        | <b>1,68</b> | activation of protein kinase C activity by G-protein coupled receptor |
| <i>Ccdc30</i>   | coiled-coil domain containing 30                                              | XM_001073839 /// XM_342899                                                       | <b>1,68</b> | cell-matrix adhesion                                                  |
| <i>Fam151b</i>  | family with sequence similarity 151, member B                                 | NM_001134748                                                                     | <b>1,67</b> |                                                                       |
| <i>Cgnl1</i>    | cingulin-like 1                                                               | NM_001108164                                                                     | <b>1,67</b> |                                                                       |
| <i>Kcnq2</i>    | potassium voltage-gated channel, KQT-like subfamily, member 2                 | NM_133322                                                                        | <b>1,66</b> | transport                                                             |
| <i>C1qb</i>     | complement component 1, q subcomponent, B chain                               | NM_019262                                                                        | <b>1,66</b> | immune response                                                       |
| <i>Pah</i>      | phenylalanine hydroxylase                                                     | NM_012619                                                                        | <b>1,65</b> | L-phenylalanine metabolic process                                     |
| <i>Fos</i>      | FBJ osteosarcoma oncogene                                                     | NM_022197                                                                        | <b>1,65</b> | conditioned taste aversion                                            |
| <i>Cndp2</i>    | CNDP dipeptidase 2 (metallopeptidase M20 family)                              | NM_001010920                                                                     | <b>1,65</b> | proteolysis                                                           |
| <i>Sept_4</i>   | septin 4                                                                      | NM_001011893                                                                     | <b>1,64</b> | cell cycle                                                            |
| <i>Sh3kbp1</i>  | SH3-domain kinase binding protein 1                                           | NM_053360                                                                        | <b>1,64</b> | endocytosis                                                           |
| <i>Anxa4</i>    | annexin A4                                                                    | NM_024155                                                                        | <b>1,64</b> | exocytosis                                                            |
| <i>Lgals3bp</i> | lectin, galactoside-binding, soluble, 3 binding protein                       | NM_139096                                                                        | <b>1,64</b> | cell adhesion                                                         |
| <i>Cirbp</i>    | cold inducible RNA binding protein                                            | NM_031147                                                                        | <b>1,63</b> | response to stress                                                    |
| <i>Atp5s</i>    | ATP synthase, H+ transporting, mitochondrial F0 complex, subunit s (factor B) | NM_001007749                                                                     | <b>1,63</b> | ATP biosynthetic process                                              |

|               |                                                                              |                                                                 |      |                                            |
|---------------|------------------------------------------------------------------------------|-----------------------------------------------------------------|------|--------------------------------------------|
| <i>Hspb8</i>  | heat shock protein B8                                                        | NM_053612                                                       | 1,63 | response to stress                         |
| <i>Ubxn8</i>  | UBX domain protein 8                                                         | NM_001106086                                                    | 1,63 |                                            |
| <i>Palmd</i>  | palmdelphin                                                                  | NM_001025688                                                    | 1,62 | regulation of cell shape                   |
| <i>Ptpd</i>   | protein tyrosine phosphatase, receptor type, D                               | XM_001067936 /// XM_233065                                      | 1,62 | protein dephosphorylation                  |
| <i>Amn1</i>   | antagonist of mitotic exit network 1 homolog (S. cerevisiae)                 | NM_001008333                                                    | 1,62 |                                            |
| <i>Map2k6</i> | mitogen-activated protein kinase kinase 6                                    | NM_053703                                                       | 1,62 | MAPKKK cascade                             |
| <i>Rbbp9</i>  | retinoblastoma binding protein 9                                             | NM_019219                                                       | 1,62 | regulation of cell proliferation           |
| <i>Nup54</i>  | nucleoporin 54                                                               | NM_017361                                                       | 1,62 | protein targeting                          |
| <i>Pde1a</i>  | phosphodiesterase 1A, calmodulin-dependent                                   | NM_030871                                                       | 1,62 | cAMP catabolic process                     |
| <i>Gphn</i>   | gephyrin                                                                     | NM_022865                                                       | 1,62 | protein targeting                          |
| <i>F2r</i>    | coagulation factor II (thrombin) receptor                                    | NM_012950                                                       | 1,61 | activation of MAPKK activity               |
| <i>Ttyh1</i>  | tweety homolog 1 (Drosophila)                                                | NM_001106225                                                    | 1,61 | transport                                  |
| <i>Ccnd1</i>  | cyclin D1                                                                    | NM_171992                                                       | 1,61 | G1/S transition of mitotic cell cycle      |
| <i>Cmb1</i>   | carboxymethylenebutenolidase homolog (Pseudomonas)                           | NM_001008770                                                    | 1,61 |                                            |
| <i>Mlc1</i>   | megalencephalic leukoencephalopathy with subcortical cysts 1 homolog (human) | NM_001108105                                                    | 1,61 |                                            |
| <i>Ctss</i>   | cathepsin S                                                                  | NM_017320                                                       | 1,60 | proteolysis                                |
| <i>Ptgr1</i>  | prostaglandin reductase 1                                                    | NM_138863                                                       | 1,60 | metabolic process                          |
| <i>Flot1</i>  | flotillin 1                                                                  | NM_022701                                                       | 1,60 |                                            |
| <i>Cebpd</i>  | CCAAT/enhancer binding protein (C/EBP), delta                                | NM_013154                                                       | 1,60 | transcription                              |
| <i>Krt18</i>  | keratin 18                                                                   | NM_053976                                                       | 1,59 | apoptosis                                  |
| <i>Pdxp</i>   | pyridoxal (pyridoxine, vitamin B6) phosphatase                               | NM_001135819                                                    | 1,59 | metabolic process                          |
| <i>Ddx41</i>  | DEAD (Asp-Glu-Ala-Asp) box polypeptide 41                                    | NM_001108046                                                    | 1,59 |                                            |
| <i>Mmg2</i>   | membrane magnesium transporter 2                                             | NM_001013967                                                    | 1,59 | transport                                  |
| <i>Pex5l</i>  | peroxisomal biogenesis factor 5-like                                         | NM_173152                                                       | 1,59 | regulation of membrane potential           |
| <i>Tapbp</i>  | TAP binding protein                                                          | NM_033098                                                       | 1,58 | MHC class I protein complex assembly       |
| <i>Skap2</i>  | src kinase associated phosphoprotein 2                                       | NM_130413                                                       | 1,58 | negative regulation of cell proliferation  |
| <i>Tnr</i>    | tenascin R                                                                   | NM_013045                                                       | 1,58 | cell adhesion                              |
| <i>Npas2</i>  | neuronal PAS domain protein 2                                                | NM_001108214                                                    | 1,58 | regulation of transcription, DNA-dependent |
| <i>S100a6</i> | S100 calcium binding protein A6                                              | NM_053485                                                       | 1,58 |                                            |
| <i>Gpm6a</i>  | glycoprotein m6a                                                             | NM_178105                                                       | 1,58 |                                            |
| <i>Khl13</i>  | kelch-like 13 (Drosophila)                                                   | XM_001061200 /// XM_002727661 /// XM_002730180 /// XM_233297    | 1,57 | cytokinesis                                |
| <i>Soat1</i>  | sterol O-acyltransferase 1                                                   | NM_031118                                                       | 1,57 | lipid metabolic process                    |
| <i>Tgfb1</i>  | transforming growth factor, beta induced                                     | NM_053802                                                       | 1,57 | chondrocyte differentiation                |
| <i>Znf521</i> | zinc finger protein 521                                                      | NM_001107403                                                    | 1,57 |                                            |
| <i>Ppp4r2</i> | protein phosphatase 4, regulatory subunit 2                                  | NM_001106613                                                    | 1,57 |                                            |
| <i>Lrrc23</i> | leucine rich repeat containing 23                                            | NM_001013165                                                    | 1,57 |                                            |
| <i>Evl</i>    | Enah/Vasp-like                                                               | NM_024147                                                       | 1,57 | cellular component movement                |
| <i>Camta1</i> | similar to KIAA0833 protein                                                  | NM_001195559 /// NM_001195560 /// XM_002726619 /// XM_002729575 | 1,57 |                                            |
| <i>Pcbp3</i>  | poly(rC) binding protein 3                                                   | NM_001011945                                                    | 1,56 |                                            |
| <i>Zbtb22</i> | zinc finger and BTB domain containing 22                                     | NM_001009172                                                    | 1,56 |                                            |
| <i>Syne1</i>  | spectrin repeat containing, nuclear envelope 1                               | NM_001029909                                                    | 1,55 | Golgi organization                         |
| <i>Vipr2</i>  | vasoactive intestinal peptide receptor 2                                     | NM_017238                                                       | 1,55 | signal transduction                        |
| <i>Nosip</i>  | nitric oxide synthase interacting protein                                    | NM_001106260                                                    | 1,55 | negative regulation of catalytic activity  |
| <i>Fchsd2</i> | FCH and double SH3 domains 2                                                 | NM_001107539                                                    | 1,55 |                                            |

|                   |                                                                                |                                             |      |                                                                       |
|-------------------|--------------------------------------------------------------------------------|---------------------------------------------|------|-----------------------------------------------------------------------|
| <i>Kcnip4</i>     | Kv channel interacting protein 4                                               | NM_181365                                   | 1,55 | transport                                                             |
| <i>Pir</i>        | pirin (iron-binding nuclear protein)                                           | NM_001009474                                | 1,55 |                                                                       |
| <i>Xpa</i>        | xeroderma pigmentosum, complementation group A                                 | NM_001106656                                | 1,54 | nucleotide-excision repair, DNA damage removal                        |
| <i>Cdo1</i>       | cysteine dioxygenase, type I                                                   | NM_052809                                   | 1,54 | cysteine metabolic process                                            |
| <i>Rprm</i>       | represso, TP53 dependent G2 arrest mediator candidate                          | NM_001044276                                | 1,54 | cell cycle arrest                                                     |
| <i>Caly</i>       | calcyon neuron-specific vesicular protein                                      | NM_001190399 /// NM_138915                  | 1,54 | endocytosis                                                           |
| <i>Ehd3</i>       | EH-domain containing 3                                                         | NM_138890                                   | 1,54 |                                                                       |
| <i>Kcnd3</i>      | potassium voltage-gated channel, Shal-related subfamily, member 3              | NM_031739                                   | 1,54 | transport                                                             |
| <i>Rrm1</i>       | ribonucleotide reductase M1                                                    | NM_001013236                                | 1,53 | DNA replication                                                       |
| <i>Traf3ip2</i>   | Traf3 interacting protein 2                                                    | NM_001044248                                | 1,53 | B cell apoptosis                                                      |
| <i>Eid2b</i>      | EP300 interacting inhibitor of differentiation 2B                              | XM_002725600 /// XM_574407                  | 1,53 |                                                                       |
| <i>Id2</i>        | inhibitor of DNA binding 2                                                     | NM_013060                                   | 1,53 | negative regulation of transcription from RNA polymerase II promoter  |
| <i>Raph1</i>      | Ras association (RalGDS/AF-6) and pleckstrin homology domains 1                | NM_001108798                                | 1,53 | signal transduction                                                   |
| <i>Wfdc2</i>      | WAP four-disulfide core domain 2                                               | NM_173109                                   | 1,53 |                                                                       |
| <i>Tcf20</i>      | transcription factor 20                                                        | NM_001130574                                | 1,53 | positive regulation of gene-specific transcription from RNA polymeras |
| <i>Tspan8</i>     | tetraspanin 8                                                                  | NM_133526                                   | 1,53 | negative regulation of blood coagulation                              |
| <i>Tspo</i>       | translocator protein                                                           | NM_012515                                   | 1,53 | steroid biosynthetic process                                          |
| <i>Etv1</i>       | Ets variant 1                                                                  | NM_001108709 /// NM_001163156               | 1,53 | regulation of transcription, DNA-dependent                            |
| <i>Pcdhb9</i>     | protocadherin beta 9                                                           | NM_001109390                                | 1,53 | cell adhesion                                                         |
| <i>Hist2h2be</i>  | histone cluster 2, H2be                                                        | XM_001061909 /// XM_227459                  | 1,52 | nucleosome assembly                                                   |
| <i>Sorbs2</i>     | sorbin and SH3 domain containing 2                                             | NM_053770                                   | 1,52 |                                                                       |
| <i>Nfix</i>       | nuclear factor I/X (CCAAT-binding transcription factor)                        | NM_030866                                   | 1,52 | DNA replication                                                       |
| <i>Cpne5</i>      | copine V                                                                       | NM_001107616                                | 1,52 |                                                                       |
| <i>Tox3</i>       | TOX high mobility group box family member 3                                    | NM_001106171                                | 1,52 |                                                                       |
| <i>Zfhx4</i>      | zinc finger homeobox 4                                                         | NM_001191702 /// XM_001058915 /// XM_226964 | 1,52 | regulation of transcription, DNA-dependent                            |
| <i>Galm</i>       | galactose mutarotase (aldose 1-epimerase)                                      | NM_001007704                                | 1,52 | carbohydrate metabolic process                                        |
| <i>Rpa2</i>       | replication protein A2                                                         | NM_021582                                   | 1,52 | nucleotide-excision repair, DNA damage removal                        |
| <i>Klc3</i>       | kinesin light chain 3                                                          | NM_138520                                   | 1,52 | metabolic process                                                     |
| <i>Fam172a</i>    | family with sequence similarity 172, member A                                  | NM_001106401                                | 1,52 |                                                                       |
| <i>Csgalnact1</i> | chondroitin sulfate N-acetylgalactosaminyltransferase 1                        | NM_001107309                                | 1,51 | UDP-N-acetylgalactosamine metabolic process                           |
| <i>Slc12a5</i>    | solute carrier family 12 (potassium-chloride transporter), member 5            | NM_134363                                   | 1,51 | transport                                                             |
| <i>Gstz1</i>      | glutathione transferase zeta 1                                                 | NM_001109445                                | 1,51 | aromatic amino acid family metabolic process                          |
| <i>Chchd6</i>     | coiled-coil-helix-coiled-coil-helix domain containing 6                        | NM_001106608                                | 1,51 |                                                                       |
| <i>Pex7</i>       | peroxisomal biogenesis factor 7                                                | NM_001034147                                | 1,51 | neuron migration                                                      |
| <i>Fam117b</i>    | family with sequence similarity 117, member B                                  | NM_001108797                                | 1,50 |                                                                       |
| <i>Agtrap</i>     | angiotensin II receptor-associated protein                                     | NM_001007654                                | 1,50 | response to hypoxia                                                   |
| <i>Tipi</i>       | tissue factor pathway inhibitor (lipoprotein-associated coagulation inhibitor) | NM_001177321 /// NM_017200                  | 1,50 | blood coagulation                                                     |
| <i>Ppap2b</i>     | phosphatidic acid phosphatase type 2B                                          | NM_138905                                   | 1,50 | blood vessel development                                              |
| <i>Gpsm1</i>      | G-protein signaling modulator 1 (AGS3-like, C. elegans)                        | NM_001145469 /// NM_144745                  | 1,50 | signal transduction                                                   |

|                 |                                                                              |                                                |      |                                                                                             |
|-----------------|------------------------------------------------------------------------------|------------------------------------------------|------|---------------------------------------------------------------------------------------------|
| <i>Dpp6</i>     | dipeptidylpeptidase 6                                                        | NM_022850                                      | 1,50 | proteolysis                                                                                 |
| <i>Vangl1</i>   | vang-like 1 (van gogh, Drosophila)                                           | NM_001109584                                   | 1,49 | multicellular organismal development                                                        |
| <i>Rab34</i>    | RAB34, member RAS oncogene family                                            | NM_001012140                                   | 1,49 | GTP catabolic process                                                                       |
| <i>Ati1</i>     | atlastin GTPase 1                                                            | NM_001009831                                   | 1,49 | endoplasmic reticulum organization                                                          |
| <i>H2afj</i>    | H2A histone family, member J                                                 | NM_001109610                                   | 1,49 | nucleosome assembly                                                                         |
| <i>Capn1</i>    | calpain 1                                                                    | NM_019152                                      | 1,49 | proteolysis                                                                                 |
| <i>Fam110c</i>  | family with sequence similarity 110, member C                                | NM_001025051                                   | 1,49 |                                                                                             |
| <i>Srbd1</i>    | S1 RNA binding domain 1                                                      | XM_001059624 /// XM_237474                     | 1,49 | nucleobase, nucleoside, nucleotide and nucleic acid<br>metabolic process<br>DNA replication |
| <i>Rfc4</i>     | replication factor C (activator 1) 4                                         | NM_001105869                                   | 1,49 |                                                                                             |
| <i>Fam173a</i>  | family with sequence similarity 173, member A                                | NM_001127447                                   | 1,49 |                                                                                             |
| <i>Cd82</i>     | Cd82 molecule                                                                | NM_031797                                      | 1,49 |                                                                                             |
| <i>Med30</i>    | mediator complex subunit 30                                                  | NM_001130539                                   | 1,48 | transcription initiation from RNA polymerase II promoter                                    |
| <i>Pcgf6</i>    | polycomb group ring finger 6                                                 | NM_001013154                                   | 1,48 | transcription                                                                               |
| <i>Apbb1</i>    | amyloid beta (A4) precursor protein-binding, family B, member 1 (Fe65)       | NM_080478                                      | 1,48 | neuron migration                                                                            |
| <i>Dnlz</i>     | DNL-type zinc finger                                                         | NM_001130990 /// NR_024073                     | 1,48 |                                                                                             |
| <i>Jun</i>      | Jun oncogene                                                                 | NM_021835                                      | 1,48 | angiogenesis                                                                                |
| <i>Efcab4a</i>  | EF-hand calcium binding domain 4A                                            | NM_001127541                                   | 1,47 | store-operated calcium entry                                                                |
| <i>Pbxip1</i>   | pre-B-cell leukemia homeobox interacting protein 1                           | NM_001100976                                   | 1,47 |                                                                                             |
| <i>Cpt1a</i>    | carnitine palmitoyltransferase 1a, liver                                     | NM_031559                                      | 1,47 | long-chain fatty acid metabolic process                                                     |
| <i>Eef2k</i>    | eukaryotic elongation factor-2 kinase                                        | NM_012947                                      | 1,47 | protein phosphorylation                                                                     |
| <i>Ntan1</i>    | N-terminal asparagine amidase                                                | NM_001025124                                   | 1,47 | memory                                                                                      |
| <i>Bat5</i>     | HLA-B associated transcript 5                                                | NM_212531                                      | 1,47 |                                                                                             |
| <i>Pde6d</i>    | phosphodiesterase 6D, cGMP-specific, rod, delta                              | NM_001108806                                   | 1,47 | visual perception                                                                           |
| <i>Cadm1</i>    | cell adhesion molecule 1                                                     | NM_001012201                                   | 1,47 | liver development                                                                           |
| <i>Ift81</i>    | intraflagellar transport 81 homolog (Chlamydomonas)                          | NM_199120                                      | 1,47 | multicellular organismal development                                                        |
| <i>Rtn1</i>     | reticulon 1                                                                  | NM_053865                                      | 1,47 | neuron differentiation                                                                      |
| <i>Kcnc2</i>    | potassium voltage gated channel, Shaw-related subfamily, member 2            | NM_139216 /// NM_139217                        | 1,47 | transport                                                                                   |
| <i>Tradd</i>    | TNFRSF1A-associated via death domain                                         | NM_001100480                                   | 1,47 | apoptosis                                                                                   |
| <i>Tmem106a</i> | transmembrane protein 106A                                                   | NM_001024967                                   | 1,47 |                                                                                             |
| <i>Cfb</i>      | complement factor B                                                          | NM_212466                                      | 1,46 | proteolysis                                                                                 |
| <i>Rab3c</i>    | RAB3C, member RAS oncogene family                                            | NM_133536                                      | 1,46 | transport                                                                                   |
| <i>Slc43a2</i>  | solute carrier family 43, member 2                                           | NM_001105812                                   | 1,46 | amino acid transmembrane transport                                                          |
| <i>Pcca</i>     | propionyl-coenzyme A carboxylase, alpha polypeptide                          | NM_019330                                      | 1,46 | metabolic process                                                                           |
| <i>Rsbn1</i>    | round spermatid basic protein 1                                              | NM_001191710 /// XM_001065582 ///<br>XM_227540 | 1,46 |                                                                                             |
| <i>Blcap</i>    | bladder cancer associated protein homolog (human)                            | NM_133582                                      | 1,46 | apoptosis                                                                                   |
| <i>Pm20d2</i>   | peptidase M20 domain containing 2                                            | NM_001107922                                   | 1,45 | metabolic process                                                                           |
| <i>Amigo2</i>   | adhesion molecule with Ig like domain 2                                      | NM_182816                                      | 1,45 | anti-apoptosis                                                                              |
| <i>Pcmt2</i>    | protein-L-isoaspartate (D-aspartate) O-methyltransferase domain containing 2 | NM_001107810                                   | 1,45 | protein modification process                                                                |
| <i>Rgs10</i>    | regulator of G-protein signaling 10                                          | NM_019337                                      | 1,45 | regulation of G-protein coupled receptor protein signaling pathway                          |
| <i>Rbmx</i>     | RNA binding motif protein, X-linked                                          | NM_001025663                                   | 1,45 | mRNA splice site selection                                                                  |
| <i>Ubxn6</i>    | UBX domain protein 6                                                         | NM_001108812                                   | 1,45 |                                                                                             |
| <i>Nsbp1</i>    | nucleosomal binding protein 1                                                | NM_001134706                                   | 1,45 | transcription                                                                               |
| <i>Prkcz</i>    | protein kinase C, zeta                                                       | NM_022507                                      | 1,45 | microtubule cytoskeleton organization                                                       |

|                 |                                                           |                                                |      |                                                                      |
|-----------------|-----------------------------------------------------------|------------------------------------------------|------|----------------------------------------------------------------------|
| <i>Calhm2</i>   | calcium homeostasis modulator 2                           | NM_001008306                                   | 1,45 |                                                                      |
| <i>Meis1</i>    | Meis homeobox 1                                           | NM_001134702                                   | 1,45 | angiogenesis                                                         |
| <i>Ccl11</i>    | chemokine (C-C motif) ligand 11                           | NM_019205                                      | 1,45 | positive regulation of endothelial cell proliferation                |
| <i>Ccdc90b</i>  | coiled-coil domain containing 90B                         | NM_001024885                                   | 1,44 |                                                                      |
| <i>Apc2</i>     | adenomatosis polyposis coli 2                             | NM_001106769                                   | 1,44 | Wnt receptor signaling pathway                                       |
| <i>Dnajc12</i>  | DnaJ (Hsp40) homolog, subfamily C, member 12              | NM_001034032                                   | 1,44 |                                                                      |
| <i>Klc4</i>     | kinesin light chain 4                                     | NM_001009601                                   | 1,44 |                                                                      |
| <i>Fcho2</i>    | FCH domain only 2                                         | NM_001191632 /// XM_002728999 /// XM_219503    | 1,44 |                                                                      |
| <i>Aldh16a1</i> | aldehyde dehydrogenase 16 family, member A1               | NM_001033706                                   | 1,44 | metabolic process                                                    |
| <i>St18</i>     | suppression of tumorigenicity 18                          | NM_153310                                      | 1,44 | negative regulation of transcription from RNA polymerase II promoter |
| <i>Ifitm3</i>   | interferon induced transmembrane protein 3                | NM_001136124                                   | 1,44 | negative regulation of cell proliferation                            |
| <i>Rsrc1</i>    | arginine/serine-rich coiled-coil 1                        | NM_001014172                                   | 1,44 | alternative nuclear mRNA splicing, via spliceosome                   |
| <i>Syngr2</i>   | synaptogyrin 2                                            | NM_053553                                      | 1,43 | protein targeting                                                    |
| <i>Gpr149</i>   | G protein-coupled receptor 149                            | NM_138891                                      | 1,43 | signal transduction                                                  |
| <i>Ncor1</i>    | Nuclear receptor co-repressor 1                           | XM_001077495 /// XM_577103                     | 1,43 | negative regulation of transcription from RNA polymerase II promoter |
| <i>Znf467</i>   | zinc finger protein 467                                   | NM_001024327                                   | 1,43 | transcription                                                        |
| <i>Odf2l</i>    | outer dense fiber of sperm tails 2-like                   | NM_001134708                                   | 1,43 |                                                                      |
| <i>Ebna1bp2</i> | EBNA1 binding protein 2                                   | NM_001008721                                   | 1,43 |                                                                      |
| <i>Mettl7a</i>  | methyltransferase like 7A                                 | NM_001037355                                   | 1,43 | metabolic process                                                    |
| <i>Cnnm3</i>    | cyclin M3                                                 | NM_001106901                                   | 1,43 |                                                                      |
| <i>Tspan33</i>  | tetraspanin 33                                            | NM_001109227                                   | 1,43 |                                                                      |
| <i>Tob1</i>     | transducer of ErbB-2.1                                    | NM_133317                                      | 1,43 | SMAD protein nuclear translocation                                   |
| <i>Ctnnbl1</i>  | catenin, beta like 1                                      | NM_001024870                                   | 1,43 | apoptosis                                                            |
| <i>Klc1</i>     | kinesin light chain 1                                     | NM_001081972 /// NM_001081973 /// NM_001081974 | 1,43 | axon cargo transport                                                 |
| <i>Suclg2</i>   | succinate-CoA ligase, GDP-forming, beta subunit           | NM_001100750                                   | 1,43 | tricarboxylic acid cycle                                             |
| <i>Cd151</i>    | CD151 molecule (Raph blood group)                         | NM_022523                                      | 1,43 | hemidesmosome assembly                                               |
| <i>Sh3bgrl3</i> | SH3 domain binding glutamic acid-rich protein-like 3      | NM_001106688                                   | 1,43 | cell redox homeostasis                                               |
| <i>Gcnt2</i>    | glucosaminyl (N-acetyl) transferase 2, I-branching enzyme | NM_001001511                                   | 1,42 | metabolic process                                                    |
| <i>Hes1</i>     | hairy and enhancer of split 1 (Drosophila)                | NM_024360                                      | 1,42 | negative regulation of transcription from RNA polymerase II promoter |
| <i>Ltbp3</i>    | latent transforming growth factor beta binding protein 3  | NM_001191561 /// XM_002725776 /// XM_002728859 | 1,42 | skeletal system development                                          |
| <i>L1cam</i>    | L1 cell adhesion molecule                                 | NM_017345                                      | 1,42 | cell adhesion                                                        |
| <i>Arse</i>     | arylsulfatase E (chondrodysplasia punctata 1)             | NM_001047885                                   | 1,42 | metabolic process                                                    |
| <i>Rassf6</i>   | Ras association (RalGDS/AF-6) domain family member 6      | NM_001025671                                   | 1,42 | apoptosis                                                            |
| <i>Aif1</i>     | allograft inflammatory factor 1                           | NM_017196                                      | 1,42 | positive regulation of protein phosphorylation                       |
| <i>Eif5a2</i>   | eukaryotic translation initiation factor 5A2              | NM_001100697 /// XM_001063995 /// XM_226974    | 1,42 | translational frameshifting                                          |
| <i>Ryr2</i>     | ryanodine receptor 2, cardiac                             | NM_001191043 /// NM_032078                     | 1,42 | detection of calcium ion                                             |
| <i>B3galnt1</i> | beta-1,3-N-acetylgalactosaminyltransferase 1              | NM_001013158                                   | 1,42 | protein glycosylation                                                |
| <i>Rundc3b</i>  | RUN domain containing 3B                                  | NM_001047116                                   | 1,42 |                                                                      |
| <i>Ctbp2</i>    | C-terminal binding protein 2                              | NM_053335                                      | 1,42 | transcription                                                        |
| <i>Gpx4</i>     | glutathione peroxidase 4                                  | NM_001039849 /// NM_017165                     | 1,42 | chromatin organization                                               |



|                |                                                                                  |                                             |      |                                                                      |
|----------------|----------------------------------------------------------------------------------|---------------------------------------------|------|----------------------------------------------------------------------|
| <i>Fbxl4</i>   | F-box and leucine-rich repeat protein 4                                          | NM_001107919                                | 1,41 |                                                                      |
| <i>Slco3a1</i> | Solute carrier organic anion transporter family, member 3a1                      | NM_177481                                   | 1,41 | transport                                                            |
| <i>Bcap29</i>  | B-cell receptor-associated protein 29                                            | NM_001006980                                | 1,41 | intracellular protein transport                                      |
| <i>Ctsz</i>    | cathepsin Z                                                                      | NM_183330                                   | 1,41 | proteolysis                                                          |
| <i>Exoc2</i>   | exocyst complex component 2                                                      | NM_134414                                   | 1,41 | transport                                                            |
| <i>Camk2d</i>  | calcium/calmodulin-dependent protein kinase II delta                             | NM_012519                                   | 1,41 | G1/S transition of mitotic cell cycle                                |
| <i>Msl1</i>    | male-specific lethal 1 homolog (Drosophila)                                      | NM_001107048                                | 1,41 |                                                                      |
| <i>St6gal1</i> | ST6 beta-galactosamide alpha-2,6-sialyltransferase 1                             | NM_001113344 /// NM_147205                  | 1,41 | protein glycosylation                                                |
| <i>Aarsd1</i>  | alanyl-tRNA synthetase domain containing 1                                       | NM_001034109                                | 1,41 | translation                                                          |
| <i>Nme4</i>    | non-metastatic cells 4, protein expressed in                                     | NM_001109478                                | 1,41 | GTP biosynthetic process                                             |
| <i>Lmo4</i>    | LIM domain only 4                                                                | NM_001009708                                | 1,41 | neural tube closure                                                  |
| <i>Cadps</i>   | Ca++-dependent secretion activator                                               | NM_013219                                   | 1,41 | transport                                                            |
| <i>Lman2l</i>  | lectin, mannose-binding 2-like                                                   | NM_001106900                                | 1,41 | protein transport                                                    |
| <i>Pnpla2</i>  | patatin-like phospholipase domain containing 2                                   | NM_001108509                                | 1,41 | lipid metabolic process                                              |
| <i>Nrxn1</i>   | neurexin 1                                                                       | NM_021767                                   | 1,41 | cell adhesion                                                        |
| <i>Lrg1</i>    | leucine-rich alpha-2-glycoprotein 1                                              | NM_001009717                                | 1,41 | brown fat cell differentiation                                       |
| <i>Znf292</i>  | zinc finger protein 292                                                          | NM_001008879                                | 1,40 |                                                                      |
| <i>Camk1</i>   | calcium/calmodulin-dependent protein kinase I                                    | NM_134468                                   | 1,40 | protein phosphorylation                                              |
| <i>Vwc2</i>    | von Willebrand factor C domain containing 2                                      | NM_001109312                                | 1,40 | positive regulation of cell-substrate adhesion                       |
| <i>Ublcp1</i>  | ubiquitin-like domain containing CTD phosphatase 1                               | NM_001014117                                | 1,40 |                                                                      |
| <i>Mlh3</i>    | mutL homolog 3 (E. coli)                                                         | NM_001108043                                | 1,40 | mismatch repair                                                      |
| <i>Gstp1</i>   | glutathione S-transferase pi 1                                                   | NM_012577                                   | 1,40 | glutathione metabolic process                                        |
| <i>Chrac1</i>  | chromatin accessibility complex 1                                                | NM_001134880                                | 1,39 |                                                                      |
| <i>Hopx</i>    | HOP homeobox                                                                     | NM_133621                                   | 1,39 | negative regulation of transcription from RNA polymerase II promoter |
| <i>Fancl</i>   | Fanconi anemia, complementation group L                                          | NM_001191684 /// XM_001064256 /// XM_223701 | 1,39 | gamete generation                                                    |
| <i>Nudt14</i>  | nudix (nucleoside diphosphate linked moiety X)-type motif 14                     | NM_001106760                                | 1,39 |                                                                      |
| <i>Gtpbp10</i> | GTP-binding protein 10 (putative)                                                | NM_001100815                                | 1,39 |                                                                      |
| <i>Dlg3</i>    | discs, large homolog 3 (Drosophila)                                              | NM_031639                                   | 1,39 |                                                                      |
| <i>Grk6</i>    | G protein-coupled receptor kinase 6                                              | NM_001112712 /// NM_001112713 /// NM_031657 | 1,39 | protein phosphorylation                                              |
| <i>Mdga2</i>   | MAM domain containing glycosylphosphatidylinositol anchor 2                      | NM_199269                                   | 1,39 | spinal cord motor neuron differentiation                             |
| <i>Pdpf</i>    | pancreatic progenitor cell differentiation and proliferation factor homolog (zeb | NM_001009316                                | 1,39 | multicellular organismal development                                 |
| <i>Fam60a</i>  | family with sequence similarity 60, member A                                     | NM_001134711 /// NM_001134712               | 1,39 |                                                                      |
| <i>Sec16a</i>  | SEC16 homolog A (S. cerevisiae)                                                  | XM_002726072 /// XM_002729145               | 1,39 | lipid metabolic process                                              |
| <i>Acn9</i>    | ACN9 homolog (S. cerevisiae)                                                     | NM_001047914                                | 1,39 |                                                                      |
| <i>Inpp1</i>   | inositol polyphosphate-1-phosphatase                                             | NM_001012131                                | 1,39 |                                                                      |
| <i>Six1</i>    | SIX homeobox 1                                                                   | NM_053759                                   | 1,39 | ureteric bud development                                             |
| <i>Zc4h2</i>   | zinc finger, C4H2 domain containing                                              | NM_001126374                                | 1,38 |                                                                      |
| <i>Hbxip</i>   | hepatitis B virus x interacting protein                                          | NM_001106462                                | 1,38 | anti-apoptosis                                                       |
| <i>Snn</i>     | stannin                                                                          | NM_001034083                                | 1,38 |                                                                      |
| <i>Amigo1</i>  | adhesion molecule with Ig like domain 1                                          | NM_206881                                   | 1,38 | cell adhesion                                                        |
| <i>Znrf2</i>   | zinc and ring finger 2                                                           | NM_001108628                                | 1,38 |                                                                      |
| <i>Cenpv</i>   | centromere protein V                                                             | XM_002724504 /// XM_577104                  | 1,38 | metabolic process                                                    |

|                |                                                                                  |                                                                                     |             |                                                                      |
|----------------|----------------------------------------------------------------------------------|-------------------------------------------------------------------------------------|-------------|----------------------------------------------------------------------|
| <i>Hmgb3</i>   | high mobility group box 3                                                        | NM_001173341 /// XM_001067329 ///<br>XM_002727293 /// XM_002730310 ///<br>XM_223440 | <b>1,38</b> | negative regulation of B cell differentiation                        |
| <i>Nap1l3</i>  | nucleosome assembly protein 1-like 3                                             | NM_133402                                                                           | <b>1,38</b> | nucleosome assembly                                                  |
| <i>Nubp1</i>   | nucleotide binding protein 1                                                     | NM_001009619                                                                        | <b>1,38</b> | cellular iron ion homeostasis                                        |
| <i>Lrsam1</i>  | leucine rich repeat and sterile alpha motif containing 1                         | NM_001107833                                                                        | <b>1,38</b> | protein polyubiquitination                                           |
| <i>Xrcc5</i>   | X-ray repair complementing defective repair in Chinese hamster cells 5           | NM_177419                                                                           | <b>1,38</b> | double-strand break repair                                           |
| <i>Ccdc124</i> | coiled-coil domain containing 124                                                | NM_001106071                                                                        | <b>1,37</b> |                                                                      |
| <i>Tmem206</i> | transmembrane protein 206                                                        | NM_001007679                                                                        | <b>1,37</b> |                                                                      |
| <i>Pcgf2</i>   | polycomb group ring finger 2                                                     | NM_001105836                                                                        | <b>1,37</b> | negative regulation of transcription from RNA polymerase II promoter |
| <i>Lrrc20</i>  | leucine rich repeat containing 20                                                | NM_001109171                                                                        | <b>1,37</b> |                                                                      |
| <i>Dazap2</i>  | DAZ associated protein 2                                                         | NM_001013107                                                                        | <b>1,37</b> |                                                                      |
| <i>Hmg20b</i>  | high mobility group 20 B                                                         | NM_001108731                                                                        | <b>1,37</b> |                                                                      |
| <i>Mrpl44</i>  | mitochondrial ribosomal protein L44                                              | NM_001031650                                                                        | <b>1,37</b> | RNA processing                                                       |
| <i>Sts</i>     | steroid sulfatase                                                                | NM_012661                                                                           | <b>1,37</b> | lipid metabolic process                                              |
| <i>Calmod3</i> | calmodulin 3                                                                     | NM_012518                                                                           | <b>1,37</b> | muscle contraction                                                   |
| <i>Mllt6</i>   | Myeloid/lymphoid or mixed-lineage leukemia (trithorax homolog, Drosophila); tran | XM_001081378 /// XM_239329                                                          | <b>1,37</b> |                                                                      |
| <i>Ier3</i>    | immediate early response 3                                                       | NM_212505                                                                           | <b>1,37</b> |                                                                      |
| <i>Ptgr2</i>   | prostaglandin reductase 2                                                        | NM_001015009                                                                        | <b>1,37</b> | metabolic process                                                    |
| <i>Aatk</i>    | apoptosis-associated tyrosine kinase                                             | NM_001168703                                                                        | <b>1,37</b> | apoptosis                                                            |
| <i>Abcc3</i>   | ATP-binding cassette, sub-family C (CFTR/MRP), member 3                          | NM_080581                                                                           | <b>1,37</b> | transport                                                            |
| <i>Jmjd5</i>   | jumonji domain containing 5                                                      | NM_001037196                                                                        | <b>1,37</b> | G2/M transition of mitotic cell cycle                                |
| <i>Mfng</i>    | MFNG O-fucosylpeptide 3-beta-N-acetylglucosaminyltransferase                     | NM_199110                                                                           | <b>1,37</b> | pattern specification process                                        |
| <i>Ccdc52</i>  | coiled-coil domain containing 52                                                 | NM_001008285                                                                        | <b>1,37</b> | cell cycle                                                           |
| <i>Cast</i>    | calpastatin                                                                      | NM_001033715 /// NM_001033716 ///<br>NM_053295                                      | <b>1,37</b> | myoblast fusion                                                      |
| <i>Lias</i>    | lipoic acid synthetase                                                           | NM_001012037                                                                        | <b>1,37</b> | inflammatory response                                                |
| <i>Ccl2</i>    | chemokine (C-C motif) ligand 2                                                   | NM_031530                                                                           | <b>1,37</b> | response to hypoxia                                                  |
| <i>Tubb3</i>   | tubulin, beta 3                                                                  | NM_139254                                                                           | <b>1,37</b> | neuron migration                                                     |
| <i>Plscr3</i>  | phospholipid scramblase 3                                                        | NM_001012139                                                                        | <b>1,36</b> | glucose homeostasis                                                  |
| <i>Fuca2</i>   | fucosidase, alpha-L- 2, plasma                                                   | NM_001004218                                                                        | <b>1,36</b> | carbohydrate metabolic process                                       |
| <i>Prkcq</i>   | protein kinase C, theta                                                          | XM_001064127 /// XM_341553                                                          | <b>1,36</b> | response to hypoxia                                                  |
| <i>Arrdc2</i>  | arrestin domain containing 2                                                     | NM_001107303                                                                        | <b>1,36</b> | signal transduction                                                  |
| <i>Grik2</i>   | glutamate receptor, ionotropic, kainate 2                                        | NM_019309                                                                           | <b>1,36</b> | behavioral fear response                                             |
| <i>Aip</i>     | aryl-hydrocarbon receptor-interacting protein                                    | NM_172327                                                                           | <b>1,36</b> | protein folding                                                      |
| <i>Pdzd4</i>   | PDZ domain containing 4                                                          | NM_001135836                                                                        | <b>1,36</b> |                                                                      |
| <i>Rab71</i>   | RAB7, member RAS oncogene family-like 1                                          | NM_133590                                                                           | <b>1,36</b> | transport                                                            |
| <i>Banf1</i>   | barrier to autointegration factor 1                                              | NM_053631                                                                           | <b>1,36</b> | DNA integration                                                      |
| <i>Epc2</i>    | enhancer of polycomb homolog 2 (Drosophila)                                      | NM_001108581                                                                        | <b>1,36</b> |                                                                      |
| <i>Atp6ap2</i> | ATPase, H+ transporting, lysosomal accessory protein 2                           | XM_001060853 /// XM_217592                                                          | <b>1,36</b> | angiotensin maturation                                               |
| <i>Nek7</i>    | NIMA (never in mitosis gene a)-related kinase 7                                  | NM_001108346                                                                        | <b>1,36</b> | protein phosphorylation                                              |
| <i>Acot2</i>   | Acyl-CoA thioesterase 2                                                          | NM_138907                                                                           | <b>1,36</b> | very long-chain fatty acid metabolic process                         |

|                            |                                                                                  |                                                                                     |      |                                                       |
|----------------------------|----------------------------------------------------------------------------------|-------------------------------------------------------------------------------------|------|-------------------------------------------------------|
| <i>Rnf123</i>              | ring finger protein 123                                                          | NM_001191580 /// XM_002727136 ///<br>XM_002729963                                   | 1,35 |                                                       |
| <i>Tmem147</i>             | transmembrane protein 147                                                        | NM_001038494                                                                        | 1,35 |                                                       |
| <i>Podxl2</i>              | podocalyxin-like 2                                                               | NM_001106607                                                                        | 1,35 |                                                       |
| <i>Manbal</i>              | mannosidase, beta A, lysosomal-like                                              | NM_001173380 /// XM_001067976 ///<br>XM_002726286 /// XM_002729245 ///<br>XM_575279 | 1,35 |                                                       |
| <i>Atp6v1e1</i>            | ATPase, H+ transporting, lysosomal V1 subunit E1                                 | NM_198745                                                                           | 1,35 | ATP catabolic process                                 |
| <i>Ankrd40</i>             | ankyrin repeat domain 40                                                         | NM_001134699                                                                        | 1,35 |                                                       |
| <i>Rab25</i>               | RAB25, member RAS oncogene family                                                | NM_001107687                                                                        | 1,35 | small GTPase mediated signal transduction             |
| <i>Nacc2</i>               | nucleus accumbens associated 2, BEN and BTB (POZ) domain containing              | NM_001100533                                                                        | 1,35 |                                                       |
| <i>Fbxo23</i>              | F-box only protein 23                                                            | NM_001013138                                                                        | 1,35 |                                                       |
| <i>Kctd13</i>              | potassium channel tetramerisation domain containing 13                           | NM_198736                                                                           | 1,35 | DNA replication                                       |
| <i>Qsox2</i>               | quiescin Q6 sulfhydryl oxidase 2                                                 | NM_001109434                                                                        | 1,35 | cell redox homeostasis                                |
| <i>Tysnd1</i>              | trypsin domain containing 1                                                      | NM_001108932                                                                        | 1,35 | proteolysis                                           |
| <i>Mrpl54</i>              | mitochondrial ribosomal protein L54                                              | NM_001106770                                                                        | 1,35 |                                                       |
| <i>Reep6</i>               | receptor accessory protein 6                                                     | NM_001013218                                                                        | 1,34 |                                                       |
| <i>Timp2</i>               | TIMP metalloproteinase inhibitor 2                                               | NM_021989                                                                           | 1,34 | spermatogenesis                                       |
| <i>Igfbp1</i>              | immunoglobulin (CD79A) binding protein 1                                         | NM_031624                                                                           | 1,34 | response to biotic stimulus                           |
| <i>Ergic3</i>              | ERGIC and golgi 3                                                                | NM_001106533                                                                        | 1,34 |                                                       |
| <i>Pold4</i>               | polymerase (DNA-directed), delta 4                                               | NM_001013195                                                                        | 1,34 | positive regulation of endothelial cell proliferation |
| <i>Bloc1s1</i>             | biogenesis of lysosomal organelles complex-1, subunit 1                          | NM_001105941                                                                        | 1,34 | post-Golgi vesicle-mediated transport                 |
| <i>Ocl1</i>                | occludin/ELL domain containing 1                                                 | NM_001106065                                                                        | 1,34 |                                                       |
| <i>Aplp2</i>               | amyloid beta (A4) precursor-like protein 2                                       | XM_001056214 /// XM_343513                                                          | 1,34 | suckling behavior                                     |
| <i>Bdh1</i>                | 3-hydroxybutyrate dehydrogenase, type 1                                          | NM_053995                                                                           | 1,34 | liver development                                     |
| <i>Gba</i>                 | glucosidase, beta, acid                                                          | NM_001127639                                                                        | 1,34 | carbohydrate metabolic process                        |
| <i>Mrps18a</i>             | mitochondrial ribosomal protein S18A                                             | NM_198756                                                                           | 1,34 | translation                                           |
| <i>Gle1</i>                | GLE1 RNA export mediator homolog (yeast)                                         | NM_001025731                                                                        | 1,34 | transport                                             |
| <i>Pnkd</i>                | paroxysmal nonkinesigenic dyskinesia precursor)                                  | NM_001134750 /// NM_001134751 ///<br>NM_001134753                                   | 1,34 |                                                       |
| <i>Clpb</i>                | ClpB caseinolytic peptidase B homolog (E. coli)                                  | NM_022947                                                                           | 1,34 | cellular response to heat                             |
| <i>Stxbp1</i>              | syntaxin binding protein 1                                                       | NM_013038                                                                           | 1,34 | platelet degranulation                                |
| <i>Ift81</i>               | intraflagellar transport 81 homolog (Chlamydomonas)                              | NM_199120                                                                           | 1,34 | multicellular organismal development                  |
| <i>Snca</i>                | synuclein, alpha (non A4 component of amyloid precursor)                         | NM_019169                                                                           | 1,34 | microglial cell activation                            |
| <i>Tspan14</i>             | Tetraspanin 14                                                                   | NM_001169127                                                                        | 1,34 |                                                       |
| <i>Lactb2</i>              | lactamase, beta 2                                                                | NM_001024247                                                                        | 1,33 |                                                       |
| <i>Pnpt1</i>               | polynucleotide nucleotidyltransferase 1                                          | NM_001142371                                                                        | 1,33 | RNA processing                                        |
| <i>Tpp1</i>                | tripeptidyl peptidase I                                                          | NM_031357                                                                           | 1,33 | proteolysis                                           |
| <i>Gstm1</i>               | glutathione S-transferase mu 1                                                   | NM_017014                                                                           | 1,33 | glutathione metabolic process                         |
| <i>Coro1a</i>              | coronin, actin binding protein 1A                                                | NM_130411                                                                           | 1,33 | phagolysosome assembly                                |
| <i>Vtn</i>                 | vitronectin                                                                      | NM_019156                                                                           | 1,33 | immune response                                       |
| <i>Dhx16</i>               | DEAH (Asp-Glu-Ala-His) box polypeptide 16                                        | NM_212496                                                                           | 1,33 |                                                       |
| <i>Rsp9</i>                | radial spoke head 9 homolog (Chlamydomonas)                                      | NM_001108205                                                                        | 1,33 | cilium movement                                       |
| <i>Setd8 /// Setd8-ps1</i> | SET domain containing (lysine methyltransferase) 8 /// SET domain containing (ly | XM_001072149 /// XM_002724818 ///<br>XM_573394                                      | 1,33 | negative regulation of transcription                  |

|                               |                                                                                         |                                             |      |                                                        |
|-------------------------------|-----------------------------------------------------------------------------------------|---------------------------------------------|------|--------------------------------------------------------|
| <i>Cdkn2c</i>                 | cyclin-dependent kinase inhibitor 2C (p18, inhibits CDK4)                               | NM_131902                                   | 1,33 | regulation of cyclin-dependent protein kinase activity |
| <i>Clns1a</i>                 | chloride channel, nucleotide-sensitive, 1A                                              | NM_031719                                   | 1,33 | spliceosomal snRNP assembly                            |
| <i>Sqstm1</i>                 | sequestosome 1                                                                          | NM_175843 /// NM_181550                     | 1,33 | positive regulation of protein phosphorylation         |
| <i>Atrx</i>                   | alpha thalassemia/mental retardation syndrome X-linked (RAD54 homolog, <i>S. cerevi</i> | NM_001105757                                | 1,33 | DNA repair                                             |
| <i>Atp9a</i> /// <i>Atp9b</i> | ATPase, class II, type 9A /// ATPase, class II, type 9B                                 | NM_001106130 /// XM_002726282               | 1,33 | ATP biosynthetic process                               |
| <i>Sepp1</i>                  | selenoprotein P, plasma, 1                                                              | NM_001083911 /// NM_019192                  | 1,33 | selenium metabolic process                             |
| <i>Jmjd8</i>                  | jumonji domain containing 8                                                             | NM_001014116                                | 1,33 |                                                        |
| <i>Tmem192</i>                | transmembrane protein 192                                                               | NM_001014141                                | 1,33 |                                                        |
| <i>Polr2g</i>                 | polymerase (RNA) II (DNA directed) polypeptide G                                        | NM_053948                                   | 1,33 | transcription                                          |
| <i>Tm7sf3</i>                 | transmembrane 7 superfamily member 3                                                    | NM_001011970                                | 1,33 |                                                        |
| <i>Bsn</i>                    | bassoon                                                                                 | NM_019146                                   | 1,33 | cytoskeleton organization                              |
| <i>Vrk1</i>                   | vaccinia related kinase 1                                                               | NM_001012194                                | 1,33 | protein phosphorylation                                |
| <i>Hsd17b12</i>               | hydroxysteroid (17-beta) dehydrogenase 12                                               | NM_032066                                   | 1,32 | steroid biosynthetic process                           |
| <i>Camk2n1</i>                | Calcium/calmodulin-dependent protein kinase II inhibitor 1                              | NM_173337                                   | 1,32 | synaptic transmission                                  |
| <i>Dnajc27</i>                | DnaJ (Hsp40) homolog, subfamily C, member 27                                            | NM_206845                                   | 1,32 | small GTPase mediated signal transduction              |
| <i>Rnf44</i>                  | Ring finger protein 44                                                                  | NM_001024795                                | 1,32 |                                                        |
| <i>Gfm1</i>                   | G elongation factor, mitochondrial 1                                                    | NM_053625                                   | 1,32 | translation                                            |
| <i>Dctn6</i>                  | dynactin 6                                                                              | NM_001106085                                | 1,32 |                                                        |
| <i>Cenpq</i>                  | centromere protein Q                                                                    | NM_001014215                                | 1,32 |                                                        |
| <i>Chid1</i>                  | chitinase domain containing 1                                                           | NM_001047854                                | 1,32 | carbohydrate metabolic process                         |
| <i>Cep70</i>                  | centrosomal protein 70kDa                                                               | NM_001017470                                | 1,32 |                                                        |
| <i>Adh5</i>                   | alcohol dehydrogenase 5                                                                 | NM_001126120                                | 1,32 | retinoid metabolic process                             |
| <i>Igfbp7</i>                 | insulin-like growth factor binding protein 7                                            | NM_001013048                                | 1,32 | regulation of cell growth                              |
| <i>Bin3</i>                   | bridging integrator 3                                                                   | NM_001013186                                | 1,32 | barrier septum formation                               |
| <i>Smyd4</i>                  | SET and MYND domain containing 4                                                        | NM_001105810                                | 1,32 |                                                        |
| <i>Cspg5</i>                  | chondroitin sulfate proteoglycan 5                                                      | NM_019284 /// NM_133652                     | 1,32 | multicellular organismal development                   |
| <i>Rabac1</i>                 | Rab acceptor 1 (prenylated)                                                             | NM_031774                                   | 1,32 | vesicle-mediated transport                             |
| <i>Plekhhg5</i>               | pleckstrin homology domain containing, family G (with RhoGef domain) member 5           | NM_201272                                   | 1,32 | apoptosis                                              |
| <i>Pcna</i>                   | proliferating cell nuclear antigen                                                      | NM_022381                                   | 1,32 | DNA replication                                        |
| <i>Gltscr2</i>                | glioma tumor suppressor candidate region gene 2                                         | NM_207591                                   | 1,32 |                                                        |
| <i>Crbn</i>                   | cereblon                                                                                | NM_001015003                                | 1,32 | proteolysis                                            |
| <i>Nsg2</i>                   | neuron specific gene family member 2                                                    | NM_001034152                                | 1,32 | dopamine receptor signaling pathway                    |
| <i>Mapkapk5</i>               | mitogen-activated protein kinase-activated protein kinase 5                             | NM_001025761 /// NM_001164043               | 1,32 | protein phosphorylation                                |
| <i>Tmem59l</i>                | transmembrane protein 59-like                                                           | XM_001067996 /// XM_224729                  | 1,32 |                                                        |
| <i>Cnot8</i>                  | CCR4-NOT transcription complex, subunit 8                                               | NM_001008382                                | 1,32 |                                                        |
| <i>Commf7</i>                 | COMM domain containing 7                                                                | NM_001030029                                | 1,32 | negative regulation of transcription                   |
| <i>Phf20</i>                  | PHD finger protein 20                                                                   | NM_001107795                                | 1,32 |                                                        |
| <i>Cdk5rap2</i>               | CDK5 regulatory subunit associated protein 2                                            | NM_173134 /// XM_001059116 /// XM_575844    | 1,31 | microtubule cytoskeleton organization                  |
| <i>Lxn</i>                    | latexin                                                                                 | NM_031655                                   | 1,31 | negative regulation of endopeptidase activity          |
| <i>Mtus1</i>                  | mitochondrial tumor suppressor 1                                                        | NM_178093                                   | 1,31 | cell cycle                                             |
| <i>Mex3b</i>                  | mex3 homolog B ( <i>C. elegans</i> )                                                    | NM_001191626 /// XM_001068105 /// XM_218846 | 1,31 |                                                        |

|                            |                                                                                  |                                                                            |       |                                                                      |
|----------------------------|----------------------------------------------------------------------------------|----------------------------------------------------------------------------|-------|----------------------------------------------------------------------|
| <i>Cyth2</i>               | cytohesin 2                                                                      | NM_053911                                                                  | 1,31  | dendrite development                                                 |
| <i>Tmpo</i>                | thymopoietin                                                                     | NM_012887                                                                  | 1,31  | nuclear envelope reassembly                                          |
| <i>Eif2b3</i>              | eukaryotic translation initiation factor 2B, subunit 3<br>gamma                  | NM_133609                                                                  | 1,31  | translation                                                          |
| <i>Tcf19</i>               | transcription factor 19                                                          | NM_213561                                                                  | 1,31  |                                                                      |
| <i>H3f3b</i>               | H3 histone, family 3B                                                            | NM_053985                                                                  | 1,31  | nucleosome assembly                                                  |
| <i>Tusc2</i>               | tumor suppressor candidate 2                                                     | NM_001109297                                                               | 1,31  |                                                                      |
| <i>Rnf208</i>              | ring finger protein 208                                                          | NM_001109195                                                               | 1,31  |                                                                      |
| <i>Tmem176a</i>            | transmembrane protein 176A                                                       | NM_001039008                                                               | 1,31  |                                                                      |
| <i>Tspan6</i>              | tetraspanin 6                                                                    | NM_001100672                                                               | 1,31  | positive regulation of I-kappaB kinase/NF-kappaB cascade             |
| <i>Exoc7</i>               | exocyst complex component 7                                                      | NM_022691                                                                  | 1,31  | transport                                                            |
| <i>Ephx1</i>               | epoxide hydrolase 1, microsomal                                                  | NM_001034090 /// NM_012844                                                 | 1,31  | cellular aromatic compound metabolic process                         |
| <i>Zfp91</i>               | zinc finger protein 91                                                           | NM_001169120                                                               | 1,31  |                                                                      |
| <i>Wdr8</i>                | WD repeat domain 8                                                               | NM_001014262                                                               | 1,31  |                                                                      |
| <i>Prdm2</i>               | PR domain containing 2, with ZNF domain                                          | NM_001077648                                                               | 1,31  | transcription                                                        |
| <i>Alkbh2</i>              | alkB, alkylation repair homolog 2 (E. coli)                                      | NM_001126273                                                               | 1,31  | DNA dealkylation involved in DNA repair                              |
| <i>Sil1</i>                | SIL1 homolog, endoplasmic reticulum chaperone (S. cerevisiae)                    | NM_199376                                                                  | 1,31  | transport                                                            |
| <i>Morn1</i>               | MORN repeat containing 1                                                         | NM_001005544                                                               | 1,31  |                                                                      |
| <i>Spata6</i>              | spermatogenesis associated 6                                                     | NM_134392                                                                  | 1,31  | multicellular organismal development                                 |
| <i>Stmn1</i>               | stathmin 1                                                                       | NM_017166                                                                  | 1,31  | microtubule depolymerization                                         |
| <i>Tnfrsf12</i>            | tumor necrosis factor ligand superfamily member 12                               | NM_001001513                                                               | 1,31  | immune response                                                      |
| <i>Slpi</i>                | secretory leukocyte peptidase inhibitor                                          | NM_053372                                                                  | 1,31  |                                                                      |
| <i>Snx9</i>                | sorting nexin 9                                                                  | NM_001127637                                                               | 1,31  | cell communication                                                   |
| <i>Abhd8</i>               | abhydrolase domain containing 8                                                  | NM_001107301                                                               | 1,30  |                                                                      |
| <i>Ddx20</i>               | DEAD (Asp-Glu-Ala-Asp) box polypeptide 20                                        | NM_001191711 /// XM_001066705 /// XM_227558                                | 1,30  | negative regulation of transcription from RNA polymerase II promoter |
| <i>Mllt4</i>               | myeloid/lymphoid or mixed-lineage leukemia (trithorax homolog, Drosophila); tran | NM_013217                                                                  | 1,30  | cell adhesion                                                        |
| <i>Parl</i>                | presenilin associated, rhomboid-like                                             | NM_001035249                                                               | 1,30  |                                                                      |
| <i>Decr2 /// Rab11fip3</i> | 2,4-dienoyl CoA reductase 2, peroxisomal /// RAB11 family interacting protein 3  | NM_171996 /// XM_001062691 /// XM_002724662 /// XM_002727755 /// XM_220262 | 1,30  | cytokinesis                                                          |
| <i>Evi2a</i>               | ecotropic viral integration site 2A                                              | NM_001044287                                                               | 1,30  |                                                                      |
| <i>Sirt5</i>               | sirtuin (silent mating type information regulation 2 homolog) 5 (S. cerevisiae)  | NM_001004256                                                               | 1,30  | chromatin silencing                                                  |
| <i>Slit2</i>               | slit homolog 2 (Drosophila)                                                      | NM_022632                                                                  | 1,30  | luteolysis                                                           |
| <i>Bace2</i>               | beta-site APP-cleaving enzyme 2                                                  | NM_001002802                                                               | 1,30  | proteolysis                                                          |
| <i>Asmtl</i>               | acetylserotonin O-methyltransferase-like                                         | NM_001105915                                                               | 1,30  |                                                                      |
| <i>Pmp22</i>               | peripheral myelin protein 22                                                     | NM_017037                                                                  | 1,30  | cell cycle                                                           |
| <i>Hn1</i>                 | hematological and neurological expressed 1                                       | NM_001005876                                                               | 1,30  |                                                                      |
| <i>Plod1</i>               | procollagen-lysine 1, 2-oxoglutarate 5-dioxygenase 1                             | NM_053827                                                                  | 1,30  | response to hypoxia                                                  |
| <i>Pola1</i>               | polymerase (DNA directed), alpha 1                                               | NM_053479 /// XM_001064735 /// XM_242396                                   | 1,30  | S phase of mitotic cell cycle                                        |
| <b>Down-regulated</b>      |                                                                                  |                                                                            |       |                                                                      |
| <i>Mybpc1</i>              | myosin binding protein C, slow type                                              | NM_001100758 /// XM_001076591 /// XM_343196                                | -7,42 | muscle contraction                                                   |

|                 |                                                                           |                                             |              |                                                                       |
|-----------------|---------------------------------------------------------------------------|---------------------------------------------|--------------|-----------------------------------------------------------------------|
| <i>Hspb7</i>    | heat shock protein family, member 7 (cardiovascular)                      | NM_031607                                   | <b>-4,50</b> | response to stress                                                    |
| <i>Fgl2</i>     | fibrinogen-like 2                                                         | NM_053455                                   | <b>-4,04</b> | signal transduction                                                   |
| <i>Bean</i>     | brain expressed, associated with Nedd4                                    | XM_001057606 /// XM_341638                  | <b>-3,59</b> |                                                                       |
| <i>Pycr1</i>    | pyrroline-5-carboxylate reductase 1                                       | NM_001105857                                | <b>-3,10</b> | proline biosynthetic process                                          |
| <i>Enpep</i>    | glutamyl aminopeptidase                                                   | NM_022251                                   | <b>-2,97</b> | proteolysis                                                           |
| <i>RT1-Ba</i>   | RT1 class II antigen, Ba chain                                            | NM_001008831                                | <b>-2,96</b> | antigen processing and presentation of peptide                        |
| <i>Rbp4</i>     | retinol binding protein 4, plasma                                         | NM_013162                                   | <b>-2,74</b> | eye development                                                       |
| <i>Ptprz1</i>   | protein tyrosine phosphatase, receptor-type, Z polypeptide 1              | NM_001170685 /// NM_013080                  | <b>-2,68</b> | protein dephosphorylation                                             |
| <i>Sstr2</i>    | somatostatin receptor 2                                                   | NM_019348                                   | <b>-2,66</b> | regulation of muscle contraction                                      |
| <i>Clcnkb</i>   | chloride channel Kb                                                       | NM_173103                                   | <b>-2,60</b> | transport                                                             |
| <i>Gpc3</i>     | glypican 3                                                                | NM_012774                                   | <b>-2,60</b> | branching involved in ureteric bud morphogenesis                      |
| <i>Dlk1</i>     | delta-like 1 homolog (Drosophila)                                         | NM_053744                                   | <b>-2,57</b> | embryo development                                                    |
| <i>Colec11</i>  | collectin sub-family member 11                                            | XM_002726687 /// XM_002729610               | <b>-2,49</b> |                                                                       |
| <i>Grb10</i>    | growth factor receptor bound protein 10                                   | NM_001109093                                | <b>-2,43</b> | signal transduction                                                   |
| <i>Abcc8</i>    | ATP-binding cassette, sub-family C (CFTR/MRP), member 8                   | NM_013039                                   | <b>-2,40</b> | transport                                                             |
| <i>Es1</i>      | esterase 1 /// microsomal carboxylesterase E1-like                        | NM_017004 /// XM_002725379                  | <b>-2,35</b> | metabolic process                                                     |
| <i>Ntrk2</i>    | neurotrophic tyrosine kinase, receptor, type 2                            | NM_001163168 /// NM_001163169 /// NM_012731 | <b>-2,35</b> | vasculogenesis                                                        |
| <i>Nckap1l</i>  | NCK associated protein 1 like                                             | NM_001108119                                | <b>-2,31</b> | B cell homeostasis                                                    |
| <i>Ccnd2</i>    | cyclin D2                                                                 | NM_022267                                   | <b>-2,28</b> | G1/S transition of mitotic cell cycle                                 |
| <i>Ppm1j</i>    | protein phosphatase 1J                                                    | NM_001005540                                | <b>-2,10</b> | protein dephosphorylation                                             |
| <i>Rem2</i>     | RAS (RAD and GEM) like GTP binding 2                                      | NM_022685                                   | <b>-2,09</b> | regulation of transcription, DNA-dependent                            |
| <i>Slc16a1</i>  | solute carrier family 16, member 1 (monocarboxylic acid transporter 1)    | NM_012716                                   | <b>-2,08</b> | transport                                                             |
| <i>Rab3d</i>    | RAB3D, member RAS oncogene family                                         | NM_080580                                   | <b>-2,05</b> | transport                                                             |
| <i>H2-Ea</i>    | MHC class II RT1D alpha chain antigen                                     | NM_001008847                                | <b>-2,04</b> | antigen processing and presentation of peptide or polysaccharide anti |
| <i>Amigo3</i>   | adhesion molecule with Ig like domain 3                                   | NM_178144                                   | <b>-2,02</b> | cell adhesion                                                         |
| <i>Ndn</i>      | neccin homolog (mouse)                                                    | NM_001008558                                | <b>-2,01</b> | neuron migration                                                      |
| <i>Vldlr</i>    | very low density lipoprotein receptor                                     | NM_013155                                   | <b>-1,98</b> | response to hypoxia                                                   |
| <i>Fshb</i>     | follicle stimulating hormone, beta polypeptide                            | NM_001007597                                | <b>-1,97</b> | transforming growth factor beta receptor signaling pathway            |
| <i>HLA-drb1</i> | MHC class II RT1D beta1 chain antigen                                     | NM_001008884                                | <b>-1,96</b> | antigen processing and presentation of peptide or polysaccharide anti |
| <i>Col24a1</i>  | collagen, type XXIV, alpha 1                                              | XM_002726055 /// XM_575056                  | <b>-1,96</b> | cell adhesion                                                         |
| <i>Rcn3</i>     | reticulocalbin 3, EF-hand calcium binding domain                          | NM_001008694                                | <b>-1,94</b> |                                                                       |
| <i>Oaf</i>      | OAF homolog (Drosophila)                                                  | NM_001014090                                | <b>-1,93</b> |                                                                       |
| <i>Tubb6</i>    | tubulin, beta 6                                                           | NM_001025675                                | <b>-1,93</b> | microtubule-based process                                             |
| <i>Ace</i>      | angiotensin I converting enzyme (peptidyl-dipeptidase A) 1                | NM_012544                                   | <b>-1,91</b> | response to hypoxia                                                   |
| <i>Scnn1g</i>   | sodium channel, nonvoltage-gated 1, gamma                                 | NM_017046                                   | <b>-1,88</b> | response to hypoxia                                                   |
| <i>Spp1</i>     | secreted phosphoprotein 1                                                 | NM_012881                                   | <b>-1,87</b> | ossification                                                          |
| <i>Lhb</i>      | luteinizing hormone beta                                                  | NM_001033975 /// NM_012858                  | <b>-1,87</b> |                                                                       |
| <i>Kcnj11</i>   | potassium inwardly rectifying channel, subfamily J, member 11             | NM_031358                                   | <b>-1,87</b> | glucose metabolic process                                             |
| <i>Cd74</i>     | Cd74 molecule, major histocompatibility complex, class II invariant chain | NM_013069                                   | <b>-1,86</b> | activation of MAPK activity                                           |

|                 |                                                                                  |                               |       |                                                     |
|-----------------|----------------------------------------------------------------------------------|-------------------------------|-------|-----------------------------------------------------|
| <i>Elovl5</i>   | ELOVL family member 5, elongation of long chain fatty acids (yeast)              | NM_134382                     | -1,86 | fatty acid biosynthetic process                     |
| <i>Mapkapk3</i> | mitogen-activated protein kinase-activated protein kinase 3                      | NM_001012127                  | -1,85 | protein phosphorylation                             |
| <i>Sfxn1</i>    | sideroflexin 1                                                                   | NM_001012213                  | -1,84 | transport                                           |
| <i>Bcan</i>     | brevican                                                                         | NM_001033665 /// NM_012916    | -1,83 | cell adhesion                                       |
| <i>Lamc2</i>    | laminin, gamma 2                                                                 | NM_001100640                  | -1,83 | cell adhesion                                       |
| <i>Spata1</i>   | spermatogenesis associated 1                                                     | NM_001014177                  | -1,81 | proteolysis                                         |
| <i>Lepre1</i>   | leucine proline-enriched proteoglycan (leprecan) 1                               | NM_053667                     | -1,80 | cell growth                                         |
| <i>Slc41a2</i>  | Solute carrier family 41, member 2                                               | NM_001108742                  | -1,80 |                                                     |
| <i>Aldh18a1</i> | aldehyde dehydrogenase 18 family, member A1                                      | NM_001108524                  | -1,79 | proline biosynthetic process                        |
| <i>Htatip2</i>  | HIV-1 tat interactive protein 2, homolog (human)                                 | NM_001106263                  | -1,78 | cellular amino acid metabolic process               |
| <i>Fxyd6</i>    | FXYD domain-containing ion transport regulator 6                                 | NM_022005                     | -1,76 | transport                                           |
| <i>Rnd3</i>     | Rho family GTPase 3                                                              | NM_001007641                  | -1,76 | small GTPase mediated signal transduction           |
| <i>Usp13</i>    | Ubiquitin specific protease 13 (isopeptidase T-3)                                | NM_001107665                  | -1,76 | ubiquitin-dependent protein catabolic process       |
| <i>Fam114a1</i> | Family with sequence similarity 114, member A1                                   | XM_001078310 /// XM_573600    | -1,76 |                                                     |
| <i>Ptpn3</i>    | protein tyrosine phosphatase, non-receptor type 3                                | XM_001055793 /// XM_001059757 | -1,75 | protein dephosphorylation                           |
| <i>Adamtsl4</i> | ADAMTS-like 4                                                                    | NM_001034012                  | -1,75 | apoptosis                                           |
| <i>Pcdh21</i>   | protocadherin 21                                                                 | NM_053572                     | -1,75 | cell adhesion                                       |
| <i>Ppap2c</i>   | phosphatidic acid phosphatase type 2c                                            | NM_139252                     | -1,74 |                                                     |
| <i>Mx2</i>      | myxovirus (influenza virus) resistance 2                                         | NM_134350                     | -1,73 | response to virus                                   |
| <i>Rtn4r</i>    | reticulon 4 receptor                                                             | NM_053613                     | -1,72 | axonogenesis                                        |
| <i>Lyz2</i>     | lysozyme 2                                                                       | NM_012771                     | -1,72 | metabolic process                                   |
| <i>Camk1g</i>   | calcium/calmodulin-dependent protein kinase IG                                   | NM_182842                     | -1,72 | protein phosphorylation                             |
| <i>Gmppb</i>    | GDP-mannose pyrophosphorylase B                                                  | NM_001108781                  | -1,71 | biosynthetic process                                |
| <i>Fitm1</i>    | fat storage-inducing transmembrane protein 1                                     | NM_001106037                  | -1,69 | positive regulation of sequestering of triglyceride |
| <i>Epor</i>     | erythropoietin receptor                                                          | NM_017002                     | -1,69 | signal transduction                                 |
| <i>Plat</i>     | plasminogen activator, tissue                                                    | NM_013151                     | -1,67 | response to hypoxia                                 |
| <i>Chpt1</i>    | choline phosphotransferase 1                                                     | NM_001007750                  | -1,66 | phosphatidylcholine biosynthetic process            |
| <i>Dsp</i>      | desmoplakin                                                                      | XM_001058477 /// XM_225259    | -1,66 | cell-cell adhesion                                  |
| <i>Dpp3</i>     | dipeptidylpeptidase 3 /// similar to Dipeptidyl-peptidase 3 (Dipeptidyl-peptidas | NM_053748 /// XM_001053134    | -1,66 | proteolysis                                         |
| <i>Heatr5a</i>  | HEAT repeat containing 5A                                                        | XM_001075318 /// XM_343061    | -1,65 |                                                     |
| <i>Gga2</i>     | golgi associated, gamma adaptin ear containing, ARF binding protein 2            | NM_001100519                  | -1,64 | intracellular protein transport                     |
| <i>Arhgap9</i>  | Rho GTPase activating protein 9                                                  | NM_001012198 /// NM_001080789 | -1,63 | signal transduction                                 |
| <i>Pabpc4</i>   | poly(A) binding protein, cytoplasmic 4                                           | NM_001100538                  | -1,63 |                                                     |
| <i>Srm</i>      | spermidine synthase                                                              | NM_053464                     | -1,61 | spermidine biosynthetic process                     |
| <i>Scly</i>     | selenocysteine lyase                                                             | NM_001007755                  | -1,61 | metabolic process                                   |
| <i>Tesc</i>     | tescalcin                                                                        | XM_001076953 /// XM_213790    | -1,61 | negative regulation of cell proliferation           |
| <i>Sec24d</i>   | SEC24 family, member D (S. cerevisiae)                                           | NM_001107723                  | -1,60 | transport                                           |
| <i>Trim5</i>    | tripartite motif-containing 5                                                    | NM_001014023                  | -1,60 | protein trimerization                               |
| <i>Map2k3</i>   | mitogen activated protein kinase kinase 3                                        | NM_001100674                  | -1,59 | MAPKKK cascade                                      |
| <i>Gsdma</i>    | gasdermin A                                                                      | NM_001108297                  | -1,59 | induction of apoptosis                              |
| <i>Prrc1</i>    | proline-rich coiled-coil 1                                                       | NM_001033887                  | -1,59 |                                                     |
| <i>Pelo</i>     | pelota homolog (Drosophila)                                                      | NM_001007634                  | -1,59 | translation                                         |
| <i>Kcnk10</i>   | potassium channel, subfamily K, member 10                                        | NM_023096                     | -1,59 | transport                                           |
| <i>Nab1</i>     | Ngfi-A binding protein 1                                                         | NM_022856                     | -1,58 | endochondral ossification                           |
| <i>Scn5a</i>    | sodium channel, voltage-gated, type V, alpha subunit                             | NM_001160162 /// NM_013125    | -1,57 | transport                                           |

|                 |                                                                      |                                                                                        |       |                                                            |
|-----------------|----------------------------------------------------------------------|----------------------------------------------------------------------------------------|-------|------------------------------------------------------------|
| <i>Trim54</i>   | tripartite motif-containing 54                                       | NM_001013217                                                                           | -1,56 | negative regulation of microtubule depolymerization        |
| <i>Gltpd1</i>   | glycolipid transfer protein domain containing 1                      | NM_001007703                                                                           | -1,56 | glycolipid transport                                       |
| <i>Fkbp11</i>   | FK506 binding protein 11                                             | NM_001013105                                                                           | -1,56 | protein folding                                            |
| <i>Gas5</i>     | growth arrest specific 5                                             | NR_002704                                                                              | -1,55 |                                                            |
| <i>Ifi44</i>    | interferon-induced protein 44                                        | NM_001107729                                                                           | -1,55 |                                                            |
| <i>Steap2</i>   | six transmembrane epithelial antigen of the prostate 2               | NM_001107846                                                                           | -1,54 | Golgi to plasma membrane transport                         |
| <i>Tmem165</i>  | transmembrane protein 165                                            | NM_001024802                                                                           | -1,54 |                                                            |
| <i>Spire1</i>   | spire homolog 1 (Drosophila)                                         | NM_001107381                                                                           | -1,54 | Golgi vesicle transport                                    |
| <i>Samd4a</i>   | Sterile alpha motif domain containing 4A                             | NM_001107254                                                                           | -1,54 | regulation of translation                                  |
| <i>Sstr3</i>    | somatostatin receptor 3                                              | NM_133522                                                                              | -1,54 | signal transduction                                        |
| <i>Itsn1</i>    | intersectin 1 (SH3 domain protein)                                   | NM_001136096 /// NM_019227                                                             | -1,54 | exocytosis                                                 |
| <i>Rcn1</i>     | reticulocalbin 1, EF-hand calcium binding domain                     | NM_001108586                                                                           | -1,54 |                                                            |
| <i>Rtn4r</i>    | reticulon 4 receptor                                                 | NM_053613                                                                              | -1,53 | axonogenesis                                               |
| <i>Slc38a10</i> | solute carrier family 38, member 10                                  | XM_001081798 /// XM_001081800 ///<br>XM_002724582 /// XM_002727846 ///<br>XM_002727847 | -1,53 |                                                            |
| <i>Mtmr2</i>    | myotubularin related protein 2                                       | NM_001108123                                                                           | -1,53 | dephosphorylation                                          |
| <i>Acs1</i>     | acyl-CoA synthetase long-chain family member 1                       | NM_012820                                                                              | -1,52 | lipid metabolic process                                    |
| <i>Rps6ka1</i>  | ribosomal protein S6 kinase polypeptide 1                            | NM_031107                                                                              | -1,52 | protein phosphorylation                                    |
| <i>Fkbp14</i>   | FK506 binding protein 14                                             | NM_001013210                                                                           | -1,52 | protein folding                                            |
| <i>Golt1b</i>   | golgi transport 1 homolog B (S. cerevisiae)                          | NM_001113783                                                                           | -1,51 | vesicle-mediated transport                                 |
| <i>St8sia3</i>  | ST8 alpha-N-acetyl-neuraminide alpha-2,8-sialyltransferase 3         | NM_013029                                                                              | -1,50 | protein glycosylation                                      |
| <i>Pfkfb4</i>   | 6-phosphofructo-2-kinase/fructose-2,6-biphosphatase 4                | NM_019333                                                                              | -1,50 | fructose metabolic process                                 |
| <i>Ltbp4</i>    | latent transforming growth factor beta binding protein 4             | NM_001170336                                                                           | -1,50 | transforming growth factor beta receptor signaling pathway |
| <i>Tmem150a</i> | transmembrane protein 150A                                           | NM_139107                                                                              | -1,49 | catabolic process                                          |
| <i>Iqsec3</i>   | IQ motif and Sec7 domain 3                                           | NM_207617                                                                              | -1,48 | regulation of ARF protein signal transduction              |
| <i>Ednra</i>    | endothelin receptor type A                                           | NM_012550                                                                              | -1,48 | patterning of blood vessels                                |
| <i>Mlec</i>     | malectin                                                             | NM_001013983                                                                           | -1,47 | carbohydrate metabolic process                             |
| <i>Abcc5</i>    | ATP-binding cassette, sub-family C (CFTR/MRP), member 5              | NM_053924                                                                              | -1,47 | transport                                                  |
| <i>Oasl</i>     | 2'-5'-oligoadenylate synthetase-like                                 | NM_001009681                                                                           | -1,47 | immune response                                            |
| <i>Grb14</i>    | growth factor receptor bound protein 14                              | NM_031623                                                                              | -1,47 | signal transduction                                        |
| <i>Cnih</i>     | cornichon homolog (Drosophila)                                       | NM_001106029                                                                           | -1,46 | intracellular signaling pathway                            |
| <i>Ptpnk</i>    | protein tyrosine phosphatase, receptor type, K, extracellular region | NM_001029902                                                                           | -1,46 | protein dephosphorylation                                  |
| <i>Ap2a2</i>    | adaptor-related protein complex 2, alpha 2 subunit                   | NM_031008                                                                              | -1,46 | transport                                                  |
| <i>Hr</i>       | hairless                                                             | NM_024364                                                                              | -1,46 | transcription                                              |
| <i>Otud7a</i>   | OTU domain containing 7A                                             | XM_001058176 /// XM_219703                                                             | -1,46 |                                                            |
| <i>Degs1</i>    | degenerative spermatocyte homolog 1, lipid desaturase (Drosophila)   | NM_053323                                                                              | -1,46 | lipid metabolic process                                    |
| <i>Plcg2</i>    | phospholipase C, gamma 2                                             | NM_017168                                                                              | -1,46 | follicular B cell differentiation                          |
| <i>Gcs1</i>     | glucosidase 1                                                        | NM_031749                                                                              | -1,46 | metabolic process                                          |
| <i>Plxna3</i>   | plexin A3                                                            | NM_001107581                                                                           | -1,46 | signal transduction                                        |
| <i>Nrsn1</i>    | neurensin 1                                                          | NM_001106109                                                                           | -1,45 | nervous system development                                 |
| <i>Ivns1abp</i> | influenza virus NS1A binding protein                                 | NM_001047085                                                                           | -1,44 |                                                            |



|                   |                                                                                  |                                                |       |                                                                      |
|-------------------|----------------------------------------------------------------------------------|------------------------------------------------|-------|----------------------------------------------------------------------|
| <i>Camk2b</i>     | calcium/calmodulin-dependent protein kinase II beta                              | NM_001042354 /// NM_001042356 /// NM_021739    | -1,44 | G1/S transition of mitotic cell cycle                                |
| <i>Slc35e1</i>    | solute carrier family 35, member E1                                              | NM_001109107                                   | -1,44 | transport                                                            |
| <i>Tmem185a</i>   | transmembrane protein 185A                                                       | NM_001135712                                   | -1,44 |                                                                      |
| <i>Homer2</i>     | homer homolog 2 (Drosophila)                                                     | NM_053309                                      | -1,44 |                                                                      |
| <i>Iars</i>       | isoleucyl-tRNA synthetase                                                        | NM_001100572                                   | -1,44 | translation                                                          |
| <i>Igsf1</i>      | immunoglobulin superfamily, member 1                                             | NM_175763                                      | -1,43 | signal transduction                                                  |
| <i>Chka</i>       | choline kinase alpha                                                             | NM_017127                                      | -1,43 | phosphatidylethanolamine biosynthetic process                        |
| <i>Csgalnact2</i> | chondroitin sulfate N-acetylgalactosaminyltransferase 2                          | NM_001106616                                   | -1,43 | proteoglycan biosynthetic process                                    |
| <i>Cad</i>        | carbamoyl-phosphate synthetase 2, aspartate transcarbamylase, and dihydroorotase | NM_001105710                                   | -1,43 | 'de novo' pyrimidine base biosynthetic process                       |
| <i>Col2a1</i>     | collagen, type II, alpha 1                                                       | NM_012929                                      | -1,43 | skeletal system development                                          |
| <i>Doc2b</i>      | double C2-like domains, beta                                                     | NM_031142                                      | -1,43 | transport                                                            |
| <i>Copb2</i>      | coatamer protein complex, subunit beta 2 (beta prime)                            | NM_021765                                      | -1,42 | transport                                                            |
| <i>Rab2b</i>      | RAB2B, member RAS oncogene family                                                | NM_001037645                                   | -1,42 | small GTPase mediated signal transduction                            |
| <i>Tmem39a</i>    | transmembrane protein 39a                                                        | NM_001013865                                   | -1,42 |                                                                      |
| <i>Isg20</i>      | interferon stimulated exonuclease gene 20                                        | NM_001008510                                   | -1,42 | DNA catabolic process, exonucleolytic                                |
| <i>Dnajb5</i>     | DnaJ (Hsp40) homolog, subfamily B, member 5                                      | NM_001108004                                   | -1,42 | negative regulation of transcription from RNA polymerase II promoter |
| <i>Col1a1</i>     | collagen, type I, alpha 1                                                        | NM_053304                                      | -1,42 | skeletal system development                                          |
| <i>Synm</i>       | synemin, intermediate filament protein                                           | NM_001134858                                   | -1,42 |                                                                      |
| <i>Hdlbp</i>      | high density lipoprotein binding protein                                         | NM_172039                                      | -1,42 | lipid metabolic process                                              |
| <i>Ppfibp1</i>    | PTPRF interacting protein, binding protein 1 (liprin beta 1)                     | NM_001107896                                   | -1,42 |                                                                      |
| <i>Pdyn</i>       | prodynorphin                                                                     | NM_019374                                      | -1,41 | neuropeptide signaling pathway                                       |
| <i>Ddx25</i>      | DEAD (Asp-Glu-Ala-Asp) box polypeptide 25                                        | NM_031630                                      | -1,41 | ATP catabolic process                                                |
| <i>Srp72</i>      | signal recognition particle 72                                                   | NM_001170601 /// XM_001066751 /// XM_001074215 | -1,41 | SRP-dependent cotranslational protein targeting to membrane          |
| <i>Sez6l2</i>     | seizure related 6 homolog (mouse)-like 2                                         | NM_001107550                                   | -1,41 |                                                                      |
| <i>Fndc3b</i>     | fibronectin type III domain containing 3B                                        | NM_001191704 /// XM_001057133 /// XM_226988    | -1,41 | positive regulation of fat cell differentiation                      |
| <i>Slc2a4</i>     | solute carrier family 2 (facilitated glucose transporter), member 4              | NM_012751                                      | -1,41 | transport                                                            |
| <i>Slc35e3</i>    | solute carrier family 35, member E3                                              | NM_001134687                                   | -1,41 |                                                                      |
| <i>Uba5</i>       | ubiquitin-like modifier activating enzyme 5                                      | NM_001009669                                   | -1,40 | metabolic process                                                    |
| <i>Golga3</i>     | golgi autoantigen, golgin subfamily a, 3                                         | NM_001107847                                   | -1,40 |                                                                      |
| <i>Marveld1</i>   | MARVEL domain containing 1                                                       | NM_001107590                                   | -1,40 |                                                                      |
| <i>Cobl</i>       | cordon-bleu homolog (mouse)                                                      | NM_001107236                                   | -1,40 | neural tube closure                                                  |
| <i>Txndc11</i>    | thioredoxin domain containing 11                                                 | NM_001127532                                   | -1,40 | cell redox homeostasis                                               |
| <i>Syncrip</i>    | Synaptotagmin binding, cytoplasmic RNA interacting protein                       | NM_001047916                                   | -1,40 | mRNA processing                                                      |
| <i>Fam107a</i>    | family with sequence similarity 107, member A /// downregulated in renal cell ca | NM_001025129 /// XM_002725042 /// XM_002725043 | -1,39 | regulation of cell growth                                            |
| <i>Fam98a</i>     | family with sequence similarity 98, member A                                     | NM_001014073                                   | -1,39 |                                                                      |
| <i>Oxnad1</i>     | oxidoreductase NAD-binding domain containing 1                                   | NM_001107295                                   | -1,39 | oxidation reduction                                                  |
| <i>Mark1</i>      | MAP/microtubule affinity-regulating kinase 1                                     | NM_053947                                      | -1,39 | microtubule cytoskeleton organization                                |
| <i>Ppapdc1b</i>   | phosphatidic acid phosphatase type 2 domain containing 1B                        | NM_001109411                                   | -1,39 |                                                                      |

|                 |                                                                      |                                             |       |                                                                       |
|-----------------|----------------------------------------------------------------------|---------------------------------------------|-------|-----------------------------------------------------------------------|
| <i>Ostc</i>     | oligosaccharyltransferase complex subunit                            | NM_001108566                                | -1,39 |                                                                       |
| <i>Gramd1b</i>  | GRAM domain containing 1B                                            | NM_001191616 /// XM_001059472 /// XM_217113 | -1,39 |                                                                       |
| <i>Icam5</i>    | intercellular adhesion molecule 5, telencephalin                     | NM_001172079 /// XM_001077293 /// XM_233737 | -1,39 | phagocytosis                                                          |
| <i>Lynx1</i>    | Ly6/neurotoxin 1                                                     | NM_001130546                                | -1,38 | pathogenesis                                                          |
| <i>Nlgn3</i>    | Neuroigin 3                                                          | NM_134336                                   | -1,38 | regulation of respiratory gaseous exchange by neurological system pro |
| <i>Adamts12</i> | ADAMTS-like 2                                                        | XM_001078833 /// XM_231125                  | -1,38 |                                                                       |
| <i>Cnih2</i>    | cornichon homolog 2 (Drosophila)                                     | NM_001025132                                | -1,38 | intracellular signaling pathway                                       |
| <i>Pcp4</i>     | Purkinje cell protein 4                                              | NM_013002                                   | -1,38 |                                                                       |
| <i>Aldh1l2</i>  | aldehyde dehydrogenase 1 family, member L2                           | NM_001191778 /// XM_001079663 /// XM_235005 | -1,38 | one-carbon metabolic process                                          |
| <i>Ubash3b</i>  | ubiquitin associated and SH3 domain containing, B                    | NM_001191792 /// XM_001065047 /// XM_236104 | -1,38 |                                                                       |
| <i>Bzw1</i>     | basic leucine zipper and W2 domains 1                                | NM_198789                                   | -1,38 | transcription                                                         |
| <i>Zcchc12</i>  | zinc finger, CCHC domain containing 12                               | NM_001014065                                | -1,37 | transcription                                                         |
| <i>Zfp853</i>   | zinc finger protein 853                                              | XM_002724787 /// XM_221915                  | -1,37 |                                                                       |
| <i>Cables1</i>  | Cdk5 and Abl enzyme substrate 1                                      | NM_001107404                                | -1,37 | nervous system development                                            |
| <i>Ptk7</i>     | PTK7 protein tyrosine kinase 7                                       | NM_001106889                                | -1,37 | neural tube closure                                                   |
| <i>Ttyh3</i>    | tweety homolog 3 (Drosophila)                                        | NM_001107124                                | -1,37 |                                                                       |
| <i>Man1b1</i>   | mannosidase, alpha, class 1B, member 1                               | XM_001077558 /// XM_575086                  | -1,37 | metabolic process                                                     |
| <i>Glb1l2</i>   | galactosidase, beta 1-like 2                                         | NM_001192018 /// XM_001053731 /// XM_578717 | -1,37 | carbohydrate metabolic process                                        |
| <i>Fam98a</i>   | family with sequence similarity 98, member A                         | NM_001014073                                | -1,37 |                                                                       |
| <i>Dgkz</i>     | diacylglycerol kinase zeta                                           | NM_031143                                   | -1,36 | activation of protein kinase C activity by G-protein coupled receptor |
| <i>Aldh1a2</i>  | aldehyde dehydrogenase 1 family, member A2                           | NM_053896                                   | -1,36 | blood vessel development                                              |
| <i>Ddx39</i>    | DEAD (Asp-Glu-Ala-Asp) box polypeptide 39                            | NM_053563                                   | -1,35 | nuclear mRNA splicing, via spliceosome                                |
| <i>Alox15</i>   | arachidonate 15-lipoxygenase                                         | NM_031010                                   | -1,35 | ossification                                                          |
| <i>Ppargc1b</i> | peroxisome proliferator-activated receptor gamma, coactivator 1 beta | NM_176075                                   | -1,35 | transcription                                                         |
| <i>Znf536</i>   | zinc finger protein 536                                              | XM_001077206 /// XM_218522                  | -1,35 |                                                                       |
| <i>Atg9a</i>    | ATG9 autophagy related 9 homolog A (S. cerevisiae)                   | NM_001014218                                | -1,35 | autophagic vacuole assembly                                           |
| <i>Epas1</i>    | endothelial PAS domain protein 1                                     | NM_023090                                   | -1,35 | angiogenesis                                                          |
| <i>Eprs</i>     | glutamyl-prolyl-tRNA synthetase                                      | NM_001024238                                | -1,35 | translation                                                           |
| <i>Ap3m1</i>    | adaptor-related protein complex 3, mu 1 subunit                      | NM_133593                                   | -1,35 | transport                                                             |
| <i>Zyx</i>      | zyxin                                                                | NM_053761                                   | -1,35 | regulation of inflammatory response                                   |
| <i>Ggct</i>     | gamma-glutamyl cyclotransferase                                      | NM_001108629                                | -1,35 |                                                                       |
| <i>Fhdc1</i>    | FH2 domain containing 1                                              | NM_001106437                                | -1,35 | cellular component organization                                       |
| <i>Myl9</i>     | myosin, light chain 9, regulatory                                    | NM_001100885                                | -1,35 | muscle contraction                                                    |
| <i>Rab27a</i>   | RAB27A, member RAS oncogene family                                   | NM_017317                                   | -1,34 | protein targeting                                                     |
| <i>Hyou1</i>    | hypoxia up-regulated 1                                               | NM_001034028 /// NM_138867                  | -1,34 | response to hypoxia                                                   |
| <i>Atf5</i>     | activating transcription factor 5                                    | NM_172336                                   | -1,34 | transcription                                                         |
| <i>Hcfc2</i>    | host cell factor C2                                                  | NM_001008357                                | -1,34 |                                                                       |
| <i>Tram1</i>    | translocation associated membrane protein 1                          | NM_001007701                                | -1,34 | transport                                                             |
| <i>Ln timer</i> | ligand of numb-protein X 2                                           | NM_001108329                                | -1,34 | protein homooligomerization                                           |
| <i>Nos1ap</i>   | nitric oxide synthase 1 (neuronal) adaptor protein                   | NM_138922                                   | -1,34 | neurotransmitter secretion                                            |
| <i>Umps</i>     | uridine monophosphate synthetase                                     | NM_001025402                                | -1,34 | 'de novo' pyrimidine base biosynthetic process                        |

|                                 |                                                                                  |                                                                               |       |                                                                       |
|---------------------------------|----------------------------------------------------------------------------------|-------------------------------------------------------------------------------|-------|-----------------------------------------------------------------------|
| <i>Dgka</i>                     | diacylglycerol kinase, alpha                                                     | NM_080787                                                                     | -1,34 | activation of protein kinase C activity by G-protein coupled receptor |
| <i>Ehd4</i>                     | EH-domain containing 4                                                           | NM_139324                                                                     | -1,34 | pinocytosis                                                           |
| <i>Trabd</i>                    | TraB domain containing                                                           | NM_001106788                                                                  | -1,33 |                                                                       |
| <i>Prdx4</i>                    | peroxiredoxin 4                                                                  | NM_053512                                                                     | -1,33 | cell redox homeostasis                                                |
| <i>Fig4</i>                     | FIG4 homolog (S. cerevisiae)                                                     | NM_001047096                                                                  | -1,33 | vacuole organization                                                  |
| <i>Ipo4</i>                     | importin 4                                                                       | NM_001106038                                                                  | -1,33 | intracellular protein transport                                       |
| <i>Ddx19a</i> /// <i>Ddx19b</i> | DEAD (Asp-Glu-Ala-Asp) box polypeptide 19a /// DEAD (Asp-Glu-Ala-As) box polypep | NM_001005381 /// NM_001005895 /// XM_001075251 /// XM_002725392               | -1,32 | induction of apoptosis                                                |
| <i>Psmc5</i>                    | proteasome (prosome, macropain) 26S subunit, non-ATPase, 5                       | NM_001106569                                                                  | -1,32 | anaphase-promoting complex-dependent proteasomal ubiquitin-dependent  |
| <i>Mxra8</i>                    | matrix-remodelling associated 8                                                  | NM_001007002                                                                  | -1,32 |                                                                       |
| <i>Necab3</i>                   | N-terminal EF-hand calcium binding protein 3                                     | NM_001098724                                                                  | -1,32 | antibiotic biosynthetic process                                       |
| <i>Ccdc28b</i>                  | coiled coil domain containing 28B                                                | NM_001134689                                                                  | -1,32 |                                                                       |
| <i>Mier2</i>                    | mesoderm induction early response 1, family member 2                             | NM_001108737                                                                  | -1,32 |                                                                       |
| <i>Slc20a2</i>                  | solute carrier family 20 (phosphate transporter), member 2                       | NM_017223                                                                     | -1,32 | transport                                                             |
| <i>Tmem57</i>                   | transmembrane protein 57                                                         | NM_001025699                                                                  | -1,31 |                                                                       |
| <i>Pdp2</i>                     | pyruvate dehydrogenase phosphatase catalytic subunit 2                           | NM_145091                                                                     | -1,31 | protein dephosphorylation                                             |
| <i>Fam101b</i>                  | family with sequence similarity 101, member B                                    | NM_001007611                                                                  | -1,31 |                                                                       |
| <i>Galnt1</i>                   | UDP-N-acetyl-alpha-D-galactosamine:polypeptide N-acetylgalactosaminyltransferase | NM_024373                                                                     | -1,31 | protein O-linked glycosylation                                        |
| <i>Ctdspl</i>                   | CTD (carboxy-terminal domain, RNA polymerase II, polypeptide A) small phosphatas | NM_001106865                                                                  | -1,31 |                                                                       |
| <i>Cdc42bpa</i>                 | CDC42 binding protein kinase alpha                                               | NM_053657                                                                     | -1,31 | microtubule cytoskeleton organization                                 |
| <i>Arfgap1</i>                  | ADP-ribosylation factor GTPase activating protein 1                              | NM_145090                                                                     | -1,31 | transport                                                             |
| <i>Tmem164</i>                  | transmembrane protein 164                                                        | NM_001109014                                                                  | -1,31 |                                                                       |
| <i>Dopey2</i>                   | dopey family member 2                                                            | NM_001191660 /// XM_001055500 /// XM_002724703 /// XM_002727866 /// XM_221640 | -1,30 |                                                                       |
| <i>Batf3</i>                    | basic leucine zipper transcription factor, ATF-like 3                            | NM_021865                                                                     | -1,30 | transcription                                                         |
| <i>Dad1</i>                     | defender against cell death 1                                                    | NM_138910                                                                     | -1,30 | blastocyst development                                                |
| <i>Diaph1</i>                   | Diaphanous homolog 1 (Drosophila)                                                | NM_001107393                                                                  | -1,30 | cellular component organization                                       |
| <i>Fam20c</i>                   | family with sequence similarity 20, member C                                     | NM_001012238                                                                  | -1,30 |                                                                       |

\* P value = 0.029, was obtained by permutation analysis. Fold change  $\geq 1.3$ .

Supplemental table 3: List of genes regulated by aging, classified by biological functions

A- Anterior Pituitary

| Category                               | # of genes | P value           | Genes                                                                                                                                                                                                                                                                                                                                                                                                                                                                                                                                                                                                                                                                                                                                                                                                                                                                                                                                                                                                                                                                                                                                                                                                                                                                                                                                                    |
|----------------------------------------|------------|-------------------|----------------------------------------------------------------------------------------------------------------------------------------------------------------------------------------------------------------------------------------------------------------------------------------------------------------------------------------------------------------------------------------------------------------------------------------------------------------------------------------------------------------------------------------------------------------------------------------------------------------------------------------------------------------------------------------------------------------------------------------------------------------------------------------------------------------------------------------------------------------------------------------------------------------------------------------------------------------------------------------------------------------------------------------------------------------------------------------------------------------------------------------------------------------------------------------------------------------------------------------------------------------------------------------------------------------------------------------------------------|
| Cell Death                             | 186        | 1,84E-04-2,32E-02 | <i>Ier3, Gstm5, Rassf6, Clns1a, Ascl1, Ptpkr, Cdc42bpa, Gstp1, Calcr, Prkcz, Tradd, Bcap29, Ace, Cdh1, Camk1g, Igf2, Cdkn1c, Adamts14, Pmp22, Fcgr2a, Itsn1, Ccl11, Appb1, Plscr3, Spp, Ctnnb1, Nol3, Alox15, Soat1, Igfbp1, Adipoq, Pcsk2, Atrx, Exoc2, Chka, Rtn, Cadm1, Lgals3bp, Ehd4, Rgs5, Grb10, Id3, Htra1, Zyx, Inpp1, Fgl2, Meis1, Ryr2, Stmn1, Gpc3, Plat, Sqstm1, Sh3bgrl3, L1cam, Stxbp1, Blcap, Lyz1/Lyz2, Hes1, Snca, Grik2, Gabrg2, Dpp3, Ephx1, Igfbp7, Tnfsf12, Cdkn2c, Xrcc5, Vtn, F2r, Abcc3, Tpp1, Cd82, Sli2, Epor, Camk2b, Gfra3, Ccnd1, Gsdma, Dad1, Snn, Prdm2, Atp6ap2, Jun, Ddx19a, Gria4, Ctbp2, Cdc1, Capn1, Ap2a2, Ddx41, Gpx2, Pdyn, Reg3g, Kitlg, Sh3kbp1, Aldh1a2, Tubb3, Lgals1, Traf3ip2, Sstr3, Ccnd2, Pnpt1, Klk1, Cables1, Htatip2, Cast, Pcgf2, Six1, Gabrd, Glrx, Fos, Pcnal, Krt18, Prkcz, Cebpd, Cadps2, Ddx20, Nckap11, Vegfa, Hspb8, Map2k6, Ccl13, Mtmr1, Dgkz, C1qa, Gpx4, Nek7, Ndn, Ednra, Sox4, Aatk, Apoe, S100a6, Banf1, Gpm6a, Xdh, Tgfb1, Plcg2, Camk2n1, Aif1, Igfbp3, Copb2, Ivns1abp, Rab25, Mx1, Camk2d, Rps6ka1, Sstr2, Rasd1, Id2, Ctss, Vipr2, Dsp, Agtr1b, Igf1, St6gal1, Anxa4, Tspo, Tmem57, Map2k3, Dgka, Eef2k, Ptgr1, Abcc5, Epas1, Ptpzr1, Rnd3, Aqp1, Cd74, Xpa, Hyou1, Ngb, Col2a1, Dlk1, Rab27a, Hbxip, Hla-Drb1, Amigo2, Timp2, Rgs10, Setd8, Snca, Ntrk2, Atf5, Isg20, Atp5s</i> |
| Cellular Growth and Proliferation      | 127        | 1,93E-04-2,32E-02 | <i>Ier3, Ctdspl, Ltp4, Rem2, Ascl1, Calcr, Gstp1, Prkcz, Igf2, Cd151, Cdkn1c, Pmp22, Dgkz, Ptp4a3, Lepre1, Ccl11, Appb1, Degs1, Spp1, Alox15, Igfbp1, Adipoq, Chka, Cadm1, Grb10, Id3, Htra1, Zyx, Meis1, Stmn1, Gpc3, Plat, Coro1a, Gfm1, Col1a1, Gltsr2, Etv1, Hes1, Myl9, Flot1, Igfbp7, Tnfsf12, Agtrap, Cdkn2c, Xrcc5, Vtn, F2r, Cd82, Epor, Sli2, Smyd4, Scn5a, Ccnd1, Mltf6, Pold4, Jun, Cdc1, Capn1, Rbbp9, Kitlg, Aldh1a2, Tubb3, Lgals1, Tusc2, Ccnd2, Pnpt1, Cables1, Cast, Six1, Pcgf2, Fos, C20orf191, Eif5a2, Ltp4, Cebpd, Vegfa, Hspb8, Map2k6, Ccl13, Nubp1, Gpx4, Ndn, Ednra, Rtn4r, Apoe, Nfix, Ptpn3, Xdh, Bin3, Camk2n1, Aif1, Igfbp3, Ivns1abp, Mx1, Fshb, Rps6ka1, Sstr2, Id2, Rasd1, Ctss, Hopx, Dsp, Rbp4, Igf1, Map2k3, Dgka, Kcnk10, Eef2k, Igh2, Abcc5, Epas1, Aqp1, Tob1, Cd74, Xpa, Diaph1, Vldlr, Col2a1, Dlk1, Steap2, Prdx4, Gga2, Ttpi, Cirbp, Timp2, Atf5, Ntrk2</i>                                                                                                                                                                                                                                                                                                                                                                                                                                                   |
| Cellular Function and Maintenance      | 117        | 4,85E-04-2,27E-02 | <i>Cdc42bpa, Prkcz, Igf2, Scnn1g, Cadps, Cd151, Dgkz, Fcgr2a, Itsn1, Ccl11, Plscr3, Nol3, Spp1, Alox15, Adipoq, Slc2a4, Exoc2, Dopey2, Id3, Ryr2, Stmn1, Coro1a, Sqstm1, Plat, Nefh, L1cam, Stxbp1, Klk1, Ttyh1, Snca, Grik2, Evi, Gabrg2, Krt25, Pex5l, Xrcc5, Vtn, F2r, Tpp1, Rab3c, Abcc3, Stmn2, Cd82, Epor, Sli2, Scn5a, Ccnd1, Tapbp, Capn1, Ap2a2, Rab3d, Atg9a, Mark1, Kitlg, Tesc, Tubb3, Lgals1, Cdk5rap2, Pcgf2, Cast, Tnr, Kctd13, Krt18, Prkcz, Cadps2, Nckap11, Vegfa, Hspb8, Ccl13, Slc20a2, C1qa, Nubp1, Ndn, Nlgn3, Kcnj11, Rtn4r, Sox4, Apoe, Aatk, Cnih2, Xdh, Hla-Qa1, Gpm6a, Plcg2, Copb2, Rab2b, Camk2d, Aplp2, Id2, Ctss, Dsp, Rbp4, Igf1, Fcgrt, Gabra1, Dgka, Eef2k, Trim54, Arsb, Epas1, Ptpzr1, Rnd3, Aqp1, Lrrc23, Fam101b, Cd74, Diaph1, Slc16a1, Slc12a5, Rab27a, Plxna3, Steap2, Atf1, Cyth2, Exoc7, Ntrk2, Syne1</i>                                                                                                                                                                                                                                                                                                                                                                                                                                                                                                     |
| Cellular Assembly and Organization     | 82         | 6,59E-04-2,47E-02 | <i>Mark1, Kitlg, Tubb3, Ascl1, Cdc42bpa, Cdk5rap2, Cast, Prkcz, Tnr, Igf2, Cadps, Kctd13, Krt18, Prkcz, Pmp22, Fcgr2a, Cadps2, Ptp4a3, Lppr5, Nckap11, Ccl11, Vegfa, Spp1, Gphn, Nol3, Adipoq, Ccl13, C1qa, Ndn, Nlgn3, Dopey2, Rtn4r, Ehd4, Aatk, Apoe, Gpm6a, Plcg2, Igfbp3, Copb2, Stmn1, Sqstm1, Coro1a, Plat, Nefh, L1cam, Ctss, Klk1, Ttyh1, Snca, Dsp, Igf1, Mtmr2, Evi, Krt25, Trim54, Amigo1, Vtn, Arsb, Epas1, F2r, Ptpzr1, Tpp1, Stmn2, Rab3c, Rnd3, Aqp1, Cd82, Sli2, Fam101b, Cd74, Diaph1, Rab27a, Plxna3, Atf1, Gga2, Cyth2, Exoc7, Snca, Ntrk2, Rab3d, Lrrc4c, Syne1</i>                                                                                                                                                                                                                                                                                                                                                                                                                                                                                                                                                                                                                                                                                                                                                                 |
| Cellular Development                   | 79         | 1,93E-04-2,47E-02 | <i>Ier3, Kitlg, Tubb3, Aldh1a2, Lgals1, Rem2, Ascl1, Tusc2, Ccnd2, Pnpt1, Calcr, Six1, Cast, Prkcz, Ace, Igf2, Fos, Cd151, Cdkn1c, Cebpd, Dgkz, Pmp22, Fcgr2a, Ptp4a3, Cadps2, Ccl11, Vegfa, Degs1, Hspb8, Spp1, Alox15, Map2k6, Ccl13, Adipoq, Lhb, Pcsk2, Chka, Fig4, Ndn, Cadm1, Apoe, Id3, Plcg2, Aif1, Igfbp3, Ivns1abp, Stmn1, Grb14, Plat, Sqstm1, Col1a1, L1cam, Rasd1, Id2, Hes1, Hopx, Igf1, Vwc2, Map2k3, Dgka, Tnfsf12, Trim54, Abcc5, F2r, Epor, Smyd4, Gfra3, Ccnd1, Mltf6, Vldlr, Tapbp, Pold4, Dlk1, Steap2, Jun, Ttpi, Cdc1, Timp2, Ntrk2</i>                                                                                                                                                                                                                                                                                                                                                                                                                                                                                                                                                                                                                                                                                                                                                                                           |
| Cell-To-Cell Signaling and Interaction | 76         | 3,75E-04-2,47E-02 | <i>Kitlg, Mltf4, Lgals1, Ascl1, Ccnd2, Cast, Prkcz, Gabrd, Tnr, Ace, Fos, Igf2, Cd151, Cdkn1c, Bcan, Pmp22, Fcgr2a, Ptp4a3, Grk6, Ccl11, Vegfa, Gphn, Spp1, Alox15, Adipoq, Ccl13, Syn2, Nlgn3, Cadm1, Lgals3bp, Apoe, Vangl1, Cnih2, Id3, Gpm6a, Xdh, Cspg5, Igfbp3, Bsn, Serping1, Gpc3, Plat, Col1a1, L1cam, Id2, Stxbp1, Hes1, Snca, Grik2, Agtr1b, Mtmr2, Igf1, St6gal1, Esm1, Nrxn1, Amigo3, Gabrg2, Kcnk10, Trim54, Agtrap, Vtn, Amigo1, F2r, Cd82, Sli2, Cd74, Ccnd1, Lamc2, Diaph1, Slc12a5, Col2a1, Gria4, Cdc1, Amigo2, Snca, Ntrk2</i>                                                                                                                                                                                                                                                                                                                                                                                                                                                                                                                                                                                                                                                                                                                                                                                                       |
| Cellular Movement                      | 72         | 8,97E-04-2,41E-02 | <i>Ier3, Kitlg, Lgals1, Hdllbp, C4b, Htatip2, Cast, Prkcz, Tnr, Igf2, Fos, Cd151, Prkcz, Bcan, Fcgr2a, Itsn1, Ptp4a3, Grk6, Nckap11, Ccl11, Vegfa, Batf3, Spp1, Igfbp1, Adipoq, Ccl13, Cfb, Ednra, Cadm1, Apoe, S100a6, Vangl1, Xdh, Nfix, Zyx, Igfbp3, Serping1, Stmn1, Mx1, Plat, Coro1a, Fshb, Col1a1, Aplp2, Sstr2, L1cam, Etv1, Id2, Ctss, Igf1, Esm1, Podxl2, Tnfsf12, Lmo4, Vtn, F2r, Epas1, Ptpzr1, Rnd3, Cd82, Sli2, Scn5a, Cd74, Ccnd1, Diaph1, Jun, Ctbp2, Capn1, Timp2, Cyth2, Ntrk2, Cldn7</i>                                                                                                                                                                                                                                                                                                                                                                                                                                                                                                                                                                                                                                                                                                                                                                                                                                              |
| Molecular Transport                    | 64         | 4,85E-04-2,3E-02  | <i>Kitlg, Lgals1, Calcr, Cast, Cpt1a, Prkcz, Fos, Igf2, Elovl5, Cadps, Pmp22, Fcgr2a, Cadps2, Itsn1, Grk6, Ccl11, Vegfa, Spp1, Alox15, Soat1, Ccl13, Adipoq, Slc2a4, Exoc2, Trhr, Ednra, Kcnj11, Apoe, Ppargc1b, Xdh, Plcg2, Rab2b, Ryr2, Aco2, Camk2d, L1cam, Sstr2, Stxbp1, Lyz1/Lyz2, Snca, Atp2b3, Agtr1b, Igf1, Fcgrt, Dgka, Igfbp7, Agtrap, Apod, Pex5l, F2r, Epas1, Rab3c, Pde6d, Epor, Hyou1, Vldlr, Abcc8, Dlk1, Pnpla2, Rab27a, Steap2, Acsl1, Exoc7, Rab3d</i>                                                                                                                                                                                                                                                                                                                                                                                                                                                                                                                                                                                                                                                                                                                                                                                                                                                                                |
| Small Molecule Biochemistry            | 53         | 4,85E-04-2,41E-02 | <i>Sh3kbp1, Kitlg, Plch2, Htatip2, Prkcz, Cpt1a, Igf2, Fos, Elovl5, Pex7, Fcgr2a, Ccl11, Vegfa, Spp1, Soat1, Alox15, Adipoq, Ccl13, Csgalnact1, Mtmr1, Slc2a4, Gpx4, Chka, Fig4, Ednra, Trhr, Apoe, Ppargc1b, Xdh, Csgalnact2, Plcg2, Aco2, Sstr2, Snca, Agtr1b, Mtmr2, Igf1, Dgka, Igfbp7, Agtrap, Apod, Ppap2b, Vtn, Epas1, F2r, Ptgr2, Cd74, Vldlr, Chpt1, Dlk1, Pnpla2, Ppapdc1b, Acsl1</i>                                                                                                                                                                                                                                                                                                                                                                                                                                                                                                                                                                                                                                                                                                                                                                                                                                                                                                                                                          |
| Cell Cycle                             | 50         | 2,2E-04-2,38E-02  | <i>Kitlg, Lgals1, Tusc2, Ccnd2, Pnpt1, Calcr, Cables1, Cast, Fos, Igf2, Tmpo, Cdkn1c, Cebpd, Dgkz, Appb1, Vegfa, Degs1, Rprm, Alox15, Adipoq, Map2k6, Chka, Apoe, Grb10, Id3, Camk2n1, Igfbp3, Ppap2c, Camk2d, Sstr2, Pola1, Id2, Hes1, Igf1, Map2k3, Igfbp7, Cdkn2c, Xrcc5, Epor, Camk2b, Ccnd1, Xpa, Babam1, Pold4, Jun, Camk1, Timp2, Ap2a2, Setd8, Atf5</i>                                                                                                                                                                                                                                                                                                                                                                                                                                                                                                                                                                                                                                                                                                                                                                                                                                                                                                                                                                                          |

|                                            |    |                   |                                                                                                                                                                                                                                                                                                                         |
|--------------------------------------------|----|-------------------|-------------------------------------------------------------------------------------------------------------------------------------------------------------------------------------------------------------------------------------------------------------------------------------------------------------------------|
| Lipid Metabolism                           | 44 | 2,71E-03-2,41E-02 | <i>Sh3kbp1, Kitlg, Acot2, Sstr2, Plch2, Snca, Cpt1a, Mtmr2, Igf1, Igf2, Elovl5, Igfbp7, Apod, Fcgr2a, Pex7, Vtn, Ppap2b, F2r, Epas1, Ccl11, Vegfa, Soat1, Ptgr2, Alox15, Adipoq, Ccl13, Cd74, Mtmr1, Slc2a4, Vldlr, Chpt1, Chka, Gpx4, Fig4, Trhr, Ednra, Dlk1, Pnpla2, Ppapdc1b, Apoe, Ppargc1b, Acs11, Xdh, Plcg2</i> |
| Cell Morphology                            | 35 | 2,25E-03-2,36E-02 | <i>Kitlg, Plat, Coro1a, L1cam, Snca, Cast, Tnr, Igf1, Evi, Krt18, Map2k3, Cdkn1c, Tnfrsf12, Pmp22, Fcgr2a, Vtn, Lppr5, F2r, Stmn2, Ccl11, Vegfa, Cd82, Slt2, Ccl13, Diaph1, Ndn, Nlgn3, Rtn4r, Jun, Apoe, Sncb, Rab3d, Xdh, Plcg2, Igfbp3</i>                                                                           |
| Cell Signaling                             | 31 | 1,25E-02-1,25E-02 | <i>Ryr2, Lgals1, Camk2d, L1cam, Lys1/Lyz2, Calcr, Cast, Atp2b3, Agtr1b, Igf1, Igf2, Fos, Igfbp7, Pmp22, Fcgr2a, Grk6, F2r, Ccl11, Pde6d, Vegfa, Epdr, Spp1, Ccl13, Hyou1, Abcc8, Trhr, Ednra, Kcnj11, Apoe, Xdh, Plcg2</i>                                                                                              |
| Vitamin and Mineral Metabolism             | 31 | 1,25E-02-1,25E-02 | <i>Ryr2, Lgals1, Camk2d, L1cam, Lys1/Lyz2, Calcr, Cast, Atp2b3, Agtr1b, Igf1, Igf2, Fos, Igfbp7, Pmp22, Fcgr2a, Grk6, F2r, Ccl11, Pde6d, Vegfa, Epdr, Spp1, Ccl13, Hyou1, Abcc8, Trhr, Ednra, Kcnj11, Apoe, Xdh, Plcg2</i>                                                                                              |
| Carbohydrate Metabolism                    | 28 | 4,85E-04-2,3E-02  | <i>Sh3kbp1, Plch2, Htatip2, Cpt1a, Prkcz, Agtr1b, Igf1, Mtmr2, Igf2, Dgka, Mfng, Fcgr2a, Vtn, Vegfa, Spp1, Alox15, Ccl13, Adipoq, Csgalnact1, Mtmr1, Slc2a4, Chpt1, Chka, Gpx4, Fig4, Trhr, Plcg2, Csgalnact2</i>                                                                                                       |
| Post-Translational Modification            | 22 | 2,52E-03-7,3E-03  | <i>Tpp1, Vegfa, Ltbp4, Plat, Bace2, Alox15, C4b, Pcsk2, Diaph1, Ctss, Cndp2, Wfdc2, Prkcz, Gpx4, Igf1, Ace, Apoe, Enpep, Dpp3, Capn1, Timp2, Xdh</i>                                                                                                                                                                    |
| Cellular Compromise                        | 20 | 5,84E-03-2,41E-02 | <i>Stmn2, Pdyn, Epdr, Spp1, Sqstm1, Plat, Adipoq, Plod1, Nefh, Snca, Six1, Igf1, Cadm1, Igf2, Apoe, Krt18, Acs11, Exoc7, Ntrk2, Xrcc5</i>                                                                                                                                                                               |
| Protein Degradation                        | 18 | 6,87E-03-6,87E-03 | <i>Tpp1, Ltbp4, Plat, Bace2, Alox15, C4b, Pcsk2, Diaph1, Cndp2, Ctss, Wfdc2, Ace, Igf1, Apoe, Enpep, Dpp3, Capn1, Timp2</i>                                                                                                                                                                                             |
| Protein Synthesis                          | 18 | 6,87E-03-6,87E-03 | <i>Tpp1, Ltbp4, Plat, Bace2, Alox15, C4b, Pcsk2, Diaph1, Cndp2, Ctss, Wfdc2, Ace, Igf1, Apoe, Enpep, Dpp3, Capn1, Timp2</i>                                                                                                                                                                                             |
| Antigen Presentation                       | 16 | 7,3E-03-2,36E-02  | <i>Epas1, Nckap11, Vegfa, Slt2, Spp1, Coro1a, Cd74, Ccl13, Adipoq, Ccnd1, Tnr, Ednra, Apoe, Cd151, Fcgr2a, Vtn</i>                                                                                                                                                                                                      |
| Drug Metabolism                            | 8  | 6,48E-04-7,07E-03 | <i>Gstm5, Glrx, Agtr1b, Fos, Xdh, Agtrap, Gstp1, Snca</i>                                                                                                                                                                                                                                                               |
| Gene Expression                            | 5  | 7,3E-03-2,27E-02  | <i>Jun, Ccnd1, Id3, Id2, Cdkn2c</i>                                                                                                                                                                                                                                                                                     |
| Protein Folding                            | 2  | 7,3E-03-7,3E-03   | <i>Prkcz, Vegfa</i>                                                                                                                                                                                                                                                                                                     |
| DNA Replication, Recombination, and Repair | 2  | 2,27E-02-2,27E-02 | <i>Pcna, Xrcc5</i>                                                                                                                                                                                                                                                                                                      |

## B- Hypothalamus

| Category                               | # of genes | P value           | Genes                                                                                                                                                                                                                                                                                                                                                                                                                                                                                                                                 |
|----------------------------------------|------------|-------------------|---------------------------------------------------------------------------------------------------------------------------------------------------------------------------------------------------------------------------------------------------------------------------------------------------------------------------------------------------------------------------------------------------------------------------------------------------------------------------------------------------------------------------------------|
| Cell Death                             | 78         | 7,08E-11-7,58E-03 | <i>Cd48, Calcb, Pdyn, S100a9, Kitlg, Uba7, Ccnd2, Gadd45b, Ndp, Cd38, Nts, Casp4, Ptpn6, Egr4, Timp4, Cd4, Sst, Ctse, Scd, Slc40a1, Alb, Fcgr3a, Fcgr2a, Gja1, Ghrh, Hla-C, Cfh, Mtmr1, Gsta1, C1qa, Hck, Gal, Sox4, C3, Bst2, Psmb8, Dcx, Acer2, Igfbp3, Aif1, Csf1r, Cd53, B2m, Wnt4, Ptprc, Dusp6, Col1a1, Zfp36, Hspb1, Fcgr2b, Dsp, Ednrb, Slc1a2, Anxa4, Tspo, Grm2, Nptx1, Ephx1, Pycard, F2r, Anxa11, Aqp1, Sp110, Icam1, Serpina3, Rac2, Fcer1g, Cidea, Irf9, Six4, Dlk1, Rras2, Rab27a, Tyrobp, Stat1, Hcrr1, Nlk, Blnk</i> |
| Cellular Growth and Proliferation      | 71         | 9,46E-08-7,26E-03 | <i>Cd48, Calcb, Kitlg, S100a9, Ccnd2, Gadd45b, Ndp, Cd38, Ptpn6, Nts, Egr4, Timp4, Sst, Cd4, Alb, Hmgcr, Clec7a, Gpnmb, Fcgr3a, Gja1, Ghrh, Psmb9, Fads2, Gbp2, Tmeff1, Hck, Sash3, Htr1a, Gal, Fads1, Sox4, C3, Bst2, Psmb8, Dcx, Acer2, Igfbp3, Aif1, Csf1r, B2m, Wnt4, Ptprc, Dusp6, Col1a1, Ifit3, Ube2l6, Ctss, Nrarp, Plagl1, Zfp36, Dsp, Fcgr2b, Ednrb, Slc1a2, Tspo, Lcp1, Cd37, Pycard, F2r, Anxa11, Aqp1, Icam1, Rac2, Fcer1g, Six4, Dlk1, Stat1, Tyrobp, Hcrr1, Cdh23, Blnk</i>                                            |
| Cell-To-Cell Signaling and Interaction | 57         | 1,54E-12-7,26E-03 | <i>Cd48, Calcb, Kitlg, S100a9, Mlt4, Ccnd2, C4b, Ndp, Cd38, Nts, Ptpn6, Plek, Slc1a6, Cd4, Sst, Clec7a, Fcgr2a, Fcgr3a, Gja1, Ghrh, Hla-C, Psmb9, Cfh, Sash3, Hck, C1qa, Htr1a, Tnfaiip82, Gal, Fzd2, Sv2b, Lgals3bp, C3, Bst2, Psmb8, Igfbp3, Csf1r, B2m, Wnt4, Ptprc, Ctss, Ube2l6, Fcgr2b, Slc1a2, Grm2, Lcp1, Nptx1, Pycard, F2r, Icam1, Rac2, Fcer1g, Rras2, Rab27a, Tyrobp, Stat1, Hcrr1</i>                                                                                                                                    |
| Small Molecule Biochemistry            | 57         | 5,37E-07-7,06E-03 | <i>Calcb, Kitlg, Mlt4, S100a9, C4b, Cd38, Npc2, Nts, Plek, Cyp4f8, Slc1a6, Cd4, Sst, Clec7a, Hmgcr, Alb, Scd, Fcgr2a, Ghrh, Cfh, Fads2, Gsta1, Htr1a, Cyp27a1, Fzd2, Gal, Fads1, C3, Acss2, Igfbp3, Aif1, Csf1r, B2m, Wnt4, Thrsp, Ptprc, Arhgdib, Ctss, Slc7a10, Fcgr2b, Ednrb, Slc1a2, Cyp2d6, Tspo, Grm2, Ephx1, Crym, F2r, Cyp51a1, Icam1, Pnlp, Fcer1g, Dlk1, Rab27a, Tyrobp, Stat1, Cp</i>                                                                                                                                      |
| Cellular Function and Maintenance      | 52         | 2,25E-07-7,74E-03 | <i>Calcb, Kitlg, S100a9, Cd38, Ptpn6, Nts, Plek, Cenpj, Slc1a6, Sst, Cd4, Alb, Clec7a, Slc40a1, Fcgr2a, Fcgr3a, Gja1, Ghrh, Hck, C1qa, Htr1a, Gal, Sox4, C3, Bst2, Anxa3, Dcx, Csf1r, B2m, Wnt4, Ptprc, Arhgdib, Iqgap1, Ctss, Nrarp, Hspb1, Fcgr2b, Dsp, Pygl, Ednrb, Grm2, Lcp1, Pycard, F2r, Aqp1, Icam1, Rac2, Fcer1g, Rras2, Stat1, Tyrobp, Cp</i>                                                                                                                                                                               |
| Cellular Development                   | 49         | 2,15E-06-7,26E-03 | <i>Calcb, Kitlg, Ccnd2, Gadd45b, Cd38, Ptpn6, Cd4, Sst, Ctse, Sept11, Alb, Scd, Clec7a, Fcgr2a, Gja1, Fads2, Fzd2, Sox4, C3, Dcx, Igfbp3, Csf1r, B2m, Wnt4, Ptprc, Plagl1, Nrarp, Zfp36, Fcgr2b, Dsp, C1qc, Slc1a2, Ednrb, Lcp1, Grxcr1, Cyp51a1, Icam1, Metrn, Rac2, Fcer1g, Dlk1, Rras2, Rab27a, Stat1, Tyrobp, Asb1, Cdh23, Nlk, Blnk</i>                                                                                                                                                                                          |
| Cell Signaling                         | 48         | 4,39E-08-7,72E-03 | <i>Cd48, Calcb, S100a9, Csf1r, Kitlg, B2m, Wnt4, Ptprc, C4b, Gadd45b, Cd38, Casp4, Nts, Hspb1, Zfp36, Ptpn6, Fcgr2b, Ednrb, Tspo, Grm2, Cd4, Sst, Clec7a, Alb, Fcgr3a, Fcgr2a, Pycard, F2r, Gja1, Ghrh, Icam1, Hla-C, Hck, Rac2, Htr1a, Fcer1g, Fzd2, Gal, Irf9, Tyrobp, Stat1, C3, Bst2, Wnk1, Nlk, Aif1, Blnk, Igfbp3</i>                                                                                                                                                                                                           |
| Cellular Movement                      | 47         | 1,97E-10-7,26E-03 | <i>Cd48, Kitlg, Csf1r, S100a9, Ptprc, Iqgap1, Arhgdib, C4b, Col1a1, Ndp, Ctss, Cd38, Ptpn6, Nts, Fcgr2b, Slc1a2, Ednrb, Tspo, Lcp1, Nptx1, Sst, Cd4, Ctse, C2, Hmgcr, Alb, Fcgr3a, Fcgr2a, Pycard, F2r, Gja1, Aqp1, Icam1, Cfh, Serpina3, Hck, Rac2, Fcer1g, Six4, Rras2, Tyrobp, Stat1, C3, Anxa3, Dcx, Igfbp3, Aif1</i>                                                                                                                                                                                                             |
| Molecular Transport                    | 47         | 4,39E-08-7,72E-03 | <i>Calcb, Csf1r, Kitlg, S100a9, B2m, Wnt4, Ptprc, C4b, Ctss, Cd38, Slc7a10, Ptpn6, Nts, Fcgr2b, Ednrb, Slc1a2, Grm2, Sst, Cd4, Crym, Slc40a1, Scd, Hmgcr, Alb, Clec7a, Fcgr3a, Fcgr2a, F2r, Ghrh, Icam1, Hla-C, Cfh, Fads2, Gsta1, Hck, Rac2, Htr1a, Cyp27a1, Fcer1g, Fzd2, Gal, Dlk1, Rab27a, Tyrobp, Cp, C3, Blnk</i>                                                                                                                                                                                                               |

|                                    |    |                   |                                                                                                                                                                                                                                                      |
|------------------------------------|----|-------------------|------------------------------------------------------------------------------------------------------------------------------------------------------------------------------------------------------------------------------------------------------|
| Vitamin and Mineral Metabolism     | 37 | 4,39E-08-7,72E-03 | <i>Calcb, Csf1r, Kitlg, S100a9, B2m, Wnt4, Ptprc, C4b, Cd38, Nts, Ptpn6, Fcgr2b, Ednrb, Tspo, Grm2, Sst, Cd4, Scd, Hmgcr, Alb, Clec7a, Fcgr3a, Fcgr2a, F2r, Cyp51a1, Ghrh, Hla-C, Icam1, Hck, Rac2, Htr1a, Cyp27a1, Fcer1g, Fzd2, Gal, C3, Blink</i> |
| Lipid Metabolism                   | 35 | 3E-05-7,06E-03    | <i>Kitlg, Csf1r, Wnt4, Thrsp, Ctss, Cd38, Nts, Npc2, Fcgr2b, Slc1a2, Cyp2d6, Cyp4f8, Ednrb, Tspo, Cd4, Ephx1, Alb, Hmgcr, Clec7a, Scd, Fcgr2a, F2r, Cyp51a1, Ghrh, Icam1, Fads2, Gsta1, Pnlip, Fcer1g, Cyp27a1, Gal, Dlk1, Fads1, C3, Acss2</i>      |
| Antigen Presentation               | 31 | 1,36E-07-7,06E-03 | <i>Cd48, Csf1r, Kitlg, S100a9, Ptprc, C4b, Ube2l6, Ctss, Cd38, Ptpn6, Fcgr2b, Ednrb, Cd4, Ctse, Clec7a, Fcgr2a, F2r, Icam1, Hla-C, Psmb9, Cfh, Serpina3, C1qa, Rac2, Hck, Fcer1g, Rab27a, Stat1, Tyrobp, C3, Psmb8</i>                               |
| Post-Translational Modification    | 22 | 1,2E-06-1,73E-04  | <i>F2r, Cd48, Csf1r, Kitlg, Ptprc, Dusp6, Ccnd2, Hck, Fcer1g, Ptpn6, Phkg1, Fcgr2b, Ednrb, Cp, Tyrobp, Cd4, Wnk1, Alb, Fcgr2a, Nlk, Igfbp3, Aif1</i>                                                                                                 |
| Cellular Assembly and Organization | 22 | 8,78E-04-7,74E-03 | <i>F2r, Gja1, S100a9, Aqp1, Csf1r, Kitlg, Icam1, Arhgdib, Iqgap1, Pls1, Rac2, C1qa, Ctss, Htr1a, Dsp, Gal, Plek, Cenpj, Lcp1, Bst2, Dcx, Fcgr2a</i>                                                                                                  |
| Cell Morphology                    | 22 | 1,34E-03-7,26E-03 | <i>F2r, Kitlg, S100a9, Ghrh, B2m, Icam1, Hck, Hspb1, Ptpn6, Nts, Dsp, Plek, Dlk1, Ednrb, Grm2, Bst2, Sst, Cd4, Fcgr2a, Pycard, Blink, Igfbp3</i>                                                                                                     |
| Cellular Compromise                | 21 | 5,61E-08-6,41E-03 | <i>Gja1, Kitlg, S100a9, Icam1, Wnt4, Cfh, Ptprc, C4b, Hck, Rac2, Cd38, Fcer1g, Fcgr2b, Rab27a, Tyrobp, Cd4, Bst2, C3, Anxa3, Alb, Fcgr2a</i>                                                                                                         |
| Carbohydrate Metabolism            | 19 | 2,26E-04-5,8E-03  | <i>F2r, Kitlg, Csf1r, Icam1, Ptprc, Dusp6, Htr1a, Cd38, Fcer1g, Nts, Phkg1, Fcgr2b, Plek, Pygl, Gal, Dlk1, Scd, Fcgr2a, Igfbp3</i>                                                                                                                   |
| Nucleic Acid Metabolism            | 14 | 1E-03-5,86E-03    | <i>F2r, Calcb, Mlt4, Ghrh, Icam1, Cfh, Ptprc, Arhgdib, Htr1a, Nts, Gal, Grm2, Cd4, Sst</i>                                                                                                                                                           |
| Free Radical Scavenging            | 13 | 1,59E-03-2,37E-03 | <i>F2r, Pdyn, Icam1, Cfh, Arhgdib, Iqgap1, Hck, Rac2, Hspb1, Ptpn6, Fcer1g, Alb, Fcgr2a</i>                                                                                                                                                          |
| Amino Acid Metabolism              | 9  | 1,73E-04-3,48E-03 | <i>Nts, Ednrb, Slc1a2, Cp, Slc1a6, Sst, Crym, Alb, Slc7a10</i>                                                                                                                                                                                       |
| Cell Cycle                         | 8  | 5,15E-04-5,23E-03 | <i>Fcgr2b, Kitlg, Stat1, Cd37, Col1a1, Fcgr2a, Blink, Cd38</i>                                                                                                                                                                                       |
| Protein Trafficking                | 3  | 5,23E-03-5,23E-03 | <i>Ednrb, Icam1, C3</i>                                                                                                                                                                                                                              |
| Energy Production                  | 2  | 1,73E-04-1,73E-04 | <i>Cp, Alb</i>                                                                                                                                                                                                                                       |
| Drug Metabolism                    | 2  | 5,15E-04-5,15E-04 | <i>Cyp2d6, Alb</i>                                                                                                                                                                                                                                   |

**Supplemental table 4: List of canonical pathways significantly represented by genes regulated with aging**

**A- Anterior Pituitary**

| <b>Ingenuity Canonical Pathways</b>               | <b>-log(p-value)</b> | <b>Ratio</b> | <b>Genes</b>                                                                                                                                           |
|---------------------------------------------------|----------------------|--------------|--------------------------------------------------------------------------------------------------------------------------------------------------------|
| Complement System                                 | 2,48                 | 0,188        | <i>C1qc, Serping1, C4b, C1qb, C1qa, Cfb</i>                                                                                                            |
| Antigen Presentation Pathway                      | 2,30                 | 0,179        | <i>Hla-Drb1, Cd74, Hla-Dqa1, Hla-Dra, Tapbp</i>                                                                                                        |
| Chemokine Signaling                               | 2,85                 | 0,147        | <i>Ccl11, Camk1g, Fos, Jun, Camk2b, Camk1, Ccl13, Camk2d, Calm1, Plcg2</i>                                                                             |
| Glutathione Metabolism                            | 2,12                 | 0,137        | <i>Gpx4, Glrx, Gpx2, Gstm5, Ggct, Gstm1, Gstm2</i>                                                                                                     |
| Growth Hormone Signaling                          | 2,59                 | 0,134        | <i>Prkcz, Igf1, Igf2, Fos, Prkcg, Slc2a4, Rps6ka1, Plcg2, Igfbp3</i>                                                                                   |
| Melatonin Signaling                               | 2,40                 | 0,132        | <i>Prkcz, Camk2b, Map2k3, Map2k6, Prkcg, Camk2d, Calm1, Plch2, Plcg2</i>                                                                               |
| Glioma Signaling                                  | 3,02                 | 0,122        | <i>Prkcz, Camk1g, Igf1, Igf2, Camk2b, Camk1, Ccnd1, Prkcg, Camk2d, Calm1, Cdkn2c, Plcg2</i>                                                            |
| Neuropathic Pain Signaling In Dorsal Horn Neurons | 2,55                 | 0,118        | <i>Prkcz, Kcnq2, Camk1g, Fos, Camk2b, Camk1, Gria4, Prkcg, Camk2d, Plch2, Ntrk2, Plcg2</i>                                                             |
| B Cell Development                                | 1,52                 | 0,115        | <i>Hla-Drb1, Hla-Dqa1, Hla-Dra</i>                                                                                                                     |
| Calcium-induced T Lymphocyte Apoptosis            | 1,42                 | 0,107        | <i>Prkcz, Hla-Drb1, Prkcg, Calm1, Hla-Dqa1, Hla-Dra</i>                                                                                                |
| Aryl Hydrocarbon Receptor Signaling               | 2,49                 | 0,102        | <i>Aldh18a1, Gstm5, Hspb7, Aldh1a2, Ccnd1, Ccnd2, Aldh16a1, Pola1, Gstm1, Aldh1l2, Aip, Fos, Jun, Nfix</i>                                             |
| Glycerolipid Metabolism                           | 1,70                 | 0,099        | <i>Ppap2c, Pnpla2, Aldh1a2, Ppapdc1b, Dgka, Adh5, Dgkb, Dgkz, Ppap2b</i>                                                                               |
| Phospholipid Degradation                          | 1,77                 | 0,099        | <i>Ppap2c, Ppapdc1b, Dgka, Dgkb, Plch2, Dgkz, Plcg2, Ppap2b</i>                                                                                        |
| Cdc42 Signaling                                   | 2,41                 | 0,092        | <i>Prkcz, Apc2, Myl9, Fos, Jun, Hla-Drb1, Cdc42bpa, Exoc7, Hla-Dqa1, Diaph1, Hla-Dra, Exoc2</i>                                                        |
| 14-3-3-mediated Signaling                         | 1,57                 | 0,090        | <i>Prkcz, Tubb3, Fos, Jun, Tubb6, Prkcg, Rps6ka1, Plch2, Plcg2, Snca</i>                                                                               |
| Glycerophospholipid Metabolism                    | 1,55                 | 0,084        | <i>Chka, Ppap2c, Ppapdc1b, Dgka, Dgkb, Plch2, Dgkz, Plcg2, Chpt1, Ppap2b</i>                                                                           |
| p38 MAPK Signaling                                | 1,30                 | 0,081        | <i>Tradd, Hspb7, Mapkapk3, H3f3c, Map2k3, Map2k6, Eef2k, Mapkapk5</i>                                                                                  |
| PKCθ Signaling in T Lymphocytes                   | 1,41                 | 0,074        | <i>Fos, Jun, Hla-Drb1, Camk2b, Prkcg, Camk2d, Hla-Dqa1, Plcg2, Hla-Dra</i>                                                                             |
| Xenobiotic Metabolism Signaling                   | 1,90                 | 0,074        | <i>Aldh18a1, Ces1c, Abcc3, Gstm5, Aldh1a2, Camk2b, Map2k6, Aldh16a1, Camk2d, Ppm1j, Gstm1, Prkcz, Aldh1l2, Aip, Camk1g, Camk1, Map2k3, Prkcg, Fmo5</i> |

**B- Hypothalamus**

| <b>Ingenuity Canonical Pathways</b>                 | <b>-log(p-value)</b> | <b>Ratio</b> | <b>Molecules</b>                                                                |
|-----------------------------------------------------|----------------------|--------------|---------------------------------------------------------------------------------|
| Complement System                                   | 7,01                 | 0,22         | <i>C1QC, CFH, C3, C4B, C2, C1QB, C1QA</i>                                       |
| Antigen Presentation Pathway                        | 4,98                 | 0,18         | <i>B2m, Hla-C, Psmb9, Psmb8, Tap2</i>                                           |
| Lipid Antigen Presentation by CD1                   | 2,06                 | 0,15         | <i>Fcer1g, B2m</i>                                                              |
| Interferon Signaling                                | 3,46                 | 0,14         | <i>Irf9, Stat1, Psmb8, Ifit3</i>                                                |
| Primary Immunodeficiency Signaling                  | 3,46                 | 0,10         | <i>Cd4, Ptprc, Tap2, Blnk</i>                                                   |
| Role of JAK1, JAK2 and TYK2 in Interferon Signaling | 1,59                 | 0,09         | <i>Ptpn6, Stat1</i>                                                             |
| Natural Killer Cell Signaling                       | 4,13                 | 0,08         | <i>Fcer1g, Ptpn6, Rras2, Tyrobp, Fcgr3a, Fcgr2a, Rac2</i>                       |
| Dendritic Cell Maturation                           | 5,76                 | 0,07         | <i>Fcer1g, Fcgr2b, B2m, Hla-C, Stat1, Tyrobp, Icam1, Col1a1, Fcgr3a, Fcgr2a</i> |
| Linoleic Acid Metabolism                            | 3,08                 | 0,07         | <i>Cyp51a1, Fads1, Cyp2d6, Cyp4f8, Fads2</i>                                    |

|                                                                              |      |      |                                                            |
|------------------------------------------------------------------------------|------|------|------------------------------------------------------------|
| Role of Pattern Recognition Receptors in Recognition of Bacteria and Viruses | 3,11 | 0,07 | <i>C1qc,C3,C1qb,Clec7a,C1qa</i>                            |
| OX40 Signaling Pathway                                                       | 2,69 | 0,07 | <i>Fcer1g,B2m,Hla-C,Cd4</i>                                |
| Allograft Rejection Signaling                                                | 2,11 | 0,06 | <i>Fcer1g,B2m,Hla-C</i>                                    |
| Autoimmune Thyroid Disease Signaling                                         | 1,31 | 0,06 | <i>Fcer1g,Hla-C</i>                                        |
| Communication between Innate and Adaptive Immune Cells                       | 2,44 | 0,06 | <i>Fcer1g,B2m,Hla-C,Cd4</i>                                |
| TREM1 Signaling                                                              | 1,93 | 0,06 | <i>Fcgr2b,Tyrobp,Icam1</i>                                 |
| FcγRIIB Signaling in B Lymphocytes                                           | 1,93 | 0,06 | <i>Fcgr2b,Rras2,Blnk</i>                                   |
| Cytotoxic T Lymphocyte-mediated Apoptosis of Target Cells                    | 1,93 | 0,06 | <i>Fcer1g,B2m,Hla-C</i>                                    |
| Activation of IRF by Cytosolic Pattern Recognition Receptors                 | 1,62 | 0,06 | <i>Irf9,Stat1,Ift2</i>                                     |
| Caveolar-mediated Endocytosis Signaling                                      | 2,12 | 0,06 | <i>Cd48,B2m,Hla-C,Alb</i>                                  |
| Glioma Invasiveness Signaling                                                | 1,60 | 0,06 | <i>F2r,Rras2,Timp4</i>                                     |
| Glutamate Receptor Signaling                                                 | 1,49 | 0,05 | <i>Slc1a2,Grm2,Slc1a6</i>                                  |
| B Cell Receptor Signaling                                                    | 2,98 | 0,05 | <i>Ptpn6,Fcgr2b,Rras2,Ptpnc,Fcgr2a,Rac2,Blnk</i>           |
| JAK/Stat Signaling                                                           | 1,44 | 0,05 | <i>Ptpn6,Rras2,Stat1</i>                                   |
| GM-CSF Signaling                                                             | 1,42 | 0,05 | <i>Rras2,Stat1,Hck</i>                                     |
| Virus Entry via Endocytic Pathways                                           | 1,78 | 0,05 | <i>Rras2,B2m,Hla-C,Rac2</i>                                |
| Systemic Lupus Erythematosus Signaling                                       | 3,47 | 0,05 | <i>Fcer1g,Ptpn6,Fcgr2b,Rras2,Hla-C,Ptpnc,Fcgr3a,Fcgr2a</i> |
| Role of JAK1 and JAK3 in γc Cytokine Signaling                               | 1,51 | 0,05 | <i>Rras2,Stat1,Blnk</i>                                    |
| Antiproliferative Role of Somatostatin Receptor 2                            | 1,42 | 0,05 | <i>Ptpn6,Rras2,Sst</i>                                     |
| Fcγ Receptor-mediated Phagocytosis in Macrophages and Monocytes              | 1,65 | 0,05 | <i>Fcgr3a,Fcgr2a,Hck,Rac2</i>                              |
| Growth Hormone Signaling                                                     | 1,37 | 0,04 | <i>Ptpn6,Stat1,Igf1bp3</i>                                 |
| LXR/RXR Activation                                                           | 2,04 | 0,04 | <i>C3,C4B (Includes Others),HMGCR,ALB,SCD</i>              |
| Acute Phase Response Signaling                                               | 2,46 | 0,04 | <i>Rras2,Cp,C3,Serpina3,C4b,Alb</i>                        |
| Role of NFAT in Regulation of the Immune Response                            | 2,61 | 0,04 | <i>Fcer1g,Fcgr2b,Rras2,Cd4,Fcgr3a,Fcgr2a,Blnk</i>          |
| Metabolism of Xenobiotics by Cytochrome P450                                 | 1,64 | 0,04 | <i>Cyp51a1,Cyp2d6,Cyp4f8,Gsta1</i>                         |
| PI3K Signaling in B Lymphocytes                                              | 1,77 | 0,04 | <i>Fcgr2b,Rras2,C3,Ptpnc,Blnk</i>                          |
| Hepatic Fibrosis / Hepatic Stellate Cell Activation                          | 1,64 | 0,04 | <i>Ednrb,Stat1,Icam1,Col1a1,Igf1bp3</i>                    |
| CD28 Signaling in T Helper Cells                                             | 1,48 | 0,04 | <i>Fcer1g,Ptpn6,Cd4,Ptpnc</i>                              |
| Germ Cell-Sertoli Cell Junction Signaling                                    | 1,56 | 0,03 | <i>Milt4,Rras2,Iqgap1,Pls1,Rac2</i>                        |
| PKCθ Signaling in T Lymphocytes                                              | 1,49 | 0,03 | <i>Fcer1g,Rras2,Cd4,Rac2</i>                               |
| Wnt/β-catenin Signaling                                                      | 1,40 | 0,03 | <i>Fzd2,Gja1,Sox4,Wnt4,Nlk</i>                             |
| Cdc42 Signaling                                                              | 1,38 | 0,03 | <i>Fcer1g,B2m,Hla-C,Iqgap1</i>                             |
| Protein Ubiquitination Pathway                                               | 1,63 | 0,03 | <i>Hspb1,B2m,Hla-C,Psmb9,Psmb8,Ube2l6,Tap2</i>             |
| ERK/MAPK Signaling                                                           | 1,30 | 0,03 | <i>Hspb1,Rras2,Stat1,Dusp6,Rac2</i>                        |



**Supplemental table 5: List of genes regulated by aging in the hypothalamus**

| Gene Symbol                          | Gene Title                                                                       | RefSeq Transcript ID                        | Fold change | Gene Ontology Biological Process                                     |
|--------------------------------------|----------------------------------------------------------------------------------|---------------------------------------------|-------------|----------------------------------------------------------------------|
| <b>Up-regulated</b>                  |                                                                                  |                                             |             |                                                                      |
| <i>C3</i>                            | complement component 3                                                           | NM_016994                                   | <b>5,39</b> | positive regulation of type IIa hypersensitivity                     |
| <i>C4-2 /// C4b</i>                  | complement component 4, gene 2 /// complement component 4B (Chido blood group)   | NM_001002805 /// NM_031504                  | <b>3,58</b> | inflammatory response                                                |
| <i>RT1-A2 /// RT1-A3 /// RT1-EC2</i> | RT1 class Ia, locus A2 /// RT1 class I, locus A3 /// RT1 class Ib, locus EC2     | NM_001008829 /// NM_001008830 /// NM_012645 | <b>3,47</b> | positive regulation of T cell mediated cytotoxicity                  |
| <i>Psmb8</i>                         | proteasome (prosome, macropain) subunit, beta type 8 (large multifunctional pept | NM_080767                                   | <b>2,54</b> | antigen processing and presentation                                  |
| <i>Gpnmb</i>                         | glycoprotein (transmembrane) nmb                                                 | NM_133298                                   | <b>2,52</b> | osteoblast differentiation                                           |
| <i>Fcgr2a /// Fcgr2b</i>             | Fc fragment of IgG, low affinity IIa, receptor (CD32) /// Fc fragment of IgG, lo | NM_053843 /// NM_175756                     | <b>2,50</b> | antibody-dependent cellular cytotoxicity                             |
| <i>Bst2</i>                          | bone marrow stromal cell antigen 2                                               | NM_198134                                   | <b>2,37</b> | positive regulation of I-kappaB kinase/NF-kappaB cascade             |
| <i>Rsad2</i>                         | radical S-adenosyl methionine domain containing 2                                | NM_138881                                   | <b>2,12</b> | ossification                                                         |
| <i>Psmb9</i>                         | proteasome (prosome, macropain) subunit, beta type 9 (large multifunctional pept | NM_012708                                   | <b>2,11</b> | antigen processing and presentation                                  |
| <i>Fcgr3a</i>                        | Fc fragment of IgG, low affinity IIIa, receptor                                  | NM_207603                                   | <b>2,00</b> | NK T cell proliferation                                              |
| <i>Cp</i>                            | ceruloplasmin                                                                    | NM_012532                                   | <b>1,96</b> | liver development                                                    |
| <i>Lgals3bp</i>                      | lectin, galactoside-binding, soluble, 3 binding protein                          | NM_139096                                   | <b>1,95</b> | cell adhesion                                                        |
| <i>Emr1</i>                          | EGF-like module containing, mucin-like, hormone receptor-like 1                  | NM_001007557                                | <b>1,95</b> | signal transduction                                                  |
| <i>Igfbp3</i>                        | insulin-like growth factor binding protein 3                                     | NM_012588                                   | <b>1,90</b> | regulation of cell growth                                            |
| <i>Icam1</i>                         | intercellular adhesion molecule 1                                                | NM_012967                                   | <b>1,89</b> | ovarian follicle development                                         |
| <i>Anxa4</i>                         | annexin A4                                                                       | NM_024155                                   | <b>1,86</b> | exocytosis                                                           |
| <i>RT1-CE12</i>                      | RT1 class I, locus CE12                                                          | NM_001008835                                | <b>1,85</b> | antigen processing and presentation of peptide antigen via MHC class |
| <i>Hspb1</i>                         | heat shock protein 1                                                             | NM_031970                                   | <b>1,85</b> | anti-apoptosis                                                       |
| <i>C1qa</i>                          | complement component 1, q subcomponent, A chain                                  | NM_001008515                                | <b>1,84</b> | complement activation, classical pathway                             |
| <i>Lcp1</i>                          | lymphocyte cytosolic protein 1                                                   | NM_001012044                                | <b>1,82</b> | T cell activation involved in immune response                        |
| <i>Gbp2</i>                          | guanylate binding protein 2                                                      | NM_133624                                   | <b>1,77</b> |                                                                      |
| <i>Pqlc3</i>                         | PQ loop repeat containing 3                                                      | NM_001034952                                | <b>1,76</b> |                                                                      |
| <i>Aif1</i>                          | allograft inflammatory factor 1                                                  | NM_017196                                   | <b>1,76</b> | positive regulation of protein phosphorylation                       |
| <i>Dusp6</i>                         | Dual specificity phosphatase 6                                                   | NM_053883                                   | <b>1,75</b> | inactivation of MAPK activity                                        |
| <i>Grm2</i>                          | glutamate receptor, metabotropic 2                                               | NM_001105711                                | <b>1,73</b> | signal transduction                                                  |
| <i>Cd4</i>                           | Cd4 molecule                                                                     | NM_012705                                   | <b>1,71</b> | cytokine production                                                  |
| <i>Acer2</i>                         | alkaline ceramidase 2                                                            | NM_001107943                                | <b>1,70</b> | negative regulation of cell-matrix adhesion                          |
| <i>Cyp27a1</i>                       | cytochrome P450, family 27, subfamily a, polypeptide 1                           | NM_178847                                   | <b>1,68</b> | steroid catabolic process                                            |
| <i>Crym</i>                          | crystallin, mu                                                                   | NM_053955                                   | <b>1,68</b> | negative regulation of transcription from RNA polymerase II promoter |
| <i>C2</i>                            | complement component 2                                                           | NM_172222                                   | <b>1,67</b> | proteolysis                                                          |
| <i>Cenpj</i>                         | centromere protein J                                                             | NM_001107265                                | <b>1,66</b> | centriole replication                                                |
| <i>Cml3</i>                          | camello-like 3                                                                   | XM_001074100 /// XM_575585                  | <b>1,64</b> | gastrulation with mouth forming second                               |

|                        |                                                                                  |                                             |             |                                                                        |
|------------------------|----------------------------------------------------------------------------------|---------------------------------------------|-------------|------------------------------------------------------------------------|
| <i>Ms4a6b</i>          | membrane-spanning 4-domains, subfamily A, member 6B                              | NM_001006975                                | <b>1,63</b> |                                                                        |
| <i>Tyrobp</i>          | Tyrosine protein tyrosine kinase binding protein                                 | NM_212525                                   | <b>1,63</b> | intracellular signaling pathway                                        |
| <i>RT1-EC2</i>         | RT1 class Ib, locus EC2                                                          | NM_012645                                   | <b>1,63</b> | antigen processing and presentation of peptide antigen via MHC class   |
| <i>Ctsz</i>            | cathepsin Z                                                                      | NM_183330                                   | <b>1,63</b> | proteolysis                                                            |
| <i>Cfh</i>             | complement factor H                                                              | NM_130409                                   | <b>1,62</b> | complement activation                                                  |
| <i>Plek</i>            | pleckstrin                                                                       | NM_001025750                                | <b>1,62</b> | hemopoietic progenitor cell differentiation                            |
| <i>Rab27a</i>          | RAB27A, member RAS oncogene family                                               | NM_017317                                   | <b>1,61</b> | protein targeting                                                      |
| <i>Fam189a2</i>        | family with sequence similarity 189, member A2                                   | XM_001078764 /// XM_219909                  | <b>1,61</b> |                                                                        |
| <i>Smagp</i>           | small trans-membrane and glycosylated protein                                    | NM_182817                                   | <b>1,61</b> |                                                                        |
| <i>Fcgr1g</i>          | Fc fragment of IgE, high affinity I, receptor for; gamma polypeptide             | NM_001131001                                | <b>1,60</b> | positive regulation of type IIa hypersensitivity                       |
| <i>C1qc</i>            | complement component 1, q subcomponent, C chain                                  | NM_001008524                                | <b>1,59</b> | complement activation, classical pathway                               |
| <i>Pycard</i>          | PYD and CARD domain containing                                                   | NM_172322                                   | <b>1,58</b> | proteolysis                                                            |
| <i>Pcdhb9</i>          | protocadherin beta 9                                                             | NM_001109390                                | <b>1,56</b> | cell adhesion                                                          |
| <i>Ifit3</i>           | interferon-induced protein with tetratricopeptide repeats 3                      | NM_001007694                                | <b>1,55</b> |                                                                        |
| <i>Pbld</i>            | phenazine biosynthesis-like protein domain containing                            | NM_138530                                   | <b>1,54</b> | biosynthetic process                                                   |
| <i>Tspo</i>            | translocator protein                                                             | NM_012515                                   | <b>1,53</b> | steroid biosynthetic process                                           |
| <i>Tmc4</i>            | transmembrane channel-like 4                                                     | NM_001034104                                | <b>1,52</b> |                                                                        |
| <i>Stat1 /// Stat4</i> | signal transducer and activator of transcription 1 /// signal transducer and act | NM_001012226 /// NM_001034164 /// NM_032612 | <b>1,52</b> | transcription                                                          |
| <i>Tmem176a</i>        | transmembrane protein 176A                                                       | NM_001039008                                | <b>1,51</b> |                                                                        |
| <i>Adpgk</i>           | ADP-dependent glucokinase                                                        | NM_001100723                                | <b>1,50</b> | carbohydrate metabolic process                                         |
| <i>Aadat</i>           | aminoadipate aminotransferase                                                    | NM_017193                                   | <b>1,49</b> | 2-oxoglutarate metabolic process                                       |
| <i>Ube2l6</i>          | ubiquitin-conjugating enzyme E2L 6                                               | NM_001024755                                | <b>1,49</b> | modification-dependent protein catabolic process                       |
| <i>Cd53</i>            | Cd53 molecule                                                                    | NM_012523                                   | <b>1,48</b> | regulation of growth                                                   |
| <i>Uba7</i>            | ubiquitin-like modifier activating enzyme 7                                      | NM_001106856                                | <b>1,48</b> | protein modification process                                           |
| <i>Anxa3</i>           | Annexin A3                                                                       | NM_012823                                   | <b>1,47</b> | phagocytosis                                                           |
| <i>Clec7a</i>          | C-type lectin domain family 7, member a                                          | NM_001173386 /// XM_001067977 /// XM_578404 | <b>1,47</b> | response to yeast                                                      |
| <i>Serpina3n</i>       | serine (or cysteine) peptidase inhibitor, clade A, member 3N                     | NM_031531                                   | <b>1,47</b> | inflammatory response                                                  |
| <i>C1qb</i>            | complement component 1, q subcomponent, B chain                                  | NM_019262                                   | <b>1,47</b> | immune response                                                        |
| <i>Grxcr1</i>          | glutaredoxin, cysteine rich 1                                                    | NM_001191935 /// XM_001077572 /// XM_573590 | <b>1,46</b> | sensory perception of sound                                            |
| <i>Alb</i>             | albumin                                                                          | NM_134326                                   | <b>1,45</b> | transport                                                              |
| <i>Blnk</i>            | B-cell linker                                                                    | NM_001025767                                | <b>1,44</b> | intracellular signaling pathway                                        |
| <i>Ptpn6</i>           | protein tyrosine phosphatase, non-receptor type 6                                | NM_053908                                   | <b>1,44</b> | negative regulation of humoral immune response mediated by circulating |
| <i>Rac2</i>            | ras-related C3 botulinum toxin substrate 2                                       | NM_001008384                                | <b>1,44</b> | GTP catabolic process                                                  |
| <i>Irf9</i>            | interferon regulatory factor 9                                                   | NM_001012041                                | <b>1,43</b> | transcription                                                          |
| <i>Npc2</i>            | Niemann-Pick disease, type C2                                                    | NM_173118                                   | <b>1,42</b> | response to virus                                                      |
| <i>Calca</i>           | calcitonin-related polypeptide alpha                                             | NM_001033955 /// NM_001033956 /// NM_017338 | <b>1,41</b> | endothelial cell proliferation                                         |
| <i>Rnaset2</i>         | ribonuclease T2                                                                  | NM_001106210                                | <b>1,41</b> |                                                                        |
| <i>Dsp</i>             | desmoplakin                                                                      | XM_001058477 /// XM_225259                  | <b>1,41</b> | cell-cell adhesion                                                     |
| <i>Lap3</i>            | leucine aminopeptidase 3                                                         | NM_001011910                                | <b>1,40</b> | proteolysis                                                            |

|                  |                                                             |                                                                               |             |                                                                      |
|------------------|-------------------------------------------------------------|-------------------------------------------------------------------------------|-------------|----------------------------------------------------------------------|
| <i>RT1-CE5</i>   | RT1 class I, locus CE5                                      | NM_001008843 /// NM_001033986                                                 | <b>1,40</b> | antigen processing and presentation of peptide antigen via MHC class |
| <i>Csf1r</i>     | colony stimulating factor 1 receptor                        | NM_001029901                                                                  | <b>1,40</b> | protein phosphorylation                                              |
| <i>Tap2</i>      | transporter 2, ATP-binding cassette, sub-family B (MDR/TAP) | NM_032056                                                                     | <b>1,40</b> | positive regulation of T cell mediated cytotoxicity                  |
| <i>Tnfaip8l2</i> | tumor necrosis factor, alpha-induced protein 8-like 2       | NM_001014039                                                                  | <b>1,40</b> | innate immune response                                               |
| <i>Laptm5</i>    | lysosomal protein transmembrane 5                           | NM_053538                                                                     | <b>1,39</b> | transport                                                            |
| <i>Casp4</i>     | caspase 4, apoptosis-related cysteine peptidase             | NM_053736                                                                     | <b>1,39</b> | proteolysis                                                          |
| <i>S100a9</i>    | S100 calcium binding protein A9                             | NM_053587                                                                     | <b>1,38</b> | chronic inflammatory response                                        |
| <i>Cidea</i>     | cell death-inducing DFFA-like effector a                    | NM_001170467                                                                  | <b>1,37</b> | temperature homeostasis                                              |
| <i>Ephx1</i>     | epoxide hydrolase 1, microsomal                             | NM_001034090 /// NM_012844                                                    | <b>1,37</b> | cellular aromatic compound metabolic process                         |
| <i>Ptprc</i>     | protein tyrosine phosphatase, receptor type, C              | NM_001109887 /// NM_001109888 /// NM_001109889 /// NM_001109890 /// NM_138507 | <b>1,37</b> | activation of MAPK activity                                          |
| <i>Gldc</i>      | glycine dehydrogenase (decarboxylating)                     | NM_001107583                                                                  | <b>1,37</b> | cellular amino acid metabolic process                                |
| <i>Anxa11</i>    | annexin A11                                                 | NM_001011918                                                                  | <b>1,36</b> | phagocytosis                                                         |
| <i>Hck</i>       | hemopoietic cell kinase                                     | NM_013185                                                                     | <b>1,36</b> | protein phosphorylation                                              |
| <i>Unc93b1</i>   | unc-93 homolog B1 (C. elegans)                              | NM_001108513                                                                  | <b>1,36</b> | toll-like receptor signaling pathway                                 |
| <i>Gadd45b</i>   | growth arrest and DNA-damage-inducible, beta                | NM_001008321                                                                  | <b>1,36</b> | activation of MAPKK activity                                         |
| <i>Ifit2</i>     | interferon-induced protein with tetratricopeptide repeats 2 | NM_001024753                                                                  | <b>1,36</b> | cellular response to interferon-alpha                                |
| <i>Cd37</i>      | CD37 molecule                                               | NM_017124                                                                     | <b>1,36</b> | positive regulation of immunoglobulin production                     |
| <i>Ctse</i>      | cathepsin E                                                 | NM_012938                                                                     | <b>1,35</b> | proteolysis                                                          |
| <i>Cyb5r2</i>    | cytochrome b5 reductase 2                                   | NM_001014244                                                                  | <b>1,35</b> | steroid biosynthetic process                                         |
| <i>Pygl</i>      | phosphorylase, glycogen, liver                              | NM_022268                                                                     | <b>1,35</b> | carbohydrate metabolic process                                       |
| <i>Aqp1</i>      | aquaporin 1                                                 | NM_012778                                                                     | <b>1,35</b> | glomerular filtration                                                |
| <i>Gsta3</i>     | glutathione S-transferase A3                                | NM_031509                                                                     | <b>1,35</b> | glutathione metabolic process                                        |
| <i>Zfp36</i>     | zinc finger protein 36                                      | NM_133290                                                                     | <b>1,35</b> | nuclear-transcribed mRNA catabolic process, deadenylation-dependent  |
| <i>B2m</i>       | beta-2 microglobulin                                        | NM_012512                                                                     | <b>1,35</b> | positive regulation of T cell mediated cytotoxicity                  |
| <i>Six4</i>      | SIX homeobox 4                                              | NM_001106739                                                                  | <b>1,35</b> | regulation of transcription, DNA-dependent                           |
| <i>Slfn8</i>     | schlafen 8                                                  | NM_001013970                                                                  | <b>1,34</b> |                                                                      |
| <i>Pls1</i>      | Plastin 1 (I isoform)                                       | NM_001108178                                                                  | <b>1,34</b> |                                                                      |
| <i>Cd48</i>      | Cd48 molecule                                               | NM_139103                                                                     | <b>1,34</b> | signal transduction                                                  |
| <i>Cdh23</i>     | cadherin 23 (otocadherin)                                   | NM_053644                                                                     | <b>1,33</b> | cell adhesion                                                        |
| <i>Fcn1</i>      | ficolin (collagen/fibrinogen domain containing) 1           | NM_031348                                                                     | <b>1,33</b> | signal transduction                                                  |
| <i>Ctss</i>      | cathepsin S                                                 | NM_017320                                                                     | <b>1,33</b> | proteolysis                                                          |
| <i>Kitlg</i>     | KIT ligand                                                  | NM_021843 /// NM_021844                                                       | <b>1,33</b> | ovarian follicle development                                         |
| <i>Sash3</i>     | SAM and SH3 domain containing 3                             | NM_001134992                                                                  | <b>1,32</b> | positive regulation of immunoglobulin production                     |
| <i>Iqgap1</i>    | IQ motif containing GTPase activating protein 1             | NM_001108489                                                                  | <b>1,32</b> | signal transduction                                                  |
| <i>Abca8a</i>    | ATP-binding cassette, sub-family A (ABC1), member 8a        | XM_001081603 /// XM_221100                                                    | <b>1,32</b> |                                                                      |
| <i>Dctd</i>      | dCMP deaminase                                              | NM_001013882 /// NM_001161512                                                 | <b>1,32</b> | nucleotide biosynthetic process                                      |
| <i>Sp110</i>     | SP110 nuclear body protein                                  | NM_001034137                                                                  | <b>1,32</b> | transcription                                                        |
| <i>Dlk1</i>      | delta-like 1 homolog (Drosophila)                           | NM_053744                                                                     | <b>1,32</b> | embryo development                                                   |
| <i>Abcg3l1</i>   | ATP-binding cassette, sub-family G (WHITE), member 3-like 1 | NM_001004076                                                                  | <b>1,32</b> |                                                                      |
| <i>Cmtm7</i>     | CKLF-like MARVEL transmembrane domain containing 7          | NM_001109300                                                                  | <b>1,31</b> |                                                                      |
| <i>Arhgdib</i>   | Rho, GDP dissociation inhibitor (GDI) beta                  | NM_001009600                                                                  | <b>1,31</b> |                                                                      |

|               |                                       |                            |             |                                                                      |
|---------------|---------------------------------------|----------------------------|-------------|----------------------------------------------------------------------|
| <i>Wnk1</i>   | WNK lysine deficient protein kinase 1 | NM_001002823 /// NM_053794 | <b>1,30</b> | positive regulation of systemic arterial blood pressure              |
| <i>Klhl6</i>  | kelch-like 6 (Drosophila)             | NM_001105867               | <b>1,30</b> | germinal center formation                                            |
| <i>Plagl1</i> | pleiomorphic adenoma gene-like 1      | NM_012760                  | <b>1,30</b> | positive regulation of transcription from RNA polymerase II promoter |

#### Down-regulated

|                |                                                                                |                                             |              |                                                                  |
|----------------|--------------------------------------------------------------------------------|---------------------------------------------|--------------|------------------------------------------------------------------|
| <i>Ghrh</i>    | growth hormone releasing hormone                                               | NM_031577                                   | <b>-1,99</b> | G-protein signaling, coupled to cAMP nucleotide second messenger |
| <i>S100g</i>   | S100 calcium binding protein G                                                 | NM_012521                                   | <b>-1,82</b> |                                                                  |
| <i>Cd38</i>    | CD38 molecule                                                                  | NM_013127                                   | <b>-1,79</b> | response to hypoxia                                              |
| <i>Nts</i>     | neurotensin                                                                    | NM_001102381                                | <b>-1,76</b> | regulation of blood vessel size                                  |
| <i>Ccnd2</i>   | cyclin D2                                                                      | NM_022267                                   | <b>-1,72</b> | G1/S transition of mitotic cell cycle                            |
| <i>Pnlip</i>   | pancreatic lipase                                                              | NM_013161                                   | <b>-1,63</b> | lipid metabolic process                                          |
| <i>Scd1</i>    | stearoyl-Coenzyme A desaturase 1                                               | NM_139192                                   | <b>-1,57</b> | lipid metabolic process                                          |
| <i>Mtmr1</i>   | myotubularin related protein 1                                                 | NM_001191725 /// XM_001059230 /// XM_228644 | <b>-1,56</b> | dephosphorylation                                                |
| <i>Wnt4</i>    | wingless-type MMTV integration site family, member 4                           | NM_053402                                   | <b>-1,55</b> | metanephros development                                          |
| <i>Col1a1</i>  | collagen, type I, alpha 1                                                      | NM_053304                                   | <b>-1,52</b> | skeletal system development                                      |
| <i>Mfhas1</i>  | malignant fibrous histiocyoma amplified sequence 1                             | NM_001107316                                | <b>-1,52</b> |                                                                  |
| <i>Tlcd1</i>   | TLC domain containing 1                                                        | NM_001013858                                | <b>-1,51</b> |                                                                  |
| <i>Shisa4</i>  | shisa homolog 4 (Xenopus laevis)                                               | NM_001077826                                | <b>-1,48</b> |                                                                  |
| <i>Col5a2</i>  | collagen, type V, alpha 2                                                      | NM_053488                                   | <b>-1,47</b> | skeletal system development                                      |
| <i>Gal</i>     | galanin prepropeptide                                                          | NM_033237                                   | <b>-1,46</b> | response to stress                                               |
| <i>Tm7sf2</i>  | transmembrane 7 superfamily member 2                                           | NM_001013071                                | <b>-1,45</b> |                                                                  |
| <i>Slc7a10</i> | solute carrier family 7, (neutral amino acid transporter, y+ system) member 10 | NM_053726                                   | <b>-1,45</b> | amino acid transmembrane transport                               |
| <i>Fzd2</i>    | frizzled homolog 2 (Drosophila)                                                | NM_172035                                   | <b>-1,44</b> | cell activation                                                  |
| <i>Nlk</i>     | Nemo like kinase                                                               | NM_001191924 /// XM_001080888 /// XM_573152 | <b>-1,43</b> | protein phosphorylation                                          |
| <i>Pnma12</i>  | PNMA-like 2                                                                    | NM_001107481                                | <b>-1,42</b> |                                                                  |
| <i>Thrsp</i>   | thyroid hormone responsive                                                     | NM_012703                                   | <b>-1,42</b> |                                                                  |
| <i>Tmem100</i> | transmembrane protein 100                                                      | NM_001017479                                | <b>-1,41</b> |                                                                  |
| <i>Hhat1</i>   | hedgehog acyltransferase-like                                                  | NM_001106868                                | <b>-1,41</b> | negative regulation of N-terminal protein palmitoylation         |
| <i>Pop5</i>    | Processing of precursor 5, ribonuclease P/MRP subunit (S. cerevisiae)          | NM_001105752                                | <b>-1,41</b> | tRNA processing                                                  |
| <i>Egr4</i>    | early growth response 4                                                        | NM_019137                                   | <b>-1,40</b> | transcription                                                    |
| <i>Nptx1</i>   | neuronal pentraxin 1                                                           | NM_153735                                   | <b>-1,40</b> |                                                                  |
| <i>Bdh1</i>    | 3-hydroxybutyrate dehydrogenase, type 1                                        | NM_053995                                   | <b>-1,40</b> | liver development                                                |
| <i>Fastkd5</i> | FAST kinase domains 5                                                          | XR_085786 /// XR_086207                     | <b>-1,39</b> |                                                                  |
| <i>Fads2</i>   | fatty acid desaturase 2                                                        | NM_031344                                   | <b>-1,39</b> | lipid metabolic process                                          |
| <i>Sept_11</i> | septin 11                                                                      | NM_001107208                                | <b>-1,39</b> | cell cycle                                                       |
| <i>Ndp</i>     | Norrie disease (pseudoglioma) (human)                                          | NM_001108814                                | <b>-1,38</b> | placenta development                                             |
| <i>Slc40a1</i> | solute carrier family 39 (iron-regulated transporter), member 1                | NM_133315                                   | <b>-1,38</b> | transport                                                        |
| <i>Hcrtr1</i>  | hypocretin (orexin) receptor 1                                                 | NM_013064                                   | <b>-1,38</b> | signal transduction                                              |
| <i>Rras2</i>   | related RAS viral (r-ras) oncogene homolog 2                                   | NM_001013434                                | <b>-1,38</b> | signal transduction                                              |
| <i>Scrg1</i>   | stimulator of chondrogenesis 1                                                 | NM_033499                                   | <b>-1,37</b> |                                                                  |

|                |                                                                                  |                                                              |       |                                                                        |
|----------------|----------------------------------------------------------------------------------|--------------------------------------------------------------|-------|------------------------------------------------------------------------|
| <i>Phkg1</i>   | phosphorylase kinase, gamma 1                                                    | NM_031573                                                    | -1,37 | carbohydrate metabolic process                                         |
| <i>Tmem90b</i> | transmembrane protein 90B                                                        | NM_001025020                                                 | -1,36 | response to biotic stimulus                                            |
| <i>Syt6</i>    | synaptotagmin VI                                                                 | NM_022191                                                    | -1,36 | transport                                                              |
| <i>Col4a5</i>  | collagen, type IV, alpha 5                                                       | XM_001055156 /// XM_343778                                   | -1,36 |                                                                        |
| <i>YdjC</i>    | YdjC homolog (bacterial)                                                         | NM_001013863                                                 | -1,36 | carbohydrate metabolic process                                         |
| <i>Tbl1xr1</i> | transducin (beta)-like 1 X-linked receptor 1                                     | NM_001108941                                                 | -1,36 | negative regulation of gene-specific transcription from RNA polymerase |
| <i>Bbox1</i>   | butyrobetaine (gamma), 2-oxoglutarate dioxygenase (gamma-butyrobetaine hydroxyla | NM_022629                                                    | -1,36 | carnitine biosynthetic process                                         |
| <i>Cyp51</i>   | cytochrome P450, family 51                                                       | NM_012941                                                    | -1,35 | steroid biosynthetic process                                           |
| <i>Sv2b</i>    | synaptic vesicle glycoprotein 2b                                                 | NM_057207                                                    | -1,35 | neurotransmitter uptake                                                |
| <i>Fxyd7</i>   | FXD domain-containing ion transport regulator 7                                  | NM_022008                                                    | -1,35 | transport                                                              |
| <i>Slc1a2</i>  | solute carrier family 1 (glial high affinity glutamate transporter), member 2    | NM_001035233 /// NM_017215                                   | -1,34 | amino acid transmembrane transport                                     |
| <i>Rnf182</i>  | ring finger protein 182                                                          | NM_001109117                                                 | -1,34 | protein ubiquitination                                                 |
| <i>Tmeff1</i>  | transmembrane protein with EGF-like and two follistatin-like domains 1           | NM_023020                                                    | -1,34 | multicellular organismal development                                   |
| <i>Ednrb</i>   | endothelin receptor type B                                                       | NM_017333                                                    | -1,34 | neural crest cell migration                                            |
| <i>Asb1</i>    | ankyrin repeat and SOCS box-containing 1                                         | NM_001108232                                                 | -1,34 | intracellular signaling pathway                                        |
| <i>Timp4</i>   | tissue inhibitor of metalloproteinase 4                                          | NM_001109393                                                 | -1,33 | central nervous system development                                     |
| <i>Slc1a6</i>  | solute carrier family 1 (high affinity aspartate/glutamate transporter), member  | NM_032065                                                    | -1,33 | amino acid transmembrane transport                                     |
| <i>Gamt</i>    | guanidinoacetate N-methyltransferase                                             | NM_012793                                                    | -1,33 | creatine metabolic process                                             |
| <i>Nrarp</i>   | Notch-regulated ankyrin repeat protein                                           | NM_001143750                                                 | -1,33 |                                                                        |
| <i>Sst</i>     | somatostatin                                                                     | NM_012659                                                    | -1,33 | response to acid                                                       |
| <i>Nkain4</i>  | Na <sup>+</sup> /K <sup>+</sup> transporting ATPase interacting 4                | NM_001106550                                                 | -1,32 |                                                                        |
| <i>F2r</i>     | coagulation factor II (thrombin) receptor                                        | NM_012950                                                    | -1,32 | activation of MAPKK activity                                           |
| <i>Pdyn</i>    | prodynorphin                                                                     | NM_019374                                                    | -1,32 | neuropeptide signaling pathway                                         |
| <i>Hmgcr</i>   | 3-hydroxy-3-methylglutaryl-Coenzyme A reductase                                  | NM_013134                                                    | -1,32 | steroid biosynthetic process                                           |
| <i>Mpped1</i>  | metallophosphoesterase domain containing 1                                       | NM_001130569                                                 | -1,32 |                                                                        |
| <i>Cyp2d4</i>  | cytochrome P450, family 2, subfamily d, polypeptide 4                            | NM_138515                                                    | -1,32 | steroid metabolic process                                              |
| <i>Cpxm1</i>   | carboxypeptidase X (M14 family), member 1                                        | NM_001106511                                                 | -1,31 | proteolysis                                                            |
| <i>Metrn</i>   | meteorin, glial cell differentiation regulator                                   | NM_001009962                                                 | -1,31 | multicellular organismal development                                   |
| <i>Cyp4f17</i> | cytochrome P450, family 4, subfamily f, polypeptide 17                           | NM_001191986 /// XM_002726858 /// XM_002729769 /// XM_576190 | -1,31 |                                                                        |
| <i>Mllt4</i>   | myeloid/lymphoid or mixed-lineage leukemia (trithorax homolog, Drosophila); tran | NM_013217                                                    | -1,31 | cell adhesion                                                          |
| <i>Acss2</i>   | acyl-CoA synthetase short-chain family member 2                                  | NM_001107793                                                 | -1,31 | acetyl-CoA biosynthetic process                                        |
| <i>Fads1</i>   | fatty acid desaturase 1                                                          | NM_053445                                                    | -1,30 | lipid metabolic process                                                |
| <i>Cyp2d4</i>  | cytochrome P450, family 2, subfamily d, polypeptide 4                            | NM_138515                                                    | -1,30 | steroid metabolic process                                              |
| <i>Sox4</i>    | SRY (sex determining region Y)-box 4                                             | XM_001068302 /// XM_344594                                   | -1,30 | response to hypoxia                                                    |
| <i>Lrrc40</i>  | Leucine rich repeat containing 40                                                | NM_001034926                                                 | -1,30 |                                                                        |
| <i>Gja1</i>    | gap junction protein, alpha 1                                                    | NM_012567                                                    | -1,30 | in utero embryonic development                                         |
| <i>Csrp2</i>   | cysteine and glycine-rich protein 2                                              | NM_177425                                                    | -1,30 | multicellular organismal development                                   |
| <i>Dcx</i>     | doublecortin                                                                     | NM_053379                                                    | -1,30 | neuron migration                                                       |
| <i>Htr1a</i>   | 5-hydroxytryptamine (serotonin) receptor 1A                                      | NM_012585                                                    | -1,30 | signal transduction                                                    |

\* P value = 0.029, was obtained by permutation analysis. Fold change  $\geq 1.3$ .

**Supplemental table 6: List of genes regulated by LTMCR in the anterior pituitary**

| Gene Symbol                     | Gene Title                                                         | RefSeq Transcript ID                           | Fold change | Gene Ontology Biological Process                                     |
|---------------------------------|--------------------------------------------------------------------|------------------------------------------------|-------------|----------------------------------------------------------------------|
| <b>Up-regulated</b>             |                                                                    |                                                |             |                                                                      |
| <i>Snca</i>                     | synuclein, gamma (breast cancer-specific protein 1)                | NM_031688                                      | <b>3,11</b> | peripheral nervous system development                                |
| <i>Pcdh10</i>                   | protocadherin 10                                                   | XM_001054521 /// XM_342242                     | <b>2,45</b> | cell adhesion                                                        |
| <i>Per2</i>                     | period homolog 2 (Drosophila)                                      | NM_031678                                      | <b>2,07</b> | transcription                                                        |
| <i>Hspa1a</i> /// <i>Hspa1b</i> | heat shock 70kD protein 1A /// heat shock 70kD protein 1B (mapped) | NM_031971 /// NM_212504                        | <b>1,79</b> | telomere maintenance                                                 |
| <i>Dnajb1</i>                   | DnaJ (Hsp40) homolog, subfamily B, member 1                        | NM_001108441                                   | <b>1,67</b> | protein folding                                                      |
| <i>Chordc1</i>                  | cysteine and histidine-rich domain (CHORD)-containing 1            | NM_001108128                                   | <b>1,67</b> |                                                                      |
| <i>Usp2</i>                     | ubiquitin specific peptidase 2                                     | NM_053774                                      | <b>1,64</b> | negative regulation of transcription from RNA polymerase II promoter |
| <i>Adamtsl4</i>                 | ADAMTS-like 4                                                      | NM_001034012                                   | <b>1,61</b> | apoptosis                                                            |
| <i>Lrrn3</i>                    | leucine rich repeat neuronal 3                                     | NM_030856                                      | <b>1,58</b> | positive regulation of protein phosphorylation                       |
| <i>Plk5</i>                     | polo-like kinase 5                                                 | NM_001170557 /// XM_001076512<br>/// XM_234920 | <b>1,47</b> | protein phosphorylation                                              |
| <i>Dnase1</i>                   | deoxyribonuclease I                                                | NM_013097                                      | <b>1,45</b> | DNA catabolic process                                                |
| <i>Nr1d2</i>                    | nuclear receptor subfamily 1, group D, member 2                    | NM_147210                                      | <b>1,44</b> | transcription                                                        |
| <i>Hgf</i>                      | hepatocyte growth factor activator                                 | NM_053320                                      | <b>1,43</b> | proteolysis                                                          |
| <i>Fkbp14</i>                   | FK506 binding protein 14                                           | NM_001013210                                   | <b>1,42</b> | protein folding                                                      |
| <i>Tef</i>                      | thyrotrophic embryonic factor                                      | NM_019194                                      | <b>1,41</b> | transcription                                                        |
| <i>Rbm3</i>                     | RNA binding motif (RNP1, RRM) protein 3                            | NM_053696                                      | <b>1,39</b> | translation                                                          |
| <i>Jam2</i>                     | junctional adhesion molecule 2                                     | NM_001034004                                   | <b>1,38</b> |                                                                      |
| <i>Bhlhe41</i>                  | basic helix-loop-helix family, member e41                          | XM_001074956 /// XM_002729454                  | <b>1,37</b> | transcription                                                        |
| <i>Dnaja1</i>                   | DnaJ (Hsp40) homolog, subfamily A, member 1                        | NM_022934                                      | <b>1,35</b> | protein folding                                                      |
| <i>Hla-e</i>                    | Major histocompatibility complex class I E                         | NM_001008886                                   | <b>1,35</b> | positive regulation of T cell mediated cytotoxicity                  |
| <i>Myh6</i>                     | myosin, heavy chain 6, cardiac muscle, alpha                       | NM_017239                                      | <b>1,35</b> | response to reactive oxygen species                                  |
| <i>Syncp</i>                    | Synaptotagmin binding, cytoplasmic RNA interacting protein         | NM_001047916                                   | <b>1,34</b> | mRNA processing                                                      |
| <i>Klf6</i>                     | Kruppel-like factor 6                                              | NM_031642                                      | <b>1,34</b> | transcription                                                        |
| <i>Cacybp</i>                   | calcyclin binding protein                                          | NM_001004208                                   | <b>1,34</b> | heart development                                                    |
| <i>Avil</i>                     | advillin                                                           | NM_024401                                      | <b>1,34</b> | cytoskeleton organization                                            |

|                |                                     |              |             |                         |
|----------------|-------------------------------------|--------------|-------------|-------------------------|
| <i>Wee1</i>    | wee 1 homolog (S. pombe)            | NM_001012742 | <b>1,34</b> | protein phosphorylation |
| <i>Birc3</i>   | baculoviral IAP repeat-containing 3 | NM_023987    | <b>1,33</b> | anti-apoptosis          |
| <i>Mettl7a</i> | methyltransferase like 7A           | NM_001037355 | <b>1,32</b> | metabolic process       |
| <i>Tpsb2</i>   | tryptase beta 2                     | NM_019180    | <b>1,31</b> | proteolysis             |
| <i>H13</i>     | histocompatibility 13               | NM_001107789 | <b>1,31</b> |                         |
| <i>Cry2</i>    | cryptochrome 2 (photolyase-like)    | NM_133405    | <b>1,30</b> | DNA repair              |
| <i>Jph3</i>    | junctophilin 3                      | NM_001107437 | <b>1,30</b> | locomotion              |

## Down-regulated

|                                         |                                                                                     |                                                |              |                                                                 |
|-----------------------------------------|-------------------------------------------------------------------------------------|------------------------------------------------|--------------|-----------------------------------------------------------------|
| <i>Igfbp3</i>                           | insulin-like growth factor binding protein 3                                        | NM_012588                                      | <b>-2,33</b> | regulation of cell growth                                       |
| <i>Nupr1</i>                            | nuclear protein, transcriptional regulator, 1                                       | NM_053611                                      | <b>-1,93</b> | acute inflammatory response                                     |
| <i>Fam171a1</i> ///<br><i>LOC684862</i> | family with sequence similarity 171, member A1<br>/// hypothetical protein LOC68486 | XM_001056358 /// XM_001072231                  | <b>-1,93</b> |                                                                 |
| <i>Lix1</i>                             | Lix1 homolog (chicken)                                                              | NM_001106214                                   | <b>-1,92</b> |                                                                 |
| <i>Serping1</i>                         | serine (or cysteine) peptidase inhibitor, clade G,<br>member 1                      | NM_199093                                      | <b>-1,76</b> | negative regulation of complement activation, lectin<br>pathway |
| <i>F2r</i>                              | coagulation factor II (thrombin) receptor                                           | NM_012950                                      | <b>-1,76</b> | activation of MAPKK activity                                    |
| <i>Ptp4a3</i>                           | protein tyrosine phosphatase 4a3                                                    | NM_001114405                                   | <b>-1,74</b> | protein dephosphorylation                                       |
| <i>Cmb1</i>                             | carboxymethylenebutenolidase homolog<br>(Pseudomonas)                               | NM_001008770                                   | <b>-1,74</b> |                                                                 |
| <i>Syn2</i>                             | synapsin II                                                                         | NM_001034020 /// NM_019159                     | <b>-1,73</b> | neurotransmitter secretion                                      |
| <i>Xdh</i>                              | xanthine dehydrogenase                                                              | NM_017154                                      | <b>-1,70</b> | lactation                                                       |
| <i>Chrn4</i>                            | cholinergic receptor, nicotinic, beta 4                                             | NM_052806                                      | <b>-1,68</b> | regulation of action potential                                  |
| <i>Aqp4</i>                             | aquaporin 4                                                                         | NM_001142366 /// NM_012825                     | <b>-1,65</b> | transport                                                       |
| <i>Arsb</i>                             | arylsulfatase B                                                                     | NM_033443                                      | <b>-1,64</b> | autophagy                                                       |
| <i>B4gal4</i>                           | UDP-Gal:betaGlcNAc beta 1,4-<br>galactosyltransferase, polypeptide 4                | NM_001012018                                   | <b>-1,64</b> | carbohydrate metabolic process                                  |
| <i>Pigt</i>                             | phosphatidylinositol glycan anchor biosynthesis,<br>class T                         | NM_001106540                                   | <b>-1,61</b> | attachment of GPI anchor to protein                             |
| <i>Tmem98</i>                           | transmembrane protein 98                                                            | NM_001007672                                   | <b>-1,57</b> |                                                                 |
| <i>Aqp1</i>                             | aquaporin 1                                                                         | NM_012778                                      | <b>-1,55</b> | glomerular filtration                                           |
| <i>Arntl</i>                            | aryl hydrocarbon receptor nuclear translocator-<br>like                             | NM_024362                                      | <b>-1,51</b> | protein import into nucleus, translocation                      |
| <i>Retsat</i>                           | retinol saturase (all trans retinol 13,14<br>reductase)                             | NM_145084                                      | <b>-1,50</b> | retinol metabolic process                                       |
| <i>Cbr1</i> ///<br><i>LOC100360507</i>  | carbonyl reductase 1 /// inducible carbonyl<br>reductase-like                       | NM_019170 /// XM_002727460 ///<br>XM_002727863 | <b>-1,50</b> | ovulation from ovarian follicle                                 |
| <i>Slc43a2</i>                          | solute carrier family 43, member 2                                                  | NM_001105812                                   | <b>-1,47</b> | amino acid transmembrane transport                              |
| <i>Carhsp1</i>                          | calcium regulated heat stable protein 1                                             | NM_152790                                      | <b>-1,47</b> | regulation of transcription, DNA-dependent                      |
| <i>H2afj</i>                            | H2A histone family, member J                                                        | NM_001109610                                   | <b>-1,46</b> | nucleosome assembly                                             |
| <i>Glrx1</i>                            | glutaredoxin 1                                                                      | NM_022278                                      | <b>-1,45</b> | transport                                                       |

|                   |                                                                                |                                                                               |       |                                                                  |
|-------------------|--------------------------------------------------------------------------------|-------------------------------------------------------------------------------|-------|------------------------------------------------------------------|
| <i>Pvrl2</i>      | poliovirus receptor-related 2                                                  | NM_001012064                                                                  | -1,44 | positive regulation of natural killer cell mediated cytotoxicity |
| <i>Tspan8</i>     | tetraspanin 8                                                                  | NM_133526                                                                     | -1,44 | negative regulation of blood coagulation                         |
| <i>Slco3a1</i>    | Solute carrier organic anion transporter family, member 3a1                    | NM_177481                                                                     | -1,44 | transport                                                        |
| <i>Emcn</i>       | endomucin                                                                      | NM_001004228                                                                  | -1,43 | angiogenesis                                                     |
| <i>Flnb</i>       | filamin, beta                                                                  | NM_001107288                                                                  | -1,43 | skeletal muscle tissue development                               |
| <i>Eid2b</i>      | EP300 interacting inhibitor of differentiation 2B                              | XM_002725600 /// XM_574407                                                    | -1,40 |                                                                  |
| <i>Trappc6a</i>   | trafficking protein particle complex 6A                                        | NM_001109410                                                                  | -1,40 | cGMP biosynthetic process                                        |
| <i>Myh14</i>      | myosin, heavy chain 14                                                         | NM_001100690                                                                  | -1,39 | ATP catabolic process                                            |
| <i>Nup93</i>      | nucleoporin 93                                                                 | NM_001011925                                                                  | -1,39 | transport                                                        |
| <i>Sts</i>        | steroid sulfatase                                                              | NM_012661                                                                     | -1,38 | lipid metabolic process                                          |
| <i>Kazald1</i>    | Kazal-type serine peptidase inhibitor domain 1                                 | NM_001033064                                                                  | -1,38 | regulation of cell growth                                        |
| <i>Tfpi</i>       | tissue factor pathway inhibitor (lipoprotein-associated coagulation inhibitor) | NM_001177321 /// NM_017200                                                    | -1,38 | blood coagulation                                                |
| <i>Slc20a2</i>    | solute carrier family 20 (phosphate transporter), member 2                     | NM_017223                                                                     | -1,38 | transport                                                        |
| <i>Klc1</i>       | kinesin light chain 1                                                          | NM_001081972 /// NM_001081973 /// NM_001081974                                | -1,37 | axon cargo transport                                             |
| <i>Glx5</i>       | glutaredoxin 5                                                                 | NM_001108722                                                                  | -1,37 | cell redox homeostasis                                           |
| <i>Ehd3</i>       | EH-domain containing 3                                                         | NM_138890                                                                     | -1,37 |                                                                  |
| <i>Nfs1</i>       | NFS1 nitrogen fixation 1 homolog (S. cerevisiae)                               | NM_053462                                                                     | -1,35 | cysteine metabolic process                                       |
| <i>Cenpb</i>      | centromere protein B                                                           | XM_001081194 /// XM_342521                                                    | -1,35 | regulation of transcription                                      |
| <i>Bend5</i>      | BEN domain containing 5                                                        | NM_001108672                                                                  | -1,35 |                                                                  |
| <i>Chchd6</i>     | coiled-coil-helix-coiled-coil-helix domain containing 6                        | NM_001106608                                                                  | -1,35 |                                                                  |
| <i>Thumpd3</i>    | THUMP domain containing 3                                                      | NM_001170546 /// NM_001170547 /// NM_001170548 /// XM_001078607 /// XM_575638 | -1,35 |                                                                  |
| <i>Rrm1</i>       | ribonucleotide reductase M1                                                    | NM_001013236                                                                  | -1,35 | DNA replication                                                  |
| <i>Csgalnact1</i> | chondroitin sulfate N-acetylgalactosaminyltransferase 1                        | NM_001107309                                                                  | -1,34 | UDP-N-acetylgalactosamine metabolic process                      |
| <i>Slc41a3</i>    | solute carrier family 41, member 3                                             | NM_001037492                                                                  | -1,34 | cation transport                                                 |
| <i>Gaa</i>        | glucosidase, alpha, acid                                                       | NM_199118                                                                     | -1,33 | angiogenesis                                                     |
| <i>Pigy</i>       | phosphatidylinositol glycan anchor biosynthesis, class Y                       | NM_001024370                                                                  | -1,33 | GPI anchor biosynthetic process                                  |
| <i>Pfkfb</i>      | phosphofructokinase, platelet                                                  | NM_206847                                                                     | -1,33 | fructose 6-phosphate metabolic process                           |
| <i>Cip98</i>      | CASK-interacting protein CIP98                                                 | NM_181088                                                                     | -1,33 | retina homeostasis                                               |



|                 |                                                                               |                               |       |                                       |
|-----------------|-------------------------------------------------------------------------------|-------------------------------|-------|---------------------------------------|
| <i>Galm</i>     | galactose mutarotase (aldose 1-epimerase)                                     | NM_001007704                  | -1,33 | carbohydrate metabolic process        |
| <i>Tfrc</i>     | transferrin receptor                                                          | NM_022712                     | -1,33 | response to hypoxia                   |
| <i>Bat3</i>     | HLA-B-associated transcript 3                                                 | NM_001033968 /// NM_053609    | -1,33 | regulation of cell proliferation      |
| <i>Pdhx</i>     | Pyruvate dehydrogenase complex, component X                                   | NM_001044242                  | -1,33 | metabolic process                     |
| <i>Polr2l</i>   | polymerase (RNA) II (DNA directed) polypeptide L                              | NM_001143911                  | -1,33 | transcription, DNA-dependent          |
| <i>Prr13</i>    | proline rich 13                                                               | NM_001008379                  | -1,33 | transcription                         |
| <i>Aloxe3</i>   | arachidonate lipoxygenase 3                                                   | NM_001105793                  | -1,33 | leukotriene metabolic process         |
| <i>Mrpl21</i>   | mitochondrial ribosomal protein L21                                           | NM_001107567                  | -1,32 | translation                           |
| <i>G3bp1</i>    | GTPase activating protein (SH3 domain) binding protein 1                      | NM_133565                     | -1,32 | transport                             |
| <i>Adck5</i>    | aarF domain containing kinase 5                                               | NM_001135798                  | -1,32 |                                       |
| <i>Mrps18a</i>  | mitochondrial ribosomal protein S18A                                          | NM_198756                     | -1,32 | translation                           |
| <i>Thy1</i>     | Thy-1 cell surface antigen                                                    | NM_012673                     | -1,32 | angiogenesis                          |
| <i>Lgals3bp</i> | lectin, galactoside-binding, soluble, 3 binding protein                       | NM_139096                     | -1,32 | cell adhesion                         |
| <i>Bat5</i>     | HLA-B associated transcript 5                                                 | NM_212531                     | -1,32 |                                       |
| <i>Aig1</i>     | androgen-induced 1                                                            | NM_001134425                  | -1,32 |                                       |
| <i>Elmo2</i>    | engulfment and cell motility 2                                                | NM_001134955                  | -1,32 | phagocytosis                          |
| <i>Cd151</i>    | CD151 molecule (Raph blood group)                                             | NM_022523                     | -1,32 | hemidesmosome assembly                |
| <i>Ppp1r10</i>  | protein phosphatase 1, regulatory subunit 10                                  | NM_022951                     | -1,31 | transcription                         |
| <i>Camk2d</i>   | calcium/calmodulin-dependent protein kinase II delta                          | NM_012519                     | -1,31 | G1/S transition of mitotic cell cycle |
| <i>Mcts2</i>    | malignant T cell amplified sequence 2                                         | XM_001071410 /// XM_002726252 | -1,31 |                                       |
| <i>Bola3</i>    | bolA homolog 3 (E. coli)                                                      | NM_001106601                  | -1,31 |                                       |
| <i>Atp5s</i>    | ATP synthase, H+ transporting, mitochondrial F0 complex, subunit s (factor B) | NM_001007749                  | -1,31 | ATP biosynthetic process              |
| <i>Mgea5</i>    | meningioma expressed antigen 5 (hyaluronidase)                                | NM_131904                     | -1,31 | N-acetylglucosamine metabolic process |
| <i>Shbg</i>     | sex hormone binding globulin                                                  | NM_012650                     | -1,31 | primary spermatocyte growth           |
| <i>Gmpr</i>     | guanosine monophosphate reductase                                             | NM_057188                     | -1,30 | metabolic process                     |
| <i>Laptm4b</i>  | lysosomal protein transmembrane 4 beta                                        | NM_001013174                  | -1,30 | transport                             |
| <i>Sorcs2</i>   | sortilin-related VPS10 domain containing receptor 2                           | NM_001107225                  | -1,30 |                                       |
| <i>Taf10</i>    | TAF10 RNA polymerase II, TATA box binding protein (TBP)-associated factor     | NM_001134735                  | -1,30 | G1/S transition of mitotic cell cycle |
| <i>Asns</i>     | asparagine synthetase                                                         | NM_013079                     | -1,30 | liver development                     |

\* *P* value = 0.029, was obtained by permutation analysis. Fold change  $\geq 1.3$ .

**Supplemental table 7: List of genes regulated by caloric restriction, classified by biological functions**

**A- Anterior Pituitary**

| Category                                   | # of genes | P value           | Genes                                                                                                                                                                                                                                                                |
|--------------------------------------------|------------|-------------------|----------------------------------------------------------------------------------------------------------------------------------------------------------------------------------------------------------------------------------------------------------------------|
| Cell Death                                 | 35         | 5,22E-03-4,71E-02 | <i>Snca, Prr13, Camk2d, Taf10, Dnaja1, Klif6, Asns, Pvr12, Glrx, Laptm4b, Dnajb1, Rbm3, Adamtsl4, Jph3, F2r, Bag6, Shbg, Tfr, Aqp1, Hspa1a/Hspa1b, Hla-E, Dnase1, Tpsab1/Tpsb2, Wee1, Birc3, Lgals3bp, Pigf, Cacybp, Flnb, Nupr1, Xdh, Thy1, Usp2, Igfbp3, Atp5s</i> |
| Cellular Function and Maintenance          | 21         | 9,35E-04-4,71E-02 | <i>F2r, Myh14, Hspa1a/Hspa1b, Aqp1, Sorcs2, Tfr, Hla-E, Chmb4, Aqp4, Dnase1, Camk2d, Syn2, Dnaja1, Slc20a2, Myh6, Dnajb1, Gaa, Cd151, Nupr1, Xdh, Arst</i>                                                                                                           |
| Cell-To-Cell Signaling and Interaction     | 18         | 2,6E-04-4,71E-02  | <i>F2r, Serping1, Hspa1a/Hspa1b, Tfr, Snca, Chmb4, Syn2, Jam2, Pvr12, Birc3, Lgals3bp, Dfnb31, Tfp1, Cd151, Xdh, Thy1, Ptp4a3, Igfbp3</i>                                                                                                                            |
| Cellular Assembly and Organization         | 16         | 3,34E-03-4,71E-02 | <i>F2r, Myh14, Hspa1a/Hspa1b, Snca, Dnase1, Camk2d, Syn2, Dnaja1, Klc1, Pvr12, Myh6, Dnajb1, Gaa, Flnb, Xdh, Arst</i>                                                                                                                                                |
| Small Molecule Biochemistry                | 14         | 1,47E-04-4,71E-02 | <i>F2r, Slco3a1, Serping1, Aqp1, Snca, Tef, Csgalnact1, Dnaja1, Asns, Dnajb1, Tfp1, Xdh, Arsb, Igfbp3</i>                                                                                                                                                            |
| Cell Morphology                            | 13         | 3,78E-04-4,71E-02 | <i>F2r, Aqp1, Snca, Aqp4, Cenpb, Klc1, Pvr12, Elmo2, Cd151, Flnb, Xdh, Nupr1, Igfbp3</i>                                                                                                                                                                             |
| Cellular Compromise                        | 11         | 3,34E-03-4,71E-02 | <i>Pvr12, Hspa1a/Hspa1b, Aqp1, Snca, Dnajb1, Aqp4, Dnase1, Flnb, Dnaja1, Xdh, Klc1</i>                                                                                                                                                                               |
| Cellular Growth and Proliferation          | 11         | 8,01E-03-4,71E-02 | <i>F2r, Shbg, Hspa1a/Hspa1b, Tfr, Hla-E, Tpsab1/Tpsb2, Thy1, Klif6, Ptp4a3, Armtl, Igfbp3</i>                                                                                                                                                                        |
| Molecular Transport                        | 10         | 3,78E-04-4,71E-02 | <i>Ppp1r10, Slco3a1, Tfr, Aqp1, Cry2, Aqp4, Dnaja1, Xdh, Igfbp3, Arst</i>                                                                                                                                                                                            |
| Cellular Development                       | 9          | 8,01E-03-4,07E-02 | <i>Pvr12, Shbg, Hspa1a/Hspa1b, Tfr, Aloxe3, Klif6, Thy1, Ptp4a3, Igfbp3</i>                                                                                                                                                                                          |
| Cellular Movement                          | 9          | 8,01E-03-3,94E-02 | <i>Pvr12, F2r, Myh14, Tfr, Snca, Cd151, Xdh, Ptp4a3, Igfbp3</i>                                                                                                                                                                                                      |
| Lipid Metabolism                           | 8          | 1,47E-04-4,71E-02 | <i>F2r, Slco3a1, Serping1, Snca, Dnajb1, Tef, Dnaja1, Xdh</i>                                                                                                                                                                                                        |
| Carbohydrate Metabolism                    | 7          | 8,01E-03-4,71E-02 | <i>F2r, Aqp1, Tfp1, Csgalnact1, Xdh, Pfkfb, Arsb</i>                                                                                                                                                                                                                 |
| Drug Metabolism                            | 6          | 1,73E-03-4,71E-02 | <i>Glrx, Snca, Dnajb1, Tfp1, Dnaja1, Xdh</i>                                                                                                                                                                                                                         |
| Protein Synthesis                          | 5          | 3,78E-04-4,71E-02 | <i>Tfr, Aqp4, Taf10, Ehd3, Igfbp3</i>                                                                                                                                                                                                                                |
| Protein Trafficking                        | 5          | 3,78E-04-9,24E-03 | <i>Ppp1r10, Tfr, Cry2, Dnaja1, Igfbp3</i>                                                                                                                                                                                                                            |
| DNA Replication, Recombination, and Repair | 4          | 3,34E-03-4,71E-02 | <i>Hspa1a/Hspa1b, Dnajb1, Dnase1, Dnaja1</i>                                                                                                                                                                                                                         |
| Cell Cycle                                 | 4          | 8,01E-03-4,71E-02 | <i>Myh14, Hspa1a/Hspa1b, Wee1, Igfbp3</i>                                                                                                                                                                                                                            |
| Post-Translational Modification            | 3          | 5,44E-03-3,94E-02 | <i>Hspa1a/Hspa1b, Dnaja1, Xdh</i>                                                                                                                                                                                                                                    |
| Gene Expression                            | 3          | 8,01E-03-4,71E-02 | <i>Dnajb1, Taf10, Igfbp3</i>                                                                                                                                                                                                                                         |
| Protein Folding                            | 2          | 5,44E-03-5,44E-03 | <i>Hspa1a/Hspa1b, Dnaja1</i>                                                                                                                                                                                                                                         |
| Amino Acid Metabolism                      | 2          | 8,01E-03-4,71E-02 | <i>Asns, Igfbp3</i>                                                                                                                                                                                                                                                  |
| Nucleic Acid Metabolism                    | 2          | 8,01E-03-1,6E-02  | <i>Csgalnact1, Xdh</i>                                                                                                                                                                                                                                               |
| Cell Signaling                             | 2          | 2,1E-02-3,94E-02  | <i>Xdh, Igfbp3</i>                                                                                                                                                                                                                                                   |

**B- Hypothalamus**

| Category                                   | # of genes | P value           | Genes                                                                                                                                            |
|--------------------------------------------|------------|-------------------|--------------------------------------------------------------------------------------------------------------------------------------------------|
| Cellular Growth and Proliferation          | 19         | 3,18E-04-4,79E-02 | <i>Dnaja3, Nov, Apoa1, Irf2, Hspa1a/Hspa1b, Yy1, Nr1d1, Fkbp5, Cd1d, Cartpt, Tpr, Egr2, Vcan, Casp8, Calcr1, Rbm3, Nr4a3, Tgm2, Pla2g3</i>       |
| Cell Death                                 | 19         | 1,43E-03-4,93E-02 | <i>Dnaja3, Otud7b, Hspa1a/Hspa1b, Irf2, Apoa1, Yy1, Nr1d1, Fkbp5, Cd1d, Egr2, Camk1g, Vcan, Casp8, Calcr1, Rbm3, Nr4a3, Tgm2, Ppp1r15b, Gas2</i> |
| Cellular Development                       | 15         | 3,66E-04-4,54E-02 | <i>Dnaja3, Nov, Apoa1, Hspa1a/Hspa1b, Irf2, Yy1, Nr1d1, Cd1d, Cartpt, Egr2, Kat6a, Vcan, Casp8, Nr4a3, Tgm2</i>                                  |
| Cellular Movement                          | 15         | 3,26E-03-4,79E-02 | <i>Dnaja3, Nov, Hspa1a/Hspa1b, Apoa1, Yy1, Nr1d1, Cd1d, Tpr, Cartpt, Egr2, Vcan, Casp8, Calcr1, Nr4a3, Tgm2</i>                                  |
| Cell-To-Cell Signaling and Interaction     | 12         | 5,62E-04-4,79E-02 | <i>Dnaja3, Egr2, Hspa1a/Hspa1b, Vcan, Apoa1, Irf2, Casp8, Calcr1, Tgm2, Cd1d, Cartpt, Gas2</i>                                                   |
| Cellular Function and Maintenance          | 11         | 3,66E-04-4,47E-02 | <i>Dnaja3, Egr2, Hspa1a/Hspa1b, Apoa1, Irf2, Casp8, Syt6, Ppp1r15b, Tgm2, Cartpt, Cd1d</i>                                                       |
| Small Molecule Biochemistry                | 11         | 1,13E-03-4,79E-02 | <i>Irf2, Vcan, Apoa1, Casp8, Calcr1, Nr4a3, Fkbp5, Pla2g3, Tgm2, Cd1d, Cartpt</i>                                                                |
| Gene Expression                            | 11         | 9,76E-03-4,13E-02 | <i>Egr2, Kat6a, Irf2, Yy1, Casp8, Nr4a3, Nr1d1, Rbm3, Per2, Tgm2, Tle1</i>                                                                       |
| Cellular Assembly and Organization         | 10         | 1,37E-03-4,47E-02 | <i>Egr2, Dnaja3, Vcan, Apoa1, Hspa1a/Hspa1b, Casp8, Syt6, Fkbp5, Tgm2, Gas2</i>                                                                  |
| DNA Replication, Recombination, and Repair | 10         | 3,26E-03-3,78E-02 | <i>Dnaja3, Nov, Zbtb20, Kat6a, Hspa1a/Hspa1b, Irf2, Yy1, Casp8, Nr4a3, Tgm2</i>                                                                  |
| Lipid Metabolism                           | 8          | 1,13E-03-4,79E-02 | <i>Irf2, Apoa1, Casp8, Nr4a3, Fkbp5, Pla2g3, Cd1d, Cartpt</i>                                                                                    |
| Cell Signaling                             | 8          | 3,26E-03-3,53E-02 | <i>Dnaja3, Otud7b, Apoa1, Irf2, Casp8, Calcr1, Tgm2, Cartpt</i>                                                                                  |
| Cellular Compromise                        | 7          | 3,26E-03-4,47E-02 | <i>Hspa1a/Hspa1b, Irf2, Yy1, Casp8, Nr4a3, Tgm2, Gas2</i>                                                                                        |
| Molecular Transport                        | 7          | 3,26E-03-4,79E-02 | <i>Irf2, Apoa1, Syt6, Pla2g3, Tgm2, Tpr, Cartpt</i>                                                                                              |
| Cell Morphology                            | 6          | 1,66E-02-4,47E-02 | <i>Egr2, Dnaja3, Vcan, Casp8, Fkbp5, Tgm2</i>                                                                                                    |
| Carbohydrate Metabolism                    | 4          | 3,26E-03-3,85E-02 | <i>Apoa1, Pla2g3, Cd1d, Cartpt</i>                                                                                                               |
| Cell Cycle                                 | 4          | 3,26E-03-2,58E-02 | <i>Hspa1a/Hspa1b, Yy1, Nr4a3, Tpr</i>                                                                                                            |
| Protein Degradation                        | 4          | 1,69E-02-4,51E-02 | <i>Dnaja3, Apoa1, Casp8, Tgm2</i>                                                                                                                |
| Protein Synthesis                          | 4          | 1,69E-02-4,51E-02 | <i>Dnaja3, Apoa1, Casp8, Tgm2</i>                                                                                                                |
| Antigen Presentation                       | 3          | 5,62E-04-4,47E-02 | <i>Apoa1, Irf2, Tgm2</i>                                                                                                                         |
| Energy Production                          | 3          | 4,56E-03-1,63E-02 | <i>Apoa1, Nr4a3, Cartpt</i>                                                                                                                      |
| Nucleic Acid Metabolism                    | 3          | 1,96E-02-1,96E-02 | <i>Apoa1, Casp8, Calcr1</i>                                                                                                                      |
| Vitamin and Mineral Metabolism             | 2          | 6,51E-03-3,53E-02 | <i>Apoa1, Tgm2</i>                                                                                                                               |
| Drug Metabolism                            | 2          | 1,3E-02-4,47E-02  | <i>Fkbp5, Cartpt</i>                                                                                                                             |
| Post-Translational Modification            | 2          | 1,74E-02-4,47E-02 | <i>Dnaja3, Hspa1a/Hspa1b</i>                                                                                                                     |
| Protein Folding                            | 2          | 1,74E-02-4,47E-02 | <i>Dnaja3, Hspa1a/Hspa1b</i>                                                                                                                     |
| Amino Acid Metabolism                      | 2          | 1,94E-02-4,79E-02 | <i>Vcan, Cartpt</i>                                                                                                                              |

**Supplemental table 8: List of canonical pathways significantly represented by genes regulated with LTMCR**

**A- Anterior Pituitary**

| <b>Ingenuity Canonical Pathways</b>                        | <b>-log(p-value)</b> | <b>Ratio</b> | <b>Molecules</b>                                  |
|------------------------------------------------------------|----------------------|--------------|---------------------------------------------------|
| Circadian Rhythm Signaling                                 | 3,98                 | 0,13         | <i>Bhlhe41, Cry2, Per2, Arntl</i>                 |
| Androgen and Estrogen Metabolism                           | 1,97                 | 0,04         | <i>Sts, Csgalnact1, Arsb</i>                      |
| Glycosaminoglycan Degradation                              | 1,96                 | 0,08         | <i>Mgea5, Arsb</i>                                |
| Crosstalk between Dendritic Cells and Natural Killer Cells | 1,91                 | 0,04         | <i>Pvrl2, Hla-E, Camk2d</i>                       |
| Glycolysis/Gluconeogenesis                                 | 1,71                 | 0,04         | <i>Pdhx, Galm, Pfkp</i>                           |
| Tight Junction Signaling                                   | 1,63                 | 0,03         | <i>Pvrl2, Jam2, Myh14, Myh6</i>                   |
| Coagulation System                                         | 1,57                 | 0,06         | <i>F2r, Tfp1</i>                                  |
| Protein Ubiquitination Pathway                             | 1,54                 | 0,02         | <i>Hspa1a/Hspa1b, Birc3, Dnajb1, Dnaja1, Usp2</i> |
| Calcium Signaling                                          | 1,50                 | 0,02         | <i>Myh14, Myh6, Chrn4, Camk2d</i>                 |
| Alanine and Aspartate Metabolism                           | 1,50                 | 0,05         | <i>Pdhx, Asns</i>                                 |
| Galactose Metabolism                                       | 1,47                 | 0,05         | <i>Gaa, Pfkp</i>                                  |

**B- Hypothalamus**

| <b>Ingenuity Canonical Pathways</b>                       | <b>-log(p-value)</b> | <b>Ratio</b> | <b>Molecules</b>                  |
|-----------------------------------------------------------|----------------------|--------------|-----------------------------------|
| Circadian Rhythm Signaling                                | 3,86                 | 0,10         | <i>Cry1, Per2, Nr1d1</i>          |
| Cytotoxic T Lymphocyte-mediated Apoptosis of Target Cells | 3,67                 | 0,06         | <i>Casp8, Rt1-N2, Rt1-T24-3</i>   |
| Allograft Rejection Signaling                             | 2,34                 | 0,04         | <i>Rt1-N2, Rt1-T24-3</i>          |
| OX40 Signaling Pathway                                    | 2,10                 | 0,03         | <i>Rt1-N2, Rt1-T24-3</i>          |
| Endothelin-1 Signaling                                    | 1,97                 | 0,02         | <i>Gna14, Casp8, Pla2g3</i>       |
| Phospholipid Degradation                                  | 1,71                 | 0,02         | <i>Gna14, Pla2g3</i>              |
| Huntington's Disease Signaling                            | 1,60                 | 0,01         | <i>Hspa1a/Hspa1b, Casp8, Tgm2</i> |
| Apoptosis Signaling                                       | 1,54                 | 0,02         | <i>Casp8, Gas2</i>                |
| Atherosclerosis Signaling                                 | 1,48                 | 0,02         | <i>Apoa1, Pla2g3</i>              |
| Sphingosine-1-phosphate Signaling                         | 1,44                 | 0,02         | <i>Gna14, Casp8</i>               |
| Neuropathic Pain Signaling In Dorsal Horn Neurons         | 1,42                 | 0,02         | <i>Gna14, Camk1g</i>              |
| Cdc42 Signaling                                           | 1,38                 | 0,02         | <i>Rt1-N2, Rt1-T24-3</i>          |
| Glycerophospholipid Metabolism                            | 1,38                 | 0,02         | <i>Gna14, Pla2g3</i>              |
| Synaptic Long Term Depression                             | 1,30                 | 0,02         | <i>Gna14, Pla2g3</i>              |

**Supplemental table 9: List of genes regulated by LTMCR in the hypothalamus**

| Gene Symbol                     | Gene Title                                                         | RefSeq Transcript ID                                                             | Fold change | Gene Ontology Biological Process                                     |
|---------------------------------|--------------------------------------------------------------------|----------------------------------------------------------------------------------|-------------|----------------------------------------------------------------------|
| <b>Up-regulated</b>             |                                                                    |                                                                                  |             |                                                                      |
| <i>RT1-N1</i> /// <i>RT1-N2</i> | RT1 class Ib, locus N1 /// RT1 class Ib, locus N2                  | NM_001008854 /// NM_012646                                                       | <b>2,18</b> | immune response                                                      |
| <i>Nr4a3</i>                    | nuclear receptor subfamily 4, group A, member 3                    | NM_017352 /// NM_031628                                                          | <b>1,69</b> | mesoderm formation                                                   |
| <i>Hspa1a</i> /// <i>Hspa1b</i> | heat shock 70kD protein 1A /// heat shock 70kD protein 1B (mapped) | NM_031971 /// NM_212504                                                          | <b>1,56</b> | telomere maintenance                                                 |
| <i>Hspa1a</i>                   | heat shock 70kD protein 1A                                         | NM_031971                                                                        | <b>1,56</b> | telomere maintenance                                                 |
| <i>Fkbp5</i>                    | FK506 binding protein 5                                            | NM_001012174                                                                     | <b>1,49</b> | protein folding                                                      |
| <i>Gas2</i>                     | growth arrest-specific 2                                           | NM_001127504                                                                     | <b>1,49</b> | cell cycle arrest                                                    |
| <i>Tpr</i>                      | translocated promoter region                                       | NM_001107185                                                                     | <b>1,48</b> | translation                                                          |
| <i>DnaJ3</i>                    | DnaJ (Hsp40) homolog, subfamily A, member 3                        | NM_001038595 /// NM_001038596                                                    | <b>1,48</b> | mitochondrial DNA replication                                        |
| <i>Osgp</i>                     | O-sialoglycoprotein endopeptidase                                  | NM_001100510                                                                     | <b>1,47</b> | proteolysis                                                          |
| <i>Zbtb20</i>                   | zinc finger and BTB domain containing 20                           | NM_001105880                                                                     | <b>1,47</b> |                                                                      |
| <i>RT1-T24-3</i>                | RT1 class I, locus T24, gene 3                                     | NM_001166403                                                                     | <b>1,43</b> | immune response                                                      |
| <i>Per2</i>                     | period homolog 2 (Drosophila)                                      | NM_031678                                                                        | <b>1,43</b> | transcription                                                        |
| <i>Rbm3</i>                     | RNA binding motif (RNP1, RRM) protein 3                            | NM_053696                                                                        | <b>1,41</b> | translation                                                          |
| <i>Afmid</i>                    | arylformamidase                                                    | NM_001111366                                                                     | <b>1,40</b> | metabolic process                                                    |
| <i>Cry1</i>                     | cryptochrome 1 (photolyase-like)                                   | NM_198750                                                                        | <b>1,40</b> | DNA repair                                                           |
| <i>Gpatch4</i>                  | G patch domain containing 4                                        | NM_001024979                                                                     | <b>1,38</b> |                                                                      |
| <i>Ppp1r15b</i>                 | protein phosphatase 1, regulatory (inhibitor) subunit 15b          | NM_001107175                                                                     | <b>1,36</b> | response to stress                                                   |
| <i>Egr2</i>                     | early growth response 2                                            | NM_053633                                                                        | <b>1,35</b> | transcription                                                        |
| <i>Pdlim5</i>                   | PDZ and LIM domain 5                                               | NM_053326                                                                        | <b>1,35</b> | heart development                                                    |
| <i>Casp8</i>                    | caspase 8                                                          | NM_022277                                                                        | <b>1,35</b> | angiogenesis                                                         |
| <i>Tmem144</i>                  | transmembrane protein 144                                          | NM_001108551                                                                     | <b>1,34</b> |                                                                      |
| <i>Tle1</i>                     | transducin-like enhancer of split 1 (E(sp1) homolog, Drosophila)   | NM_001173433 /// XM_001066887 /// XM_002726541 /// XM_002726542 /// XM_002726543 | <b>1,34</b> | negative regulation of transcription from RNA polymerase II promoter |
| <i>Myst3</i>                    | MYST histone acetyltransferase (monocytic leukemia) 3              | NM_001100570                                                                     | <b>1,34</b> | nucleosome assembly                                                  |
| <i>Otud7b</i>                   | OTU domain containing 7B                                           | NM_001107697                                                                     | <b>1,34</b> | protein deubiquitination                                             |
| <i>Calcl</i>                    | calcitonin receptor-like                                           | NM_012717                                                                        | <b>1,34</b> | regulation of muscle contraction                                     |
| <i>Nhlrc3</i>                   | NHL repeat containing 3                                            | XM_001054658 /// XM_227139                                                       | <b>1,33</b> |                                                                      |
| <i>Gna14</i>                    | guanine nucleotide binding protein, alpha 14                       | NM_001013151                                                                     | <b>1,33</b> | protein ADP-ribosylation                                             |
| <i>Cd1d1</i>                    | CD1d1 molecule                                                     | NM_017079                                                                        | <b>1,32</b> | positive regulation of T cell mediated cytotoxicity                  |
| <i>Syt6</i>                     | synaptotagmin VI                                                   | NM_022191                                                                        | <b>1,32</b> | transport                                                            |
| <i>Pla2g3</i>                   | phospholipase A2, group III                                        | NM_001106015                                                                     | <b>1,32</b> | phospholipid metabolic process                                       |
| <i>Camk1g</i>                   | calcium/calmodulin-dependent protein kinase IG                     | NM_182842                                                                        | <b>1,31</b> | protein phosphorylation                                              |
| <i>Wfdc6a</i>                   | WAP four-disulfide core domain 6A                                  | XM_001062561 /// XM_002726295                                                    | <b>1,31</b> |                                                                      |
| <i>Tctn3</i>                    | tectonic family member 3                                           | XM_001053561 /// XM_220007                                                       | <b>1,31</b> |                                                                      |
| <i>Yy1</i>                      | YY1 transcription factor                                           | NM_173290                                                                        | <b>1,31</b> | regulation of transcription, DNA-dependent                           |
| <i>Prpf38b</i>                  | PRP38 pre-mRNA processing factor 38 (yeast) domain containing B    | NM_001024305                                                                     | <b>1,30</b> | mRNA processing                                                      |

## Down-regulated

|               |                                                          |                                                                                        |              |                                            |
|---------------|----------------------------------------------------------|----------------------------------------------------------------------------------------|--------------|--------------------------------------------|
| <i>Irf2</i>   | interferon regulatory factor 2                           | NM_001047086                                                                           | <b>-1,30</b> | regulation of transcription, DNA-dependent |
| <i>Apoa1</i>  | apolipoprotein A-I                                       | NM_012738                                                                              | <b>-1,31</b> | regulation of protein phosphorylation      |
| <i>Cartpt</i> | CART prepropeptide                                       | NM_017110                                                                              | <b>-1,33</b> | activation of MAPKK activity               |
| <i>Tgm2</i>   | transglutaminase 2, C polypeptide                        | NM_019386                                                                              | <b>-1,33</b> | blood vessel remodeling                    |
| <i>Lmf1</i>   | lipase maturation factor 1                               | XM_001060521 /// XM_340769                                                             | <b>-1,35</b> | protein secretion                          |
| <i>Vcan</i>   | versican                                                 | NM_001170558 /// NM_001170559 ///<br>NM_001170560 /// NM_053663 ///<br>XM_001058357 // | <b>-1,36</b> | ureteric bud development                   |
| <i>Nr1d1</i>  | nuclear receptor subfamily 1, group D, member 1          | NM_001113422 /// NM_145775                                                             | <b>-1,38</b> | transcription                              |
| <i>Opalin</i> | oligodendrocytic myelin paranodal and inner loop protein | NM_001017386                                                                           | <b>-1,41</b> |                                            |
| <i>Htra3</i>  | HtrA serine peptidase 3                                  | XM_001058037 /// XM_341237                                                             | <b>-1,44</b> | regulation of cell growth                  |
| <i>Nov</i>    | nephroblastoma overexpressed gene                        | NM_030868                                                                              | <b>-1,51</b> | regulation of cell growth                  |
| <i>Matn2</i>  | matrilin 2                                               | XM_001058523 /// XM_216941                                                             | <b>-1,62</b> |                                            |
| <i>Vof16</i>  | ischemia related factor vof-16                           | NM_147207                                                                              | <b>-2,25</b> |                                            |

\* *P* value = 0.029, was obtained by permutation analysis. Fold change  $\geq 1.3$ .

**Supplemental table 10: List of genes regulated by soy diet in the anterior pituitary**

**A- Anterior pituitary**

| Gene Symbol           | Gene Title                                                               | RefSeq Transcript ID                                                          | Fold change  | Gene Ontology Biological Process                                     |
|-----------------------|--------------------------------------------------------------------------|-------------------------------------------------------------------------------|--------------|----------------------------------------------------------------------|
| <b>Up-regulated</b>   |                                                                          |                                                                               |              |                                                                      |
| <i>Dusp26</i>         | dual specificity phosphatase 26 (putative)                               | NM_001012352                                                                  | <b>2,61</b>  | protein dephosphorylation                                            |
| <i>Sncg</i>           | synuclein, gamma (breast cancer-specific protein 1)                      | NM_031688                                                                     | <b>2,16</b>  | peripheral nervous system development                                |
| <i>Tspy14</i>         | TSPY-like 4                                                              | NM_001012075                                                                  | <b>1,69</b>  | nucleosome assembly                                                  |
| <i>Slc16a13</i>       | Solute carrier family 16, member 13 (monocarboxylic acid transporter 13) | NM_001005530                                                                  | <b>1,34</b>  | transport                                                            |
| <i>RT1-S3</i>         | RT1 class Ib, locus S3                                                   | NM_001008886                                                                  | <b>1,33</b>  | positive regulation of T cell mediated cytotoxicity                  |
| <i>Nckap1l</i>        | NCK associated protein 1 like                                            | NM_001108119                                                                  | <b>1,32</b>  | B cell homeostasis                                                   |
| <i>Plk5</i>           | polo-like kinase 5                                                       | NM_001170557 /// XM_001076512 /// XM_234920                                   | <b>1,32</b>  | protein phosphorylation                                              |
| <i>Rab33a</i>         | RAB33A, member of RAS oncogene family                                    | NM_001108257                                                                  | <b>1,32</b>  | small GTPase mediated signal transduction                            |
| <i>Dnmt3a</i>         | DNA (cytosine-5-)-methyltransferase 3 alpha                              | NM_001003957 /// NM_001003958                                                 | <b>1,31</b>  | negative regulation of transcription from RNA polymerase II promoter |
| <i>Hfe</i>            | hemochromatosis                                                          | NM_001173434 /// NM_001173435 /// NM_053301                                   | <b>1,30</b>  | antigen processing and presentation of peptide antigen via MHC class |
| <i>Fry</i>            | Furry homolog (Drosophila)                                               | NM_001170398                                                                  | <b>1,30</b>  |                                                                      |
| <b>Down-regulated</b> |                                                                          |                                                                               |              |                                                                      |
| <i>Robo2</i>          | roundabout, axon guidance receptor, homolog 2 (Drosophila)               | NM_032106                                                                     | <b>-2,20</b> | luteolysis                                                           |
| <i>Vegfa</i>          | vascular endothelial growth factor A                                     | NM_001110333 /// NM_001110334 /// NM_001110335 /// NM_001110336 /// NM_031836 | <b>-2,08</b> | angiogenesis                                                         |
| <i>Fam122b</i>        | family with sequence similarity 122B                                     | NM_001166586                                                                  | <b>-2,07</b> |                                                                      |
| <i>Lum</i>            | lumican                                                                  | NM_031050                                                                     | <b>-2,06</b> | response to organic cyclic substance                                 |
| <i>Nqo2</i>           | NAD(P)H dehydrogenase, quinone 2                                         | NM_001004214                                                                  | <b>-1,99</b> | memory                                                               |
| <i>Cgln1</i>          | cingulin-like 1                                                          | NM_001108164                                                                  | <b>-1,75</b> |                                                                      |
| <i>F2r</i>            | coagulation factor II (thrombin) receptor                                | NM_012950                                                                     | <b>-1,71</b> | activation of MAPKK activity                                         |
| <i>Cmb1</i>           | carboxymethylenebutenolidase homolog (Pseudomonas)                       | NM_001008770                                                                  | <b>-1,66</b> |                                                                      |
| <i>Retsat</i>         | retinol saturase (all trans retinol 13,14 reductase)                     | NM_145084                                                                     | <b>-1,59</b> | retinol metabolic process                                            |
| <i>Raph1</i>          | Ras association (RalGDS/AF-6) and pleckstrin homology domains 1          | NM_001108798                                                                  | <b>-1,58</b> | signal transduction                                                  |
| <i>Sec61a2</i>        | Sec61 alpha 2 subunit (S. cerevisiae)                                    | NM_001170343                                                                  | <b>-1,57</b> | transport                                                            |
| <i>Phka1</i>          | Phosphorylase kinase, alpha 1                                            | NM_022626                                                                     | <b>-1,57</b> | carbohydrate metabolic process                                       |

|                 |                                                                              |                                                |       |                                                                                                                              |
|-----------------|------------------------------------------------------------------------------|------------------------------------------------|-------|------------------------------------------------------------------------------------------------------------------------------|
| <i>Ehd3</i>     | EH-domain containing 3                                                       | NM_138890                                      | -1,54 | cAMP catabolic process<br>in utero embryonic development                                                                     |
| <i>Pde10a</i>   | phosphodiesterase 10A                                                        | NM_022236                                      | -1,54 |                                                                                                                              |
| <i>Gja1</i>     | gap junction protein, alpha 1                                                | NM_012567                                      | -1,53 |                                                                                                                              |
| <i>Clec16a</i>  | C-type lectin domain family 16, member A                                     | XM_002724483 /// XM_213209                     | -1,51 |                                                                                                                              |
| <i>Hrsp12</i>   | heat-responsive protein 12                                                   | NM_031714                                      | -1,47 | induction of apoptosis<br>cell adhesion<br>cation transport<br>proteolysis<br>protein methylation<br>blood vessel maturation |
| <i>Timp3</i>    | TIMP metalloproteinase inhibitor 3                                           | NM_012886                                      | -1,46 |                                                                                                                              |
| <i>Dsg2</i>     | desmoglein 2                                                                 | XM_001054396 /// XM_226112                     | -1,46 |                                                                                                                              |
| <i>Slc41a3</i>  | solute carrier family 41, member 3                                           | NM_001037492                                   | -1,45 |                                                                                                                              |
| <i>Npepl1</i>   | aminopeptidase-like 1                                                        | NM_001107806                                   | -1,45 |                                                                                                                              |
| <i>MGC72974</i> | hypothetical LOC316976                                                       | NM_198772                                      | -1,43 |                                                                                                                              |
| <i>Reck</i>     | reversion-inducing-cysteine-rich protein with kazal motifs                   | NM_001107954                                   | -1,43 |                                                                                                                              |
| <i>H2afj</i>    | H2A histone family, member J                                                 | NM_001109610                                   | -1,42 | nucleosome assembly<br>tricarboxylic acid cycle<br>G1 phase of mitotic cell cycle<br>cell cycle                              |
| <i>Aco1</i>     | aconitase 1, soluble                                                         | NM_017321                                      | -1,42 |                                                                                                                              |
| <i>Cdk1</i>     | cyclin-dependent kinase 1                                                    | NM_019296                                      | -1,41 |                                                                                                                              |
| <i>Cks2</i>     | CDC28 protein kinase regulatory subunit 2                                    | NM_001126083                                   | -1,40 |                                                                                                                              |
| <i>Ttc19</i>    | tetratricopeptide repeat domain 19                                           | NM_001109644                                   | -1,40 | carbohydrate metabolic process<br>regulation of cell growth                                                                  |
| <i>Ganab</i>    | glucosidase, alpha; neutral AB                                               | NM_001106334                                   | -1,39 |                                                                                                                              |
| <i>Hsd3b7</i>   | hydroxy-delta-5-steroid dehydrogenase, 3 beta- and steroid delta-isomerase 7 | NM_139329                                      | -1,38 |                                                                                                                              |
| <i>Ctps</i>     | CTP synthase                                                                 | NM_001134873                                   | -1,38 | pyrimidine nucleotide biosynthetic process<br>ovulation from ovarian follicle                                                |
| <i>Cbr1</i>     | carbonyl reductase 1 /// inducible carbonyl reductase-like                   | NM_019170 /// XM_002727460 /// XM_002727863    | -1,38 |                                                                                                                              |
| <i>Syngn2</i>   | synaptogyrin 2                                                               | NM_053553                                      | -1,37 | protein targeting<br>cell morphogenesis                                                                                      |
| <i>Atp2b2</i>   | ATPase, Ca++ transporting, plasma membrane 2                                 | NM_012508                                      | -1,36 |                                                                                                                              |
| <i>Cbfb</i>     | core-binding factor, beta subunit                                            | NM_001013191                                   | -1,36 | ossification<br>translation<br>DNA replication                                                                               |
| <i>Gfm1</i>     | G elongation factor, mitochondrial 1                                         | NM_053625                                      | -1,36 |                                                                                                                              |
| <i>Kctd13</i>   | potassium channel tetramerisation domain containing 13                       | NM_198736                                      | -1,36 |                                                                                                                              |
| <i>Lsm12</i>    | LSM12 homolog (S. cerevisiae)                                                | NM_001105843                                   | -1,36 | regulation of cell growth                                                                                                    |
| <i>Igfbp7</i>   | insulin-like growth factor binding protein 7                                 | NM_001013048                                   | -1,35 |                                                                                                                              |
| <i>Klc1</i>     | kinesin light chain 1                                                        | NM_001081972 /// NM_001081973 /// NM_001081974 | -1,35 | axon cargo transport                                                                                                         |
| <i>Dnajc30</i>  | DnaJ (Hsp40) homolog, subfamily C, member 30                                 | NM_001109024                                   | -1,35 |                                                                                                                              |
| <i>Ar</i>       | androgen receptor                                                            | NM_012502                                      | -1,35 | in utero embryonic development                                                                                               |
| <i>Zfyve27</i>  | zinc finger, FYVE domain containing 27                                       | NM_199104                                      | -1,35 |                                                                                                                              |
| <i>Snx7</i>     | sorting nexin 7                                                              | NM_001012083                                   | -1,35 | cell communication<br>respiratory system process<br>neuron migration<br>protein dephosphorylation                            |
| <i>Rab3a</i>    | RAB3A, member RAS oncogene family                                            | NM_013018                                      | -1,34 |                                                                                                                              |
| <i>Pex7</i>     | peroxisomal biogenesis factor 7                                              | NM_001034147                                   | -1,33 |                                                                                                                              |
| <i>Ptpn3</i>    | Protein tyrosine phosphatase, non-receptor type 3                            | XM_001055793 /// XM_001059757                  | -1,33 |                                                                                                                              |
| <i>Pcbp3</i>    | poly(rC) binding protein 3                                                   | NM_001011945                                   | -1,32 |                                                                                                                              |

|                |                                                                                        |              |       |                                |
|----------------|----------------------------------------------------------------------------------------|--------------|-------|--------------------------------|
| <i>Mtus1</i>   | mitochondrial tumor suppressor 1                                                       | NM_178093    | -1,32 | cell cycle                     |
| <i>Cd151</i>   | CD151 molecule (Raph blood group)                                                      | NM_022523    | -1,32 | hemidesmosome assembly         |
| <i>Polr2g</i>  | polymerase (RNA) II (DNA directed)<br>polypeptide G                                    | NM_053948    | -1,31 | transcription                  |
| <i>Vdac1</i>   | voltage-dependent anion channel 1                                                      | NM_031353    | -1,31 | behavioral fear response       |
| <i>Mthfd1</i>  | methylenetetrahydrofolate dehydrogenase<br>(NADP+ dependent) 1,<br>methenyltetrahydrof | NM_022508    | -1,30 | histidine biosynthetic process |
| <i>Racgap1</i> | Rac GTPase-activating protein 1                                                        | NM_001108112 | -1,30 | cytokinesis                    |
| <i>Mcart1</i>  | mitochondrial carrier triple repeat 1                                                  | NM_001024785 | -1,30 | transport                      |
| <i>Rbm18</i>   | RNA binding motif protein 18                                                           | NM_001107838 | -1,30 |                                |
| <i>Mrps18a</i> | mitochondrial ribosomal protein S18A                                                   | NM_198756    | -1,30 | translation                    |
| <i>Znrf2</i>   | zinc and ring finger 2                                                                 | NM_001108628 | -1,30 |                                |
| <i>Fktn</i>    | fukutin                                                                                | NM_001108667 | -1,30 |                                |
| <i>Cib2</i>    | calcium and integrin binding family<br>member 2                                        | NM_001015010 | -1,30 |                                |

## B-Hypothalamus

| Gene Symbol           | Gene Title                                                               | RefSeq Transcript ID       | Fold change | Gene Ontology Biological Process                |
|-----------------------|--------------------------------------------------------------------------|----------------------------|-------------|-------------------------------------------------|
| <b>Up-regulated</b>   |                                                                          |                            |             |                                                 |
| <i>Ero1l</i>          | ERO1-like (S. cerevisiae)                                                | NM_138528                  | 1,49        | protein folding                                 |
| <i>Fitm2</i>          | fat storage-inducing transmembrane<br>protein 2                          | NM_001107799               | 1,48        | regulation of triglyceride biosynthetic process |
| <i>Rexo4</i>          | REX4, RNA exonuclease 4 homolog (S.<br>cerevisiae)                       | NM_001033884               | 1,42        |                                                 |
| <i>Tspyl4</i>         | TSPY-like 4                                                              | NM_001012075               | 1,42        | nucleosome assembly                             |
| <i>Rprd1a</i>         | Regulation of nuclear pre-mRNA domain<br>containing 1A                   | XM_001056597 /// XM_214609 | 1,39        |                                                 |
| <i>Myst3</i>          | MYST histone acetyltransferase<br>(monocytic leukemia) 3                 | NM_001100570               | 1,38        | nucleosome assembly                             |
| <i>Tmem144</i>        | transmembrane protein 144                                                | NM_001108551               | 1,37        |                                                 |
| <i>Cit</i>            | Citron                                                                   | NM_001029911               | 1,35        | mitotic sister chromatid segregation            |
| <i>Pdyn</i>           | prodynorphin                                                             | NM_019374                  | 1,34        | neuropeptide signaling pathway                  |
| <i>Pop5</i>           | Processing of precursor 5, ribonuclease<br>P/MRP subunit (S. cerevisiae) | NM_001105752               | 1,33        | tRNA processing                                 |
| <i>Nf1</i>            | neurofibromin 1                                                          | NM_012609                  | 1,31        | MAPKKK cascade                                  |
| <i>Susd2</i>          | sushi domain containing 2                                                | NM_001106381               | 1,30        | immune response                                 |
| <b>Down-regulated</b> |                                                                          |                            |             |                                                 |
| <i>Coq10b</i>         | coenzyme Q10 homolog B (S. cerevisiae)                                   | NM_001009671               | -1,31       |                                                 |



|                |                          |              |              |                                                                      |
|----------------|--------------------------|--------------|--------------|----------------------------------------------------------------------|
| <i>Ston2</i>   | Stonin 2                 | NM_001135874 | <b>-1,39</b> | intracellular protein transport                                      |
| <i>Tnnc2</i>   | troponin C type 2 (fast) | NM_001037351 | <b>-1,41</b> | skeletal muscle contraction                                          |
| <i>Fmod</i>    | fibromodulin             | NM_080698    | <b>-1,47</b> | wound healing                                                        |
| <i>RT1-EC2</i> | RT1 class Ib, locus EC2  | NM_012645    | <b>-1,49</b> | antigen processing and presentation of peptide antigen via MHC class |

---

\* *P* value = 0.029, was obtained by permutation analysis. Fold change  $\geq 1.3$ .

**Supplemental table S11: List of genes regulated by soy, classified by biological functions**

**A- Anterior Pituitary**

| Category                                   | # of genes | P value           | Genes                                                                                                                           |
|--------------------------------------------|------------|-------------------|---------------------------------------------------------------------------------------------------------------------------------|
| Cellular Growth and Proliferation          | 19         | 3,28E-04-2,02E-02 | <i>Cbfb, F2r, Gja1, Timp3, Cks2, Vegfa, Sncg, Gfm1, Reck, Cdk1, Mthfd1, Mtus1, Vdac1, Ar, Cd151, Igfbp7, Lum, Ptpn3, Hsd3b7</i> |
| Cellular Assembly and Organization         | 17         | 1,49E-04-2,24E-02 | <i>Cbfb, F2r, Nckap1l, Gja1, Timp3, Vegfa, Sncg, Rab3a, Gfm1, Reck, Cdk1, Klc1, Vdac1, Robo2, Kctd13, Ar, Lum</i>               |
| Small Molecule Biochemistry                | 16         | 1,6E-03-2,34E-02  | <i>F2r, Aco1, Gja1, Vegfa, Sncg, Dnmt3a, Hfe, Cdk1, Mthfd1, Ctps, Vdac1, Ar, Igfbp7, Pex7, Atp2b2, Pde10a</i>                   |
| Cellular Movement                          | 15         | 1,49E-04-2,43E-02 | <i>F2r, Cbfb, Nckap1l, Gja1, Timp3, Vegfa, Sncg, Reck, Cdk1, Nqo2, Robo2, Ar, Cd151, Lum, Pex7</i>                              |
| Cellular Function and Maintenance          | 14         | 1,52E-04-2,31E-02 | <i>F2r, Gja1, Aco1, Timp3, Vegfa, Hla-E, Rab3a, Hfe, Cdk1, Vdac1, Ar, Cd151, Dsg2, Atp2b2</i>                                   |
| Cell Morphology                            | 14         | 2,02E-04-2E-02    | <i>F2r, Cbfb, Gja1, Timp3, Vegfa, Sncg, Racgap1, Reck, Robo2, Ar, Cd151, Igfbp7, Lum, Atp2b2</i>                                |
| Cell-To-Cell Signaling and Interaction     | 10         | 1,31E-03-2E-02    | <i>F2r, Timp3, Gja1, Vegfa, Sncg, Ar, Cd151, Rab3a, Dsg2, Vdac1</i>                                                             |
| Molecular Transport                        | 8          | 3,24E-03-2E-02    | <i>F2r, Gja1, Aco1, Hfe, Rab3a, Pde10a, Atp2b2, Vdac1</i>                                                                       |
| Cellular Development                       | 7          | 1,37E-03-2E-02    | <i>Timp3, Gja1, Vegfa, Ar, Gfm1, Igfbp7, Lum</i>                                                                                |
| Nucleic Acid Metabolism                    | 7          | 1,6E-03-2,06E-02  | <i>F2r, Gja1, Cdk1, Ctps, Pde10a, Atp2b2, Vdac1</i>                                                                             |
| Cell Cycle                                 | 7          | 2,52E-03-2,36E-02 | <i>Cks2, Vegfa, Ar, Igfbp7, Racgap1, Ttc19, Cdk1</i>                                                                            |
| Cell Signaling                             | 7          | 5,04E-03-1,63E-02 | <i>Nckap1l, Gja1, Vegfa, Hfe, Cdk1, Atp2b2, Vdac1</i>                                                                           |
| Gene Expression                            | 7          | 5,04E-03-2E-02    | <i>Cbfb, Aco1, Dnmt3a, Ar, Hrsp12, Cdk1, Dusp26</i>                                                                             |
| Cellular Compromise                        | 6          | 4,48E-03-1,5E-02  | <i>Gja1, Vegfa, Sncg, Ar, Hfe, Racgap1</i>                                                                                      |
| Cell Death                                 | 5          | 5,04E-03-2E-02    | <i>F2r, Gja1, Vegfa, Lum, Vdac1</i>                                                                                             |
| Lipid Metabolism                           | 4          | 2,87E-03-1,5E-02  | <i>F2r, Vegfa, Igfbp7, Pex7</i>                                                                                                 |
| Energy Production                          | 4          | 3,24E-03-2,06E-02 | <i>F2r, Gja1, Cdk1, Vdac1</i>                                                                                                   |
| Vitamin and Mineral Metabolism             | 4          | 5,04E-03-1,18E-02 | <i>Gja1, Vegfa, Atp2b2, Vdac1</i>                                                                                               |
| Protein Synthesis                          | 4          | 1E-02-1,63E-02    | <i>Nckap1l, Hrsp12, Hfe, Cdk1</i>                                                                                               |
| Antigen Presentation                       | 4          | 1,46E-02-1,5E-02  | <i>F2r, Nckap1l, Vegfa, Cd151</i>                                                                                               |
| Post-Translational Modification            | 4          | 1,5E-02-1,63E-02  | <i>Nckap1l, Vegfa, Hfe, Cdk1</i>                                                                                                |
| Carbohydrate Metabolism                    | 3          | 5,04E-03-1,5E-02  | <i>Aco1, Atp2b2, Vdac1</i>                                                                                                      |
| DNA Replication, Recombination, and Repair | 3          | 1E-02-2E-02       | <i>Vegfa, Dnmt3a, Cdk1</i>                                                                                                      |
| Drug Metabolism                            | 2          | 2,87E-03-2,87E-03 | <i>Vegfa, Igfbp7</i>                                                                                                            |
| RNA Post-Transcriptional Modification      | 2          | 7,51E-03-7,51E-03 | <i>Aco1, Cdk1</i>                                                                                                               |
| Amino Acid Metabolism                      | 2          | 2E-02-2,34E-02    | <i>Dnmt3a, Mthfd1</i>                                                                                                           |

**B- Hypothalamus**

| Category                                   | # of genes | P value           | Genes                          |
|--------------------------------------------|------------|-------------------|--------------------------------|
| Cellular Assembly and Organization         | 4          | 1,21E-03-4,14E-02 | <i>Ston2, Fmod, Nf1, Cit</i>   |
| Molecular Transport                        | 4          | 1,21E-03-4,72E-02 | <i>Nf1, Pdyn, Hla-C, Ero1l</i> |
| Cell Death                                 | 3          | 1,21E-03-3,09E-02 | <i>Fmod, Nf1, Hla-C</i>        |
| Cell-To-Cell Signaling and Interaction     | 3          | 1,21E-03-2,5E-02  | <i>Nf1, Pdyn, Hla-C</i>        |
| Cellular Growth and Proliferation          | 3          | 1,21E-03-4,72E-02 | <i>Nf1, Hla-C, Cit</i>         |
| Small Molecule Biochemistry                | 3          | 6,01E-03-2,03E-02 | <i>Nf1, Pdyn, Ero1l</i>        |
| Cellular Development                       | 3          | 9,61E-03-4,94E-02 | <i>Nf1, Cit, Ero1l</i>         |
| Cellular Compromise                        | 2          | 1,21E-03-2,15E-02 | <i>Pdyn, Cit</i>               |
| DNA Replication, Recombination, and Repair | 2          | 1,08E-02-1,44E-02 | <i>Kat6a, Cit</i>              |
| Cellular Function and Maintenance          | 2          | 3,09E-02-3,56E-02 | <i>Nf1, Cit</i>                |
