# Supplementary material
Source: publisher figshare collection journal article supplement (https://karger.figshare.com/articles/dataset/_/5123515)
Supplement: Supplementary file 2 [file 1]

**Supplemental table 7: List of genes regulated by caloric restriction, classified by biological functions**

**A- Anterior Pituitary**

| Category                                   | # of genes | P value           | Genes                                                                                                                                                                                                                                                                |
|--------------------------------------------|------------|-------------------|----------------------------------------------------------------------------------------------------------------------------------------------------------------------------------------------------------------------------------------------------------------------|
| Cell Death                                 | 35         | 5,22E-03-4,71E-02 | <i>Snca, Prr13, Camk2d, Taf10, Dnaja1, Klif6, Asns, Pvr12, Glrx, Laptm4b, Dnajb1, Rbm3, Adamts14, Jph3, F2r, Bag6, Shbg, Tfr, Aqp1, Hspa1a/Hspa1b, Hla-E, Dnase1, Tpsab1/Tpsb2, Wee1, Birc3, Lgals3bp, Pigf, Cacybp, Flnb, Nupr1, Xdh, Thy1, Usp2, Igfbp3, Atp5s</i> |
| Cellular Function and Maintenance          | 21         | 9,35E-04-4,71E-02 | <i>F2r, Myh14, Hspa1a/Hspa1b, Aqp1, Sorcs2, Tfr, Hla-E, Chmb4, Aqp4, Dnase1, Camk2d, Syn2, Dnaja1, Slc20a2, Myh6, Dnajb1, Gaa, Cd151, Nupr1, Xdh, Arst</i>                                                                                                           |
| Cell-To-Cell Signaling and Interaction     | 18         | 2,6E-04-4,71E-02  | <i>F2r, Serping1, Hspa1a/Hspa1b, Tfr, Snca, Chmb4, Syn2, Jam2, Pvr12, Birc3, Lgals3bp, Dfnb31, Tfp1, Cd151, Xdh, Thy1, Ptp4a3, Igfbp3</i>                                                                                                                            |
| Cellular Assembly and Organization         | 16         | 3,34E-03-4,71E-02 | <i>F2r, Myh14, Hspa1a/Hspa1b, Snca, Dnase1, Camk2d, Syn2, Dnaja1, Klc1, Pvr12, Myh6, Dnajb1, Gaa, Flnb, Xdh, Arst</i>                                                                                                                                                |
| Small Molecule Biochemistry                | 14         | 1,47E-04-4,71E-02 | <i>F2r, Slco3a1, Serping1, Aqp1, Snca, Tef, Csgalnact1, Dnaja1, Asns, Dnajb1, Tfp1, Xdh, Arsb, Igfbp3</i>                                                                                                                                                            |
| Cell Morphology                            | 13         | 3,78E-04-4,71E-02 | <i>F2r, Aqp1, Snca, Aqp4, Cenpb, Klc1, Pvr12, Elmo2, Cd151, Flnb, Xdh, Nupr1, Igfbp3</i>                                                                                                                                                                             |
| Cellular Compromise                        | 11         | 3,34E-03-4,71E-02 | <i>Pvr12, Hspa1a/Hspa1b, Aqp1, Snca, Dnajb1, Aqp4, Dnase1, Flnb, Dnaja1, Xdh, Klc1</i>                                                                                                                                                                               |
| Cellular Growth and Proliferation          | 11         | 8,01E-03-4,71E-02 | <i>F2r, Shbg, Hspa1a/Hspa1b, Tfr, Hla-E, Tpsab1/Tpsb2, Thy1, Klif6, Ptp4a3, Armt, Igfbp3</i>                                                                                                                                                                         |
| Molecular Transport                        | 10         | 3,78E-04-4,71E-02 | <i>Ppp1r10, Slco3a1, Tfr, Aqp1, Cry2, Aqp4, Dnaja1, Xdh, Igfbp3, Arst</i>                                                                                                                                                                                            |
| Cellular Development                       | 9          | 8,01E-03-4,07E-02 | <i>Pvr12, Shbg, Hspa1a/Hspa1b, Tfr, Aloxe3, Klif6, Thy1, Ptp4a3, Igfbp3</i>                                                                                                                                                                                          |
| Cellular Movement                          | 9          | 8,01E-03-3,94E-02 | <i>Pvr12, F2r, Myh14, Tfr, Snca, Cd151, Xdh, Ptp4a3, Igfbp3</i>                                                                                                                                                                                                      |
| Lipid Metabolism                           | 8          | 1,47E-04-4,71E-02 | <i>F2r, Slco3a1, Serping1, Snca, Dnajb1, Tef, Dnaja1, Xdh</i>                                                                                                                                                                                                        |
| Carbohydrate Metabolism                    | 7          | 8,01E-03-4,71E-02 | <i>F2r, Aqp1, Tfp1, Csgalnact1, Xdh, Pfkp, Arsb</i>                                                                                                                                                                                                                  |
| Drug Metabolism                            | 6          | 1,73E-03-4,71E-02 | <i>Glrx, Snca, Dnajb1, Tfp1, Dnaja1, Xdh</i>                                                                                                                                                                                                                         |
| Protein Synthesis                          | 5          | 3,78E-04-4,71E-02 | <i>Tfr, Aqp4, Taf10, Ehd3, Igfbp3</i>                                                                                                                                                                                                                                |
| Protein Trafficking                        | 5          | 3,78E-04-9,24E-03 | <i>Ppp1r10, Tfr, Cry2, Dnaja1, Igfbp3</i>                                                                                                                                                                                                                            |
| DNA Replication, Recombination, and Repair | 4          | 3,34E-03-4,71E-02 | <i>Hspa1a/Hspa1b, Dnajb1, Dnase1, Dnaja1</i>                                                                                                                                                                                                                         |
| Cell Cycle                                 | 4          | 8,01E-03-4,71E-02 | <i>Myh14, Hspa1a/Hspa1b, Wee1, Igfbp3</i>                                                                                                                                                                                                                            |
| Post-Translational Modification            | 3          | 5,44E-03-3,94E-02 | <i>Hspa1a/Hspa1b, Dnaja1, Xdh</i>                                                                                                                                                                                                                                    |
| Gene Expression                            | 3          | 8,01E-03-4,71E-02 | <i>Dnajb1, Taf10, Igfbp3</i>                                                                                                                                                                                                                                         |
| Protein Folding                            | 2          | 5,44E-03-5,44E-03 | <i>Hspa1a/Hspa1b, Dnaja1</i>                                                                                                                                                                                                                                         |
| Amino Acid Metabolism                      | 2          | 8,01E-03-4,71E-02 | <i>Asns, Igfbp3</i>                                                                                                                                                                                                                                                  |
| Nucleic Acid Metabolism                    | 2          | 8,01E-03-1,6E-02  | <i>Csgalnact1, Xdh</i>                                                                                                                                                                                                                                               |
| Cell Signaling                             | 2          | 2,1E-02-3,94E-02  | <i>Xdh, Igfbp3</i>                                                                                                                                                                                                                                                   |

**B- Hypothalamus**

| Category                                   | # of genes | P value           | Genes                                                                                                                                            |
|--------------------------------------------|------------|-------------------|--------------------------------------------------------------------------------------------------------------------------------------------------|
| Cellular Growth and Proliferation          | 19         | 3,18E-04-4,79E-02 | <i>Dnaja3, Nov, Apoa1, Irf2, Hspa1a/Hspa1b, Yy1, Nr1d1, Fkbp5, Cd1d, Cartpt, Tpr, Egr2, Vcan, Casp8, Calcr1, Rbm3, Nr4a3, Tgm2, Pla2g3</i>       |
| Cell Death                                 | 19         | 1,43E-03-4,93E-02 | <i>Dnaja3, Otud7b, Hspa1a/Hspa1b, Irf2, Apoa1, Yy1, Nr1d1, Fkbp5, Cd1d, Egr2, Camk1g, Vcan, Casp8, Calcr1, Rbm3, Nr4a3, Tgm2, Ppp1r15b, Gas2</i> |
| Cellular Development                       | 15         | 3,66E-04-4,54E-02 | <i>Dnaja3, Nov, Apoa1, Hspa1a/Hspa1b, Irf2, Yy1, Nr1d1, Cd1d, Cartpt, Egr2, Kat6a, Vcan, Casp8, Nr4a3, Tgm2</i>                                  |
| Cellular Movement                          | 15         | 3,26E-03-4,79E-02 | <i>Dnaja3, Nov, Hspa1a/Hspa1b, Apoa1, Yy1, Nr1d1, Cd1d, Tpr, Cartpt, Egr2, Vcan, Casp8, Calcr1, Nr4a3, Tgm2</i>                                  |
| Cell-To-Cell Signaling and Interaction     | 12         | 5,62E-04-4,79E-02 | <i>Dnaja3, Egr2, Hspa1a/Hspa1b, Vcan, Apoa1, Irf2, Casp8, Calcr1, Tgm2, Cd1d, Cartpt, Gas2</i>                                                   |
| Cellular Function and Maintenance          | 11         | 3,66E-04-4,47E-02 | <i>Dnaja3, Egr2, Hspa1a/Hspa1b, Apoa1, Irf2, Casp8, Syt6, Ppp1r15b, Tgm2, Cartpt, Cd1d</i>                                                       |
| Small Molecule Biochemistry                | 11         | 1,13E-03-4,79E-02 | <i>Irf2, Vcan, Apoa1, Casp8, Calcr1, Nr4a3, Fkbp5, Pla2g3, Tgm2, Cd1d, Cartpt</i>                                                                |
| Gene Expression                            | 11         | 9,76E-03-4,13E-02 | <i>Egr2, Kat6a, Irf2, Yy1, Casp8, Nr4a3, Nr1d1, Rbm3, Per2, Tgm2, Tle1</i>                                                                       |
| Cellular Assembly and Organization         | 10         | 1,37E-03-4,47E-02 | <i>Egr2, Dnaja3, Vcan, Apoa1, Hspa1a/Hspa1b, Casp8, Syt6, Fkbp5, Tgm2, Gas2</i>                                                                  |
| DNA Replication, Recombination, and Repair | 10         | 3,26E-03-3,78E-02 | <i>Dnaja3, Nov, Zbtb20, Kat6a, Hspa1a/Hspa1b, Irf2, Yy1, Casp8, Nr4a3, Tgm2</i>                                                                  |
| Lipid Metabolism                           | 8          | 1,13E-03-4,79E-02 | <i>Irf2, Apoa1, Casp8, Nr4a3, Fkbp5, Pla2g3, Cd1d, Cartpt</i>                                                                                    |
| Cell Signaling                             | 8          | 3,26E-03-3,53E-02 | <i>Dnaja3, Otud7b, Apoa1, Irf2, Casp8, Calcr1, Tgm2, Cartpt</i>                                                                                  |
| Cellular Compromise                        | 7          | 3,26E-03-4,47E-02 | <i>Hspa1a/Hspa1b, Irf2, Yy1, Casp8, Nr4a3, Tgm2, Gas2</i>                                                                                        |
| Molecular Transport                        | 7          | 3,26E-03-4,79E-02 | <i>Irf2, Apoa1, Syt6, Pla2g3, Tgm2, Tpr, Cartpt</i>                                                                                              |
| Cell Morphology                            | 6          | 1,66E-02-4,47E-02 | <i>Egr2, Dnaja3, Vcan, Casp8, Fkbp5, Tgm2</i>                                                                                                    |
| Carbohydrate Metabolism                    | 4          | 3,26E-03-3,85E-02 | <i>Apoa1, Pla2g3, Cd1d, Cartpt</i>                                                                                                               |
| Cell Cycle                                 | 4          | 3,26E-03-2,58E-02 | <i>Hspa1a/Hspa1b, Yy1, Nr4a3, Tpr</i>                                                                                                            |
| Protein Degradation                        | 4          | 1,69E-02-4,51E-02 | <i>Dnaja3, Apoa1, Casp8, Tgm2</i>                                                                                                                |
| Protein Synthesis                          | 4          | 1,69E-02-4,51E-02 | <i>Dnaja3, Apoa1, Casp8, Tgm2</i>                                                                                                                |
| Antigen Presentation                       | 3          | 5,62E-04-4,47E-02 | <i>Apoa1, Irf2, Tgm2</i>                                                                                                                         |
| Energy Production                          | 3          | 4,56E-03-1,63E-02 | <i>Apoa1, Nr4a3, Cartpt</i>                                                                                                                      |
| Nucleic Acid Metabolism                    | 3          | 1,96E-02-1,96E-02 | <i>Apoa1, Casp8, Calcr1</i>                                                                                                                      |
| Vitamin and Mineral Metabolism             | 2          | 6,51E-03-3,53E-02 | <i>Apoa1, Tgm2</i>                                                                                                                               |
| Drug Metabolism                            | 2          | 1,3E-02-4,47E-02  | <i>Fkbp5, Cartpt</i>                                                                                                                             |
| Post-Translational Modification            | 2          | 1,74E-02-4,47E-02 | <i>Dnaja3, Hspa1a/Hspa1b</i>                                                                                                                     |
| Protein Folding                            | 2          | 1,74E-02-4,47E-02 | <i>Dnaja3, Hspa1a/Hspa1b</i>                                                                                                                     |
| Amino Acid Metabolism                      | 2          | 1,94E-02-4,79E-02 | <i>Vcan, Cartpt</i>                                                                                                                              |
