# Supplementary material
Source: publisher figshare collection journal article supplement (https://karger.figshare.com/articles/dataset/_/5123515)
Supplement: Supplementary file 3 [file 1]

**Supplemental table 2: List of genes regulated by aging in the anterior pituitary**

| Gene Symbol         | Gene Title                                                          | RefSeq Transcript ID                                         | Fold change | Gene Ontology Biological Process                                     |
|---------------------|---------------------------------------------------------------------|--------------------------------------------------------------|-------------|----------------------------------------------------------------------|
| <b>Up-regulated</b> |                                                                     |                                                              |             |                                                                      |
| <i>Reg3b</i>        | regenerating islet-derived 3 beta                                   | NM_053289                                                    | <b>5,77</b> | acute-phase response                                                 |
| <i>Igha</i>         | immunoglobulin heavy chain, alpha                                   | ---                                                          | <b>5,41</b> |                                                                      |
| <i>Calcr</i>        | calcitonin receptor                                                 | NM_001034015 /// NM_053816                                   | <b>4,91</b> | signal transduction                                                  |
| <i>IgG-2a</i>       | gamma-2a immunoglobulin heavy chain                                 | XM_002726773                                                 | <b>3,88</b> |                                                                      |
| <i>C4-2 /// C4b</i> | complement component 4, gene 2 /// complement component 4B          | NM_001002805 /// NM_031504                                   | <b>3,51</b> | inflammatory response                                                |
| <i>Pcsk2</i>        | proprotein convertase subtilisin/kexin type 2                       | NM_012746                                                    | <b>3,42</b> | proteolysis                                                          |
| <i>Slc6a15</i>      | solute carrier family 6 (neutral amino acid transporter), member 15 | NM_172321                                                    | <b>3,33</b> | transport                                                            |
| <i>Olfm3</i>        | olfactomedin 3                                                      | NM_145777                                                    | <b>3,32</b> | eye photoreceptor cell development                                   |
| <i>Esm1</i>         | endothelial cell-specific molecule 1                                | NM_022604                                                    | <b>3,28</b> | regulation of cell growth                                            |
| <i>Krt25</i>        | keratin 25                                                          | NM_001008822                                                 | <b>3,22</b> | hair follicle morphogenesis                                          |
| <i>Apod</i>         | apolipoprotein D                                                    | NM_012777                                                    | <b>3,19</b> | transport                                                            |
| <i>Sez6</i>         | seizure related 6 homolog (mouse)                                   | NM_001105754 /// XM_001080832 /// XM_239260                  | <b>2,96</b> |                                                                      |
| <i>Igfbp3</i>       | insulin-like growth factor binding protein 3                        | NM_012588                                                    | <b>2,89</b> | regulation of cell growth                                            |
| <i>Reg3a</i>        | regenerating islet-derived 3 alpha                                  | NM_001145846 /// NM_172077                                   | <b>2,68</b> | acute-phase response                                                 |
| <i>Id3</i>          | inhibitor of DNA binding 3                                          | NM_013058                                                    | <b>2,67</b> | negative regulation of transcription from RNA polymerase II promoter |
| <i>Klk1b3</i>       | kallikrein 1-related peptidase b3                                   | NM_031523                                                    | <b>2,64</b> | proteolysis                                                          |
| <i>Tagln3</i>       | transgelin 3                                                        | NM_001035236 /// NM_031676                                   | <b>2,56</b> | muscle organ development                                             |
| <i>Gpx2</i>         | glutathione peroxidase 2                                            | NM_183403                                                    | <b>2,56</b> | temperature homeostasis                                              |
| <i>Akr1c19</i>      | aldo-keto reductase family 1, member C19                            | NM_001100576                                                 | <b>2,50</b> | oxidation reduction                                                  |
| <i>Syn2</i>         | synapsin II                                                         | NM_001034020 /// NM_019159                                   | <b>2,44</b> | neurotransmitter secretion                                           |
| <i>Cldn7</i>        | claudin 7                                                           | NM_031702                                                    | <b>2,40</b> | calcium-independent cell-cell adhesion                               |
| <i>C1qa</i>         | complement component 1, q subcomponent, A chain                     | NM_001008515                                                 | <b>2,37</b> | complement activation, classical pathway                             |
| <i>Nol3</i>         | nucleolar protein 3 (apoptosis repressor with CARD domain)          | NM_053516                                                    | <b>2,36</b> | response to hypoxia                                                  |
| <i>Igf1</i>         | insulin-like growth factor 1                                        | NM_001082477 /// NM_001082478 /// NM_001082479 /// NM_178866 | <b>2,32</b> | osteoblast differentiation                                           |
| <i>Cpxm2</i>        | carboxypeptidase X (M14 family), member 2                           | NM_001106306                                                 | <b>2,29</b> | proteolysis                                                          |
| <i>Rasd1</i>        | RAS, dexamethasone-induced 1                                        | XM_001077321 /// XM_340809                                   | <b>2,28</b> | signal transduction                                                  |
| <i>Serping1</i>     | serine (or cysteine) peptidase inhibitor, clade G, member 1         | NM_199093                                                    | <b>2,28</b> | negative regulation of complement activation, lectin pathway         |
| <i>Trhr</i>         | thyrotropin releasing hormone receptor                              | NM_013047                                                    | <b>2,26</b> | signal transduction                                                  |
| <i>Ascl1</i>        | achaete-scute complex homolog 1 (Drosophila)                        | NM_022384                                                    | <b>2,23</b> | neuron migration                                                     |
| <i>Lix1</i>         | Lix1 homolog (chicken)                                              | NM_001106214                                                 | <b>2,22</b> |                                                                      |
| <i>Ngb</i>          | neuroglobin                                                         | NM_033359                                                    | <b>2,21</b> | transport                                                            |
| <i>Gpnmb</i>        | glycoprotein (transmembrane) nmb                                    | NM_133298                                                    | <b>2,20</b> | osteoblast differentiation                                           |
| <i>Snca</i>         | synuclein, beta                                                     | NM_080777                                                    | <b>2,19</b> | dopamine metabolic process                                           |
| <i>Fmo5</i>         | flavin containing monooxygenase 5                                   | NM_144739                                                    | <b>2,19</b> | oxidation reduction                                                  |
| <i>Rgs5</i>         | regulator of G-protein signaling 5                                  | NM_019341                                                    | <b>2,16</b> | signal transduction                                                  |

|                 |                                                                                  |                                                                               |             |                                                                       |
|-----------------|----------------------------------------------------------------------------------|-------------------------------------------------------------------------------|-------------|-----------------------------------------------------------------------|
| <i>Lrrc4c</i>   | leucine rich repeat containing 4C                                                | NM_001107753                                                                  | <b>2,15</b> | regulation of axonogenesis                                            |
| <i>C1qc</i>     | complement component 1, q subcomponent, C chain                                  | NM_001008524                                                                  | <b>2,14</b> | complement activation, classical pathway                              |
| <i>Xdh</i>      | xanthine dehydrogenase                                                           | NM_017154                                                                     | <b>2,12</b> | lactation                                                             |
| <i>Nefh</i>     | neurofilament, heavy polypeptide                                                 | NM_012607                                                                     | <b>2,11</b> | microtubule cytoskeleton organization                                 |
| <i>Nol4</i>     | nucleolar protein 4                                                              | NM_001107401                                                                  | <b>2,11</b> |                                                                       |
| <i>Tmem229a</i> | transmembrane protein 229A                                                       | NM_001109480                                                                  | <b>2,10</b> |                                                                       |
| <i>Gfra3</i>    | GDNF family receptor alpha 3                                                     | NM_053398                                                                     | <b>2,09</b> | neuron migration                                                      |
| <i>Gucy1a3</i>  | guanylate cyclase 1, soluble, alpha 3                                            | NM_017090                                                                     | <b>2,08</b> | cGMP biosynthetic process                                             |
| <i>Lgals1</i>   | lectin, galactoside-binding, soluble, 1                                          | NM_019904                                                                     | <b>2,06</b> | negative regulation of cell-substrate adhesion                        |
| <i>Cys1</i>     | cystin 1                                                                         | NM_001109597                                                                  | <b>2,01</b> |                                                                       |
| <i>Nt5dc1</i>   | 5'-nucleotidase domain containing 1                                              | NM_001106393                                                                  | <b>1,99</b> |                                                                       |
| <i>Fcgr2a</i>   | Fc fragment of IgG, low affinity IIa, receptor (CD32) /// Fc gamma receptor II b | NM_001135992 /// NM_053843                                                    | <b>1,99</b> | antibody-dependent cellular cytotoxicity                              |
| <i>Htra1</i>    | HtrA serine peptidase 1                                                          | NM_031721                                                                     | <b>1,97</b> | regulation of cell growth                                             |
| <i>Apoe</i>     | apolipoprotein E                                                                 | NM_138828                                                                     | <b>1,95</b> | negative regulation of endothelial cell proliferation                 |
| <i>Suds3</i>    | Suppressor of defective silencing 3 homolog (S. cerevisiae)                      | XM_001080131 /// XM_341092                                                    | <b>1,95</b> | negative regulation of transcription                                  |
| <i>Pcdh19</i>   | protocadherin 19                                                                 | NM_001169129                                                                  | <b>1,95</b> | cell adhesion                                                         |
| <i>Myo1b</i>    | myosin Ib                                                                        | NM_053986                                                                     | <b>1,93</b> | nervous system development                                            |
| <i>Rnf180</i>   | ring finger protein 180                                                          | NM_001134986                                                                  | <b>1,93</b> | positive regulation of proteasomal ubiquitin-dependent protein catabo |
| <i>Gabra1</i>   | gamma-aminobutyric acid (GABA) A receptor, alpha 1                               | NM_183326                                                                     | <b>1,93</b> | transport                                                             |
| <i>Ptp4a3</i>   | protein tyrosine phosphatase 4a3                                                 | NM_001114405                                                                  | <b>1,93</b> | protein dephosphorylation                                             |
| <i>Crtac1</i>   | cartilage acidic protein 1                                                       | NM_134401                                                                     | <b>1,92</b> |                                                                       |
| <i>Mtmt1</i>    | Myotubularin related protein 1                                                   | NM_001191725 /// XM_001059230 /// XM_228644                                   | <b>1,91</b> | dephosphorylation                                                     |
| <i>Gabrg2</i>   | gamma-aminobutyric acid (GABA) A receptor, gamma 2                               | NM_183327                                                                     | <b>1,91</b> | transport                                                             |
| <i>Rhobtb3</i>  | Rho-related BTB domain containing 3                                              | NM_001107645                                                                  | <b>1,90</b> | retrograde transport, endosome to Golgi                               |
| <i>Ccdc88b</i>  | coiled-coil domain containing 88B                                                | NM_001108517                                                                  | <b>1,90</b> | protein phosphorylation                                               |
| <i>Plekhhb1</i> | pleckstrin homology domain containing, family B (evectins) member 1              | NM_172033                                                                     | <b>1,89</b> | regulation of cell differentiation                                    |
| <i>Cdcp1</i>    | CUB domain containing protein 1                                                  | NM_001106869                                                                  | <b>1,87</b> |                                                                       |
| <i>Retsat</i>   | retinol saturase (all trans retinol 13,14 reductase)                             | NM_145084                                                                     | <b>1,87</b> | retinol metabolic process                                             |
| <i>Brunol5</i>  | bruno-like 5, RNA binding protein (Drosophila)                                   | NM_001135603                                                                  | <b>1,87</b> |                                                                       |
| <i>Efh1</i>     | EF-hand domain family, member D1                                                 | NM_001109310                                                                  | <b>1,86</b> | neuron projection development                                         |
| <i>Gria4</i>    | glutamate receptor, ionotropic, AMPA4                                            | NM_001113184 /// NM_001113185 /// NM_017263                                   | <b>1,86</b> | transport                                                             |
| <i>Myo1d</i>    | myosin ID                                                                        | NM_012983                                                                     | <b>1,84</b> | transport                                                             |
| <i>Lppr5</i>    | lipid phosphate phosphatase-related protein type 5                               | NM_001107720                                                                  | <b>1,84</b> |                                                                       |
| <i>Ahcy12</i>   | adenosylhomocysteinase-like 2                                                    | NM_001173510 /// XM_001062287 /// XM_231564                                   | <b>1,84</b> | one-carbon metabolic process                                          |
| <i>Arsb</i>     | arylsulfatase B                                                                  | NM_033443                                                                     | <b>1,83</b> | autophagy                                                             |
| <i>Vegfa</i>    | vascular endothelial growth factor A                                             | NM_001110333 /// NM_001110334 /// NM_001110335 /// NM_001110336 /// NM_031836 | <b>1,82</b> | angiogenesis                                                          |
| <i>Adipoq</i>   | adiponectin, C1Q and collagen domain containing                                  | NM_144744                                                                     | <b>1,82</b> | response to hypoxia                                                   |
| <i>Agtr1b</i>   | angiotensin II receptor, type 1b                                                 | NM_031009                                                                     | <b>1,82</b> | blood vessel development                                              |

|                 |                                                                               |                                                                                  |             |                                                                       |
|-----------------|-------------------------------------------------------------------------------|----------------------------------------------------------------------------------|-------------|-----------------------------------------------------------------------|
| <i>Cdkn1c</i>   | cyclin-dependent kinase inhibitor 1C                                          | NM_001033757 /// NM_001033758 /// NM_182735                                      | <b>1,81</b> | negative regulation of transcription from RNA polymerase II promoter  |
| <i>Kitlg</i>    | KIT ligand                                                                    | NM_021843 /// NM_021844                                                          | <b>1,80</b> | ovarian follicle development                                          |
| <i>Gulp1</i>    | GULP, engulfment adaptor PTB domain containing 1                              | NM_001013171                                                                     | <b>1,79</b> | transport                                                             |
| <i>Atp2b3</i>   | ATPase, Ca++ transporting, plasma membrane 3                                  | NM_133288                                                                        | <b>1,79</b> | neural retina development                                             |
| <i>Cadps2</i>   | Ca++-dependent secretion activator 2                                          | XM_001060172 /// XM_002726328 /// XM_002726329 /// XM_002726330 /// XM_002726331 | <b>1,78</b> | positive regulation of exocytosis                                     |
| <i>Accn4</i>    | amiloride-sensitive cation channel 4, pituitary                               | NM_022234                                                                        | <b>1,77</b> | transport                                                             |
| <i>Khdrbs2</i>  | KH domain containing, RNA binding, signal transduction associated 2           | NM_133318                                                                        | <b>1,77</b> | transcription                                                         |
| <i>Aqp1</i>     | aquaporin 1                                                                   | NM_012778                                                                        | <b>1,77</b> | glomerular filtration                                                 |
| <i>Glrx1</i>    | glutaredoxin 1                                                                | NM_022278                                                                        | <b>1,77</b> | transport                                                             |
| <i>Sox4</i>     | SRY (sex determining region Y)-box 4                                          | XM_001068302 /// XM_344594                                                       | <b>1,77</b> | response to hypoxia                                                   |
| <i>Rimkb</i>    | ribosomal modification protein rimK-like family member B                      | XM_001060530 /// XM_342749                                                       | <b>1,76</b> | protein modification process                                          |
| <i>Plch2</i>    | Phospholipase C, eta 2                                                        | XM_001077247 /// XM_233728                                                       | <b>1,76</b> | lipid metabolic process                                               |
| <i>Ifitm1</i>   | interferon induced transmembrane protein 1                                    | NM_001106314                                                                     | <b>1,76</b> | response to biotic stimulus                                           |
| <i>Fcgrt</i>    | Fc fragment of IgG, receptor, transporter, alpha                              | NM_033351                                                                        | <b>1,75</b> | immune response                                                       |
| <i>Gpr162</i>   | G protein-coupled receptor 162                                                | NM_001108646                                                                     | <b>1,74</b> | G-protein coupled receptor protein signaling pathway                  |
| <i>Gabrd</i>    | gamma-aminobutyric acid (GABA) A receptor, delta                              | NM_017289                                                                        | <b>1,74</b> | transport                                                             |
| <i>Myh14</i>    | myosin, heavy chain 14                                                        | NM_001100690                                                                     | <b>1,73</b> | ATP catabolic process                                                 |
| <i>Dync1i1</i>  | dynein cytoplasmic 1 intermediate chain 1                                     | NM_019234                                                                        | <b>1,71</b> | transport                                                             |
| <i>Zbtb4</i>    | zinc finger and BTB domain containing 4                                       | XM_001079524 /// XM_220612                                                       | <b>1,71</b> |                                                                       |
| <i>Bend5</i>    | BEN domain containing 5                                                       | NM_001108672                                                                     | <b>1,71</b> |                                                                       |
| <i>Ssfa2</i>    | sperm specific antigen 2                                                      | NM_001107738                                                                     | <b>1,70</b> |                                                                       |
| <i>Ap1s2</i>    | adaptor-related protein complex 1, sigma 2 subunit                            | NM_001127531                                                                     | <b>1,69</b> | transport                                                             |
| <i>Pgcp</i>     | plasma glutamate carboxypeptidase                                             | NM_031640                                                                        | <b>1,68</b> | proteolysis                                                           |
| <i>Stmn2</i>    | stathmin-like 2                                                               | NM_053440                                                                        | <b>1,68</b> | negative regulation of microtubule depolymerization                   |
| <i>Igf2</i>     | insulin-like growth factor 2                                                  | NM_001190162 /// NM_001190163 /// NM_031511                                      | <b>1,68</b> | ossification                                                          |
| <i>Dgkb</i>     | diacylglycerol kinase, beta                                                   | NM_019304                                                                        | <b>1,68</b> | activation of protein kinase C activity by G-protein coupled receptor |
| <i>Ccdc30</i>   | coiled-coil domain containing 30                                              | XM_001073839 /// XM_342899                                                       | <b>1,68</b> | cell-matrix adhesion                                                  |
| <i>Fam151b</i>  | family with sequence similarity 151, member B                                 | NM_001134748                                                                     | <b>1,67</b> |                                                                       |
| <i>Cgnl1</i>    | cingulin-like 1                                                               | NM_001108164                                                                     | <b>1,67</b> |                                                                       |
| <i>Kcnq2</i>    | potassium voltage-gated channel, KQT-like subfamily, member 2                 | NM_133322                                                                        | <b>1,66</b> | transport                                                             |
| <i>C1qb</i>     | complement component 1, q subcomponent, B chain                               | NM_019262                                                                        | <b>1,66</b> | immune response                                                       |
| <i>Pah</i>      | phenylalanine hydroxylase                                                     | NM_012619                                                                        | <b>1,65</b> | L-phenylalanine metabolic process                                     |
| <i>Fos</i>      | FBJ osteosarcoma oncogene                                                     | NM_022197                                                                        | <b>1,65</b> | conditioned taste aversion                                            |
| <i>Cndp2</i>    | CNDP dipeptidase 2 (metallopeptidase M20 family)                              | NM_001010920                                                                     | <b>1,65</b> | proteolysis                                                           |
| <i>Sept_4</i>   | septin 4                                                                      | NM_001011893                                                                     | <b>1,64</b> | cell cycle                                                            |
| <i>Sh3kbp1</i>  | SH3-domain kinase binding protein 1                                           | NM_053360                                                                        | <b>1,64</b> | endocytosis                                                           |
| <i>Anxa4</i>    | annexin A4                                                                    | NM_024155                                                                        | <b>1,64</b> | exocytosis                                                            |
| <i>Lgals3bp</i> | lectin, galactoside-binding, soluble, 3 binding protein                       | NM_139096                                                                        | <b>1,64</b> | cell adhesion                                                         |
| <i>Cirbp</i>    | cold inducible RNA binding protein                                            | NM_031147                                                                        | <b>1,63</b> | response to stress                                                    |
| <i>Atp5s</i>    | ATP synthase, H+ transporting, mitochondrial F0 complex, subunit s (factor B) | NM_001007749                                                                     | <b>1,63</b> | ATP biosynthetic process                                              |

|               |                                                                              |                                                                 |      |                                            |
|---------------|------------------------------------------------------------------------------|-----------------------------------------------------------------|------|--------------------------------------------|
| <i>Hspb8</i>  | heat shock protein B8                                                        | NM_053612                                                       | 1,63 | response to stress                         |
| <i>Ubxn8</i>  | UBX domain protein 8                                                         | NM_001106086                                                    | 1,63 |                                            |
| <i>Palmd</i>  | palmdelphin                                                                  | NM_001025688                                                    | 1,62 | regulation of cell shape                   |
| <i>Ptpd</i>   | protein tyrosine phosphatase, receptor type, D                               | XM_001067936 /// XM_233065                                      | 1,62 | protein dephosphorylation                  |
| <i>Amn1</i>   | antagonist of mitotic exit network 1 homolog (S. cerevisiae)                 | NM_001008333                                                    | 1,62 |                                            |
| <i>Map2k6</i> | mitogen-activated protein kinase kinase 6                                    | NM_053703                                                       | 1,62 | MAPKKK cascade                             |
| <i>Rbbp9</i>  | retinoblastoma binding protein 9                                             | NM_019219                                                       | 1,62 | regulation of cell proliferation           |
| <i>Nup54</i>  | nucleoporin 54                                                               | NM_017361                                                       | 1,62 | protein targeting                          |
| <i>Pde1a</i>  | phosphodiesterase 1A, calmodulin-dependent                                   | NM_030871                                                       | 1,62 | cAMP catabolic process                     |
| <i>Gphn</i>   | gephyrin                                                                     | NM_022865                                                       | 1,62 | protein targeting                          |
| <i>F2r</i>    | coagulation factor II (thrombin) receptor                                    | NM_012950                                                       | 1,61 | activation of MAPKK activity               |
| <i>Ttyh1</i>  | tweety homolog 1 (Drosophila)                                                | NM_001106225                                                    | 1,61 | transport                                  |
| <i>Ccnd1</i>  | cyclin D1                                                                    | NM_171992                                                       | 1,61 | G1/S transition of mitotic cell cycle      |
| <i>Cmb1</i>   | carboxymethylenebutenolidase homolog (Pseudomonas)                           | NM_001008770                                                    | 1,61 |                                            |
| <i>Mlc1</i>   | megalencephalic leukoencephalopathy with subcortical cysts 1 homolog (human) | NM_001108105                                                    | 1,61 |                                            |
| <i>Ctss</i>   | cathepsin S                                                                  | NM_017320                                                       | 1,60 | proteolysis                                |
| <i>Ptgr1</i>  | prostaglandin reductase 1                                                    | NM_138863                                                       | 1,60 | metabolic process                          |
| <i>Flot1</i>  | flotillin 1                                                                  | NM_022701                                                       | 1,60 |                                            |
| <i>Cebpd</i>  | CCAAT/enhancer binding protein (C/EBP), delta                                | NM_013154                                                       | 1,60 | transcription                              |
| <i>Krt18</i>  | keratin 18                                                                   | NM_053976                                                       | 1,59 | apoptosis                                  |
| <i>Pdxp</i>   | pyridoxal (pyridoxine, vitamin B6) phosphatase                               | NM_001135819                                                    | 1,59 | metabolic process                          |
| <i>Ddx41</i>  | DEAD (Asp-Glu-Ala-Asp) box polypeptide 41                                    | NM_001108046                                                    | 1,59 |                                            |
| <i>Mmg2</i>   | membrane magnesium transporter 2                                             | NM_001013967                                                    | 1,59 | transport                                  |
| <i>Pex5l</i>  | peroxisomal biogenesis factor 5-like                                         | NM_173152                                                       | 1,59 | regulation of membrane potential           |
| <i>Tapbp</i>  | TAP binding protein                                                          | NM_033098                                                       | 1,58 | MHC class I protein complex assembly       |
| <i>Skap2</i>  | src kinase associated phosphoprotein 2                                       | NM_130413                                                       | 1,58 | negative regulation of cell proliferation  |
| <i>Tnr</i>    | tenascin R                                                                   | NM_013045                                                       | 1,58 | cell adhesion                              |
| <i>Npas2</i>  | neuronal PAS domain protein 2                                                | NM_001108214                                                    | 1,58 | regulation of transcription, DNA-dependent |
| <i>S100a6</i> | S100 calcium binding protein A6                                              | NM_053485                                                       | 1,58 |                                            |
| <i>Gpm6a</i>  | glycoprotein m6a                                                             | NM_178105                                                       | 1,58 |                                            |
| <i>Khl13</i>  | kelch-like 13 (Drosophila)                                                   | XM_001061200 /// XM_002727661 /// XM_002730180 /// XM_233297    | 1,57 | cytokinesis                                |
| <i>Soat1</i>  | sterol O-acyltransferase 1                                                   | NM_031118                                                       | 1,57 | lipid metabolic process                    |
| <i>Tgfb1</i>  | transforming growth factor, beta induced                                     | NM_053802                                                       | 1,57 | chondrocyte differentiation                |
| <i>Znf521</i> | zinc finger protein 521                                                      | NM_001107403                                                    | 1,57 |                                            |
| <i>Ppp4r2</i> | protein phosphatase 4, regulatory subunit 2                                  | NM_001106613                                                    | 1,57 |                                            |
| <i>Lrrc23</i> | leucine rich repeat containing 23                                            | NM_001013165                                                    | 1,57 |                                            |
| <i>Evl</i>    | Enah/Vasp-like                                                               | NM_024147                                                       | 1,57 | cellular component movement                |
| <i>Camta1</i> | similar to KIAA0833 protein                                                  | NM_001195559 /// NM_001195560 /// XM_002726619 /// XM_002729575 | 1,57 |                                            |
| <i>Pcbp3</i>  | poly(rC) binding protein 3                                                   | NM_001011945                                                    | 1,56 |                                            |
| <i>Zbtb22</i> | zinc finger and BTB domain containing 22                                     | NM_001009172                                                    | 1,56 |                                            |
| <i>Syne1</i>  | spectrin repeat containing, nuclear envelope 1                               | NM_001029909                                                    | 1,55 | Golgi organization                         |
| <i>Vipr2</i>  | vasoactive intestinal peptide receptor 2                                     | NM_017238                                                       | 1,55 | signal transduction                        |
| <i>Nosip</i>  | nitric oxide synthase interacting protein                                    | NM_001106260                                                    | 1,55 | negative regulation of catalytic activity  |
| <i>Fchsd2</i> | FCH and double SH3 domains 2                                                 | NM_001107539                                                    | 1,55 |                                            |

|                   |                                                                                |                                             |      |                                                                       |
|-------------------|--------------------------------------------------------------------------------|---------------------------------------------|------|-----------------------------------------------------------------------|
| <i>Kcnip4</i>     | Kv channel interacting protein 4                                               | NM_181365                                   | 1,55 | transport                                                             |
| <i>Pir</i>        | pirin (iron-binding nuclear protein)                                           | NM_001009474                                | 1,55 |                                                                       |
| <i>Xpa</i>        | xeroderma pigmentosum, complementation group A                                 | NM_001106656                                | 1,54 | nucleotide-excision repair, DNA damage removal                        |
| <i>Cdo1</i>       | cysteine dioxygenase, type I                                                   | NM_052809                                   | 1,54 | cysteine metabolic process                                            |
| <i>Rprm</i>       | represso, TP53 dependent G2 arrest mediator candidate                          | NM_001044276                                | 1,54 | cell cycle arrest                                                     |
| <i>Caly</i>       | calcyon neuron-specific vesicular protein                                      | NM_001190399 /// NM_138915                  | 1,54 | endocytosis                                                           |
| <i>Ehd3</i>       | EH-domain containing 3                                                         | NM_138890                                   | 1,54 |                                                                       |
| <i>Kcnd3</i>      | potassium voltage-gated channel, Shal-related subfamily, member 3              | NM_031739                                   | 1,54 | transport                                                             |
| <i>Rrm1</i>       | ribonucleotide reductase M1                                                    | NM_001013236                                | 1,53 | DNA replication                                                       |
| <i>Traf3ip2</i>   | Traf3 interacting protein 2                                                    | NM_001044248                                | 1,53 | B cell apoptosis                                                      |
| <i>Eid2b</i>      | EP300 interacting inhibitor of differentiation 2B                              | XM_002725600 /// XM_574407                  | 1,53 |                                                                       |
| <i>Id2</i>        | inhibitor of DNA binding 2                                                     | NM_013060                                   | 1,53 | negative regulation of transcription from RNA polymerase II promoter  |
| <i>Raph1</i>      | Ras association (RalGDS/AF-6) and pleckstrin homology domains 1                | NM_001108798                                | 1,53 | signal transduction                                                   |
| <i>Wfdc2</i>      | WAP four-disulfide core domain 2                                               | NM_173109                                   | 1,53 |                                                                       |
| <i>Tcf20</i>      | transcription factor 20                                                        | NM_001130574                                | 1,53 | positive regulation of gene-specific transcription from RNA polymeras |
| <i>Tspan8</i>     | tetraspanin 8                                                                  | NM_133526                                   | 1,53 | negative regulation of blood coagulation                              |
| <i>Tspo</i>       | translocator protein                                                           | NM_012515                                   | 1,53 | steroid biosynthetic process                                          |
| <i>Etv1</i>       | Ets variant 1                                                                  | NM_001108709 /// NM_001163156               | 1,53 | regulation of transcription, DNA-dependent                            |
| <i>Pcdhb9</i>     | protocadherin beta 9                                                           | NM_001109390                                | 1,53 | cell adhesion                                                         |
| <i>Hist2h2be</i>  | histone cluster 2, H2be                                                        | XM_001061909 /// XM_227459                  | 1,52 | nucleosome assembly                                                   |
| <i>Sorbs2</i>     | sorbin and SH3 domain containing 2                                             | NM_053770                                   | 1,52 |                                                                       |
| <i>Nfix</i>       | nuclear factor I/X (CCAAT-binding transcription factor)                        | NM_030866                                   | 1,52 | DNA replication                                                       |
| <i>Cpne5</i>      | copine V                                                                       | NM_001107616                                | 1,52 |                                                                       |
| <i>Tox3</i>       | TOX high mobility group box family member 3                                    | NM_001106171                                | 1,52 |                                                                       |
| <i>Zfhx4</i>      | zinc finger homeobox 4                                                         | NM_001191702 /// XM_001058915 /// XM_226964 | 1,52 | regulation of transcription, DNA-dependent                            |
| <i>Galm</i>       | galactose mutarotase (aldose 1-epimerase)                                      | NM_001007704                                | 1,52 | carbohydrate metabolic process                                        |
| <i>Rpa2</i>       | replication protein A2                                                         | NM_021582                                   | 1,52 | nucleotide-excision repair, DNA damage removal                        |
| <i>Klc3</i>       | kinesin light chain 3                                                          | NM_138520                                   | 1,52 | metabolic process                                                     |
| <i>Fam172a</i>    | family with sequence similarity 172, member A                                  | NM_001106401                                | 1,52 |                                                                       |
| <i>Csgalnact1</i> | chondroitin sulfate N-acetylgalactosaminyltransferase 1                        | NM_001107309                                | 1,51 | UDP-N-acetylgalactosamine metabolic process                           |
| <i>Slc12a5</i>    | solute carrier family 12 (potassium-chloride transporter), member 5            | NM_134363                                   | 1,51 | transport                                                             |
| <i>Gstz1</i>      | glutathione transferase zeta 1                                                 | NM_001109445                                | 1,51 | aromatic amino acid family metabolic process                          |
| <i>Chchd6</i>     | coiled-coil-helix-coiled-coil-helix domain containing 6                        | NM_001106608                                | 1,51 |                                                                       |
| <i>Pex7</i>       | peroxisomal biogenesis factor 7                                                | NM_001034147                                | 1,51 | neuron migration                                                      |
| <i>Fam117b</i>    | family with sequence similarity 117, member B                                  | NM_001108797                                | 1,50 |                                                                       |
| <i>Agtrap</i>     | angiotensin II receptor-associated protein                                     | NM_001007654                                | 1,50 | response to hypoxia                                                   |
| <i>Tipi</i>       | tissue factor pathway inhibitor (lipoprotein-associated coagulation inhibitor) | NM_001177321 /// NM_017200                  | 1,50 | blood coagulation                                                     |
| <i>Ppap2b</i>     | phosphatidic acid phosphatase type 2B                                          | NM_138905                                   | 1,50 | blood vessel development                                              |
| <i>Gpsm1</i>      | G-protein signaling modulator 1 (AGS3-like, C. elegans)                        | NM_001145469 /// NM_144745                  | 1,50 | signal transduction                                                   |

|                 |                                                                              |                                                |      |                                                                          |
|-----------------|------------------------------------------------------------------------------|------------------------------------------------|------|--------------------------------------------------------------------------|
| <i>Dpp6</i>     | dipeptidylpeptidase 6                                                        | NM_022850                                      | 1,50 | proteolysis                                                              |
| <i>Vangl1</i>   | vang-like 1 (van gogh, Drosophila)                                           | NM_001109584                                   | 1,49 | multicellular organismal development                                     |
| <i>Rab34</i>    | RAB34, member RAS oncogene family                                            | NM_001012140                                   | 1,49 | GTP catabolic process                                                    |
| <i>Ati1</i>     | atlastin GTPase 1                                                            | NM_001009831                                   | 1,49 | endoplasmic reticulum organization                                       |
| <i>H2afj</i>    | H2A histone family, member J                                                 | NM_001109610                                   | 1,49 | nucleosome assembly                                                      |
| <i>Capn1</i>    | calpain 1                                                                    | NM_019152                                      | 1,49 | proteolysis                                                              |
| <i>Fam110c</i>  | family with sequence similarity 110, member C                                | NM_001025051                                   | 1,49 |                                                                          |
| <i>Srbd1</i>    | S1 RNA binding domain 1                                                      | XM_001059624 /// XM_237474                     | 1,49 | nucleobase, nucleoside, nucleotide and nucleic acid<br>metabolic process |
| <i>Rfc4</i>     | replication factor C (activator 1) 4                                         | NM_001105869                                   | 1,49 | DNA replication                                                          |
| <i>Fam173a</i>  | family with sequence similarity 173, member A                                | NM_001127447                                   | 1,49 |                                                                          |
| <i>Cd82</i>     | Cd82 molecule                                                                | NM_031797                                      | 1,49 |                                                                          |
| <i>Med30</i>    | mediator complex subunit 30                                                  | NM_001130539                                   | 1,48 | transcription initiation from RNA polymerase II promoter                 |
| <i>Pcgf6</i>    | polycomb group ring finger 6                                                 | NM_001013154                                   | 1,48 | transcription                                                            |
| <i>Apbb1</i>    | amyloid beta (A4) precursor protein-binding, family B, member 1 (Fe65)       | NM_080478                                      | 1,48 | neuron migration                                                         |
| <i>Dnlz</i>     | DNL-type zinc finger                                                         | NM_001130990 /// NR_024073                     | 1,48 |                                                                          |
| <i>Jun</i>      | Jun oncogene                                                                 | NM_021835                                      | 1,48 | angiogenesis                                                             |
| <i>Efcab4a</i>  | EF-hand calcium binding domain 4A                                            | NM_001127541                                   | 1,47 | store-operated calcium entry                                             |
| <i>Pbxip1</i>   | pre-B-cell leukemia homeobox interacting protein 1                           | NM_001100976                                   | 1,47 |                                                                          |
| <i>Cpt1a</i>    | carnitine palmitoyltransferase 1a, liver                                     | NM_031559                                      | 1,47 | long-chain fatty acid metabolic process                                  |
| <i>Eef2k</i>    | eukaryotic elongation factor-2 kinase                                        | NM_012947                                      | 1,47 | protein phosphorylation                                                  |
| <i>Ntan1</i>    | N-terminal asparagine amidase                                                | NM_001025124                                   | 1,47 | memory                                                                   |
| <i>Bat5</i>     | HLA-B associated transcript 5                                                | NM_212531                                      | 1,47 |                                                                          |
| <i>Pde6d</i>    | phosphodiesterase 6D, cGMP-specific, rod, delta                              | NM_001108806                                   | 1,47 | visual perception                                                        |
| <i>Cadm1</i>    | cell adhesion molecule 1                                                     | NM_001012201                                   | 1,47 | liver development                                                        |
| <i>Ift81</i>    | intraflagellar transport 81 homolog (Chlamydomonas)                          | NM_199120                                      | 1,47 | multicellular organismal development                                     |
| <i>Rtn1</i>     | reticulon 1                                                                  | NM_053865                                      | 1,47 | neuron differentiation                                                   |
| <i>Kcnc2</i>    | potassium voltage gated channel, Shaw-related subfamily, member 2            | NM_139216 /// NM_139217                        | 1,47 | transport                                                                |
| <i>Tradd</i>    | TNFRSF1A-associated via death domain                                         | NM_001100480                                   | 1,47 | apoptosis                                                                |
| <i>Tmem106a</i> | transmembrane protein 106A                                                   | NM_001024967                                   | 1,47 |                                                                          |
| <i>Cfb</i>      | complement factor B                                                          | NM_212466                                      | 1,46 | proteolysis                                                              |
| <i>Rab3c</i>    | RAB3C, member RAS oncogene family                                            | NM_133536                                      | 1,46 | transport                                                                |
| <i>Slc43a2</i>  | solute carrier family 43, member 2                                           | NM_001105812                                   | 1,46 | amino acid transmembrane transport                                       |
| <i>Pcca</i>     | propionyl-coenzyme A carboxylase, alpha polypeptide                          | NM_019330                                      | 1,46 | metabolic process                                                        |
| <i>Rsbn1</i>    | round spermatid basic protein 1                                              | NM_001191710 /// XM_001065582 ///<br>XM_227540 | 1,46 |                                                                          |
| <i>Blcap</i>    | bladder cancer associated protein homolog (human)                            | NM_133582                                      | 1,46 | apoptosis                                                                |
| <i>Pm20d2</i>   | peptidase M20 domain containing 2                                            | NM_001107922                                   | 1,45 | metabolic process                                                        |
| <i>Amigo2</i>   | adhesion molecule with Ig like domain 2                                      | NM_182816                                      | 1,45 | anti-apoptosis                                                           |
| <i>Pcmt2</i>    | protein-L-isoaspartate (D-aspartate) O-methyltransferase domain containing 2 | NM_001107810                                   | 1,45 | protein modification process                                             |
| <i>Rgs10</i>    | regulator of G-protein signaling 10                                          | NM_019337                                      | 1,45 | regulation of G-protein coupled receptor protein signaling pathway       |
| <i>Rbmx</i>     | RNA binding motif protein, X-linked                                          | NM_001025663                                   | 1,45 | mRNA splice site selection                                               |
| <i>Ubxn6</i>    | UBX domain protein 6                                                         | NM_001108812                                   | 1,45 |                                                                          |
| <i>Nsdp1</i>    | nucleosomal binding protein 1                                                | NM_001134706                                   | 1,45 | transcription                                                            |
| <i>Prkcz</i>    | protein kinase C, zeta                                                       | NM_022507                                      | 1,45 | microtubule cytoskeleton organization                                    |

|                 |                                                           |                                                |      |                                                                      |
|-----------------|-----------------------------------------------------------|------------------------------------------------|------|----------------------------------------------------------------------|
| <i>Calhm2</i>   | calcium homeostasis modulator 2                           | NM_001008306                                   | 1,45 |                                                                      |
| <i>Meis1</i>    | Meis homeobox 1                                           | NM_001134702                                   | 1,45 | angiogenesis                                                         |
| <i>Ccl11</i>    | chemokine (C-C motif) ligand 11                           | NM_019205                                      | 1,45 | positive regulation of endothelial cell proliferation                |
| <i>Ccdc90b</i>  | coiled-coil domain containing 90B                         | NM_001024885                                   | 1,44 |                                                                      |
| <i>Apc2</i>     | adenomatosis polyposis coli 2                             | NM_001106769                                   | 1,44 | Wnt receptor signaling pathway                                       |
| <i>Dnajc12</i>  | DnaJ (Hsp40) homolog, subfamily C, member 12              | NM_001034032                                   | 1,44 |                                                                      |
| <i>Klc4</i>     | kinesin light chain 4                                     | NM_001009601                                   | 1,44 |                                                                      |
| <i>Fcho2</i>    | FCH domain only 2                                         | NM_001191632 /// XM_002728999 /// XM_219503    | 1,44 |                                                                      |
| <i>Aldh16a1</i> | aldehyde dehydrogenase 16 family, member A1               | NM_001033706                                   | 1,44 | metabolic process                                                    |
| <i>St18</i>     | suppression of tumorigenicity 18                          | NM_153310                                      | 1,44 | negative regulation of transcription from RNA polymerase II promoter |
| <i>Ifitm3</i>   | interferon induced transmembrane protein 3                | NM_001136124                                   | 1,44 | negative regulation of cell proliferation                            |
| <i>Rsrc1</i>    | arginine/serine-rich coiled-coil 1                        | NM_001014172                                   | 1,44 | alternative nuclear mRNA splicing, via spliceosome                   |
| <i>Syngr2</i>   | synaptogyrin 2                                            | NM_053553                                      | 1,43 | protein targeting                                                    |
| <i>Gpr149</i>   | G protein-coupled receptor 149                            | NM_138891                                      | 1,43 | signal transduction                                                  |
| <i>Ncor1</i>    | Nuclear receptor co-repressor 1                           | XM_001077495 /// XM_577103                     | 1,43 | negative regulation of transcription from RNA polymerase II promoter |
| <i>Znf467</i>   | zinc finger protein 467                                   | NM_001024327                                   | 1,43 | transcription                                                        |
| <i>Odf2l</i>    | outer dense fiber of sperm tails 2-like                   | NM_001134708                                   | 1,43 |                                                                      |
| <i>Ebna1bp2</i> | EBNA1 binding protein 2                                   | NM_001008721                                   | 1,43 |                                                                      |
| <i>Mettl7a</i>  | methyltransferase like 7A                                 | NM_001037355                                   | 1,43 | metabolic process                                                    |
| <i>Cnnm3</i>    | cyclin M3                                                 | NM_001106901                                   | 1,43 |                                                                      |
| <i>Tspan33</i>  | tetraspanin 33                                            | NM_001109227                                   | 1,43 |                                                                      |
| <i>Tob1</i>     | transducer of ErbB-2.1                                    | NM_133317                                      | 1,43 | SMAD protein nuclear translocation                                   |
| <i>Ctnnbl1</i>  | catenin, beta like 1                                      | NM_001024870                                   | 1,43 | apoptosis                                                            |
| <i>Klc1</i>     | kinesin light chain 1                                     | NM_001081972 /// NM_001081973 /// NM_001081974 | 1,43 | axon cargo transport                                                 |
| <i>Suclg2</i>   | succinate-CoA ligase, GDP-forming, beta subunit           | NM_001100750                                   | 1,43 | tricarboxylic acid cycle                                             |
| <i>Cd151</i>    | CD151 molecule (Raph blood group)                         | NM_022523                                      | 1,43 | hemidesmosome assembly                                               |
| <i>Sh3bgrl3</i> | SH3 domain binding glutamic acid-rich protein-like 3      | NM_001106688                                   | 1,43 | cell redox homeostasis                                               |
| <i>Gcnt2</i>    | glucosaminyl (N-acetyl) transferase 2, I-branching enzyme | NM_001001511                                   | 1,42 | metabolic process                                                    |
| <i>Hes1</i>     | hairy and enhancer of split 1 (Drosophila)                | NM_024360                                      | 1,42 | negative regulation of transcription from RNA polymerase II promoter |
| <i>Ltbp3</i>    | latent transforming growth factor beta binding protein 3  | NM_001191561 /// XM_002725776 /// XM_002728859 | 1,42 | skeletal system development                                          |
| <i>L1cam</i>    | L1 cell adhesion molecule                                 | NM_017345                                      | 1,42 | cell adhesion                                                        |
| <i>Arse</i>     | arylsulfatase E (chondrodysplasia punctata 1)             | NM_001047885                                   | 1,42 | metabolic process                                                    |
| <i>Rassf6</i>   | Ras association (RalGDS/AF-6) domain family member 6      | NM_001025671                                   | 1,42 | apoptosis                                                            |
| <i>Aif1</i>     | allograft inflammatory factor 1                           | NM_017196                                      | 1,42 | positive regulation of protein phosphorylation                       |
| <i>Eif5a2</i>   | eukaryotic translation initiation factor 5A2              | NM_001100697 /// XM_001063995 /// XM_226974    | 1,42 | translational frameshifting                                          |
| <i>Ryr2</i>     | ryanodine receptor 2, cardiac                             | NM_001191043 /// NM_032078                     | 1,42 | detection of calcium ion                                             |
| <i>B3galnt1</i> | beta-1,3-N-acetylgalactosaminyltransferase 1              | NM_001013158                                   | 1,42 | protein glycosylation                                                |
| <i>Rundc3b</i>  | RUN domain containing 3B                                  | NM_001047116                                   | 1,42 |                                                                      |
| <i>Ctbp2</i>    | C-terminal binding protein 2                              | NM_053335                                      | 1,42 | transcription                                                        |
| <i>Gpx4</i>     | glutathione peroxidase 4                                  | NM_001039849 /// NM_017165                     | 1,42 | chromatin organization                                               |

|                |                                                                                  |                                             |      |                                                                      |
|----------------|----------------------------------------------------------------------------------|---------------------------------------------|------|----------------------------------------------------------------------|
| <i>Fbxl4</i>   | F-box and leucine-rich repeat protein 4                                          | NM_001107919                                | 1,41 |                                                                      |
| <i>Slco3a1</i> | Solute carrier organic anion transporter family, member 3a1                      | NM_177481                                   | 1,41 | transport                                                            |
| <i>Bcap29</i>  | B-cell receptor-associated protein 29                                            | NM_001006980                                | 1,41 | intracellular protein transport                                      |
| <i>Ctsz</i>    | cathepsin Z                                                                      | NM_183330                                   | 1,41 | proteolysis                                                          |
| <i>Exoc2</i>   | exocyst complex component 2                                                      | NM_134414                                   | 1,41 | transport                                                            |
| <i>Camk2d</i>  | calcium/calmodulin-dependent protein kinase II delta                             | NM_012519                                   | 1,41 | G1/S transition of mitotic cell cycle                                |
| <i>Msl1</i>    | male-specific lethal 1 homolog (Drosophila)                                      | NM_001107048                                | 1,41 |                                                                      |
| <i>St6gal1</i> | ST6 beta-galactosamide alpha-2,6-sialyltransferase 1                             | NM_001113344 /// NM_147205                  | 1,41 | protein glycosylation                                                |
| <i>Aarsd1</i>  | alanyl-tRNA synthetase domain containing 1                                       | NM_001034109                                | 1,41 | translation                                                          |
| <i>Nme4</i>    | non-metastatic cells 4, protein expressed in                                     | NM_001109478                                | 1,41 | GTP biosynthetic process                                             |
| <i>Lmo4</i>    | LIM domain only 4                                                                | NM_001009708                                | 1,41 | neural tube closure                                                  |
| <i>Cadps</i>   | Ca++-dependent secretion activator                                               | NM_013219                                   | 1,41 | transport                                                            |
| <i>Lman2l</i>  | lectin, mannose-binding 2-like                                                   | NM_001106900                                | 1,41 | protein transport                                                    |
| <i>Pnpla2</i>  | patatin-like phospholipase domain containing 2                                   | NM_001108509                                | 1,41 | lipid metabolic process                                              |
| <i>Nrxn1</i>   | neurexin 1                                                                       | NM_021767                                   | 1,41 | cell adhesion                                                        |
| <i>Lrg1</i>    | leucine-rich alpha-2-glycoprotein 1                                              | NM_001009717                                | 1,41 | brown fat cell differentiation                                       |
| <i>Znf292</i>  | zinc finger protein 292                                                          | NM_001008879                                | 1,40 |                                                                      |
| <i>Camk1</i>   | calcium/calmodulin-dependent protein kinase I                                    | NM_134468                                   | 1,40 | protein phosphorylation                                              |
| <i>Vwc2</i>    | von Willebrand factor C domain containing 2                                      | NM_001109312                                | 1,40 | positive regulation of cell-substrate adhesion                       |
| <i>Ublcp1</i>  | ubiquitin-like domain containing CTD phosphatase 1                               | NM_001014117                                | 1,40 |                                                                      |
| <i>Mlh3</i>    | mutL homolog 3 (E. coli)                                                         | NM_001108043                                | 1,40 | mismatch repair                                                      |
| <i>Gstp1</i>   | glutathione S-transferase pi 1                                                   | NM_012577                                   | 1,40 | glutathione metabolic process                                        |
| <i>Chrac1</i>  | chromatin accessibility complex 1                                                | NM_001134880                                | 1,39 |                                                                      |
| <i>Hopx</i>    | HOP homeobox                                                                     | NM_133621                                   | 1,39 | negative regulation of transcription from RNA polymerase II promoter |
| <i>Fancl</i>   | Fanconi anemia, complementation group L                                          | NM_001191684 /// XM_001064256 /// XM_223701 | 1,39 | gamete generation                                                    |
| <i>Nudt14</i>  | nudix (nucleoside diphosphate linked moiety X)-type motif 14                     | NM_001106760                                | 1,39 |                                                                      |
| <i>Gtpbp10</i> | GTP-binding protein 10 (putative)                                                | NM_001100815                                | 1,39 |                                                                      |
| <i>Dlg3</i>    | discs, large homolog 3 (Drosophila)                                              | NM_031639                                   | 1,39 |                                                                      |
| <i>Grk6</i>    | G protein-coupled receptor kinase 6                                              | NM_001112712 /// NM_001112713 /// NM_031657 | 1,39 | protein phosphorylation                                              |
| <i>Mdga2</i>   | MAM domain containing glycosylphosphatidylinositol anchor 2                      | NM_199269                                   | 1,39 | spinal cord motor neuron differentiation                             |
| <i>Pdpf</i>    | pancreatic progenitor cell differentiation and proliferation factor homolog (zeb | NM_001009316                                | 1,39 | multicellular organismal development                                 |
| <i>Fam60a</i>  | family with sequence similarity 60, member A                                     | NM_001134711 /// NM_001134712               | 1,39 |                                                                      |
| <i>Sec16a</i>  | SEC16 homolog A (S. cerevisiae)                                                  | XM_002726072 /// XM_002729145               | 1,39 | lipid metabolic process                                              |
| <i>Acn9</i>    | ACN9 homolog (S. cerevisiae)                                                     | NM_001047914                                | 1,39 |                                                                      |
| <i>Inpp1</i>   | inositol polyphosphate-1-phosphatase                                             | NM_001012131                                | 1,39 |                                                                      |
| <i>Six1</i>    | SIX homeobox 1                                                                   | NM_053759                                   | 1,39 | ureteric bud development                                             |
| <i>Zc4h2</i>   | zinc finger, C4H2 domain containing                                              | NM_001126374                                | 1,38 |                                                                      |
| <i>Hbxip</i>   | hepatitis B virus x interacting protein                                          | NM_001106462                                | 1,38 | anti-apoptosis                                                       |
| <i>Snn</i>     | stannin                                                                          | NM_001034083                                | 1,38 |                                                                      |
| <i>Amigo1</i>  | adhesion molecule with Ig like domain 1                                          | NM_206881                                   | 1,38 | cell adhesion                                                        |
| <i>Znrf2</i>   | zinc and ring finger 2                                                           | NM_001108628                                | 1,38 |                                                                      |
| <i>Cenpv</i>   | centromere protein V                                                             | XM_002724504 /// XM_577104                  | 1,38 | metabolic process                                                    |



|                |                                                                                  |                                                                                     |             |                                                                      |
|----------------|----------------------------------------------------------------------------------|-------------------------------------------------------------------------------------|-------------|----------------------------------------------------------------------|
| <i>Hmgb3</i>   | high mobility group box 3                                                        | NM_001173341 /// XM_001067329 ///<br>XM_002727293 /// XM_002730310 ///<br>XM_223440 | <b>1,38</b> | negative regulation of B cell differentiation                        |
| <i>Nap1l3</i>  | nucleosome assembly protein 1-like 3                                             | NM_133402                                                                           | <b>1,38</b> | nucleosome assembly                                                  |
| <i>Nubp1</i>   | nucleotide binding protein 1                                                     | NM_001009619                                                                        | <b>1,38</b> | cellular iron ion homeostasis                                        |
| <i>Lrsam1</i>  | leucine rich repeat and sterile alpha motif containing 1                         | NM_001107833                                                                        | <b>1,38</b> | protein polyubiquitination                                           |
| <i>Xrcc5</i>   | X-ray repair complementing defective repair in Chinese hamster cells 5           | NM_177419                                                                           | <b>1,38</b> | double-strand break repair                                           |
| <i>Ccdc124</i> | coiled-coil domain containing 124                                                | NM_001106071                                                                        | <b>1,37</b> |                                                                      |
| <i>Tmem206</i> | transmembrane protein 206                                                        | NM_001007679                                                                        | <b>1,37</b> |                                                                      |
| <i>Pcgf2</i>   | polycomb group ring finger 2                                                     | NM_001105836                                                                        | <b>1,37</b> | negative regulation of transcription from RNA polymerase II promoter |
| <i>Lrrc20</i>  | leucine rich repeat containing 20                                                | NM_001109171                                                                        | <b>1,37</b> |                                                                      |
| <i>Dazap2</i>  | DAZ associated protein 2                                                         | NM_001013107                                                                        | <b>1,37</b> |                                                                      |
| <i>Hmg20b</i>  | high mobility group 20 B                                                         | NM_001108731                                                                        | <b>1,37</b> |                                                                      |
| <i>Mrpl44</i>  | mitochondrial ribosomal protein L44                                              | NM_001031650                                                                        | <b>1,37</b> | RNA processing                                                       |
| <i>Sts</i>     | steroid sulfatase                                                                | NM_012661                                                                           | <b>1,37</b> | lipid metabolic process                                              |
| <i>Calmod3</i> | calmodulin 3                                                                     | NM_012518                                                                           | <b>1,37</b> | muscle contraction                                                   |
| <i>Mllt6</i>   | Myeloid/lymphoid or mixed-lineage leukemia (trithorax homolog, Drosophila); tran | XM_001081378 /// XM_239329                                                          | <b>1,37</b> |                                                                      |
| <i>Ier3</i>    | immediate early response 3                                                       | NM_212505                                                                           | <b>1,37</b> |                                                                      |
| <i>Ptgr2</i>   | prostaglandin reductase 2                                                        | NM_001015009                                                                        | <b>1,37</b> | metabolic process                                                    |
| <i>Aatk</i>    | apoptosis-associated tyrosine kinase                                             | NM_001168703                                                                        | <b>1,37</b> | apoptosis                                                            |
| <i>Abcc3</i>   | ATP-binding cassette, sub-family C (CFTR/MRP), member 3                          | NM_080581                                                                           | <b>1,37</b> | transport                                                            |
| <i>Jmjd5</i>   | jumonji domain containing 5                                                      | NM_001037196                                                                        | <b>1,37</b> | G2/M transition of mitotic cell cycle                                |
| <i>Mfng</i>    | MFNG O-fucosylpeptide 3-beta-N-acetylglucosaminyltransferase                     | NM_199110                                                                           | <b>1,37</b> | pattern specification process                                        |
| <i>Ccdc52</i>  | coiled-coil domain containing 52                                                 | NM_001008285                                                                        | <b>1,37</b> | cell cycle                                                           |
| <i>Cast</i>    | calpastatin                                                                      | NM_001033715 /// NM_001033716 ///<br>NM_053295                                      | <b>1,37</b> | myoblast fusion                                                      |
| <i>Lias</i>    | lipoic acid synthetase                                                           | NM_001012037                                                                        | <b>1,37</b> | inflammatory response                                                |
| <i>Ccl2</i>    | chemokine (C-C motif) ligand 2                                                   | NM_031530                                                                           | <b>1,37</b> | response to hypoxia                                                  |
| <i>Tubb3</i>   | tubulin, beta 3                                                                  | NM_139254                                                                           | <b>1,37</b> | neuron migration                                                     |
| <i>Plscr3</i>  | phospholipid scramblase 3                                                        | NM_001012139                                                                        | <b>1,36</b> | glucose homeostasis                                                  |
| <i>Fuca2</i>   | fucosidase, alpha-L- 2, plasma                                                   | NM_001004218                                                                        | <b>1,36</b> | carbohydrate metabolic process                                       |
| <i>Prkcq</i>   | protein kinase C, theta                                                          | XM_001064127 /// XM_341553                                                          | <b>1,36</b> | response to hypoxia                                                  |
| <i>Arrdc2</i>  | arrestin domain containing 2                                                     | NM_001107303                                                                        | <b>1,36</b> | signal transduction                                                  |
| <i>Grik2</i>   | glutamate receptor, ionotropic, kainate 2                                        | NM_019309                                                                           | <b>1,36</b> | behavioral fear response                                             |
| <i>Aip</i>     | aryl-hydrocarbon receptor-interacting protein                                    | NM_172327                                                                           | <b>1,36</b> | protein folding                                                      |
| <i>Pdzd4</i>   | PDZ domain containing 4                                                          | NM_001135836                                                                        | <b>1,36</b> |                                                                      |
| <i>Rab7l1</i>  | RAB7, member RAS oncogene family-like 1                                          | NM_133590                                                                           | <b>1,36</b> | transport                                                            |
| <i>Banf1</i>   | barrier to autointegration factor 1                                              | NM_053631                                                                           | <b>1,36</b> | DNA integration                                                      |
| <i>Epc2</i>    | enhancer of polycomb homolog 2 (Drosophila)                                      | NM_001108581                                                                        | <b>1,36</b> |                                                                      |
| <i>Atp6ap2</i> | ATPase, H+ transporting, lysosomal accessory protein 2                           | XM_001060853 /// XM_217592                                                          | <b>1,36</b> | angiotensin maturation                                               |
| <i>Nek7</i>    | NIMA (never in mitosis gene a)-related kinase 7                                  | NM_001108346                                                                        | <b>1,36</b> | protein phosphorylation                                              |
| <i>Acot2</i>   | Acyl-CoA thioesterase 2                                                          | NM_138907                                                                           | <b>1,36</b> | very long-chain fatty acid metabolic process                         |

|                            |                                                                                  |                                                                                     |      |                                                       |
|----------------------------|----------------------------------------------------------------------------------|-------------------------------------------------------------------------------------|------|-------------------------------------------------------|
| <i>Rnf123</i>              | ring finger protein 123                                                          | NM_001191580 /// XM_002727136 ///<br>XM_002729963                                   | 1,35 |                                                       |
| <i>Tmem147</i>             | transmembrane protein 147                                                        | NM_001038494                                                                        | 1,35 |                                                       |
| <i>Podxl2</i>              | podocalyxin-like 2                                                               | NM_001106607                                                                        | 1,35 |                                                       |
| <i>Manbal</i>              | mannosidase, beta A, lysosomal-like                                              | NM_001173380 /// XM_001067976 ///<br>XM_002726286 /// XM_002729245 ///<br>XM_575279 | 1,35 |                                                       |
| <i>Atp6v1e1</i>            | ATPase, H+ transporting, lysosomal V1 subunit E1                                 | NM_198745                                                                           | 1,35 | ATP catabolic process                                 |
| <i>Ankrd40</i>             | ankyrin repeat domain 40                                                         | NM_001134699                                                                        | 1,35 |                                                       |
| <i>Rab25</i>               | RAB25, member RAS oncogene family                                                | NM_001107687                                                                        | 1,35 | small GTPase mediated signal transduction             |
| <i>Nacc2</i>               | nucleus accumbens associated 2, BEN and BTB (POZ) domain containing              | NM_001100533                                                                        | 1,35 |                                                       |
| <i>Fbxo23</i>              | F-box only protein 23                                                            | NM_001013138                                                                        | 1,35 |                                                       |
| <i>Kctd13</i>              | potassium channel tetramerisation domain containing 13                           | NM_198736                                                                           | 1,35 | DNA replication                                       |
| <i>Qsox2</i>               | quiescin Q6 sulfhydryl oxidase 2                                                 | NM_001109434                                                                        | 1,35 | cell redox homeostasis                                |
| <i>Tysnd1</i>              | trypsin domain containing 1                                                      | NM_001108932                                                                        | 1,35 | proteolysis                                           |
| <i>Mrpl54</i>              | mitochondrial ribosomal protein L54                                              | NM_001106770                                                                        | 1,35 |                                                       |
| <i>Reep6</i>               | receptor accessory protein 6                                                     | NM_001013218                                                                        | 1,34 |                                                       |
| <i>Timp2</i>               | TIMP metalloproteinase inhibitor 2                                               | NM_021989                                                                           | 1,34 | spermatogenesis                                       |
| <i>Igfbp1</i>              | immunoglobulin (CD79A) binding protein 1                                         | NM_031624                                                                           | 1,34 | response to biotic stimulus                           |
| <i>Ergic3</i>              | ERGIC and golgi 3                                                                | NM_001106533                                                                        | 1,34 |                                                       |
| <i>Pold4</i>               | polymerase (DNA-directed), delta 4                                               | NM_001013195                                                                        | 1,34 | positive regulation of endothelial cell proliferation |
| <i>Bloc1s1</i>             | biogenesis of lysosomal organelles complex-1, subunit 1                          | NM_001105941                                                                        | 1,34 | post-Golgi vesicle-mediated transport                 |
| <i>Ocl1</i>                | occludin/ELL domain containing 1                                                 | NM_001106065                                                                        | 1,34 |                                                       |
| <i>Aplp2</i>               | amyloid beta (A4) precursor-like protein 2                                       | XM_001056214 /// XM_343513                                                          | 1,34 | suckling behavior                                     |
| <i>Bdh1</i>                | 3-hydroxybutyrate dehydrogenase, type 1                                          | NM_053995                                                                           | 1,34 | liver development                                     |
| <i>Gba</i>                 | glucosidase, beta, acid                                                          | NM_001127639                                                                        | 1,34 | carbohydrate metabolic process                        |
| <i>Mrps18a</i>             | mitochondrial ribosomal protein S18A                                             | NM_198756                                                                           | 1,34 | translation                                           |
| <i>Gle1</i>                | GLE1 RNA export mediator homolog (yeast)                                         | NM_001025731                                                                        | 1,34 | transport                                             |
| <i>Pnkd</i>                | paroxysmal nonkinesigenic dyskinesia precursor)                                  | NM_001134750 /// NM_001134751 ///<br>NM_001134753                                   | 1,34 |                                                       |
| <i>Clpb</i>                | ClpB caseinolytic peptidase B homolog (E. coli)                                  | NM_022947                                                                           | 1,34 | cellular response to heat                             |
| <i>Stxbp1</i>              | syntaxin binding protein 1                                                       | NM_013038                                                                           | 1,34 | platelet degranulation                                |
| <i>Ift81</i>               | intraflagellar transport 81 homolog (Chlamydomonas)                              | NM_199120                                                                           | 1,34 | multicellular organismal development                  |
| <i>Snca</i>                | synuclein, alpha (non A4 component of amyloid precursor)                         | NM_019169                                                                           | 1,34 | microglial cell activation                            |
| <i>Tspan14</i>             | Tetraspanin 14                                                                   | NM_001169127                                                                        | 1,34 |                                                       |
| <i>Lactb2</i>              | lactamase, beta 2                                                                | NM_001024247                                                                        | 1,33 |                                                       |
| <i>Pnpt1</i>               | polyribonucleotide nucleotidyltransferase 1                                      | NM_001142371                                                                        | 1,33 | RNA processing                                        |
| <i>Tpp1</i>                | tripeptidyl peptidase I                                                          | NM_031357                                                                           | 1,33 | proteolysis                                           |
| <i>Gstm1</i>               | glutathione S-transferase mu 1                                                   | NM_017014                                                                           | 1,33 | glutathione metabolic process                         |
| <i>Coro1a</i>              | coronin, actin binding protein 1A                                                | NM_130411                                                                           | 1,33 | phagolysosome assembly                                |
| <i>Vtn</i>                 | vitronectin                                                                      | NM_019156                                                                           | 1,33 | immune response                                       |
| <i>Dhx16</i>               | DEAH (Asp-Glu-Ala-His) box polypeptide 16                                        | NM_212496                                                                           | 1,33 |                                                       |
| <i>Rsp9</i>                | radial spoke head 9 homolog (Chlamydomonas)                                      | NM_001108205                                                                        | 1,33 | cilium movement                                       |
| <i>Setd8 /// Setd8-ps1</i> | SET domain containing (lysine methyltransferase) 8 /// SET domain containing (ly | XM_001072149 /// XM_002724818 ///<br>XM_573394                                      | 1,33 | negative regulation of transcription                  |

|                               |                                                                                         |                                             |      |                                                        |
|-------------------------------|-----------------------------------------------------------------------------------------|---------------------------------------------|------|--------------------------------------------------------|
| <i>Cdkn2c</i>                 | cyclin-dependent kinase inhibitor 2C (p18, inhibits CDK4)                               | NM_131902                                   | 1,33 | regulation of cyclin-dependent protein kinase activity |
| <i>Clns1a</i>                 | chloride channel, nucleotide-sensitive, 1A                                              | NM_031719                                   | 1,33 | spliceosomal snRNP assembly                            |
| <i>Sqstm1</i>                 | sequestosome 1                                                                          | NM_175843 /// NM_181550                     | 1,33 | positive regulation of protein phosphorylation         |
| <i>Atrx</i>                   | alpha thalassemia/mental retardation syndrome X-linked (RAD54 homolog, <i>S. cerevi</i> | NM_001105757                                | 1,33 | DNA repair                                             |
| <i>Atp9a</i> /// <i>Atp9b</i> | ATPase, class II, type 9A /// ATPase, class II, type 9B                                 | NM_001106130 /// XM_002726282               | 1,33 | ATP biosynthetic process                               |
| <i>Sepp1</i>                  | selenoprotein P, plasma, 1                                                              | NM_001083911 /// NM_019192                  | 1,33 | selenium metabolic process                             |
| <i>Jmjd8</i>                  | jumonji domain containing 8                                                             | NM_001014116                                | 1,33 |                                                        |
| <i>Tmem192</i>                | transmembrane protein 192                                                               | NM_001014141                                | 1,33 |                                                        |
| <i>Polr2g</i>                 | polymerase (RNA) II (DNA directed) polypeptide G                                        | NM_053948                                   | 1,33 | transcription                                          |
| <i>Tm7sf3</i>                 | transmembrane 7 superfamily member 3                                                    | NM_001011970                                | 1,33 |                                                        |
| <i>Bsn</i>                    | bassoon                                                                                 | NM_019146                                   | 1,33 | cytoskeleton organization                              |
| <i>Vrk1</i>                   | vaccinia related kinase 1                                                               | NM_001012194                                | 1,33 | protein phosphorylation                                |
| <i>Hsd17b12</i>               | hydroxysteroid (17-beta) dehydrogenase 12                                               | NM_032066                                   | 1,32 | steroid biosynthetic process                           |
| <i>Camk2n1</i>                | Calcium/calmodulin-dependent protein kinase II inhibitor 1                              | NM_173337                                   | 1,32 | synaptic transmission                                  |
| <i>Dnajc27</i>                | DnaJ (Hsp40) homolog, subfamily C, member 27                                            | NM_206845                                   | 1,32 | small GTPase mediated signal transduction              |
| <i>Rnf44</i>                  | Ring finger protein 44                                                                  | NM_001024795                                | 1,32 |                                                        |
| <i>Gfm1</i>                   | G elongation factor, mitochondrial 1                                                    | NM_053625                                   | 1,32 | translation                                            |
| <i>Dctn6</i>                  | dynactin 6                                                                              | NM_001106085                                | 1,32 |                                                        |
| <i>Cenpq</i>                  | centromere protein Q                                                                    | NM_001014215                                | 1,32 |                                                        |
| <i>Chid1</i>                  | chitinase domain containing 1                                                           | NM_001047854                                | 1,32 | carbohydrate metabolic process                         |
| <i>Cep70</i>                  | centrosomal protein 70kDa                                                               | NM_001017470                                | 1,32 |                                                        |
| <i>Adh5</i>                   | alcohol dehydrogenase 5                                                                 | NM_001126120                                | 1,32 | retinoid metabolic process                             |
| <i>Igfbp7</i>                 | insulin-like growth factor binding protein 7                                            | NM_001013048                                | 1,32 | regulation of cell growth                              |
| <i>Bin3</i>                   | bridging integrator 3                                                                   | NM_001013186                                | 1,32 | barrier septum formation                               |
| <i>Smyd4</i>                  | SET and MYND domain containing 4                                                        | NM_001105810                                | 1,32 |                                                        |
| <i>Cspg5</i>                  | chondroitin sulfate proteoglycan 5                                                      | NM_019284 /// NM_133652                     | 1,32 | multicellular organismal development                   |
| <i>Rabac1</i>                 | Rab acceptor 1 (prenylated)                                                             | NM_031774                                   | 1,32 | vesicle-mediated transport                             |
| <i>Plekhhg5</i>               | pleckstrin homology domain containing, family G (with RhoGef domain) member 5           | NM_201272                                   | 1,32 | apoptosis                                              |
| <i>Pcna</i>                   | proliferating cell nuclear antigen                                                      | NM_022381                                   | 1,32 | DNA replication                                        |
| <i>Gltscr2</i>                | glioma tumor suppressor candidate region gene 2                                         | NM_207591                                   | 1,32 |                                                        |
| <i>Crbn</i>                   | cereblon                                                                                | NM_001015003                                | 1,32 | proteolysis                                            |
| <i>Nsg2</i>                   | neuron specific gene family member 2                                                    | NM_001034152                                | 1,32 | dopamine receptor signaling pathway                    |
| <i>Mapkapk5</i>               | mitogen-activated protein kinase-activated protein kinase 5                             | NM_001025761 /// NM_001164043               | 1,32 | protein phosphorylation                                |
| <i>Tmem59l</i>                | transmembrane protein 59-like                                                           | XM_001067996 /// XM_224729                  | 1,32 |                                                        |
| <i>Cnot8</i>                  | CCR4-NOT transcription complex, subunit 8                                               | NM_001008382                                | 1,32 |                                                        |
| <i>Commf7</i>                 | COMM domain containing 7                                                                | NM_001030029                                | 1,32 | negative regulation of transcription                   |
| <i>Phf20</i>                  | PHD finger protein 20                                                                   | NM_001107795                                | 1,32 |                                                        |
| <i>Cdk5rap2</i>               | CDK5 regulatory subunit associated protein 2                                            | NM_173134 /// XM_001059116 /// XM_575844    | 1,31 | microtubule cytoskeleton organization                  |
| <i>Lxn</i>                    | latexin                                                                                 | NM_031655                                   | 1,31 | negative regulation of endopeptidase activity          |
| <i>Mtus1</i>                  | mitochondrial tumor suppressor 1                                                        | NM_178093                                   | 1,31 | cell cycle                                             |
| <i>Mex3b</i>                  | mex3 homolog B ( <i>C. elegans</i> )                                                    | NM_001191626 /// XM_001068105 /// XM_218846 | 1,31 |                                                        |

|                            |                                                                                  |                                                                            |       |                                                                      |
|----------------------------|----------------------------------------------------------------------------------|----------------------------------------------------------------------------|-------|----------------------------------------------------------------------|
| <i>Cyth2</i>               | cytohesin 2                                                                      | NM_053911                                                                  | 1,31  | dendrite development                                                 |
| <i>Tmpo</i>                | thymopoietin                                                                     | NM_012887                                                                  | 1,31  | nuclear envelope reassembly                                          |
| <i>Eif2b3</i>              | eukaryotic translation initiation factor 2B, subunit 3<br>gamma                  | NM_133609                                                                  | 1,31  | translation                                                          |
| <i>Tcf19</i>               | transcription factor 19                                                          | NM_213561                                                                  | 1,31  |                                                                      |
| <i>H3f3b</i>               | H3 histone, family 3B                                                            | NM_053985                                                                  | 1,31  | nucleosome assembly                                                  |
| <i>Tusc2</i>               | tumor suppressor candidate 2                                                     | NM_001109297                                                               | 1,31  |                                                                      |
| <i>Rnf208</i>              | ring finger protein 208                                                          | NM_001109195                                                               | 1,31  |                                                                      |
| <i>Tmem176a</i>            | transmembrane protein 176A                                                       | NM_001039008                                                               | 1,31  |                                                                      |
| <i>Tspan6</i>              | tetraspanin 6                                                                    | NM_001100672                                                               | 1,31  | positive regulation of I-kappaB kinase/NF-kappaB cascade             |
| <i>Exoc7</i>               | exocyst complex component 7                                                      | NM_022691                                                                  | 1,31  | transport                                                            |
| <i>Ephx1</i>               | epoxide hydrolase 1, microsomal                                                  | NM_001034090 /// NM_012844                                                 | 1,31  | cellular aromatic compound metabolic process                         |
| <i>Zfp91</i>               | zinc finger protein 91                                                           | NM_001169120                                                               | 1,31  |                                                                      |
| <i>Wdr8</i>                | WD repeat domain 8                                                               | NM_001014262                                                               | 1,31  |                                                                      |
| <i>Prdm2</i>               | PR domain containing 2, with ZNF domain                                          | NM_001077648                                                               | 1,31  | transcription                                                        |
| <i>Alkbh2</i>              | alkB, alkylation repair homolog 2 (E. coli)                                      | NM_001126273                                                               | 1,31  | DNA dealkylation involved in DNA repair                              |
| <i>Sil1</i>                | SIL1 homolog, endoplasmic reticulum chaperone (S. cerevisiae)                    | NM_199376                                                                  | 1,31  | transport                                                            |
| <i>Morn1</i>               | MORN repeat containing 1                                                         | NM_001005544                                                               | 1,31  |                                                                      |
| <i>Spata6</i>              | spermatogenesis associated 6                                                     | NM_134392                                                                  | 1,31  | multicellular organismal development                                 |
| <i>Stmn1</i>               | stathmin 1                                                                       | NM_017166                                                                  | 1,31  | microtubule depolymerization                                         |
| <i>Tnfrsf12</i>            | tumor necrosis factor ligand superfamily member 12                               | NM_001001513                                                               | 1,31  | immune response                                                      |
| <i>Slpi</i>                | secretory leukocyte peptidase inhibitor                                          | NM_053372                                                                  | 1,31  |                                                                      |
| <i>Snx9</i>                | sorting nexin 9                                                                  | NM_001127637                                                               | 1,31  | cell communication                                                   |
| <i>Abhd8</i>               | abhydrolase domain containing 8                                                  | NM_001107301                                                               | 1,30  |                                                                      |
| <i>Ddx20</i>               | DEAD (Asp-Glu-Ala-Asp) box polypeptide 20                                        | NM_001191711 /// XM_001066705 /// XM_227558                                | 1,30  | negative regulation of transcription from RNA polymerase II promoter |
| <i>Mllt4</i>               | myeloid/lymphoid or mixed-lineage leukemia (trithorax homolog, Drosophila); tran | NM_013217                                                                  | 1,30  | cell adhesion                                                        |
| <i>Parl</i>                | presenilin associated, rhomboid-like                                             | NM_001035249                                                               | 1,30  |                                                                      |
| <i>Decr2 /// Rab11fip3</i> | 2,4-dienoyl CoA reductase 2, peroxisomal /// RAB11 family interacting protein 3  | NM_171996 /// XM_001062691 /// XM_002724662 /// XM_002727755 /// XM_220262 | 1,30  | cytokinesis                                                          |
| <i>Evi2a</i>               | ecotropic viral integration site 2A                                              | NM_001044287                                                               | 1,30  |                                                                      |
| <i>Sirt5</i>               | sirtuin (silent mating type information regulation 2 homolog) 5 (S. cerevisiae)  | NM_001004256                                                               | 1,30  | chromatin silencing                                                  |
| <i>Slit2</i>               | slit homolog 2 (Drosophila)                                                      | NM_022632                                                                  | 1,30  | luteolysis                                                           |
| <i>Bace2</i>               | beta-site APP-cleaving enzyme 2                                                  | NM_001002802                                                               | 1,30  | proteolysis                                                          |
| <i>Asmtl</i>               | acetylserotonin O-methyltransferase-like                                         | NM_001105915                                                               | 1,30  |                                                                      |
| <i>Pmp22</i>               | peripheral myelin protein 22                                                     | NM_017037                                                                  | 1,30  | cell cycle                                                           |
| <i>Hn1</i>                 | hematological and neurological expressed 1                                       | NM_001005876                                                               | 1,30  |                                                                      |
| <i>Plod1</i>               | procollagen-lysine 1, 2-oxoglutarate 5-dioxygenase 1                             | NM_053827                                                                  | 1,30  | response to hypoxia                                                  |
| <i>Pola1</i>               | polymerase (DNA directed), alpha 1                                               | NM_053479 /// XM_001064735 /// XM_242396                                   | 1,30  | S phase of mitotic cell cycle                                        |
| <b>Down-regulated</b>      |                                                                                  |                                                                            |       |                                                                      |
| <i>Mybpc1</i>              | myosin binding protein C, slow type                                              | NM_001100758 /// XM_001076591 /// XM_343196                                | -7,42 | muscle contraction                                                   |

|                 |                                                                           |                                             |              |                                                                       |
|-----------------|---------------------------------------------------------------------------|---------------------------------------------|--------------|-----------------------------------------------------------------------|
| <i>Hspb7</i>    | heat shock protein family, member 7 (cardiovascular)                      | NM_031607                                   | <b>-4,50</b> | response to stress                                                    |
| <i>Fgl2</i>     | fibrinogen-like 2                                                         | NM_053455                                   | <b>-4,04</b> | signal transduction                                                   |
| <i>Bean</i>     | brain expressed, associated with Nedd4                                    | XM_001057606 /// XM_341638                  | <b>-3,59</b> |                                                                       |
| <i>Pycr1</i>    | pyrroline-5-carboxylate reductase 1                                       | NM_001105857                                | <b>-3,10</b> | proline biosynthetic process                                          |
| <i>Enpep</i>    | glutamyl aminopeptidase                                                   | NM_022251                                   | <b>-2,97</b> | proteolysis                                                           |
| <i>RT1-Ba</i>   | RT1 class II antigen, Ba chain                                            | NM_001008831                                | <b>-2,96</b> | antigen processing and presentation of peptide                        |
| <i>Rbp4</i>     | retinol binding protein 4, plasma                                         | NM_013162                                   | <b>-2,74</b> | eye development                                                       |
| <i>Ptprz1</i>   | protein tyrosine phosphatase, receptor-type, Z polypeptide 1              | NM_001170685 /// NM_013080                  | <b>-2,68</b> | protein dephosphorylation                                             |
| <i>Sstr2</i>    | somatostatin receptor 2                                                   | NM_019348                                   | <b>-2,66</b> | regulation of muscle contraction                                      |
| <i>Clcnkb</i>   | chloride channel Kb                                                       | NM_173103                                   | <b>-2,60</b> | transport                                                             |
| <i>Gpc3</i>     | glypican 3                                                                | NM_012774                                   | <b>-2,60</b> | branching involved in ureteric bud morphogenesis                      |
| <i>Dlk1</i>     | delta-like 1 homolog (Drosophila)                                         | NM_053744                                   | <b>-2,57</b> | embryo development                                                    |
| <i>Colec11</i>  | collectin sub-family member 11                                            | XM_002726687 /// XM_002729610               | <b>-2,49</b> |                                                                       |
| <i>Grb10</i>    | growth factor receptor bound protein 10                                   | NM_001109093                                | <b>-2,43</b> | signal transduction                                                   |
| <i>Abcc8</i>    | ATP-binding cassette, sub-family C (CFTR/MRP), member 8                   | NM_013039                                   | <b>-2,40</b> | transport                                                             |
| <i>Es1</i>      | esterase 1 /// microsomal carboxylesterase E1-like                        | NM_017004 /// XM_002725379                  | <b>-2,35</b> | metabolic process                                                     |
| <i>Ntrk2</i>    | neurotrophic tyrosine kinase, receptor, type 2                            | NM_001163168 /// NM_001163169 /// NM_012731 | <b>-2,35</b> | vasculogenesis                                                        |
| <i>Nckap1l</i>  | NCK associated protein 1 like                                             | NM_001108119                                | <b>-2,31</b> | B cell homeostasis                                                    |
| <i>Ccnd2</i>    | cyclin D2                                                                 | NM_022267                                   | <b>-2,28</b> | G1/S transition of mitotic cell cycle                                 |
| <i>Ppm1j</i>    | protein phosphatase 1J                                                    | NM_001005540                                | <b>-2,10</b> | protein dephosphorylation                                             |
| <i>Rem2</i>     | RAS (RAD and GEM) like GTP binding 2                                      | NM_022685                                   | <b>-2,09</b> | regulation of transcription, DNA-dependent                            |
| <i>Slc16a1</i>  | solute carrier family 16, member 1 (monocarboxylic acid transporter 1)    | NM_012716                                   | <b>-2,08</b> | transport                                                             |
| <i>Rab3d</i>    | RAB3D, member RAS oncogene family                                         | NM_080580                                   | <b>-2,05</b> | transport                                                             |
| <i>H2-Ea</i>    | MHC class II RT1D alpha chain antigen                                     | NM_001008847                                | <b>-2,04</b> | antigen processing and presentation of peptide or polysaccharide anti |
| <i>Amigo3</i>   | adhesion molecule with Ig like domain 3                                   | NM_178144                                   | <b>-2,02</b> | cell adhesion                                                         |
| <i>Ndn</i>      | necdin homolog (mouse)                                                    | NM_001008558                                | <b>-2,01</b> | neuron migration                                                      |
| <i>Vldlr</i>    | very low density lipoprotein receptor                                     | NM_013155                                   | <b>-1,98</b> | response to hypoxia                                                   |
| <i>Fshb</i>     | follicle stimulating hormone, beta polypeptide                            | NM_001007597                                | <b>-1,97</b> | transforming growth factor beta receptor signaling pathway            |
| <i>HLA-drb1</i> | MHC class II RT1D beta1 chain antigen                                     | NM_001008884                                | <b>-1,96</b> | antigen processing and presentation of peptide or polysaccharide anti |
| <i>Col24a1</i>  | collagen, type XXIV, alpha 1                                              | XM_002726055 /// XM_575056                  | <b>-1,96</b> | cell adhesion                                                         |
| <i>Rcn3</i>     | reticulocalbin 3, EF-hand calcium binding domain                          | NM_001008694                                | <b>-1,94</b> |                                                                       |
| <i>Oaf</i>      | OAF homolog (Drosophila)                                                  | NM_001014090                                | <b>-1,93</b> |                                                                       |
| <i>Tubb6</i>    | tubulin, beta 6                                                           | NM_001025675                                | <b>-1,93</b> | microtubule-based process                                             |
| <i>Ace</i>      | angiotensin I converting enzyme (peptidyl-dipeptidase A) 1                | NM_012544                                   | <b>-1,91</b> | response to hypoxia                                                   |
| <i>Scnn1g</i>   | sodium channel, nonvoltage-gated 1, gamma                                 | NM_017046                                   | <b>-1,88</b> | response to hypoxia                                                   |
| <i>Spp1</i>     | secreted phosphoprotein 1                                                 | NM_012881                                   | <b>-1,87</b> | ossification                                                          |
| <i>Lhb</i>      | luteinizing hormone beta                                                  | NM_001033975 /// NM_012858                  | <b>-1,87</b> |                                                                       |
| <i>Kcnj11</i>   | potassium inwardly rectifying channel, subfamily J, member 11             | NM_031358                                   | <b>-1,87</b> | glucose metabolic process                                             |
| <i>Cd74</i>     | Cd74 molecule, major histocompatibility complex, class II invariant chain | NM_013069                                   | <b>-1,86</b> | activation of MAPK activity                                           |

|                 |                                                                                  |                               |       |                                                     |
|-----------------|----------------------------------------------------------------------------------|-------------------------------|-------|-----------------------------------------------------|
| <i>Elovl5</i>   | ELOVL family member 5, elongation of long chain fatty acids (yeast)              | NM_134382                     | -1,86 | fatty acid biosynthetic process                     |
| <i>Mapkapk3</i> | mitogen-activated protein kinase-activated protein kinase 3                      | NM_001012127                  | -1,85 | protein phosphorylation                             |
| <i>Sfxn1</i>    | sideroflexin 1                                                                   | NM_001012213                  | -1,84 | transport                                           |
| <i>Bcan</i>     | brevican                                                                         | NM_001033665 /// NM_012916    | -1,83 | cell adhesion                                       |
| <i>Lamc2</i>    | laminin, gamma 2                                                                 | NM_001100640                  | -1,83 | cell adhesion                                       |
| <i>Spata1</i>   | spermatogenesis associated 1                                                     | NM_001014177                  | -1,81 | proteolysis                                         |
| <i>Lepre1</i>   | leucine proline-enriched proteoglycan (leprecan) 1                               | NM_053667                     | -1,80 | cell growth                                         |
| <i>Slc41a2</i>  | Solute carrier family 41, member 2                                               | NM_001108742                  | -1,80 |                                                     |
| <i>Aldh18a1</i> | aldehyde dehydrogenase 18 family, member A1                                      | NM_001108524                  | -1,79 | proline biosynthetic process                        |
| <i>Htatip2</i>  | HIV-1 tat interactive protein 2, homolog (human)                                 | NM_001106263                  | -1,78 | cellular amino acid metabolic process               |
| <i>Fxyd6</i>    | FXYD domain-containing ion transport regulator 6                                 | NM_022005                     | -1,76 | transport                                           |
| <i>Rnd3</i>     | Rho family GTPase 3                                                              | NM_001007641                  | -1,76 | small GTPase mediated signal transduction           |
| <i>Usp13</i>    | Ubiquitin specific protease 13 (isopeptidase T-3)                                | NM_001107665                  | -1,76 | ubiquitin-dependent protein catabolic process       |
| <i>Fam114a1</i> | Family with sequence similarity 114, member A1                                   | XM_001078310 /// XM_573600    | -1,76 |                                                     |
| <i>Ptpn3</i>    | protein tyrosine phosphatase, non-receptor type 3                                | XM_001055793 /// XM_001059757 | -1,75 | protein dephosphorylation                           |
| <i>Adamtsl4</i> | ADAMTS-like 4                                                                    | NM_001034012                  | -1,75 | apoptosis                                           |
| <i>Pcdh21</i>   | protocadherin 21                                                                 | NM_053572                     | -1,75 | cell adhesion                                       |
| <i>Ppap2c</i>   | phosphatidic acid phosphatase type 2c                                            | NM_139252                     | -1,74 |                                                     |
| <i>Mx2</i>      | myxovirus (influenza virus) resistance 2                                         | NM_134350                     | -1,73 | response to virus                                   |
| <i>Rtn4r</i>    | reticulon 4 receptor                                                             | NM_053613                     | -1,72 | axonogenesis                                        |
| <i>Lyz2</i>     | lysozyme 2                                                                       | NM_012771                     | -1,72 | metabolic process                                   |
| <i>Camk1g</i>   | calcium/calmodulin-dependent protein kinase IG                                   | NM_182842                     | -1,72 | protein phosphorylation                             |
| <i>Gmppb</i>    | GDP-mannose pyrophosphorylase B                                                  | NM_001108781                  | -1,71 | biosynthetic process                                |
| <i>Fitm1</i>    | fat storage-inducing transmembrane protein 1                                     | NM_001106037                  | -1,69 | positive regulation of sequestering of triglyceride |
| <i>Epor</i>     | erythropoietin receptor                                                          | NM_017002                     | -1,69 | signal transduction                                 |
| <i>Plat</i>     | plasminogen activator, tissue                                                    | NM_013151                     | -1,67 | response to hypoxia                                 |
| <i>Chpt1</i>    | choline phosphotransferase 1                                                     | NM_001007750                  | -1,66 | phosphatidylcholine biosynthetic process            |
| <i>Dsp</i>      | desmoplakin                                                                      | XM_001058477 /// XM_225259    | -1,66 | cell-cell adhesion                                  |
| <i>Dpp3</i>     | dipeptidylpeptidase 3 /// similar to Dipeptidyl-peptidase 3 (Dipeptidyl-peptidas | NM_053748 /// XM_001053134    | -1,66 | proteolysis                                         |
| <i>Heatr5a</i>  | HEAT repeat containing 5A                                                        | XM_001075318 /// XM_343061    | -1,65 |                                                     |
| <i>Gga2</i>     | golgi associated, gamma adaptin ear containing, ARF binding protein 2            | NM_001100519                  | -1,64 | intracellular protein transport                     |
| <i>Arhgap9</i>  | Rho GTPase activating protein 9                                                  | NM_001012198 /// NM_001080789 | -1,63 | signal transduction                                 |
| <i>Pabpc4</i>   | poly(A) binding protein, cytoplasmic 4                                           | NM_001100538                  | -1,63 |                                                     |
| <i>Srm</i>      | spermidine synthase                                                              | NM_053464                     | -1,61 | spermidine biosynthetic process                     |
| <i>Scly</i>     | selenocysteine lyase                                                             | NM_001007755                  | -1,61 | metabolic process                                   |
| <i>Tesc</i>     | tescalcin                                                                        | XM_001076953 /// XM_213790    | -1,61 | negative regulation of cell proliferation           |
| <i>Sec24d</i>   | SEC24 family, member D (S. cerevisiae)                                           | NM_001107723                  | -1,60 | transport                                           |
| <i>Trim5</i>    | tripartite motif-containing 5                                                    | NM_001014023                  | -1,60 | protein trimerization                               |
| <i>Map2k3</i>   | mitogen activated protein kinase kinase 3                                        | NM_001100674                  | -1,59 | MAPKKK cascade                                      |
| <i>Gsdma</i>    | gasdermin A                                                                      | NM_001108297                  | -1,59 | induction of apoptosis                              |
| <i>Prrc1</i>    | proline-rich coiled-coil 1                                                       | NM_001033887                  | -1,59 |                                                     |
| <i>Pelo</i>     | pelota homolog (Drosophila)                                                      | NM_001007634                  | -1,59 | translation                                         |
| <i>Kcnk10</i>   | potassium channel, subfamily K, member 10                                        | NM_023096                     | -1,59 | transport                                           |
| <i>Nab1</i>     | Ngfi-A binding protein 1                                                         | NM_022856                     | -1,58 | endochondral ossification                           |
| <i>Scn5a</i>    | sodium channel, voltage-gated, type V, alpha subunit                             | NM_001160162 /// NM_013125    | -1,57 | transport                                           |

|                 |                                                                      |                                                                                        |       |                                                            |
|-----------------|----------------------------------------------------------------------|----------------------------------------------------------------------------------------|-------|------------------------------------------------------------|
| <i>Trim54</i>   | tripartite motif-containing 54                                       | NM_001013217                                                                           | -1,56 | negative regulation of microtubule depolymerization        |
| <i>Gltpd1</i>   | glycolipid transfer protein domain containing 1                      | NM_001007703                                                                           | -1,56 | glycolipid transport                                       |
| <i>Fkbp11</i>   | FK506 binding protein 11                                             | NM_001013105                                                                           | -1,56 | protein folding                                            |
| <i>Gas5</i>     | growth arrest specific 5                                             | NR_002704                                                                              | -1,55 |                                                            |
| <i>Ifi44</i>    | interferon-induced protein 44                                        | NM_001107729                                                                           | -1,55 |                                                            |
| <i>Steap2</i>   | six transmembrane epithelial antigen of the prostate 2               | NM_001107846                                                                           | -1,54 | Golgi to plasma membrane transport                         |
| <i>Tmem165</i>  | transmembrane protein 165                                            | NM_001024802                                                                           | -1,54 |                                                            |
| <i>Spire1</i>   | spire homolog 1 (Drosophila)                                         | NM_001107381                                                                           | -1,54 | Golgi vesicle transport                                    |
| <i>Samd4a</i>   | Sterile alpha motif domain containing 4A                             | NM_001107254                                                                           | -1,54 | regulation of translation                                  |
| <i>Sstr3</i>    | somatostatin receptor 3                                              | NM_133522                                                                              | -1,54 | signal transduction                                        |
| <i>Itsn1</i>    | intersectin 1 (SH3 domain protein)                                   | NM_001136096 /// NM_019227                                                             | -1,54 | exocytosis                                                 |
| <i>Rcn1</i>     | reticulocalbin 1, EF-hand calcium binding domain                     | NM_001108586                                                                           | -1,54 |                                                            |
| <i>Rtn4r</i>    | reticulon 4 receptor                                                 | NM_053613                                                                              | -1,53 | axonogenesis                                               |
| <i>Slc38a10</i> | solute carrier family 38, member 10                                  | XM_001081798 /// XM_001081800 ///<br>XM_002724582 /// XM_002727846 ///<br>XM_002727847 | -1,53 |                                                            |
| <i>Mtmr2</i>    | myotubularin related protein 2                                       | NM_001108123                                                                           | -1,53 | dephosphorylation                                          |
| <i>Acs1</i>     | acyl-CoA synthetase long-chain family member 1                       | NM_012820                                                                              | -1,52 | lipid metabolic process                                    |
| <i>Rps6ka1</i>  | ribosomal protein S6 kinase polypeptide 1                            | NM_031107                                                                              | -1,52 | protein phosphorylation                                    |
| <i>Fkbp14</i>   | FK506 binding protein 14                                             | NM_001013210                                                                           | -1,52 | protein folding                                            |
| <i>Golt1b</i>   | golgi transport 1 homolog B (S. cerevisiae)                          | NM_001113783                                                                           | -1,51 | vesicle-mediated transport                                 |
| <i>St8sia3</i>  | ST8 alpha-N-acetyl-neuraminide alpha-2,8-sialyltransferase 3         | NM_013029                                                                              | -1,50 | protein glycosylation                                      |
| <i>Pfkfb4</i>   | 6-phosphofructo-2-kinase/fructose-2,6-biphosphatase 4                | NM_019333                                                                              | -1,50 | fructose metabolic process                                 |
| <i>Ltbp4</i>    | latent transforming growth factor beta binding protein 4             | NM_001170336                                                                           | -1,50 | transforming growth factor beta receptor signaling pathway |
| <i>Tmem150a</i> | transmembrane protein 150A                                           | NM_139107                                                                              | -1,49 | catabolic process                                          |
| <i>Iqsec3</i>   | IQ motif and Sec7 domain 3                                           | NM_207617                                                                              | -1,48 | regulation of ARF protein signal transduction              |
| <i>Ednra</i>    | endothelin receptor type A                                           | NM_012550                                                                              | -1,48 | patterning of blood vessels                                |
| <i>Mlec</i>     | malectin                                                             | NM_001013983                                                                           | -1,47 | carbohydrate metabolic process                             |
| <i>Abcc5</i>    | ATP-binding cassette, sub-family C (CFTR/MRP), member 5              | NM_053924                                                                              | -1,47 | transport                                                  |
| <i>Oasl</i>     | 2'-5'-oligoadenylate synthetase-like                                 | NM_001009681                                                                           | -1,47 | immune response                                            |
| <i>Grb14</i>    | growth factor receptor bound protein 14                              | NM_031623                                                                              | -1,47 | signal transduction                                        |
| <i>Cnih</i>     | cornichon homolog (Drosophila)                                       | NM_001106029                                                                           | -1,46 | intracellular signaling pathway                            |
| <i>Ptprk</i>    | protein tyrosine phosphatase, receptor type, K, extracellular region | NM_001029902                                                                           | -1,46 | protein dephosphorylation                                  |
| <i>Ap2a2</i>    | adaptor-related protein complex 2, alpha 2 subunit                   | NM_031008                                                                              | -1,46 | transport                                                  |
| <i>Hr</i>       | hairless                                                             | NM_024364                                                                              | -1,46 | transcription                                              |
| <i>Otud7a</i>   | OTU domain containing 7A                                             | XM_001058176 /// XM_219703                                                             | -1,46 |                                                            |
| <i>Degs1</i>    | degenerative spermatocyte homolog 1, lipid desaturase (Drosophila)   | NM_053323                                                                              | -1,46 | lipid metabolic process                                    |
| <i>Plcg2</i>    | phospholipase C, gamma 2                                             | NM_017168                                                                              | -1,46 | follicular B cell differentiation                          |
| <i>Gcs1</i>     | glucosidase 1                                                        | NM_031749                                                                              | -1,46 | metabolic process                                          |
| <i>Plxna3</i>   | plexin A3                                                            | NM_001107581                                                                           | -1,46 | signal transduction                                        |
| <i>Nrsn1</i>    | neurensin 1                                                          | NM_001106109                                                                           | -1,45 | nervous system development                                 |
| <i>Ivns1abp</i> | influenza virus NS1A binding protein                                 | NM_001047085                                                                           | -1,44 |                                                            |

|                   |                                                                                  |                                                |       |                                                                      |
|-------------------|----------------------------------------------------------------------------------|------------------------------------------------|-------|----------------------------------------------------------------------|
| <i>Camk2b</i>     | calcium/calmodulin-dependent protein kinase II beta                              | NM_001042354 /// NM_001042356 /// NM_021739    | -1,44 | G1/S transition of mitotic cell cycle                                |
| <i>Slc35e1</i>    | solute carrier family 35, member E1                                              | NM_001109107                                   | -1,44 | transport                                                            |
| <i>Tmem185a</i>   | transmembrane protein 185A                                                       | NM_001135712                                   | -1,44 |                                                                      |
| <i>Homer2</i>     | homer homolog 2 (Drosophila)                                                     | NM_053309                                      | -1,44 |                                                                      |
| <i>Iars</i>       | isoleucyl-tRNA synthetase                                                        | NM_001100572                                   | -1,44 | translation                                                          |
| <i>Igsf1</i>      | immunoglobulin superfamily, member 1                                             | NM_175763                                      | -1,43 | signal transduction                                                  |
| <i>Chka</i>       | choline kinase alpha                                                             | NM_017127                                      | -1,43 | phosphatidylethanolamine biosynthetic process                        |
| <i>Csgalnact2</i> | chondroitin sulfate N-acetylgalactosaminyltransferase 2                          | NM_001106616                                   | -1,43 | proteoglycan biosynthetic process                                    |
| <i>Cad</i>        | carbamoyl-phosphate synthetase 2, aspartate transcarbamylase, and dihydroorotase | NM_001105710                                   | -1,43 | 'de novo' pyrimidine base biosynthetic process                       |
| <i>Col2a1</i>     | collagen, type II, alpha 1                                                       | NM_012929                                      | -1,43 | skeletal system development                                          |
| <i>Doc2b</i>      | double C2-like domains, beta                                                     | NM_031142                                      | -1,43 | transport                                                            |
| <i>Copb2</i>      | coatamer protein complex, subunit beta 2 (beta prime)                            | NM_021765                                      | -1,42 | transport                                                            |
| <i>Rab2b</i>      | RAB2B, member RAS oncogene family                                                | NM_001037645                                   | -1,42 | small GTPase mediated signal transduction                            |
| <i>Tmem39a</i>    | transmembrane protein 39a                                                        | NM_001013865                                   | -1,42 |                                                                      |
| <i>Isg20</i>      | interferon stimulated exonuclease gene 20                                        | NM_001008510                                   | -1,42 | DNA catabolic process, exonucleolytic                                |
| <i>Dnajb5</i>     | DnaJ (Hsp40) homolog, subfamily B, member 5                                      | NM_001108004                                   | -1,42 | negative regulation of transcription from RNA polymerase II promoter |
| <i>Col1a1</i>     | collagen, type I, alpha 1                                                        | NM_053304                                      | -1,42 | skeletal system development                                          |
| <i>Synm</i>       | synemin, intermediate filament protein                                           | NM_001134858                                   | -1,42 |                                                                      |
| <i>Hdlbp</i>      | high density lipoprotein binding protein                                         | NM_172039                                      | -1,42 | lipid metabolic process                                              |
| <i>Ppfibp1</i>    | PTPRF interacting protein, binding protein 1 (liprin beta 1)                     | NM_001107896                                   | -1,42 |                                                                      |
| <i>Pdyn</i>       | prodynorphin                                                                     | NM_019374                                      | -1,41 | neuropeptide signaling pathway                                       |
| <i>Ddx25</i>      | DEAD (Asp-Glu-Ala-Asp) box polypeptide 25                                        | NM_031630                                      | -1,41 | ATP catabolic process                                                |
| <i>Srp72</i>      | signal recognition particle 72                                                   | NM_001170601 /// XM_001066751 /// XM_001074215 | -1,41 | SRP-dependent cotranslational protein targeting to membrane          |
| <i>Sez6l2</i>     | seizure related 6 homolog (mouse)-like 2                                         | NM_001107550                                   | -1,41 |                                                                      |
| <i>Fndc3b</i>     | fibronectin type III domain containing 3B                                        | NM_001191704 /// XM_001057133 /// XM_226988    | -1,41 | positive regulation of fat cell differentiation                      |
| <i>Slc2a4</i>     | solute carrier family 2 (facilitated glucose transporter), member 4              | NM_012751                                      | -1,41 | transport                                                            |
| <i>Slc35e3</i>    | solute carrier family 35, member E3                                              | NM_001134687                                   | -1,41 |                                                                      |
| <i>Uba5</i>       | ubiquitin-like modifier activating enzyme 5                                      | NM_001009669                                   | -1,40 | metabolic process                                                    |
| <i>Golga3</i>     | golgi autoantigen, golgin subfamily a, 3                                         | NM_001107847                                   | -1,40 |                                                                      |
| <i>Marveld1</i>   | MARVEL domain containing 1                                                       | NM_001107590                                   | -1,40 |                                                                      |
| <i>Cobl</i>       | cordon-bleu homolog (mouse)                                                      | NM_001107236                                   | -1,40 | neural tube closure                                                  |
| <i>Txndc11</i>    | thioredoxin domain containing 11                                                 | NM_001127532                                   | -1,40 | cell redox homeostasis                                               |
| <i>Syncrip</i>    | Synaptotagmin binding, cytoplasmic RNA interacting protein                       | NM_001047916                                   | -1,40 | mRNA processing                                                      |
| <i>Fam107a</i>    | family with sequence similarity 107, member A /// downregulated in renal cell ca | NM_001025129 /// XM_002725042 /// XM_002725043 | -1,39 | regulation of cell growth                                            |
| <i>Fam98a</i>     | family with sequence similarity 98, member A                                     | NM_001014073                                   | -1,39 |                                                                      |
| <i>Oxnad1</i>     | oxidoreductase NAD-binding domain containing 1                                   | NM_001107295                                   | -1,39 | oxidation reduction                                                  |
| <i>Mark1</i>      | MAP/microtubule affinity-regulating kinase 1                                     | NM_053947                                      | -1,39 | microtubule cytoskeleton organization                                |
| <i>Ppapdc1b</i>   | phosphatidic acid phosphatase type 2 domain containing 1B                        | NM_001109411                                   | -1,39 |                                                                      |



|                 |                                                                      |                                             |       |                                                                       |
|-----------------|----------------------------------------------------------------------|---------------------------------------------|-------|-----------------------------------------------------------------------|
| <i>Ostc</i>     | oligosaccharyltransferase complex subunit                            | NM_001108566                                | -1,39 |                                                                       |
| <i>Gramd1b</i>  | GRAM domain containing 1B                                            | NM_001191616 /// XM_001059472 /// XM_217113 | -1,39 |                                                                       |
| <i>Icam5</i>    | intercellular adhesion molecule 5, telencephalin                     | NM_001172079 /// XM_001077293 /// XM_233737 | -1,39 | phagocytosis                                                          |
| <i>Lynx1</i>    | Ly6/neurotoxin 1                                                     | NM_001130546                                | -1,38 | pathogenesis                                                          |
| <i>Nlgn3</i>    | Neurexin 3                                                           | NM_134336                                   | -1,38 | regulation of respiratory gaseous exchange by neurological system pro |
| <i>Adamtsl2</i> | ADAMTS-like 2                                                        | XM_001078833 /// XM_231125                  | -1,38 |                                                                       |
| <i>Cnih2</i>    | cornichon homolog 2 (Drosophila)                                     | NM_001025132                                | -1,38 | intracellular signaling pathway                                       |
| <i>Pcp4</i>     | Purkinje cell protein 4                                              | NM_013002                                   | -1,38 |                                                                       |
| <i>Aldh1l2</i>  | aldehyde dehydrogenase 1 family, member L2                           | NM_001191778 /// XM_001079663 /// XM_235005 | -1,38 | one-carbon metabolic process                                          |
| <i>Ubash3b</i>  | ubiquitin associated and SH3 domain containing, B                    | NM_001191792 /// XM_001065047 /// XM_236104 | -1,38 |                                                                       |
| <i>Bzw1</i>     | basic leucine zipper and W2 domains 1                                | NM_198789                                   | -1,38 | transcription                                                         |
| <i>Zcchc12</i>  | zinc finger, CCHC domain containing 12                               | NM_001014065                                | -1,37 | transcription                                                         |
| <i>Zfp853</i>   | zinc finger protein 853                                              | XM_002724787 /// XM_221915                  | -1,37 |                                                                       |
| <i>Cables1</i>  | Cdk5 and Abl enzyme substrate 1                                      | NM_001107404                                | -1,37 | nervous system development                                            |
| <i>Ptk7</i>     | PTK7 protein tyrosine kinase 7                                       | NM_001106889                                | -1,37 | neural tube closure                                                   |
| <i>Ttyh3</i>    | tweety homolog 3 (Drosophila)                                        | NM_001107124                                | -1,37 |                                                                       |
| <i>Man1b1</i>   | mannosidase, alpha, class 1B, member 1                               | XM_001077558 /// XM_575086                  | -1,37 | metabolic process                                                     |
| <i>Glb1l2</i>   | galactosidase, beta 1-like 2                                         | NM_001192018 /// XM_001053731 /// XM_578717 | -1,37 | carbohydrate metabolic process                                        |
| <i>Fam98a</i>   | family with sequence similarity 98, member A                         | NM_001014073                                | -1,37 |                                                                       |
| <i>Dgkz</i>     | diacylglycerol kinase zeta                                           | NM_031143                                   | -1,36 | activation of protein kinase C activity by G-protein coupled receptor |
| <i>Aldh1a2</i>  | aldehyde dehydrogenase 1 family, member A2                           | NM_053896                                   | -1,36 | blood vessel development                                              |
| <i>Ddx39</i>    | DEAD (Asp-Glu-Ala-Asp) box polypeptide 39                            | NM_053563                                   | -1,35 | nuclear mRNA splicing, via spliceosome                                |
| <i>Alox15</i>   | arachidonate 15-lipoxygenase                                         | NM_031010                                   | -1,35 | ossification                                                          |
| <i>Ppargc1b</i> | peroxisome proliferator-activated receptor gamma, coactivator 1 beta | NM_176075                                   | -1,35 | transcription                                                         |
| <i>Znf536</i>   | zinc finger protein 536                                              | XM_001077206 /// XM_218522                  | -1,35 |                                                                       |
| <i>Atg9a</i>    | ATG9 autophagy related 9 homolog A (S. cerevisiae)                   | NM_001014218                                | -1,35 | autophagic vacuole assembly                                           |
| <i>Epas1</i>    | endothelial PAS domain protein 1                                     | NM_023090                                   | -1,35 | angiogenesis                                                          |
| <i>Eprs</i>     | glutamyl-prolyl-tRNA synthetase                                      | NM_001024238                                | -1,35 | translation                                                           |
| <i>Ap3m1</i>    | adaptor-related protein complex 3, mu 1 subunit                      | NM_133593                                   | -1,35 | transport                                                             |
| <i>Zyx</i>      | zyxin                                                                | NM_053761                                   | -1,35 | regulation of inflammatory response                                   |
| <i>Ggct</i>     | gamma-glutamyl cyclotransferase                                      | NM_001108629                                | -1,35 |                                                                       |
| <i>Fhdc1</i>    | FH2 domain containing 1                                              | NM_001106437                                | -1,35 | cellular component organization                                       |
| <i>MyI9</i>     | myosin, light chain 9, regulatory                                    | NM_001100885                                | -1,35 | muscle contraction                                                    |
| <i>Rab27a</i>   | RAB27A, member RAS oncogene family                                   | NM_017317                                   | -1,34 | protein targeting                                                     |
| <i>Hyou1</i>    | hypoxia up-regulated 1                                               | NM_001034028 /// NM_138867                  | -1,34 | response to hypoxia                                                   |
| <i>Atf5</i>     | activating transcription factor 5                                    | NM_172336                                   | -1,34 | transcription                                                         |
| <i>Hcfc2</i>    | host cell factor C2                                                  | NM_001008357                                | -1,34 |                                                                       |
| <i>Tram1</i>    | translocation associated membrane protein 1                          | NM_001007701                                | -1,34 | transport                                                             |
| <i>Ln timer</i> | ligand of numb-protein X 2                                           | NM_001108329                                | -1,34 | protein homooligomerization                                           |
| <i>Nos1ap</i>   | nitric oxide synthase 1 (neuronal) adaptor protein                   | NM_138922                                   | -1,34 | neurotransmitter secretion                                            |
| <i>Umps</i>     | uridine monophosphate synthetase                                     | NM_001025402                                | -1,34 | 'de novo' pyrimidine base biosynthetic process                        |

|                                 |                                                                                  |                                                                               |       |                                                                       |
|---------------------------------|----------------------------------------------------------------------------------|-------------------------------------------------------------------------------|-------|-----------------------------------------------------------------------|
| <i>Dgka</i>                     | diacylglycerol kinase, alpha                                                     | NM_080787                                                                     | -1,34 | activation of protein kinase C activity by G-protein coupled receptor |
| <i>Ehd4</i>                     | EH-domain containing 4                                                           | NM_139324                                                                     | -1,34 | pinocytosis                                                           |
| <i>Trabd</i>                    | TraB domain containing                                                           | NM_001106788                                                                  | -1,33 |                                                                       |
| <i>Prdx4</i>                    | peroxiredoxin 4                                                                  | NM_053512                                                                     | -1,33 | cell redox homeostasis                                                |
| <i>Fig4</i>                     | FIG4 homolog (S. cerevisiae)                                                     | NM_001047096                                                                  | -1,33 | vacuole organization                                                  |
| <i>Ipo4</i>                     | importin 4                                                                       | NM_001106038                                                                  | -1,33 | intracellular protein transport                                       |
| <i>Ddx19a</i> /// <i>Ddx19b</i> | DEAD (Asp-Glu-Ala-Asp) box polypeptide 19a /// DEAD (Asp-Glu-Ala-As) box polypep | NM_001005381 /// NM_001005895 /// XM_001075251 /// XM_002725392               | -1,32 | induction of apoptosis                                                |
| <i>Psmc5</i>                    | proteasome (prosome, macropain) 26S subunit, non-ATPase, 5                       | NM_001106569                                                                  | -1,32 | anaphase-promoting complex-dependent proteasomal ubiquitin-dependent  |
| <i>Mxra8</i>                    | matrix-remodelling associated 8                                                  | NM_001007002                                                                  | -1,32 |                                                                       |
| <i>Necab3</i>                   | N-terminal EF-hand calcium binding protein 3                                     | NM_001098724                                                                  | -1,32 | antibiotic biosynthetic process                                       |
| <i>Ccdc28b</i>                  | coiled coil domain containing 28B                                                | NM_001134689                                                                  | -1,32 |                                                                       |
| <i>Mier2</i>                    | mesoderm induction early response 1, family member 2                             | NM_001108737                                                                  | -1,32 |                                                                       |
| <i>Slc20a2</i>                  | solute carrier family 20 (phosphate transporter), member 2                       | NM_017223                                                                     | -1,32 | transport                                                             |
| <i>Tmem57</i>                   | transmembrane protein 57                                                         | NM_001025699                                                                  | -1,31 |                                                                       |
| <i>Pdp2</i>                     | pyruvate dehydrogenase phosphatase catalytic subunit 2                           | NM_145091                                                                     | -1,31 | protein dephosphorylation                                             |
| <i>Fam101b</i>                  | family with sequence similarity 101, member B                                    | NM_001007611                                                                  | -1,31 |                                                                       |
| <i>Galnt1</i>                   | UDP-N-acetyl-alpha-D-galactosamine:polypeptide N-acetylglactosaminyltransferase  | NM_024373                                                                     | -1,31 | protein O-linked glycosylation                                        |
| <i>Ctdspl</i>                   | CTD (carboxy-terminal domain, RNA polymerase II, polypeptide A) small phosphatas | NM_001106865                                                                  | -1,31 |                                                                       |
| <i>Cdc42bpa</i>                 | CDC42 binding protein kinase alpha                                               | NM_053657                                                                     | -1,31 | microtubule cytoskeleton organization                                 |
| <i>Arfgap1</i>                  | ADP-ribosylation factor GTPase activating protein 1                              | NM_145090                                                                     | -1,31 | transport                                                             |
| <i>Tmem164</i>                  | transmembrane protein 164                                                        | NM_001109014                                                                  | -1,31 |                                                                       |
| <i>Dopey2</i>                   | dopey family member 2                                                            | NM_001191660 /// XM_001055500 /// XM_002724703 /// XM_002727866 /// XM_221640 | -1,30 |                                                                       |
| <i>Batf3</i>                    | basic leucine zipper transcription factor, ATF-like 3                            | NM_021865                                                                     | -1,30 | transcription                                                         |
| <i>Dad1</i>                     | defender against cell death 1                                                    | NM_138910                                                                     | -1,30 | blastocyst development                                                |
| <i>Diaph1</i>                   | Diaphanous homolog 1 (Drosophila)                                                | NM_001107393                                                                  | -1,30 | cellular component organization                                       |
| <i>Fam20c</i>                   | family with sequence similarity 20, member C                                     | NM_001012238                                                                  | -1,30 |                                                                       |

\* P value = 0.029, was obtained by permutation analysis. Fold change  $\geq 1.3$ .
