# Supplementary material
Source: publisher figshare collection journal article supplement (https://karger.figshare.com/articles/dataset/_/5123515)
Supplement: Supplementary file 4 [file 1]

**Supplemental table 9: List of genes regulated by LTMCR in the hypothalamus**

| Gene Symbol                     | Gene Title                                                         | RefSeq Transcript ID                                                             | Fold change | Gene Ontology Biological Process                                     |
|---------------------------------|--------------------------------------------------------------------|----------------------------------------------------------------------------------|-------------|----------------------------------------------------------------------|
| <b>Up-regulated</b>             |                                                                    |                                                                                  |             |                                                                      |
| <i>RT1-N1</i> /// <i>RT1-N2</i> | RT1 class Ib, locus N1 /// RT1 class Ib, locus N2                  | NM_001008854 /// NM_012646                                                       | <b>2,18</b> | immune response                                                      |
| <i>Nr4a3</i>                    | nuclear receptor subfamily 4, group A, member 3                    | NM_017352 /// NM_031628                                                          | <b>1,69</b> | mesoderm formation                                                   |
| <i>Hspa1a</i> /// <i>Hspa1b</i> | heat shock 70kD protein 1A /// heat shock 70kD protein 1B (mapped) | NM_031971 /// NM_212504                                                          | <b>1,56</b> | telomere maintenance                                                 |
| <i>Hspa1a</i>                   | heat shock 70kD protein 1A                                         | NM_031971                                                                        | <b>1,56</b> | telomere maintenance                                                 |
| <i>Fkbp5</i>                    | FK506 binding protein 5                                            | NM_001012174                                                                     | <b>1,49</b> | protein folding                                                      |
| <i>Gas2</i>                     | growth arrest-specific 2                                           | NM_001127504                                                                     | <b>1,49</b> | cell cycle arrest                                                    |
| <i>Tpr</i>                      | translocated promoter region                                       | NM_001107185                                                                     | <b>1,48</b> | translation                                                          |
| <i>DnaJ3</i>                    | DnaJ (Hsp40) homolog, subfamily A, member 3                        | NM_001038595 /// NM_001038596                                                    | <b>1,48</b> | mitochondrial DNA replication                                        |
| <i>Osgp</i>                     | O-sialoglycoprotein endopeptidase                                  | NM_001100510                                                                     | <b>1,47</b> | proteolysis                                                          |
| <i>Zbtb20</i>                   | zinc finger and BTB domain containing 20                           | NM_001105880                                                                     | <b>1,47</b> |                                                                      |
| <i>RT1-T24-3</i>                | RT1 class I, locus T24, gene 3                                     | NM_001166403                                                                     | <b>1,43</b> | immune response                                                      |
| <i>Per2</i>                     | period homolog 2 (Drosophila)                                      | NM_031678                                                                        | <b>1,43</b> | transcription                                                        |
| <i>Rbm3</i>                     | RNA binding motif (RNP1, RRM) protein 3                            | NM_053696                                                                        | <b>1,41</b> | translation                                                          |
| <i>Afmid</i>                    | arylformamidase                                                    | NM_001111366                                                                     | <b>1,40</b> | metabolic process                                                    |
| <i>Cry1</i>                     | cryptochrome 1 (photolyase-like)                                   | NM_198750                                                                        | <b>1,40</b> | DNA repair                                                           |
| <i>Gpatch4</i>                  | G patch domain containing 4                                        | NM_001024979                                                                     | <b>1,38</b> |                                                                      |
| <i>Ppp1r15b</i>                 | protein phosphatase 1, regulatory (inhibitor) subunit 15b          | NM_001107175                                                                     | <b>1,36</b> | response to stress                                                   |
| <i>Egr2</i>                     | early growth response 2                                            | NM_053633                                                                        | <b>1,35</b> | transcription                                                        |
| <i>Pdlim5</i>                   | PDZ and LIM domain 5                                               | NM_053326                                                                        | <b>1,35</b> | heart development                                                    |
| <i>Casp8</i>                    | caspase 8                                                          | NM_022277                                                                        | <b>1,35</b> | angiogenesis                                                         |
| <i>Tmem144</i>                  | transmembrane protein 144                                          | NM_001108551                                                                     | <b>1,34</b> |                                                                      |
| <i>Tle1</i>                     | transducin-like enhancer of split 1 (E(sp1) homolog, Drosophila)   | NM_001173433 /// XM_001066887 /// XM_002726541 /// XM_002726542 /// XM_002726543 | <b>1,34</b> | negative regulation of transcription from RNA polymerase II promoter |
| <i>Myst3</i>                    | MYST histone acetyltransferase (monocytic leukemia) 3              | NM_001100570                                                                     | <b>1,34</b> | nucleosome assembly                                                  |
| <i>Otud7b</i>                   | OTU domain containing 7B                                           | NM_001107697                                                                     | <b>1,34</b> | protein deubiquitination                                             |
| <i>Calcl</i>                    | calcitonin receptor-like                                           | NM_012717                                                                        | <b>1,34</b> | regulation of muscle contraction                                     |
| <i>Nhlrc3</i>                   | NHL repeat containing 3                                            | XM_001054658 /// XM_227139                                                       | <b>1,33</b> |                                                                      |
| <i>Gna14</i>                    | guanine nucleotide binding protein, alpha 14                       | NM_001013151                                                                     | <b>1,33</b> | protein ADP-ribosylation                                             |
| <i>Cd1d1</i>                    | CD1d1 molecule                                                     | NM_017079                                                                        | <b>1,32</b> | positive regulation of T cell mediated cytotoxicity                  |
| <i>Syt6</i>                     | synaptotagmin VI                                                   | NM_022191                                                                        | <b>1,32</b> | transport                                                            |
| <i>Pla2g3</i>                   | phospholipase A2, group III                                        | NM_001106015                                                                     | <b>1,32</b> | phospholipid metabolic process                                       |
| <i>Camk1g</i>                   | calcium/calmodulin-dependent protein kinase IG                     | NM_182842                                                                        | <b>1,31</b> | protein phosphorylation                                              |
| <i>Wfdc6a</i>                   | WAP four-disulfide core domain 6A                                  | XM_001062561 /// XM_002726295                                                    | <b>1,31</b> |                                                                      |
| <i>Tctn3</i>                    | tectonic family member 3                                           | XM_001053561 /// XM_220007                                                       | <b>1,31</b> |                                                                      |
| <i>Yy1</i>                      | YY1 transcription factor                                           | NM_173290                                                                        | <b>1,31</b> | regulation of transcription, DNA-dependent                           |
| <i>Prpf38b</i>                  | PRP38 pre-mRNA processing factor 38 (yeast) domain containing B    | NM_001024305                                                                     | <b>1,30</b> | mRNA processing                                                      |

## Down-regulated

|               |                                                          |                                                                                        |              |                                            |
|---------------|----------------------------------------------------------|----------------------------------------------------------------------------------------|--------------|--------------------------------------------|
| <i>Irf2</i>   | interferon regulatory factor 2                           | NM_001047086                                                                           | <b>-1,30</b> | regulation of transcription, DNA-dependent |
| <i>Apoa1</i>  | apolipoprotein A-I                                       | NM_012738                                                                              | <b>-1,31</b> | regulation of protein phosphorylation      |
| <i>Cartpt</i> | CART prepropeptide                                       | NM_017110                                                                              | <b>-1,33</b> | activation of MAPKK activity               |
| <i>Tgm2</i>   | transglutaminase 2, C polypeptide                        | NM_019386                                                                              | <b>-1,33</b> | blood vessel remodeling                    |
| <i>Lmf1</i>   | lipase maturation factor 1                               | XM_001060521 /// XM_340769                                                             | <b>-1,35</b> | protein secretion                          |
| <i>Vcan</i>   | versican                                                 | NM_001170558 /// NM_001170559 ///<br>NM_001170560 /// NM_053663 ///<br>XM_001058357 // | <b>-1,36</b> | ureteric bud development                   |
| <i>Nr1d1</i>  | nuclear receptor subfamily 1, group D, member 1          | NM_001113422 /// NM_145775                                                             | <b>-1,38</b> | transcription                              |
| <i>Opalin</i> | oligodendrocytic myelin paranodal and inner loop protein | NM_001017386                                                                           | <b>-1,41</b> |                                            |
| <i>Htra3</i>  | HtrA serine peptidase 3                                  | XM_001058037 /// XM_341237                                                             | <b>-1,44</b> | regulation of cell growth                  |
| <i>Nov</i>    | nephroblastoma overexpressed gene                        | NM_030868                                                                              | <b>-1,51</b> | regulation of cell growth                  |
| <i>Matn2</i>  | matrilin 2                                               | XM_001058523 /// XM_216941                                                             | <b>-1,62</b> |                                            |
| <i>Vof16</i>  | ischemia related factor vof-16                           | NM_147207                                                                              | <b>-2,25</b> |                                            |

\* *P* value = 0.029, was obtained by permutation analysis. Fold change  $\geq 1.3$ .
