# Supplementary material
Source: publisher figshare collection journal article supplement (https://karger.figshare.com/articles/dataset/_/5123515)
Supplement: Supplementary file 5 [file 1]

**Supplemental table 6: List of genes regulated by LTMCR in the anterior pituitary**

| Gene Symbol                     | Gene Title                                                         | RefSeq Transcript ID                           | Fold change | Gene Ontology Biological Process                                     |
|---------------------------------|--------------------------------------------------------------------|------------------------------------------------|-------------|----------------------------------------------------------------------|
| <b>Up-regulated</b>             |                                                                    |                                                |             |                                                                      |
| <i>Snca</i>                     | synuclein, gamma (breast cancer-specific protein 1)                | NM_031688                                      | <b>3,11</b> | peripheral nervous system development                                |
| <i>Pcdh10</i>                   | protocadherin 10                                                   | XM_001054521 /// XM_342242                     | <b>2,45</b> | cell adhesion                                                        |
| <i>Per2</i>                     | period homolog 2 (Drosophila)                                      | NM_031678                                      | <b>2,07</b> | transcription                                                        |
| <i>Hspa1a</i> /// <i>Hspa1b</i> | heat shock 70kD protein 1A /// heat shock 70kD protein 1B (mapped) | NM_031971 /// NM_212504                        | <b>1,79</b> | telomere maintenance                                                 |
| <i>Dnajb1</i>                   | DnaJ (Hsp40) homolog, subfamily B, member 1                        | NM_001108441                                   | <b>1,67</b> | protein folding                                                      |
| <i>Chordc1</i>                  | cysteine and histidine-rich domain (CHORD)-containing 1            | NM_001108128                                   | <b>1,67</b> |                                                                      |
| <i>Usp2</i>                     | ubiquitin specific peptidase 2                                     | NM_053774                                      | <b>1,64</b> | negative regulation of transcription from RNA polymerase II promoter |
| <i>Adamtsl4</i>                 | ADAMTS-like 4                                                      | NM_001034012                                   | <b>1,61</b> | apoptosis                                                            |
| <i>Lrrn3</i>                    | leucine rich repeat neuronal 3                                     | NM_030856                                      | <b>1,58</b> | positive regulation of protein phosphorylation                       |
| <i>Plk5</i>                     | polo-like kinase 5                                                 | NM_001170557 /// XM_001076512<br>/// XM_234920 | <b>1,47</b> | protein phosphorylation                                              |
| <i>Dnase1</i>                   | deoxyribonuclease I                                                | NM_013097                                      | <b>1,45</b> | DNA catabolic process                                                |
| <i>Nr1d2</i>                    | nuclear receptor subfamily 1, group D, member 2                    | NM_147210                                      | <b>1,44</b> | transcription                                                        |
| <i>Hgf</i>                      | hepatocyte growth factor activator                                 | NM_053320                                      | <b>1,43</b> | proteolysis                                                          |
| <i>Fkbp14</i>                   | FK506 binding protein 14                                           | NM_001013210                                   | <b>1,42</b> | protein folding                                                      |
| <i>Tef</i>                      | thyrotrophic embryonic factor                                      | NM_019194                                      | <b>1,41</b> | transcription                                                        |
| <i>Rbm3</i>                     | RNA binding motif (RNP1, RRM) protein 3                            | NM_053696                                      | <b>1,39</b> | translation                                                          |
| <i>Jam2</i>                     | junctional adhesion molecule 2                                     | NM_001034004                                   | <b>1,38</b> |                                                                      |
| <i>Bhlhe41</i>                  | basic helix-loop-helix family, member e41                          | XM_001074956 /// XM_002729454                  | <b>1,37</b> | transcription                                                        |
| <i>Dnaja1</i>                   | DnaJ (Hsp40) homolog, subfamily A, member 1                        | NM_022934                                      | <b>1,35</b> | protein folding                                                      |
| <i>Hla-e</i>                    | Major histocompatibility complex class I E                         | NM_001008886                                   | <b>1,35</b> | positive regulation of T cell mediated cytotoxicity                  |
| <i>Myh6</i>                     | myosin, heavy chain 6, cardiac muscle, alpha                       | NM_017239                                      | <b>1,35</b> | response to reactive oxygen species                                  |
| <i>Syncrin</i>                  | Synaptotagmin binding, cytoplasmic RNA interacting protein         | NM_001047916                                   | <b>1,34</b> | mRNA processing                                                      |
| <i>Klf6</i>                     | Kruppel-like factor 6                                              | NM_031642                                      | <b>1,34</b> | transcription                                                        |
| <i>Cacybp</i>                   | calcyclin binding protein                                          | NM_001004208                                   | <b>1,34</b> | heart development                                                    |
| <i>Avil</i>                     | advillin                                                           | NM_024401                                      | <b>1,34</b> | cytoskeleton organization                                            |

|                |                                     |              |             |                         |
|----------------|-------------------------------------|--------------|-------------|-------------------------|
| <i>Wee1</i>    | wee 1 homolog (S. pombe)            | NM_001012742 | <b>1,34</b> | protein phosphorylation |
| <i>Birc3</i>   | baculoviral IAP repeat-containing 3 | NM_023987    | <b>1,33</b> | anti-apoptosis          |
| <i>Mettl7a</i> | methyltransferase like 7A           | NM_001037355 | <b>1,32</b> | metabolic process       |
| <i>Tpsb2</i>   | trypsin beta 2                      | NM_019180    | <b>1,31</b> | proteolysis             |
| <i>H13</i>     | histocompatibility 13               | NM_001107789 | <b>1,31</b> |                         |
| <i>Cry2</i>    | cryptochrome 2 (photolyase-like)    | NM_133405    | <b>1,30</b> | DNA repair              |
| <i>Jph3</i>    | junctophilin 3                      | NM_001107437 | <b>1,30</b> | locomotion              |

## Down-regulated

|                                         |                                                                                     |                                             |              |                                                              |
|-----------------------------------------|-------------------------------------------------------------------------------------|---------------------------------------------|--------------|--------------------------------------------------------------|
| <i>Igfbp3</i>                           | insulin-like growth factor binding protein 3                                        | NM_012588                                   | <b>-2,33</b> | regulation of cell growth                                    |
| <i>Nupr1</i>                            | nuclear protein, transcriptional regulator, 1                                       | NM_053611                                   | <b>-1,93</b> | acute inflammatory response                                  |
| <i>Fam171a1</i> ///<br><i>LOC684862</i> | family with sequence similarity 171, member A1<br>/// hypothetical protein LOC68486 | XM_001056358 /// XM_001072231               | <b>-1,93</b> |                                                              |
| <i>Lix1</i>                             | Lix1 homolog (chicken)                                                              | NM_001106214                                | <b>-1,92</b> |                                                              |
| <i>Serping1</i>                         | serine (or cysteine) peptidase inhibitor, clade G, member 1                         | NM_199093                                   | <b>-1,76</b> | negative regulation of complement activation, lectin pathway |
| <i>F2r</i>                              | coagulation factor II (thrombin) receptor                                           | NM_012950                                   | <b>-1,76</b> | activation of MAPKK activity                                 |
| <i>Ptp4a3</i>                           | protein tyrosine phosphatase 4a3                                                    | NM_001114405                                | <b>-1,74</b> | protein dephosphorylation                                    |
| <i>Cmb1</i>                             | carboxymethylenebutenolidase homolog (Pseudomonas)                                  | NM_001008770                                | <b>-1,74</b> |                                                              |
| <i>Syn2</i>                             | synapsin II                                                                         | NM_001034020 /// NM_019159                  | <b>-1,73</b> | neurotransmitter secretion                                   |
| <i>Xdh</i>                              | xanthine dehydrogenase                                                              | NM_017154                                   | <b>-1,70</b> | lactation                                                    |
| <i>Chrn4</i>                            | cholinergic receptor, nicotinic, beta 4                                             | NM_052806                                   | <b>-1,68</b> | regulation of action potential                               |
| <i>Aqp4</i>                             | aquaporin 4                                                                         | NM_001142366 /// NM_012825                  | <b>-1,65</b> | transport                                                    |
| <i>Arsb</i>                             | arylsulfatase B                                                                     | NM_033443                                   | <b>-1,64</b> | autophagy                                                    |
| <i>B4galT4</i>                          | UDP-Gal:betaGlcNAc beta 1,4-galactosyltransferase, polypeptide 4                    | NM_001012018                                | <b>-1,64</b> | carbohydrate metabolic process                               |
| <i>Pigt</i>                             | phosphatidylinositol glycan anchor biosynthesis, class T                            | NM_001106540                                | <b>-1,61</b> | attachment of GPI anchor to protein                          |
| <i>Tmem98</i>                           | transmembrane protein 98                                                            | NM_001007672                                | <b>-1,57</b> |                                                              |
| <i>Aqp1</i>                             | aquaporin 1                                                                         | NM_012778                                   | <b>-1,55</b> | glomerular filtration                                        |
| <i>Arntl</i>                            | aryl hydrocarbon receptor nuclear translocator-like                                 | NM_024362                                   | <b>-1,51</b> | protein import into nucleus, translocation                   |
| <i>Retsat</i>                           | retinol saturase (all trans retinol 13,14 reductase)                                | NM_145084                                   | <b>-1,50</b> | retinol metabolic process                                    |
| <i>Cbr1</i> ///<br><i>LOC100360507</i>  | carbonyl reductase 1 /// inducible carbonyl reductase-like                          | NM_019170 /// XM_002727460 /// XM_002727863 | <b>-1,50</b> | ovulation from ovarian follicle                              |
| <i>Slc43a2</i>                          | solute carrier family 43, member 2                                                  | NM_001105812                                | <b>-1,47</b> | amino acid transmembrane transport                           |
| <i>Carhsp1</i>                          | calcium regulated heat stable protein 1                                             | NM_152790                                   | <b>-1,47</b> | regulation of transcription, DNA-dependent                   |
| <i>H2afj</i>                            | H2A histone family, member J                                                        | NM_001109610                                | <b>-1,46</b> | nucleosome assembly                                          |
| <i>Glrx1</i>                            | glutaredoxin 1                                                                      | NM_022278                                   | <b>-1,45</b> | transport                                                    |

|                   |                                                                                |                                                                               |       |                                                                  |
|-------------------|--------------------------------------------------------------------------------|-------------------------------------------------------------------------------|-------|------------------------------------------------------------------|
| <i>Pvrl2</i>      | poliovirus receptor-related 2                                                  | NM_001012064                                                                  | -1,44 | positive regulation of natural killer cell mediated cytotoxicity |
| <i>Tspan8</i>     | tetraspanin 8                                                                  | NM_133526                                                                     | -1,44 | negative regulation of blood coagulation                         |
| <i>Slco3a1</i>    | Solute carrier organic anion transporter family, member 3a1                    | NM_177481                                                                     | -1,44 | transport                                                        |
| <i>Emcn</i>       | endomucin                                                                      | NM_001004228                                                                  | -1,43 | angiogenesis                                                     |
| <i>Flnb</i>       | filamin, beta                                                                  | NM_001107288                                                                  | -1,43 | skeletal muscle tissue development                               |
| <i>Eid2b</i>      | EP300 interacting inhibitor of differentiation 2B                              | XM_002725600 /// XM_574407                                                    | -1,40 |                                                                  |
| <i>Trappc6a</i>   | trafficking protein particle complex 6A                                        | NM_001109410                                                                  | -1,40 | cGMP biosynthetic process                                        |
| <i>Myh14</i>      | myosin, heavy chain 14                                                         | NM_001100690                                                                  | -1,39 | ATP catabolic process                                            |
| <i>Nup93</i>      | nucleoporin 93                                                                 | NM_001011925                                                                  | -1,39 | transport                                                        |
| <i>Sts</i>        | steroid sulfatase                                                              | NM_012661                                                                     | -1,38 | lipid metabolic process                                          |
| <i>Kazald1</i>    | Kazal-type serine peptidase inhibitor domain 1                                 | NM_001033064                                                                  | -1,38 | regulation of cell growth                                        |
| <i>Tfpi</i>       | tissue factor pathway inhibitor (lipoprotein-associated coagulation inhibitor) | NM_001177321 /// NM_017200                                                    | -1,38 | blood coagulation                                                |
| <i>Slc20a2</i>    | solute carrier family 20 (phosphate transporter), member 2                     | NM_017223                                                                     | -1,38 | transport                                                        |
| <i>Klc1</i>       | kinesin light chain 1                                                          | NM_001081972 /// NM_001081973 /// NM_001081974                                | -1,37 | axon cargo transport                                             |
| <i>Glx5</i>       | glutaredoxin 5                                                                 | NM_001108722                                                                  | -1,37 | cell redox homeostasis                                           |
| <i>Ehd3</i>       | EH-domain containing 3                                                         | NM_138890                                                                     | -1,37 |                                                                  |
| <i>Nfs1</i>       | NFS1 nitrogen fixation 1 homolog (S. cerevisiae)                               | NM_053462                                                                     | -1,35 | cysteine metabolic process                                       |
| <i>Cenpb</i>      | centromere protein B                                                           | XM_001081194 /// XM_342521                                                    | -1,35 | regulation of transcription                                      |
| <i>Bend5</i>      | BEN domain containing 5                                                        | NM_001108672                                                                  | -1,35 |                                                                  |
| <i>Chchd6</i>     | coiled-coil-helix-coiled-coil-helix domain containing 6                        | NM_001106608                                                                  | -1,35 |                                                                  |
| <i>Thumpd3</i>    | THUMP domain containing 3                                                      | NM_001170546 /// NM_001170547 /// NM_001170548 /// XM_001078607 /// XM_575638 | -1,35 |                                                                  |
| <i>Rrm1</i>       | ribonucleotide reductase M1                                                    | NM_001013236                                                                  | -1,35 | DNA replication                                                  |
| <i>Csgalnact1</i> | chondroitin sulfate N-acetylgalactosaminyltransferase 1                        | NM_001107309                                                                  | -1,34 | UDP-N-acetylgalactosamine metabolic process                      |
| <i>Slc41a3</i>    | solute carrier family 41, member 3                                             | NM_001037492                                                                  | -1,34 | cation transport                                                 |
| <i>Gaa</i>        | glucosidase, alpha, acid                                                       | NM_199118                                                                     | -1,33 | angiogenesis                                                     |
| <i>Pigy</i>       | phosphatidylinositol glycan anchor biosynthesis, class Y                       | NM_001024370                                                                  | -1,33 | GPI anchor biosynthetic process                                  |
| <i>Pfkfb</i>      | phosphofructokinase, platelet                                                  | NM_206847                                                                     | -1,33 | fructose 6-phosphate metabolic process                           |
| <i>Cip98</i>      | CASK-interacting protein CIP98                                                 | NM_181088                                                                     | -1,33 | retina homeostasis                                               |

|                 |                                                                               |                               |       |                                       |
|-----------------|-------------------------------------------------------------------------------|-------------------------------|-------|---------------------------------------|
| <i>Galm</i>     | galactose mutarotase (aldose 1-epimerase)                                     | NM_001007704                  | -1,33 | carbohydrate metabolic process        |
| <i>Tfrc</i>     | transferrin receptor                                                          | NM_022712                     | -1,33 | response to hypoxia                   |
| <i>Bat3</i>     | HLA-B-associated transcript 3                                                 | NM_001033968 /// NM_053609    | -1,33 | regulation of cell proliferation      |
| <i>Pdhx</i>     | Pyruvate dehydrogenase complex, component X                                   | NM_001044242                  | -1,33 | metabolic process                     |
| <i>Polr2l</i>   | polymerase (RNA) II (DNA directed) polypeptide L                              | NM_001143911                  | -1,33 | transcription, DNA-dependent          |
| <i>Prr13</i>    | proline rich 13                                                               | NM_001008379                  | -1,33 | transcription                         |
| <i>Aloxe3</i>   | arachidonate lipoxygenase 3                                                   | NM_001105793                  | -1,33 | leukotriene metabolic process         |
| <i>Mrpl21</i>   | mitochondrial ribosomal protein L21                                           | NM_001107567                  | -1,32 | translation                           |
| <i>G3bp1</i>    | GTPase activating protein (SH3 domain) binding protein 1                      | NM_133565                     | -1,32 | transport                             |
| <i>Adck5</i>    | aarF domain containing kinase 5                                               | NM_001135798                  | -1,32 |                                       |
| <i>Mrps18a</i>  | mitochondrial ribosomal protein S18A                                          | NM_198756                     | -1,32 | translation                           |
| <i>Thy1</i>     | Thy-1 cell surface antigen                                                    | NM_012673                     | -1,32 | angiogenesis                          |
| <i>Lgals3bp</i> | lectin, galactoside-binding, soluble, 3 binding protein                       | NM_139096                     | -1,32 | cell adhesion                         |
| <i>Bat5</i>     | HLA-B associated transcript 5                                                 | NM_212531                     | -1,32 |                                       |
| <i>Aig1</i>     | androgen-induced 1                                                            | NM_001134425                  | -1,32 |                                       |
| <i>Elmo2</i>    | engulfment and cell motility 2                                                | NM_001134955                  | -1,32 | phagocytosis                          |
| <i>Cd151</i>    | CD151 molecule (Raph blood group)                                             | NM_022523                     | -1,32 | hemidesmosome assembly                |
| <i>Ppp1r10</i>  | protein phosphatase 1, regulatory subunit 10                                  | NM_022951                     | -1,31 | transcription                         |
| <i>Camk2d</i>   | calcium/calmodulin-dependent protein kinase II delta                          | NM_012519                     | -1,31 | G1/S transition of mitotic cell cycle |
| <i>Mcts2</i>    | malignant T cell amplified sequence 2                                         | XM_001071410 /// XM_002726252 | -1,31 |                                       |
| <i>Bola3</i>    | bolA homolog 3 (E. coli)                                                      | NM_001106601                  | -1,31 |                                       |
| <i>Atp5s</i>    | ATP synthase, H+ transporting, mitochondrial F0 complex, subunit s (factor B) | NM_001007749                  | -1,31 | ATP biosynthetic process              |
| <i>Mgea5</i>    | meningioma expressed antigen 5 (hyaluronidase)                                | NM_131904                     | -1,31 | N-acetylglucosamine metabolic process |
| <i>Shbg</i>     | sex hormone binding globulin                                                  | NM_012650                     | -1,31 | primary spermatocyte growth           |
| <i>Gmpr</i>     | guanosine monophosphate reductase                                             | NM_057188                     | -1,30 | metabolic process                     |
| <i>Laptm4b</i>  | lysosomal protein transmembrane 4 beta                                        | NM_001013174                  | -1,30 | transport                             |
| <i>Sorcs2</i>   | sortilin-related VPS10 domain containing receptor 2                           | NM_001107225                  | -1,30 |                                       |
| <i>Taf10</i>    | TAF10 RNA polymerase II, TATA box binding protein (TBP)-associated factor     | NM_001134735                  | -1,30 | G1/S transition of mitotic cell cycle |
| <i>Asns</i>     | asparagine synthetase                                                         | NM_013079                     | -1,30 | liver development                     |

\* *P* value = 0.029, was obtained by permutation analysis. Fold change  $\geq 1.3$ .
