# Supplementary material
Source: publisher figshare collection journal article supplement (https://karger.figshare.com/articles/dataset/_/5123515)
Supplement: Supplementary file 6 [file 1]

**Supplemental table 5: List of genes regulated by aging in the hypothalamus**

| Gene Symbol                          | Gene Title                                                                       | RefSeq Transcript ID                        | Fold change | Gene Ontology Biological Process                                     |
|--------------------------------------|----------------------------------------------------------------------------------|---------------------------------------------|-------------|----------------------------------------------------------------------|
| <b>Up-regulated</b>                  |                                                                                  |                                             |             |                                                                      |
| <i>C3</i>                            | complement component 3                                                           | NM_016994                                   | <b>5,39</b> | positive regulation of type IIa hypersensitivity                     |
| <i>C4-2 /// C4b</i>                  | complement component 4, gene 2 /// complement component 4B (Chido blood group)   | NM_001002805 /// NM_031504                  | <b>3,58</b> | inflammatory response                                                |
| <i>RT1-A2 /// RT1-A3 /// RT1-EC2</i> | RT1 class Ia, locus A2 /// RT1 class I, locus A3 /// RT1 class Ib, locus EC2     | NM_001008829 /// NM_001008830 /// NM_012645 | <b>3,47</b> | positive regulation of T cell mediated cytotoxicity                  |
| <i>Psmb8</i>                         | proteasome (prosome, macropain) subunit, beta type 8 (large multifunctional pept | NM_080767                                   | <b>2,54</b> | antigen processing and presentation                                  |
| <i>Gpnmb</i>                         | glycoprotein (transmembrane) nmb                                                 | NM_133298                                   | <b>2,52</b> | osteoblast differentiation                                           |
| <i>Fcgr2a /// Fcgr2b</i>             | Fc fragment of IgG, low affinity IIa, receptor (CD32) /// Fc fragment of IgG, lo | NM_053843 /// NM_175756                     | <b>2,50</b> | antibody-dependent cellular cytotoxicity                             |
| <i>Bst2</i>                          | bone marrow stromal cell antigen 2                                               | NM_198134                                   | <b>2,37</b> | positive regulation of I-kappaB kinase/NF-kappaB cascade             |
| <i>Rsad2</i>                         | radical S-adenosyl methionine domain containing 2                                | NM_138881                                   | <b>2,12</b> | ossification                                                         |
| <i>Psmb9</i>                         | proteasome (prosome, macropain) subunit, beta type 9 (large multifunctional pept | NM_012708                                   | <b>2,11</b> | antigen processing and presentation                                  |
| <i>Fcgr3a</i>                        | Fc fragment of IgG, low affinity IIIa, receptor                                  | NM_207603                                   | <b>2,00</b> | NK T cell proliferation                                              |
| <i>Cp</i>                            | ceruloplasmin                                                                    | NM_012532                                   | <b>1,96</b> | liver development                                                    |
| <i>Lgals3bp</i>                      | lectin, galactoside-binding, soluble, 3 binding protein                          | NM_139096                                   | <b>1,95</b> | cell adhesion                                                        |
| <i>Emr1</i>                          | EGF-like module containing, mucin-like, hormone receptor-like 1                  | NM_001007557                                | <b>1,95</b> | signal transduction                                                  |
| <i>Igfbp3</i>                        | insulin-like growth factor binding protein 3                                     | NM_012588                                   | <b>1,90</b> | regulation of cell growth                                            |
| <i>Icam1</i>                         | intercellular adhesion molecule 1                                                | NM_012967                                   | <b>1,89</b> | ovarian follicle development                                         |
| <i>Anxa4</i>                         | annexin A4                                                                       | NM_024155                                   | <b>1,86</b> | exocytosis                                                           |
| <i>RT1-CE12</i>                      | RT1 class I, locus CE12                                                          | NM_001008835                                | <b>1,85</b> | antigen processing and presentation of peptide antigen via MHC class |
| <i>Hspb1</i>                         | heat shock protein 1                                                             | NM_031970                                   | <b>1,85</b> | anti-apoptosis                                                       |
| <i>C1qa</i>                          | complement component 1, q subcomponent, A chain                                  | NM_001008515                                | <b>1,84</b> | complement activation, classical pathway                             |
| <i>Lcp1</i>                          | lymphocyte cytosolic protein 1                                                   | NM_001012044                                | <b>1,82</b> | T cell activation involved in immune response                        |
| <i>Gbp2</i>                          | guanylate binding protein 2                                                      | NM_133624                                   | <b>1,77</b> |                                                                      |
| <i>Pqlc3</i>                         | PQ loop repeat containing 3                                                      | NM_001034952                                | <b>1,76</b> |                                                                      |
| <i>Aif1</i>                          | allograft inflammatory factor 1                                                  | NM_017196                                   | <b>1,76</b> | positive regulation of protein phosphorylation                       |
| <i>Dusp6</i>                         | Dual specificity phosphatase 6                                                   | NM_053883                                   | <b>1,75</b> | inactivation of MAPK activity                                        |
| <i>Grm2</i>                          | glutamate receptor, metabotropic 2                                               | NM_001105711                                | <b>1,73</b> | signal transduction                                                  |
| <i>Cd4</i>                           | Cd4 molecule                                                                     | NM_012705                                   | <b>1,71</b> | cytokine production                                                  |
| <i>Acer2</i>                         | alkaline ceramidase 2                                                            | NM_001107943                                | <b>1,70</b> | negative regulation of cell-matrix adhesion                          |
| <i>Cyp27a1</i>                       | cytochrome P450, family 27, subfamily a, polypeptide 1                           | NM_178847                                   | <b>1,68</b> | steroid catabolic process                                            |
| <i>Crym</i>                          | crystallin, mu                                                                   | NM_053955                                   | <b>1,68</b> | negative regulation of transcription from RNA polymerase II promoter |
| <i>C2</i>                            | complement component 2                                                           | NM_172222                                   | <b>1,67</b> | proteolysis                                                          |
| <i>Cenpj</i>                         | centromere protein J                                                             | NM_001107265                                | <b>1,66</b> | centriole replication                                                |
| <i>Cml3</i>                          | camello-like 3                                                                   | XM_001074100 /// XM_575585                  | <b>1,64</b> | gastrulation with mouth forming second                               |

|                        |                                                                                  |                                             |             |                                                                        |
|------------------------|----------------------------------------------------------------------------------|---------------------------------------------|-------------|------------------------------------------------------------------------|
| <i>Ms4a6b</i>          | membrane-spanning 4-domains, subfamily A, member 6B                              | NM_001006975                                | <b>1,63</b> |                                                                        |
| <i>Tyrobp</i>          | Tyrosine protein tyrosine kinase binding protein                                 | NM_212525                                   | <b>1,63</b> | intracellular signaling pathway                                        |
| <i>RT1-EC2</i>         | RT1 class Ib, locus EC2                                                          | NM_012645                                   | <b>1,63</b> | antigen processing and presentation of peptide antigen via MHC class   |
| <i>Ctsz</i>            | cathepsin Z                                                                      | NM_183330                                   | <b>1,63</b> | proteolysis                                                            |
| <i>Cfh</i>             | complement factor H                                                              | NM_130409                                   | <b>1,62</b> | complement activation                                                  |
| <i>Plek</i>            | pleckstrin                                                                       | NM_001025750                                | <b>1,62</b> | hemopoietic progenitor cell differentiation                            |
| <i>Rab27a</i>          | RAB27A, member RAS oncogene family                                               | NM_017317                                   | <b>1,61</b> | protein targeting                                                      |
| <i>Fam189a2</i>        | family with sequence similarity 189, member A2                                   | XM_001078764 /// XM_219909                  | <b>1,61</b> |                                                                        |
| <i>Smagp</i>           | small trans-membrane and glycosylated protein                                    | NM_182817                                   | <b>1,61</b> |                                                                        |
| <i>Fcgr1g</i>          | Fc fragment of IgE, high affinity I, receptor for; gamma polypeptide             | NM_001131001                                | <b>1,60</b> | positive regulation of type IIa hypersensitivity                       |
| <i>C1qc</i>            | complement component 1, q subcomponent, C chain                                  | NM_001008524                                | <b>1,59</b> | complement activation, classical pathway                               |
| <i>Pycard</i>          | PYD and CARD domain containing                                                   | NM_172322                                   | <b>1,58</b> | proteolysis                                                            |
| <i>Pcdhb9</i>          | protocadherin beta 9                                                             | NM_001109390                                | <b>1,56</b> | cell adhesion                                                          |
| <i>Ifit3</i>           | interferon-induced protein with tetratricopeptide repeats 3                      | NM_001007694                                | <b>1,55</b> |                                                                        |
| <i>Pbld</i>            | phenazine biosynthesis-like protein domain containing                            | NM_138530                                   | <b>1,54</b> | biosynthetic process                                                   |
| <i>Tspo</i>            | translocator protein                                                             | NM_012515                                   | <b>1,53</b> | steroid biosynthetic process                                           |
| <i>Tmc4</i>            | transmembrane channel-like 4                                                     | NM_001034104                                | <b>1,52</b> |                                                                        |
| <i>Stat1 /// Stat4</i> | signal transducer and activator of transcription 1 /// signal transducer and act | NM_001012226 /// NM_001034164 /// NM_032612 | <b>1,52</b> | transcription                                                          |
| <i>Tmem176a</i>        | transmembrane protein 176A                                                       | NM_001039008                                | <b>1,51</b> |                                                                        |
| <i>Adpgk</i>           | ADP-dependent glucokinase                                                        | NM_001100723                                | <b>1,50</b> | carbohydrate metabolic process                                         |
| <i>Aadat</i>           | aminoadipate aminotransferase                                                    | NM_017193                                   | <b>1,49</b> | 2-oxoglutarate metabolic process                                       |
| <i>Ube2l6</i>          | ubiquitin-conjugating enzyme E2L 6                                               | NM_001024755                                | <b>1,49</b> | modification-dependent protein catabolic process                       |
| <i>Cd53</i>            | Cd53 molecule                                                                    | NM_012523                                   | <b>1,48</b> | regulation of growth                                                   |
| <i>Uba7</i>            | ubiquitin-like modifier activating enzyme 7                                      | NM_001106856                                | <b>1,48</b> | protein modification process                                           |
| <i>Anxa3</i>           | Annexin A3                                                                       | NM_012823                                   | <b>1,47</b> | phagocytosis                                                           |
| <i>Clec7a</i>          | C-type lectin domain family 7, member a                                          | NM_001173386 /// XM_001067977 /// XM_578404 | <b>1,47</b> | response to yeast                                                      |
| <i>Serpina3n</i>       | serine (or cysteine) peptidase inhibitor, clade A, member 3N                     | NM_031531                                   | <b>1,47</b> | inflammatory response                                                  |
| <i>C1qb</i>            | complement component 1, q subcomponent, B chain                                  | NM_019262                                   | <b>1,47</b> | immune response                                                        |
| <i>Grxcr1</i>          | glutaredoxin, cysteine rich 1                                                    | NM_001191935 /// XM_001077572 /// XM_573590 | <b>1,46</b> | sensory perception of sound                                            |
| <i>Alb</i>             | albumin                                                                          | NM_134326                                   | <b>1,45</b> | transport                                                              |
| <i>Blnk</i>            | B-cell linker                                                                    | NM_001025767                                | <b>1,44</b> | intracellular signaling pathway                                        |
| <i>Ptpn6</i>           | protein tyrosine phosphatase, non-receptor type 6                                | NM_053908                                   | <b>1,44</b> | negative regulation of humoral immune response mediated by circulating |
| <i>Rac2</i>            | ras-related C3 botulinum toxin substrate 2                                       | NM_001008384                                | <b>1,44</b> | GTP catabolic process                                                  |
| <i>Irf9</i>            | interferon regulatory factor 9                                                   | NM_001012041                                | <b>1,43</b> | transcription                                                          |
| <i>Npc2</i>            | Niemann-Pick disease, type C2                                                    | NM_173118                                   | <b>1,42</b> | response to virus                                                      |
| <i>Calca</i>           | calcitonin-related polypeptide alpha                                             | NM_001033955 /// NM_001033956 /// NM_017338 | <b>1,41</b> | endothelial cell proliferation                                         |
| <i>Rnaset2</i>         | ribonuclease T2                                                                  | NM_001106210                                | <b>1,41</b> |                                                                        |
| <i>Dsp</i>             | desmoplakin                                                                      | XM_001058477 /// XM_225259                  | <b>1,41</b> | cell-cell adhesion                                                     |
| <i>Lap3</i>            | leucine aminopeptidase 3                                                         | NM_001011910                                | <b>1,40</b> | proteolysis                                                            |

|                  |                                                             |                                                                               |             |                                                                      |
|------------------|-------------------------------------------------------------|-------------------------------------------------------------------------------|-------------|----------------------------------------------------------------------|
| <i>RT1-CE5</i>   | RT1 class I, locus CE5                                      | NM_001008843 /// NM_001033986                                                 | <b>1,40</b> | antigen processing and presentation of peptide antigen via MHC class |
| <i>Csf1r</i>     | colony stimulating factor 1 receptor                        | NM_001029901                                                                  | <b>1,40</b> | protein phosphorylation                                              |
| <i>Tap2</i>      | transporter 2, ATP-binding cassette, sub-family B (MDR/TAP) | NM_032056                                                                     | <b>1,40</b> | positive regulation of T cell mediated cytotoxicity                  |
| <i>Tnfaip8l2</i> | tumor necrosis factor, alpha-induced protein 8-like 2       | NM_001014039                                                                  | <b>1,40</b> | innate immune response                                               |
| <i>Laptm5</i>    | lysosomal protein transmembrane 5                           | NM_053538                                                                     | <b>1,39</b> | transport                                                            |
| <i>Casp4</i>     | caspase 4, apoptosis-related cysteine peptidase             | NM_053736                                                                     | <b>1,39</b> | proteolysis                                                          |
| <i>S100a9</i>    | S100 calcium binding protein A9                             | NM_053587                                                                     | <b>1,38</b> | chronic inflammatory response                                        |
| <i>Cidea</i>     | cell death-inducing DFFA-like effector a                    | NM_001170467                                                                  | <b>1,37</b> | temperature homeostasis                                              |
| <i>Ephx1</i>     | epoxide hydrolase 1, microsomal                             | NM_001034090 /// NM_012844                                                    | <b>1,37</b> | cellular aromatic compound metabolic process                         |
| <i>Ptprc</i>     | protein tyrosine phosphatase, receptor type, C              | NM_001109887 /// NM_001109888 /// NM_001109889 /// NM_001109890 /// NM_138507 | <b>1,37</b> | activation of MAPK activity                                          |
| <i>Gldc</i>      | glycine dehydrogenase (decarboxylating)                     | NM_001107583                                                                  | <b>1,37</b> | cellular amino acid metabolic process                                |
| <i>Anxa11</i>    | annexin A11                                                 | NM_001011918                                                                  | <b>1,36</b> | phagocytosis                                                         |
| <i>Hck</i>       | hemopoietic cell kinase                                     | NM_013185                                                                     | <b>1,36</b> | protein phosphorylation                                              |
| <i>Unc93b1</i>   | unc-93 homolog B1 (C. elegans)                              | NM_001108513                                                                  | <b>1,36</b> | toll-like receptor signaling pathway                                 |
| <i>Gadd45b</i>   | growth arrest and DNA-damage-inducible, beta                | NM_001008321                                                                  | <b>1,36</b> | activation of MAPKK activity                                         |
| <i>Ifit2</i>     | interferon-induced protein with tetratricopeptide repeats 2 | NM_001024753                                                                  | <b>1,36</b> | cellular response to interferon-alpha                                |
| <i>Cd37</i>      | CD37 molecule                                               | NM_017124                                                                     | <b>1,36</b> | positive regulation of immunoglobulin production                     |
| <i>Ctse</i>      | cathepsin E                                                 | NM_012938                                                                     | <b>1,35</b> | proteolysis                                                          |
| <i>Cyb5r2</i>    | cytochrome b5 reductase 2                                   | NM_001014244                                                                  | <b>1,35</b> | steroid biosynthetic process                                         |
| <i>Pygl</i>      | phosphorylase, glycogen, liver                              | NM_022268                                                                     | <b>1,35</b> | carbohydrate metabolic process                                       |
| <i>Aqp1</i>      | aquaporin 1                                                 | NM_012778                                                                     | <b>1,35</b> | glomerular filtration                                                |
| <i>Gsta3</i>     | glutathione S-transferase A3                                | NM_031509                                                                     | <b>1,35</b> | glutathione metabolic process                                        |
| <i>Zfp36</i>     | zinc finger protein 36                                      | NM_133290                                                                     | <b>1,35</b> | nuclear-transcribed mRNA catabolic process, deadenylation-dependent  |
| <i>B2m</i>       | beta-2 microglobulin                                        | NM_012512                                                                     | <b>1,35</b> | positive regulation of T cell mediated cytotoxicity                  |
| <i>Six4</i>      | SIX homeobox 4                                              | NM_001106739                                                                  | <b>1,35</b> | regulation of transcription, DNA-dependent                           |
| <i>Slfn8</i>     | schlafen 8                                                  | NM_001013970                                                                  | <b>1,34</b> |                                                                      |
| <i>Pls1</i>      | Plastin 1 (I isoform)                                       | NM_001108178                                                                  | <b>1,34</b> |                                                                      |
| <i>Cd48</i>      | Cd48 molecule                                               | NM_139103                                                                     | <b>1,34</b> | signal transduction                                                  |
| <i>Cdh23</i>     | cadherin 23 (otocadherin)                                   | NM_053644                                                                     | <b>1,33</b> | cell adhesion                                                        |
| <i>Fcn1</i>      | ficolin (collagen/fibrinogen domain containing) 1           | NM_031348                                                                     | <b>1,33</b> | signal transduction                                                  |
| <i>Ctss</i>      | cathepsin S                                                 | NM_017320                                                                     | <b>1,33</b> | proteolysis                                                          |
| <i>Kitlg</i>     | KIT ligand                                                  | NM_021843 /// NM_021844                                                       | <b>1,33</b> | ovarian follicle development                                         |
| <i>Sash3</i>     | SAM and SH3 domain containing 3                             | NM_001134992                                                                  | <b>1,32</b> | positive regulation of immunoglobulin production                     |
| <i>Iqgap1</i>    | IQ motif containing GTPase activating protein 1             | NM_001108489                                                                  | <b>1,32</b> | signal transduction                                                  |
| <i>Abca8a</i>    | ATP-binding cassette, sub-family A (ABC1), member 8a        | XM_001081603 /// XM_221100                                                    | <b>1,32</b> |                                                                      |
| <i>Dctd</i>      | dCMP deaminase                                              | NM_001013882 /// NM_001161512                                                 | <b>1,32</b> | nucleotide biosynthetic process                                      |
| <i>Sp110</i>     | SP110 nuclear body protein                                  | NM_001034137                                                                  | <b>1,32</b> | transcription                                                        |
| <i>Dlk1</i>      | delta-like 1 homolog (Drosophila)                           | NM_053744                                                                     | <b>1,32</b> | embryo development                                                   |
| <i>Abcg3l1</i>   | ATP-binding cassette, sub-family G (WHITE), member 3-like 1 | NM_001004076                                                                  | <b>1,32</b> |                                                                      |
| <i>Cmtm7</i>     | CKLF-like MARVEL transmembrane domain containing 7          | NM_001109300                                                                  | <b>1,31</b> |                                                                      |
| <i>Arhgdib</i>   | Rho, GDP dissociation inhibitor (GDI) beta                  | NM_001009600                                                                  | <b>1,31</b> |                                                                      |

|               |                                       |                            |             |                                                                      |
|---------------|---------------------------------------|----------------------------|-------------|----------------------------------------------------------------------|
| <i>Wnk1</i>   | WNK lysine deficient protein kinase 1 | NM_001002823 /// NM_053794 | <b>1,30</b> | positive regulation of systemic arterial blood pressure              |
| <i>Klhl6</i>  | kelch-like 6 (Drosophila)             | NM_001105867               | <b>1,30</b> | germinal center formation                                            |
| <i>Plagl1</i> | pleiomorphic adenoma gene-like 1      | NM_012760                  | <b>1,30</b> | positive regulation of transcription from RNA polymerase II promoter |

#### Down-regulated

|                |                                                                                |                                             |              |                                                                  |
|----------------|--------------------------------------------------------------------------------|---------------------------------------------|--------------|------------------------------------------------------------------|
| <i>Ghrh</i>    | growth hormone releasing hormone                                               | NM_031577                                   | <b>-1,99</b> | G-protein signaling, coupled to cAMP nucleotide second messenger |
| <i>S100g</i>   | S100 calcium binding protein G                                                 | NM_012521                                   | <b>-1,82</b> |                                                                  |
| <i>Cd38</i>    | CD38 molecule                                                                  | NM_013127                                   | <b>-1,79</b> | response to hypoxia                                              |
| <i>Nts</i>     | neurotensin                                                                    | NM_001102381                                | <b>-1,76</b> | regulation of blood vessel size                                  |
| <i>Ccnd2</i>   | cyclin D2                                                                      | NM_022267                                   | <b>-1,72</b> | G1/S transition of mitotic cell cycle                            |
| <i>Pnlip</i>   | pancreatic lipase                                                              | NM_013161                                   | <b>-1,63</b> | lipid metabolic process                                          |
| <i>Scd1</i>    | stearoyl-Coenzyme A desaturase 1                                               | NM_139192                                   | <b>-1,57</b> | lipid metabolic process                                          |
| <i>Mtmr1</i>   | myotubularin related protein 1                                                 | NM_001191725 /// XM_001059230 /// XM_228644 | <b>-1,56</b> | dephosphorylation                                                |
| <i>Wnt4</i>    | wingless-type MMTV integration site family, member 4                           | NM_053402                                   | <b>-1,55</b> | metanephros development                                          |
| <i>Col1a1</i>  | collagen, type I, alpha 1                                                      | NM_053304                                   | <b>-1,52</b> | skeletal system development                                      |
| <i>Mfhas1</i>  | malignant fibrous histiocyoma amplified sequence 1                             | NM_001107316                                | <b>-1,52</b> |                                                                  |
| <i>Tlcd1</i>   | TLC domain containing 1                                                        | NM_001013858                                | <b>-1,51</b> |                                                                  |
| <i>Shisa4</i>  | shisa homolog 4 (Xenopus laevis)                                               | NM_001077826                                | <b>-1,48</b> |                                                                  |
| <i>Col5a2</i>  | collagen, type V, alpha 2                                                      | NM_053488                                   | <b>-1,47</b> | skeletal system development                                      |
| <i>Gal</i>     | galanin prepropeptide                                                          | NM_033237                                   | <b>-1,46</b> | response to stress                                               |
| <i>Tm7sf2</i>  | transmembrane 7 superfamily member 2                                           | NM_001013071                                | <b>-1,45</b> |                                                                  |
| <i>Slc7a10</i> | solute carrier family 7, (neutral amino acid transporter, y+ system) member 10 | NM_053726                                   | <b>-1,45</b> | amino acid transmembrane transport                               |
| <i>Fzd2</i>    | frizzled homolog 2 (Drosophila)                                                | NM_172035                                   | <b>-1,44</b> | cell activation                                                  |
| <i>Nlk</i>     | Nemo like kinase                                                               | NM_001191924 /// XM_001080888 /// XM_573152 | <b>-1,43</b> | protein phosphorylation                                          |
| <i>Pnma12</i>  | PNMA-like 2                                                                    | NM_001107481                                | <b>-1,42</b> |                                                                  |
| <i>Thrsp</i>   | thyroid hormone responsive                                                     | NM_012703                                   | <b>-1,42</b> |                                                                  |
| <i>Tmem100</i> | transmembrane protein 100                                                      | NM_001017479                                | <b>-1,41</b> |                                                                  |
| <i>Hhat1</i>   | hedgehog acyltransferase-like                                                  | NM_001106868                                | <b>-1,41</b> | negative regulation of N-terminal protein palmitoylation         |
| <i>Pop5</i>    | Processing of precursor 5, ribonuclease P/MRP subunit (S. cerevisiae)          | NM_001105752                                | <b>-1,41</b> | tRNA processing                                                  |
| <i>Egr4</i>    | early growth response 4                                                        | NM_019137                                   | <b>-1,40</b> | transcription                                                    |
| <i>Nptx1</i>   | neuronal pentraxin 1                                                           | NM_153735                                   | <b>-1,40</b> |                                                                  |
| <i>Bdh1</i>    | 3-hydroxybutyrate dehydrogenase, type 1                                        | NM_053995                                   | <b>-1,40</b> | liver development                                                |
| <i>Fastkd5</i> | FAST kinase domains 5                                                          | XR_085786 /// XR_086207                     | <b>-1,39</b> |                                                                  |
| <i>Fads2</i>   | fatty acid desaturase 2                                                        | NM_031344                                   | <b>-1,39</b> | lipid metabolic process                                          |
| <i>Sept_11</i> | septin 11                                                                      | NM_001107208                                | <b>-1,39</b> | cell cycle                                                       |
| <i>Ndp</i>     | Norrie disease (pseudoglioma) (human)                                          | NM_001108814                                | <b>-1,38</b> | placenta development                                             |
| <i>Slc40a1</i> | solute carrier family 39 (iron-regulated transporter), member 1                | NM_133315                                   | <b>-1,38</b> | transport                                                        |
| <i>Hcrtr1</i>  | hypocretin (orexin) receptor 1                                                 | NM_013064                                   | <b>-1,38</b> | signal transduction                                              |
| <i>Rras2</i>   | related RAS viral (r-ras) oncogene homolog 2                                   | NM_001013434                                | <b>-1,38</b> | signal transduction                                              |
| <i>Scrg1</i>   | stimulator of chondrogenesis 1                                                 | NM_033499                                   | <b>-1,37</b> |                                                                  |

|                |                                                                                  |                                                              |       |                                                                        |
|----------------|----------------------------------------------------------------------------------|--------------------------------------------------------------|-------|------------------------------------------------------------------------|
| <i>Phkg1</i>   | phosphorylase kinase, gamma 1                                                    | NM_031573                                                    | -1,37 | carbohydrate metabolic process                                         |
| <i>Tmem90b</i> | transmembrane protein 90B                                                        | NM_001025020                                                 | -1,36 | response to biotic stimulus                                            |
| <i>Syt6</i>    | synaptotagmin VI                                                                 | NM_022191                                                    | -1,36 | transport                                                              |
| <i>Col4a5</i>  | collagen, type IV, alpha 5                                                       | XM_001055156 /// XM_343778                                   | -1,36 |                                                                        |
| <i>YdjC</i>    | YdjC homolog (bacterial)                                                         | NM_001013863                                                 | -1,36 | carbohydrate metabolic process                                         |
| <i>Tbl1xr1</i> | transducin (beta)-like 1 X-linked receptor 1                                     | NM_001108941                                                 | -1,36 | negative regulation of gene-specific transcription from RNA polymerase |
| <i>Bbox1</i>   | butyrobetaine (gamma), 2-oxoglutarate dioxygenase (gamma-butyrobetaine hydroxyla | NM_022629                                                    | -1,36 | carnitine biosynthetic process                                         |
| <i>Cyp51</i>   | cytochrome P450, family 51                                                       | NM_012941                                                    | -1,35 | steroid biosynthetic process                                           |
| <i>Sv2b</i>    | synaptic vesicle glycoprotein 2b                                                 | NM_057207                                                    | -1,35 | neurotransmitter uptake                                                |
| <i>Fxyd7</i>   | FXD domain-containing ion transport regulator 7                                  | NM_022008                                                    | -1,35 | transport                                                              |
| <i>Slc1a2</i>  | solute carrier family 1 (glial high affinity glutamate transporter), member 2    | NM_001035233 /// NM_017215                                   | -1,34 | amino acid transmembrane transport                                     |
| <i>Rnf182</i>  | ring finger protein 182                                                          | NM_001109117                                                 | -1,34 | protein ubiquitination                                                 |
| <i>Tmeff1</i>  | transmembrane protein with EGF-like and two follistatin-like domains 1           | NM_023020                                                    | -1,34 | multicellular organismal development                                   |
| <i>Ednrb</i>   | endothelin receptor type B                                                       | NM_017333                                                    | -1,34 | neural crest cell migration                                            |
| <i>Asb1</i>    | ankyrin repeat and SOCS box-containing 1                                         | NM_001108232                                                 | -1,34 | intracellular signaling pathway                                        |
| <i>Timp4</i>   | tissue inhibitor of metalloproteinase 4                                          | NM_001109393                                                 | -1,33 | central nervous system development                                     |
| <i>Slc1a6</i>  | solute carrier family 1 (high affinity aspartate/glutamate transporter), member  | NM_032065                                                    | -1,33 | amino acid transmembrane transport                                     |
| <i>Gamt</i>    | guanidinoacetate N-methyltransferase                                             | NM_012793                                                    | -1,33 | creatine metabolic process                                             |
| <i>Nrarp</i>   | Notch-regulated ankyrin repeat protein                                           | NM_001143750                                                 | -1,33 |                                                                        |
| <i>Sst</i>     | somatostatin                                                                     | NM_012659                                                    | -1,33 | response to acid                                                       |
| <i>Nkain4</i>  | Na <sup>+</sup> /K <sup>+</sup> transporting ATPase interacting 4                | NM_001106550                                                 | -1,32 |                                                                        |
| <i>F2r</i>     | coagulation factor II (thrombin) receptor                                        | NM_012950                                                    | -1,32 | activation of MAPKK activity                                           |
| <i>Pdyn</i>    | prodynorphin                                                                     | NM_019374                                                    | -1,32 | neuropeptide signaling pathway                                         |
| <i>Hmgcr</i>   | 3-hydroxy-3-methylglutaryl-Coenzyme A reductase                                  | NM_013134                                                    | -1,32 | steroid biosynthetic process                                           |
| <i>Mpped1</i>  | metallophosphoesterase domain containing 1                                       | NM_001130569                                                 | -1,32 |                                                                        |
| <i>Cyp2d4</i>  | cytochrome P450, family 2, subfamily d, polypeptide 4                            | NM_138515                                                    | -1,32 | steroid metabolic process                                              |
| <i>Cpxm1</i>   | carboxypeptidase X (M14 family), member 1                                        | NM_001106511                                                 | -1,31 | proteolysis                                                            |
| <i>Metn</i>    | meteorin, glial cell differentiation regulator                                   | NM_001009962                                                 | -1,31 | multicellular organismal development                                   |
| <i>Cyp4f17</i> | cytochrome P450, family 4, subfamily f, polypeptide 17                           | NM_001191986 /// XM_002726858 /// XM_002729769 /// XM_576190 | -1,31 |                                                                        |
| <i>Mllt4</i>   | myeloid/lymphoid or mixed-lineage leukemia (trithorax homolog, Drosophila); tran | NM_013217                                                    | -1,31 | cell adhesion                                                          |
| <i>Acss2</i>   | acyl-CoA synthetase short-chain family member 2                                  | NM_001107793                                                 | -1,31 | acetyl-CoA biosynthetic process                                        |
| <i>Fads1</i>   | fatty acid desaturase 1                                                          | NM_053445                                                    | -1,30 | lipid metabolic process                                                |
| <i>Cyp2d4</i>  | cytochrome P450, family 2, subfamily d, polypeptide 4                            | NM_138515                                                    | -1,30 | steroid metabolic process                                              |
| <i>Sox4</i>    | SRY (sex determining region Y)-box 4                                             | XM_001068302 /// XM_344594                                   | -1,30 | response to hypoxia                                                    |
| <i>Lrrc40</i>  | Leucine rich repeat containing 40                                                | NM_001034926                                                 | -1,30 |                                                                        |
| <i>Gja1</i>    | gap junction protein, alpha 1                                                    | NM_012567                                                    | -1,30 | in utero embryonic development                                         |
| <i>Csrp2</i>   | cysteine and glycine-rich protein 2                                              | NM_177425                                                    | -1,30 | multicellular organismal development                                   |
| <i>Dcx</i>     | doublecortin                                                                     | NM_053379                                                    | -1,30 | neuron migration                                                       |
| <i>Htr1a</i>   | 5-hydroxytryptamine (serotonin) receptor 1A                                      | NM_012585                                                    | -1,30 | signal transduction                                                    |

\* P value = 0.029, was obtained by permutation analysis. Fold change  $\geq 1.3$ .
