# Supplementary material
Source: publisher figshare collection journal article supplement (https://karger.figshare.com/articles/dataset/_/5123515)
Supplement: Supplementary file 7 [file 1]

Supplemental table 3: List of genes regulated by aging, classified by biological functions

A- Anterior Pituitary

| Category                               | # of genes | P value           | Genes                                                                                                                                                                                                                                                                                                                                                                                                                                                                                                                                                                                                                                                                                                                                                                                                                                                                                                                                                                                                                                                                                                                                                                                                                                                                                                                                                     |
|----------------------------------------|------------|-------------------|-----------------------------------------------------------------------------------------------------------------------------------------------------------------------------------------------------------------------------------------------------------------------------------------------------------------------------------------------------------------------------------------------------------------------------------------------------------------------------------------------------------------------------------------------------------------------------------------------------------------------------------------------------------------------------------------------------------------------------------------------------------------------------------------------------------------------------------------------------------------------------------------------------------------------------------------------------------------------------------------------------------------------------------------------------------------------------------------------------------------------------------------------------------------------------------------------------------------------------------------------------------------------------------------------------------------------------------------------------------|
| Cell Death                             | 186        | 1,84E-04-2,32E-02 | <i>Ier3, Gstm5, Rassf6, Clns1a, Ascl1, Ptpkr, Cdc42bpa, Gstp1, Calcr, Prkcz, Tradd, Bcap29, Ace, Cdh1, Camk1g, Igf2, Cdkn1c, Adamts14, Pmp22, Fcgr2a, Itsn1, Ccl11, Appb1, Plscr3, Spp, Ctnnb1, Nol3, Alox15, Soat1, Igfbp1, Adipoq, Pcsk2, Atrx, Exoc2, Chka, Rtn, Cadm1, Lgals3bp, Ehd4, Rgs5, Grb10, Id3, Htra1, Zyx, Inpp1, Fgl2, Meis1, Ryr2, Stmn1, Gpc3, Plat, Sqstm1, Sh3bgrl3, L1cam, Stxbp1, Blcap, Lyz1/Lyz2, Hes1, Snca, Grik2, Gabrg2, Dpp3, Ephx1, Igfbp7, Tnfsf12, Cdkn2c, Xrcc5, Vtn, F2r, Abcc3, Tpp1, Cd82, Sli2, Epor, Camk2b, Gfra3, Ccnd1, Gsdma, Dad1, Snn, Prdm2, Atp6ap2, Jun, Ddx19a, Gria4, Ctbp2, Cdcpl, Capn1, Ap2a2, Ddx41, Gpx2, Pdyn, Reg3g, Kitlg, Sh3kbp1, Aldh1a2, Tubb3, Lgals1, Traf3ip2, Sstr3, Ccnd2, Pnpt1, Klk1, Cables1, Htatip2, Cast, Pcgf2, Six1, Gabrd, Glrx, Fos, Pcnal, Krt18, Prkcz, Cebpd, Cadps2, Ddx20, Nckap11, Vegfa, Hspb8, Map2k6, Ccl13, Mtmr1, Dgkz, C1qa, Gpx4, Nek7, Ndn, Ednra, Sox4, Aatk, Apoe, S100a6, Banf1, Gpm6a, Xdh, Tgfb1, Plcg2, Camk2n1, Aif1, Igfbp3, Copb2, Ivns1abp, Rab25, Mx1, Camk2d, Rps6ka1, Sstr2, Rasd1, Id2, Ctss, Vipr2, Dsp, Agtr1b, Igf1, St6gal1, Anxa4, Tspo, Tmem57, Map2k3, Dgka, Eef2k, Ptgr1, Abcc5, Epas1, Ptpzr1, Rnd3, Aqp1, Cd74, Xpa, Hyou1, Ngb, Col2a1, Dlk1, Rab27a, Hbxip, Hla-Drb1, Amigo2, Timp2, Rgs10, Setd8, Snca, Ntrk2, Atf5, Isg20, Atp5s</i> |
| Cellular Growth and Proliferation      | 127        | 1,93E-04-2,32E-02 | <i>Ier3, Ctdspl, Ltpb4, Rem2, Ascl1, Calcr, Gstp1, Prkcz, Igf2, Cd151, Cdkn1c, Pmp22, Dgkz, Ptp4a3, Lepre1, Ccl11, Appb1, Degs1, Spp1, Alox15, Igfbp1, Adipoq, Chka, Cadm1, Grb10, Id3, Htra1, Zyx, Meis1, Stmn1, Gpc3, Plat, Coro1a, Gfm1, Col1a1, Gltsr2, Etv1, Hes1, Myl9, Flot1, Igfbp7, Tnfsf12, Agtrap, Cdkn2c, Xrcc5, Vtn, F2r, Cd82, Epor, Sli2, Smyd4, Scn5a, Ccnd1, Mltf6, Pold4, Jun, Cdcpl, Capn1, Rbbp9, Kitlg, Aldh1a2, Tubb3, Lgals1, Tusc2, Ccnd2, Pnpt1, Cables1, Cast, Six1, Pcgf2, Fos, C20orf191, Eif5a2, Ltpb3, Cebpd, Vegfa, Hspb8, Map2k6, Ccl13, Nubp1, Gpx4, Ndn, Ednra, Rtn4r, Apoe, Nfix, Ptpn3, Xdh, Bin3, Camk2n1, Aif1, Igfbp3, Ivns1abp, Mx1, Fshb, Rps6ka1, Sstr2, Id2, Rasd1, Ctss, Hopx, Dsp, Rbp4, Igf1, Map2k3, Dgka, Kcnk10, Eef2k, Igh2, Abcc5, Epas1, Aqp1, Tob1, Cd74, Xpa, Diaph1, Vldlr, Col2a1, Dlk1, Steap2, Prdx4, Gga2, Ttpi, Cirbp, Timp2, Atf5, Ntrk2</i>                                                                                                                                                                                                                                                                                                                                                                                                                                                 |
| Cellular Function and Maintenance      | 117        | 4,85E-04-2,27E-02 | <i>Cdc42bpa, Prkcz, Igf2, Scnn1g, Cadps, Cd151, Dgkz, Fcgr2a, Itsn1, Ccl11, Plscr3, Nol3, Spp1, Alox15, Adipoq, Slc2a4, Exoc2, Dopey2, Id3, Ryr2, Stmn1, Coro1a, Sqstm1, Plat, Nefh, L1cam, Stxbp1, Klcl1, Ttyh1, Snca, Grik2, Evi, Gabrg2, Krt25, Pex5l, Xrcc5, Vtn, F2r, Tpp1, Rab3c, Abcc3, Stmn2, Cd82, Epor, Sli2, Scn5a, Ccnd1, Tapbp, Capn1, Ap2a2, Rab3d, Atg9a, Mark1, Kitlg, Tesc, Tubb3, Lgals1, Cdk5rap2, Pcgf2, Cast, Tnr, Kctd13, Krt18, Prkcz, Cadps2, Nckap11, Vegfa, Hspb8, Ccl13, Slc20a2, C1qa, Nubp1, Ndn, Nlgn3, Kcnj11, Rtn4r, Sox4, Apoe, Aatk, Cnih2, Xdh, Hla-Qa1, Gpm6a, Plcg2, Copb2, Rab2b, Camk2d, Aplp2, Id2, Ctss, Dsp, Rbp4, Igf1, Fcgrt, Gabra1, Dgka, Eef2k, Trim54, Arsb, Epas1, Ptpzr1, Rnd3, Aqp1, Lrrc23, Fam101b, Cd74, Diaph1, Slc16a1, Slc12a5, Rab27a, Plxna3, Steap2, Atf1, Cyth2, Exoc7, Ntrk2, Syne1</i>                                                                                                                                                                                                                                                                                                                                                                                                                                                                                                     |
| Cellular Assembly and Organization     | 82         | 6,59E-04-2,47E-02 | <i>Mark1, Kitlg, Tubb3, Ascl1, Cdc42bpa, Cdk5rap2, Cast, Prkcz, Tnr, Igf2, Cadps, Kctd13, Krt18, Prkcz, Pmp22, Fcgr2a, Cadps2, Ptp4a3, Lppr5, Nckap11, Ccl11, Vegfa, Spp1, Gphn, Nol3, Adipoq, Ccl13, C1qa, Ndn, Nlgn3, Dopey2, Rtn4r, Ehd4, Aatk, Apoe, Gpm6a, Plcg2, Igfbp3, Copb2, Stmn1, Sqstm1, Coro1a, Plat, Nefh, L1cam, Ctss, Klcl1, Ttyh1, Snca, Dsp, Igf1, Mtmr2, Evi, Krt25, Trim54, Amigo1, Vtn, Arsb, Epas1, F2r, Ptpzr1, Tpp1, Stmn2, Rab3c, Rnd3, Aqp1, Cd82, Sli2, Fam101b, Cd74, Diaph1, Rab27a, Plxna3, Atf1, Gga2, Cyth2, Exoc7, Snca, Ntrk2, Rab3d, Lrrc4c, Syne1</i>                                                                                                                                                                                                                                                                                                                                                                                                                                                                                                                                                                                                                                                                                                                                                                 |
| Cellular Development                   | 79         | 1,93E-04-2,47E-02 | <i>Ier3, Kitlg, Tubb3, Aldh1a2, Lgals1, Rem2, Ascl1, Tusc2, Ccnd2, Pnpt1, Calcr, Six1, Cast, Prkcz, Ace, Igf2, Fos, Cd151, Cdkn1c, Cebpd, Dgkz, Pmp22, Fcgr2a, Ptp4a3, Cadps2, Ccl11, Vegfa, Degs1, Hspb8, Spp1, Alox15, Map2k6, Ccl13, Adipoq, Lhb, Pcsk2, Chka, Fig4, Ndn, Cadm1, Apoe, Id3, Plcg2, Aif1, Igfbp3, Ivns1abp, Stmn1, Grb14, Plat, Sqstm1, Col1a1, L1cam, Rasd1, Id2, Hes1, Hopx, Igf1, Vwc2, Map2k3, Dgka, Tnfsf12, Trim54, Abcc5, F2r, Epor, Smyd4, Gfra3, Ccnd1, Mltf6, Vldlr, Tapbp, Pold4, Dlk1, Steap2, Jun, Ttpi, Cdcpl, Timp2, Ntrk2</i>                                                                                                                                                                                                                                                                                                                                                                                                                                                                                                                                                                                                                                                                                                                                                                                           |
| Cell-To-Cell Signaling and Interaction | 76         | 3,75E-04-2,47E-02 | <i>Kitlg, Mltf4, Lgals1, Ascl1, Ccnd2, Cast, Prkcz, Gabrd, Tnr, Ace, Fos, Igf2, Cd151, Cdkn1c, Bcan, Pmp22, Fcgr2a, Ptp4a3, Grk6, Ccl11, Vegfa, Gphn, Spp1, Alox15, Adipoq, Ccl13, Syn2, Nlgn3, Cadm1, Lgals3bp, Apoe, Vangl1, Cnih2, Id3, Gpm6a, Xdh, Cspg5, Igfbp3, Bsn, Serping1, Gpc3, Plat, Col1a1, L1cam, Id2, Stxbp1, Hes1, Snca, Grik2, Agtr1b, Mtmr2, Igf1, St6gal1, Esm1, Nrnx1, Amigo3, Gabrg2, Kcnk10, Trim54, Agtrap, Vtn, Amigo1, F2r, Cd82, Sli2, Cd74, Ccnd1, Lamc2, Diaph1, Slc12a5, Col2a1, Gria4, Cdcpl, Amigo2, Snca, Ntrk2</i>                                                                                                                                                                                                                                                                                                                                                                                                                                                                                                                                                                                                                                                                                                                                                                                                       |
| Cellular Movement                      | 72         | 8,97E-04-2,41E-02 | <i>Ier3, Kitlg, Lgals1, Hdllbp, C4b, Htatip2, Cast, Prkcz, Tnr, Igf2, Fos, Cd151, Prkcz, Bcan, Fcgr2a, Itsn1, Ptp4a3, Grk6, Nckap11, Ccl11, Vegfa, Batf3, Spp1, Igfbp1, Adipoq, Ccl13, Cfb, Ednra, Cadm1, Apoe, S100a6, Vangl1, Xdh, Nfix, Zyx, Igfbp3, Serping1, Stmn1, Mx1, Plat, Coro1a, Fshb, Col1a1, Aplp2, Sstr2, L1cam, Etv1, Id2, Ctss, Igf1, Esm1, Podxl2, Tnfsf12, Lmo4, Vtn, F2r, Epas1, Ptpzr1, Rnd3, Cd82, Sli2, Scn5a, Cd74, Ccnd1, Diaph1, Jun, Ctbp2, Capn1, Timp2, Cyth2, Ntrk2, Cldn7</i>                                                                                                                                                                                                                                                                                                                                                                                                                                                                                                                                                                                                                                                                                                                                                                                                                                               |
| Molecular Transport                    | 64         | 4,85E-04-2,3E-02  | <i>Kitlg, Lgals1, Calcr, Cast, Cpt1a, Prkcz, Fos, Igf2, Elovl5, Cadps, Pmp22, Fcgr2a, Cadps2, Itsn1, Grk6, Ccl11, Vegfa, Spp1, Alox15, Soat1, Ccl13, Adipoq, Slc2a4, Exoc2, Trhr, Ednra, Kcnj11, Apoe, Ppargc1b, Xdh, Plcg2, Rab2b, Ryr2, Aco2, Camk2d, L1cam, Sstr2, Stxbp1, Lyz1/Lyz2, Snca, Atp2b3, Agtr1b, Igf1, Fcgrt, Dgka, Igfbp7, Agtrap, Apod, Pex5l, F2r, Epas1, Rab3c, Pde6d, Epor, Hyou1, Vldlr, Abcc8, Dlk1, Pnpla2, Rab27a, Steap2, Acsl1, Exoc7, Rab3d</i>                                                                                                                                                                                                                                                                                                                                                                                                                                                                                                                                                                                                                                                                                                                                                                                                                                                                                 |
| Small Molecule Biochemistry            | 53         | 4,85E-04-2,41E-02 | <i>Sh3kbp1, Kitlg, Plch2, Htatip2, Prkcz, Cpt1a, Igf2, Fos, Elovl5, Pex7, Fcgr2a, Ccl11, Vegfa, Spp1, Soat1, Alox15, Adipoq, Ccl13, Csgalnact1, Mtmr1, Slc2a4, Gpx4, Chka, Fig4, Ednra, Trhr, Apoe, Ppargc1b, Xdh, Csgalnact2, Plcg2, Aco2, Sstr2, Snca, Agtr1b, Mtmr2, Igf1, Dgka, Igfbp7, Agtrap, Apod, Ppap2b, Vtn, Epas1, F2r, Ptgr2, Cd74, Vldlr, Chpt1, Dlk1, Pnpla2, Ppapdc1b, Acsl1</i>                                                                                                                                                                                                                                                                                                                                                                                                                                                                                                                                                                                                                                                                                                                                                                                                                                                                                                                                                           |
| Cell Cycle                             | 50         | 2,2E-04-2,38E-02  | <i>Kitlg, Lgals1, Tusc2, Ccnd2, Pnpt1, Calcr, Cables1, Cast, Fos, Igf2, Tmpo, Cdkn1c, Cebpd, Dgkz, Appb1, Vegfa, Degs1, Rprm, Alox15, Adipoq, Map2k6, Chka, Apoe, Grb10, Id3, Camk2n1, Igfbp3, Ppap2c, Camk2d, Sstr2, Pola1, Id2, Hes1, Igf1, Map2k3, Igfbp7, Cdkn2c, Xrcc5, Epor, Camk2b, Ccnd1, Xpa, Babam1, Pold4, Jun, Camk1, Timp2, Ap2a2, Setd8, Atf5</i>                                                                                                                                                                                                                                                                                                                                                                                                                                                                                                                                                                                                                                                                                                                                                                                                                                                                                                                                                                                           |

|                                            |    |                   |                                                                                                                                                                                                                                                                                                                         |
|--------------------------------------------|----|-------------------|-------------------------------------------------------------------------------------------------------------------------------------------------------------------------------------------------------------------------------------------------------------------------------------------------------------------------|
| Lipid Metabolism                           | 44 | 2,71E-03-2,41E-02 | <i>Sh3kbp1, Kitlg, Acot2, Sstr2, Plch2, Snca, Cpt1a, Mtmr2, Igf1, Igf2, Elovl5, Igfbp7, Apod, Fcgr2a, Pex7, Vtn, Ppap2b, F2r, Epas1, Ccl11, Vegfa, Soat1, Ptgr2, Alox15, Adipoq, Ccl13, Cd74, Mtmr1, Slc2a4, Vldlr, Chpt1, Chka, Gpx4, Fig4, Trhr, Ednra, Dlk1, Pnpla2, Ppapdc1b, Apoe, Ppargc1b, Acs11, Xdh, Plcg2</i> |
| Cell Morphology                            | 35 | 2,25E-03-2,36E-02 | <i>Kitlg, Plat, Coro1a, L1cam, Snca, Cast, Tnr, Igf1, Evi, Krt18, Map2k3, Cdkn1c, Tnfsf12, Pmp22, Fcgr2a, Vtn, Lppr5, F2r, Stmn2, Ccl11, Vegfa, Cd82, Slt2, Ccl13, Diaph1, Ndn, Nlgn3, Rtn4r, Jun, Apoe, Sncb, Rab3d, Xdh, Plcg2, Igfbp3</i>                                                                            |
| Cell Signaling                             | 31 | 1,25E-02-1,25E-02 | <i>Ryr2, Lgals1, Camk2d, L1cam, Lys1/Lyz2, Calcr, Cast, Atp2b3, Agtr1b, Igf1, Igf2, Fos, Igfbp7, Pmp22, Fcgr2a, Grk6, F2r, Ccl11, Pde6d, Vegfa, Epor, Spp1, Ccl13, Hyou1, Abcc8, Trhr, Ednra, Kcnj11, Apoe, Xdh, Plcg2</i>                                                                                              |
| Vitamin and Mineral Metabolism             | 31 | 1,25E-02-1,25E-02 | <i>Ryr2, Lgals1, Camk2d, L1cam, Lys1/Lyz2, Calcr, Cast, Atp2b3, Agtr1b, Igf1, Igf2, Fos, Igfbp7, Pmp22, Fcgr2a, Grk6, F2r, Ccl11, Pde6d, Vegfa, Epor, Spp1, Ccl13, Hyou1, Abcc8, Trhr, Ednra, Kcnj11, Apoe, Xdh, Plcg2</i>                                                                                              |
| Carbohydrate Metabolism                    | 28 | 4,85E-04-2,3E-02  | <i>Sh3kbp1, Plch2, Htatip2, Cpt1a, Prkcz, Agtr1b, Igf1, Mtmr2, Igf2, Dgka, Mfng, Fcgr2a, Vtn, Vegfa, Spp1, Alox15, Ccl13, Adipoq, Csgalnact1, Mtmr1, Slc2a4, Chpt1, Chka, Gpx4, Fig4, Trhr, Plcg2, Csgalnact2</i>                                                                                                       |
| Post-Translational Modification            | 22 | 2,52E-03-7,3E-03  | <i>Tpp1, Vegfa, Ltbp4, Plat, Bace2, Alox15, C4b, Pcsk2, Diaph1, Ctss, Cndp2, Wfdc2, Prkcz, Gpx4, Igf1, Ace, Apoe, Enpep, Dpp3, Capn1, Timp2, Xdh</i>                                                                                                                                                                    |
| Cellular Compromise                        | 20 | 5,84E-03-2,41E-02 | <i>Stmn2, Pdyn, Epor, Spp1, Sqstm1, Plat, Adipoq, Plod1, Nefh, Snca, Six1, Igf1, Cadm1, Igf2, Apoe, Krt18, Acs11, Exoc7, Ntrk2, Xrcc5</i>                                                                                                                                                                               |
| Protein Degradation                        | 18 | 6,87E-03-6,87E-03 | <i>Tpp1, Ltbp4, Plat, Bace2, Alox15, C4b, Pcsk2, Diaph1, Cndp2, Ctss, Wfdc2, Ace, Igf1, Apoe, Enpep, Dpp3, Capn1, Timp2</i>                                                                                                                                                                                             |
| Protein Synthesis                          | 18 | 6,87E-03-6,87E-03 | <i>Tpp1, Ltbp4, Plat, Bace2, Alox15, C4b, Pcsk2, Diaph1, Cndp2, Ctss, Wfdc2, Ace, Igf1, Apoe, Enpep, Dpp3, Capn1, Timp2</i>                                                                                                                                                                                             |
| Antigen Presentation                       | 16 | 7,3E-03-2,36E-02  | <i>Epas1, Nckap11, Vegfa, Slt2, Spp1, Coro1a, Cd74, Ccl13, Adipoq, Ccnd1, Tnr, Ednra, Apoe, Cd151, Fcgr2a, Vtn</i>                                                                                                                                                                                                      |
| Drug Metabolism                            | 8  | 6,48E-04-7,07E-03 | <i>Gstm5, Glrx, Agtr1b, Fos, Xdh, Agtrap, Gstp1, Snca</i>                                                                                                                                                                                                                                                               |
| Gene Expression                            | 5  | 7,3E-03-2,27E-02  | <i>Jun, Ccnd1, Id3, Id2, Cdkn2c</i>                                                                                                                                                                                                                                                                                     |
| Protein Folding                            | 2  | 7,3E-03-7,3E-03   | <i>Prkcz, Vegfa</i>                                                                                                                                                                                                                                                                                                     |
| DNA Replication, Recombination, and Repair | 2  | 2,27E-02-2,27E-02 | <i>Pcna, Xrcc5</i>                                                                                                                                                                                                                                                                                                      |

## B- Hypothalamus

| Category                               | # of genes | P value           | Genes                                                                                                                                                                                                                                                                                                                                                                                                                                                                                                                                 |
|----------------------------------------|------------|-------------------|---------------------------------------------------------------------------------------------------------------------------------------------------------------------------------------------------------------------------------------------------------------------------------------------------------------------------------------------------------------------------------------------------------------------------------------------------------------------------------------------------------------------------------------|
| Cell Death                             | 78         | 7,08E-11-7,58E-03 | <i>Cd48, Calcb, Pdyn, S100a9, Kitlg, Uba7, Ccnd2, Gadd45b, Ndp, Cd38, Nts, Casp4, Ptpn6, Egr4, Timp4, Cd4, Sst, Ctse, Scd, Slc40a1, Alb, Fcgr3a, Fcgr2a, Gja1, Ghrh, Hla-C, Cfh, Mtmr1, Gsta1, C1qa, Hck, Gal, Sox4, C3, Bst2, Psmb8, Dcx, Acer2, Igfbp3, Aif1, Csf1r, Cd53, B2m, Wnt4, Ptprc, Dusp6, Col1a1, Zfp36, Hspb1, Fcgr2b, Dsp, Ednrb, Slc1a2, Anxa4, Tspo, Grm2, Nptx1, Ephx1, Pycard, F2r, Anxa11, Aqp1, Sp110, Icam1, Serpina3, Rac2, Fcer1g, Cidea, Irf9, Six4, Dlk1, Rras2, Rab27a, Tyrobp, Stat1, Hcrr1, Nlk, Blnk</i> |
| Cellular Growth and Proliferation      | 71         | 9,46E-08-7,26E-03 | <i>Cd48, Calcb, Kitlg, S100a9, Ccnd2, Gadd45b, Ndp, Cd38, Ptpn6, Nts, Egr4, Timp4, Sst, Cd4, Alb, Hmgcr, Clec7a, Gpnmb, Fcgr3a, Gja1, Ghrh, Psmb9, Fads2, Gbp2, Tmeff1, Hck, Sash3, Htr1a, Gal, Fads1, Sox4, C3, Bst2, Psmb8, Dcx, Acer2, Igfbp3, Aif1, Csf1r, B2m, Wnt4, Ptprc, Dusp6, Col1a1, Ifit3, Ube2l6, Ctss, Nrarp, Plagl1, Zfp36, Dsp, Fcgr2b, Ednrb, Slc1a2, Tspo, Lcp1, Cd37, Pycard, F2r, Anxa11, Aqp1, Icam1, Rac2, Fcer1g, Six4, Dlk1, Stat1, Tyrobp, Hcrr1, Cdh23, Blnk</i>                                            |
| Cell-To-Cell Signaling and Interaction | 57         | 1,54E-12-7,26E-03 | <i>Cd48, Calcb, Kitlg, S100a9, Mlt4, Ccnd2, C4b, Ndp, Cd38, Nts, Ptpn6, Plek, Slc1a6, Cd4, Sst, Clec7a, Fcgr2a, Fcgr3a, Gja1, Ghrh, Hla-C, Psmb9, Cfh, Sash3, Hck, C1qa, Htr1a, Tnfaiip82, Gal, Fzd2, Nv2b, Lgals3bp, C3, Bst2, Psmb8, Igfbp3, Csf1r, B2m, Wnt4, Ptprc, Ctss, Ube2l6, Fcgr2b, Slc1a2, Grm2, Lcp1, Nptx1, Pycard, F2r, Icam1, Rac2, Fcer1g, Rras2, Rab27a, Tyrobp, Stat1, Hcrr1</i>                                                                                                                                    |
| Small Molecule Biochemistry            | 57         | 5,37E-07-7,06E-03 | <i>Calcb, Kitlg, Mlt4, S100a9, C4b, Cd38, Npc2, Nts, Plek, Cyp4f8, Slc1a6, Cd4, Sst, Clec7a, Hmgcr, Alb, Scd, Fcgr2a, Ghrh, Cfh, Fads2, Gsta1, Htr1a, Cyp27a1, Fzd2, Gal, Fads1, C3, Acss2, Igfbp3, Aif1, Csf1r, B2m, Wnt4, Thrsp, Ptprc, Arhgdib, Ctss, Slc7a10, Fcgr2b, Ednrb, Slc1a2, Cyp2d6, Tspo, Grm2, Ephx1, Crym, F2r, Cyp51a1, Icam1, Pnlip, Fcer1g, Dlk1, Rab27a, Tyrobp, Stat1, Cp</i>                                                                                                                                     |
| Cellular Function and Maintenance      | 52         | 2,25E-07-7,74E-03 | <i>Calcb, Kitlg, S100a9, Cd38, Ptpn6, Nts, Plek, Cenpj, Slc1a6, Sst, Cd4, Alb, Clec7a, Slc40a1, Fcgr2a, Fcgr3a, Gja1, Ghrh, Hck, C1qa, Htr1a, Gal, Sox4, C3, Bst2, Anxa3, Dcx, Csf1r, B2m, Wnt4, Ptprc, Arhgdib, Iqgap1, Ctss, Nrarp, Hspb1, Fcgr2b, Dsp, Pygl, Ednrb, Grm2, Lcp1, Pycard, F2r, Aqp1, Icam1, Rac2, Fcer1g, Rras2, Stat1, Tyrobp, Cp</i>                                                                                                                                                                               |
| Cellular Development                   | 49         | 2,15E-06-7,26E-03 | <i>Calcb, Kitlg, Ccnd2, Gadd45b, Cd38, Ptpn6, Cd4, Sst, Ctse, Sept11, Alb, Scd, Clec7a, Fcgr2a, Gja1, Fads2, Fzd2, Sox4, C3, Dcx, Igfbp3, Csf1r, B2m, Wnt4, Ptprc, Plagl1, Nrarp, Zfp36, Fcgr2b, Dsp, C1qc, Slc1a2, Ednrb, Lcp1, Grxcr1, Cyp51a1, Icam1, Metrn, Rac2, Fcer1g, Dlk1, Rras2, Rab27a, Stat1, Tyrobp, Asb1, Cdh23, Nlk, Blnk</i>                                                                                                                                                                                          |
| Cell Signaling                         | 48         | 4,39E-08-7,72E-03 | <i>Cd48, Calcb, S100a9, Csf1r, Kitlg, B2m, Wnt4, Ptprc, C4b, Gadd45b, Cd38, Casp4, Nts, Hspb1, Zfp36, Ptpn6, Fcgr2b, Ednrb, Tspo, Grm2, Cd4, Sst, Clec7a, Alb, Fcgr3a, Fcgr2a, Pycard, F2r, Gja1, Ghrh, Icam1, Hla-C, Hck, Rac2, Htr1a, Fcer1g, Fzd2, Gal, Irf9, Tyrobp, Stat1, C3, Bst2, Wnk1, Nlk, Aif1, Blnk, Igfbp3</i>                                                                                                                                                                                                           |
| Cellular Movement                      | 47         | 1,97E-10-7,26E-03 | <i>Cd48, Kitlg, Csf1r, S100a9, Ptprc, Iqgap1, Arhgdib, C4b, Col1a1, Ndp, Ctss, Cd38, Ptpn6, Nts, Fcgr2b, Slc1a2, Ednrb, Tspo, Lcp1, Nptx1, Sst, Cd4, Ctse, C2, Hmgcr, Alb, Fcgr3a, Fcgr2a, Pycard, F2r, Gja1, Aqp1, Icam1, Cfh, Serpina3, Hck, Rac2, Fcer1g, Six4, Rras2, Tyrobp, Stat1, C3, Anxa3, Dcx, Igfbp3, Aif1</i>                                                                                                                                                                                                             |
| Molecular Transport                    | 47         | 4,39E-08-7,72E-03 | <i>Calcb, Csf1r, Kitlg, S100a9, B2m, Wnt4, Ptprc, C4b, Ctss, Cd38, Slc7a10, Ptpn6, Nts, Fcgr2b, Ednrb, Slc1a2, Grm2, Sst, Cd4, Crym, Slc40a1, Scd, Hmgcr, Alb, Clec7a, Fcgr3a, Fcgr2a, F2r, Ghrh, Icam1, Hla-C, Cfh, Fads2, Gsta1, Hck, Rac2, Htr1a, Cyp27a1, Fcer1g, Fzd2, Gal, Dlk1, Rab27a, Tyrobp, Cp, C3, Blnk</i>                                                                                                                                                                                                               |

|                                    |    |                   |                                                                                                                                                                                                                                                     |
|------------------------------------|----|-------------------|-----------------------------------------------------------------------------------------------------------------------------------------------------------------------------------------------------------------------------------------------------|
| Vitamin and Mineral Metabolism     | 37 | 4,39E-08-7,72E-03 | <i>Calcb, Csf1r, Kitlg, S100a9, B2m, Wnt4, Ptprc, C4b, Cd38, Nts, Ptpn6, Fcgr2b, Ednrb, Tspo, Grm2, Sst, Cd4, Scd, Hmgcr, Alb, Clec7a, Fcgr3a, Fcgr2a, F2r, Cyp51a1, Ghrh, Hla-C, Icam1, Hck, Rac2, Htr1a, Cyp27a1, Fcer1g, Fzd2, Gal, C3, Blnk</i> |
| Lipid Metabolism                   | 35 | 3E-05-7,06E-03    | <i>Kitlg, Csf1r, Wnt4, Thrsp, Ctss, Cd38, Nts, Npc2, Fcgr2b, Slc1a2, Cyp2d6, Cyp4f8, Ednrb, Tspo, Cd4, Ephx1, Alb, Hmgcr, Clec7a, Scd, Fcgr2a, F2r, Cyp51a1, Ghrh, Icam1, Fads2, Gsta1, Pnlip, Fcer1g, Cyp27a1, Gal, Dlk1, Fads1, C3, Acss2</i>     |
| Antigen Presentation               | 31 | 1,36E-07-7,06E-03 | <i>Cd48, Csf1r, Kitlg, S100a9, Ptprc, C4b, Ube2l6, Ctss, Cd38, Ptpn6, Fcgr2b, Ednrb, Cd4, Ctse, Clec7a, Fcgr2a, F2r, Icam1, Hla-C, Psmb9, Cfh, Serpina3, C1qa, Rac2, Hck, Fcer1g, Rab27a, Stat1, Tyrobp, C3, Psmb8</i>                              |
| Post-Translational Modification    | 22 | 1,2E-06-1,73E-04  | <i>F2r, Cd48, Csf1r, Kitlg, Ptprc, Dusp6, Ccnd2, Hck, Fcer1g, Ptpn6, Phkg1, Fcgr2b, Ednrb, Cp, Tyrobp, Cd4, Wnk1, Alb, Fcgr2a, Nlk, Igfbp3, Aif1</i>                                                                                                |
| Cellular Assembly and Organization | 22 | 8,78E-04-7,74E-03 | <i>F2r, Gja1, S100a9, Aqp1, Csf1r, Kitlg, Icam1, Arhgdib, Iqgap1, Pls1, Rac2, C1qa, Ctss, Htr1a, Dsp, Gal, Plek, Cenpj, Lcp1, Bst2, Dcx, Fcgr2a</i>                                                                                                 |
| Cell Morphology                    | 22 | 1,34E-03-7,26E-03 | <i>F2r, Kitlg, S100a9, Ghrh, B2m, Icam1, Hck, Hspb1, Ptpn6, Nts, Dsp, Plek, Dlk1, Ednrb, Grm2, Bst2, Sst, Cd4, Fcgr2a, Pycard, Blnk, Igfbp3</i>                                                                                                     |
| Cellular Compromise                | 21 | 5,61E-08-6,41E-03 | <i>Gja1, Kitlg, S100a9, Icam1, Wnt4, Cfh, Ptprc, C4b, Hck, Rac2, Cd38, Fcer1g, Fcgr2b, Rab27a, Tyrobp, Cd4, Bst2, C3, Anxa3, Alb, Fcgr2a</i>                                                                                                        |
| Carbohydrate Metabolism            | 19 | 2,26E-04-5,8E-03  | <i>F2r, Kitlg, Csf1r, Icam1, Ptprc, Dusp6, Htr1a, Cd38, Fcer1g, Nts, Phkg1, Fcgr2b, Plek, Pygl, Gal, Dlk1, Scd, Fcgr2a, Igfbp3</i>                                                                                                                  |
| Nucleic Acid Metabolism            | 14 | 1E-03-5,86E-03    | <i>F2r, Calcb, Mlt4, Ghrh, Icam1, Cfh, Ptprc, Arhgdib, Htr1a, Nts, Gal, Grm2, Cd4, Sst</i>                                                                                                                                                          |
| Free Radical Scavenging            | 13 | 1,59E-03-2,37E-03 | <i>F2r, Pdyn, Icam1, Cfh, Arhgdib, Iqgap1, Hck, Rac2, Hspb1, Ptpn6, Fcer1g, Alb, Fcgr2a</i>                                                                                                                                                         |
| Amino Acid Metabolism              | 9  | 1,73E-04-3,48E-03 | <i>Nts, Ednrb, Slc1a2, Cp, Slc1a6, Sst, Crym, Alb, Slc7a10</i>                                                                                                                                                                                      |
| Cell Cycle                         | 8  | 5,15E-04-5,23E-03 | <i>Fcgr2b, Kitlg, Stat1, Cd37, Col1a1, Fcgr2a, Blnk, Cd38</i>                                                                                                                                                                                       |
| Protein Trafficking                | 3  | 5,23E-03-5,23E-03 | <i>Ednrb, Icam1, C3</i>                                                                                                                                                                                                                             |
| Energy Production                  | 2  | 1,73E-04-1,73E-04 | <i>Cp, Alb</i>                                                                                                                                                                                                                                      |
| Drug Metabolism                    | 2  | 5,15E-04-5,15E-04 | <i>Cyp2d6, Alb</i>                                                                                                                                                                                                                                  |
