# Supplementary material
Source: publisher figshare collection journal article supplement (https://karger.figshare.com/articles/dataset/_/5123515)
Supplement: Supplementary file 8 [file 1]

**Supplemental table 8: List of canonical pathways significantly represented by genes regulated with LTMCR**

**A- Anterior Pituitary**

| <b>Ingenuity Canonical Pathways</b>                        | <b>-log(p-value)</b> | <b>Ratio</b> | <b>Molecules</b>                                  |
|------------------------------------------------------------|----------------------|--------------|---------------------------------------------------|
| Circadian Rhythm Signaling                                 | 3,98                 | 0,13         | <i>Bhlhe41, Cry2, Per2, Arntl</i>                 |
| Androgen and Estrogen Metabolism                           | 1,97                 | 0,04         | <i>Sts, Csgalnact1, Arsb</i>                      |
| Glycosaminoglycan Degradation                              | 1,96                 | 0,08         | <i>Mgea5, Arsb</i>                                |
| Crosstalk between Dendritic Cells and Natural Killer Cells | 1,91                 | 0,04         | <i>Pvrl2, Hla-E, Camk2d</i>                       |
| Glycolysis/Gluconeogenesis                                 | 1,71                 | 0,04         | <i>Pdhx, Galm, Pfkp</i>                           |
| Tight Junction Signaling                                   | 1,63                 | 0,03         | <i>Pvrl2, Jam2, Myh14, Myh6</i>                   |
| Coagulation System                                         | 1,57                 | 0,06         | <i>F2r, Tfp1</i>                                  |
| Protein Ubiquitination Pathway                             | 1,54                 | 0,02         | <i>Hspa1a/Hspa1b, Birc3, Dnajb1, Dnaja1, Usp2</i> |
| Calcium Signaling                                          | 1,50                 | 0,02         | <i>Myh14, Myh6, Chrn4, Camk2d</i>                 |
| Alanine and Aspartate Metabolism                           | 1,50                 | 0,05         | <i>Pdhx, Asns</i>                                 |
| Galactose Metabolism                                       | 1,47                 | 0,05         | <i>Gaa, Pfkp</i>                                  |

**B- Hypothalamus**

| <b>Ingenuity Canonical Pathways</b>                       | <b>-log(p-value)</b> | <b>Ratio</b> | <b>Molecules</b>                  |
|-----------------------------------------------------------|----------------------|--------------|-----------------------------------|
| Circadian Rhythm Signaling                                | 3,86                 | 0,10         | <i>Cry1, Per2, Nr1d1</i>          |
| Cytotoxic T Lymphocyte-mediated Apoptosis of Target Cells | 3,67                 | 0,06         | <i>Casp8, Rt1-N2, Rt1-T24-3</i>   |
| Allograft Rejection Signaling                             | 2,34                 | 0,04         | <i>Rt1-N2, Rt1-T24-3</i>          |
| OX40 Signaling Pathway                                    | 2,10                 | 0,03         | <i>Rt1-N2, Rt1-T24-3</i>          |
| Endothelin-1 Signaling                                    | 1,97                 | 0,02         | <i>Gna14, Casp8, Pla2g3</i>       |
| Phospholipid Degradation                                  | 1,71                 | 0,02         | <i>Gna14, Pla2g3</i>              |
| Huntington's Disease Signaling                            | 1,60                 | 0,01         | <i>Hspa1a/Hspa1b, Casp8, Tgm2</i> |
| Apoptosis Signaling                                       | 1,54                 | 0,02         | <i>Casp8, Gas2</i>                |
| Atherosclerosis Signaling                                 | 1,48                 | 0,02         | <i>Apoa1, Pla2g3</i>              |
| Sphingosine-1-phosphate Signaling                         | 1,44                 | 0,02         | <i>Gna14, Casp8</i>               |
| Neuropathic Pain Signaling In Dorsal Horn Neurons         | 1,42                 | 0,02         | <i>Gna14, Camk1g</i>              |
| Cdc42 Signaling                                           | 1,38                 | 0,02         | <i>Rt1-N2, Rt1-T24-3</i>          |
| Glycerophospholipid Metabolism                            | 1,38                 | 0,02         | <i>Gna14, Pla2g3</i>              |
| Synaptic Long Term Depression                             | 1,30                 | 0,02         | <i>Gna14, Pla2g3</i>              |
