# Supplementary material
Source: publisher figshare collection journal article supplement (https://karger.figshare.com/articles/dataset/_/5123515)
Supplement: Supplementary file 9 [file 1]

**Supplemental table 10: List of genes regulated by soy diet in the anterior pituitary**

**A- Anterior pituitary**

| Gene Symbol           | Gene Title                                                               | RefSeq Transcript ID                                                          | Fold change  | Gene Ontology Biological Process                                     |
|-----------------------|--------------------------------------------------------------------------|-------------------------------------------------------------------------------|--------------|----------------------------------------------------------------------|
| <b>Up-regulated</b>   |                                                                          |                                                                               |              |                                                                      |
| <i>Dusp26</i>         | dual specificity phosphatase 26 (putative)                               | NM_001012352                                                                  | <b>2,61</b>  | protein dephosphorylation                                            |
| <i>Sncg</i>           | synuclein, gamma (breast cancer-specific protein 1)                      | NM_031688                                                                     | <b>2,16</b>  | peripheral nervous system development                                |
| <i>Tspy14</i>         | TSPY-like 4                                                              | NM_001012075                                                                  | <b>1,69</b>  | nucleosome assembly                                                  |
| <i>Slc16a13</i>       | Solute carrier family 16, member 13 (monocarboxylic acid transporter 13) | NM_001005530                                                                  | <b>1,34</b>  | transport                                                            |
| <i>RT1-S3</i>         | RT1 class Ib, locus S3                                                   | NM_001008886                                                                  | <b>1,33</b>  | positive regulation of T cell mediated cytotoxicity                  |
| <i>Nckap1l</i>        | NCK associated protein 1 like                                            | NM_001108119                                                                  | <b>1,32</b>  | B cell homeostasis                                                   |
| <i>Plk5</i>           | polo-like kinase 5                                                       | NM_001170557 /// XM_001076512 /// XM_234920                                   | <b>1,32</b>  | protein phosphorylation                                              |
| <i>Rab33a</i>         | RAB33A, member of RAS oncogene family                                    | NM_001108257                                                                  | <b>1,32</b>  | small GTPase mediated signal transduction                            |
| <i>Dnmt3a</i>         | DNA (cytosine-5-)-methyltransferase 3 alpha                              | NM_001003957 /// NM_001003958                                                 | <b>1,31</b>  | negative regulation of transcription from RNA polymerase II promoter |
| <i>Hfe</i>            | hemochromatosis                                                          | NM_001173434 /// NM_001173435 /// NM_053301                                   | <b>1,30</b>  | antigen processing and presentation of peptide antigen via MHC class |
| <i>Fry</i>            | Furry homolog (Drosophila)                                               | NM_001170398                                                                  | <b>1,30</b>  |                                                                      |
| <b>Down-regulated</b> |                                                                          |                                                                               |              |                                                                      |
| <i>Robo2</i>          | roundabout, axon guidance receptor, homolog 2 (Drosophila)               | NM_032106                                                                     | <b>-2,20</b> | luteolysis                                                           |
| <i>Vegfa</i>          | vascular endothelial growth factor A                                     | NM_001110333 /// NM_001110334 /// NM_001110335 /// NM_001110336 /// NM_031836 | <b>-2,08</b> | angiogenesis                                                         |
| <i>Fam122b</i>        | family with sequence similarity 122B                                     | NM_001166586                                                                  | <b>-2,07</b> |                                                                      |
| <i>Lum</i>            | lumican                                                                  | NM_031050                                                                     | <b>-2,06</b> | response to organic cyclic substance                                 |
| <i>Nqo2</i>           | NAD(P)H dehydrogenase, quinone 2                                         | NM_001004214                                                                  | <b>-1,99</b> | memory                                                               |
| <i>Cgln1</i>          | cingulin-like 1                                                          | NM_001108164                                                                  | <b>-1,75</b> |                                                                      |
| <i>F2r</i>            | coagulation factor II (thrombin) receptor                                | NM_012950                                                                     | <b>-1,71</b> | activation of MAPKK activity                                         |
| <i>Cmb1</i>           | carboxymethylenebutenolidase homolog (Pseudomonas)                       | NM_001008770                                                                  | <b>-1,66</b> |                                                                      |
| <i>Retsat</i>         | retinol saturase (all trans retinol 13,14 reductase)                     | NM_145084                                                                     | <b>-1,59</b> | retinol metabolic process                                            |
| <i>Raph1</i>          | Ras association (RalGDS/AF-6) and pleckstrin homology domains 1          | NM_001108798                                                                  | <b>-1,58</b> | signal transduction                                                  |
| <i>Sec61a2</i>        | Sec61 alpha 2 subunit (S. cerevisiae)                                    | NM_001170343                                                                  | <b>-1,57</b> | transport                                                            |
| <i>Phka1</i>          | Phosphorylase kinase, alpha 1                                            | NM_022626                                                                     | <b>-1,57</b> | carbohydrate metabolic process                                       |

|                 |                                                                              |                                                |       |                                                                                                                              |
|-----------------|------------------------------------------------------------------------------|------------------------------------------------|-------|------------------------------------------------------------------------------------------------------------------------------|
| <i>Ehd3</i>     | EH-domain containing 3                                                       | NM_138890                                      | -1,54 | cAMP catabolic process<br>in utero embryonic development                                                                     |
| <i>Pde10a</i>   | phosphodiesterase 10A                                                        | NM_022236                                      | -1,54 |                                                                                                                              |
| <i>Gja1</i>     | gap junction protein, alpha 1                                                | NM_012567                                      | -1,53 |                                                                                                                              |
| <i>Clec16a</i>  | C-type lectin domain family 16, member A                                     | XM_002724483 /// XM_213209                     | -1,51 |                                                                                                                              |
| <i>Hrsp12</i>   | heat-responsive protein 12                                                   | NM_031714                                      | -1,47 | induction of apoptosis<br>cell adhesion<br>cation transport<br>proteolysis<br>protein methylation<br>blood vessel maturation |
| <i>Timp3</i>    | TIMP metalloproteinase inhibitor 3                                           | NM_012886                                      | -1,46 |                                                                                                                              |
| <i>Dsg2</i>     | desmoglein 2                                                                 | XM_001054396 /// XM_226112                     | -1,46 |                                                                                                                              |
| <i>Slc41a3</i>  | solute carrier family 41, member 3                                           | NM_001037492                                   | -1,45 |                                                                                                                              |
| <i>Npepl1</i>   | aminopeptidase-like 1                                                        | NM_001107806                                   | -1,45 |                                                                                                                              |
| <i>MGC72974</i> | hypothetical LOC316976                                                       | NM_198772                                      | -1,43 |                                                                                                                              |
| <i>Reck</i>     | reversion-inducing-cysteine-rich protein with kazal motifs                   | NM_001107954                                   | -1,43 |                                                                                                                              |
| <i>H2afj</i>    | H2A histone family, member J                                                 | NM_001109610                                   | -1,42 | nucleosome assembly<br>tricarboxylic acid cycle<br>G1 phase of mitotic cell cycle<br>cell cycle                              |
| <i>Aco1</i>     | aconitase 1, soluble                                                         | NM_017321                                      | -1,42 |                                                                                                                              |
| <i>Cdk1</i>     | cyclin-dependent kinase 1                                                    | NM_019296                                      | -1,41 |                                                                                                                              |
| <i>Cks2</i>     | CDC28 protein kinase regulatory subunit 2                                    | NM_001126083                                   | -1,40 |                                                                                                                              |
| <i>Ttc19</i>    | tetratricopeptide repeat domain 19                                           | NM_001109644                                   | -1,40 | carbohydrate metabolic process<br>regulation of cell growth                                                                  |
| <i>Ganab</i>    | glucosidase, alpha; neutral AB                                               | NM_001106334                                   | -1,39 |                                                                                                                              |
| <i>Hsd3b7</i>   | hydroxy-delta-5-steroid dehydrogenase, 3 beta- and steroid delta-isomerase 7 | NM_139329                                      | -1,38 |                                                                                                                              |
| <i>Ctps</i>     | CTP synthase                                                                 | NM_001134873                                   | -1,38 | pyrimidine nucleotide biosynthetic process<br>ovulation from ovarian follicle                                                |
| <i>Cbr1</i>     | carbonyl reductase 1 /// inducible carbonyl reductase-like                   | NM_019170 /// XM_002727460 /// XM_002727863    | -1,38 |                                                                                                                              |
| <i>Syngn2</i>   | synaptogyrin 2                                                               | NM_053553                                      | -1,37 | protein targeting<br>cell morphogenesis                                                                                      |
| <i>Atp2b2</i>   | ATPase, Ca++ transporting, plasma membrane 2                                 | NM_012508                                      | -1,36 |                                                                                                                              |
| <i>Cbfb</i>     | core-binding factor, beta subunit                                            | NM_001013191                                   | -1,36 | ossification<br>translation<br>DNA replication                                                                               |
| <i>Gfm1</i>     | G elongation factor, mitochondrial 1                                         | NM_053625                                      | -1,36 |                                                                                                                              |
| <i>Kctd13</i>   | potassium channel tetramerisation domain containing 13                       | NM_198736                                      | -1,36 |                                                                                                                              |
| <i>Lsm12</i>    | LSM12 homolog (S. cerevisiae)                                                | NM_001105843                                   | -1,36 | regulation of cell growth                                                                                                    |
| <i>Igfbp7</i>   | insulin-like growth factor binding protein 7                                 | NM_001013048                                   | -1,35 |                                                                                                                              |
| <i>Klc1</i>     | kinesin light chain 1                                                        | NM_001081972 /// NM_001081973 /// NM_001081974 | -1,35 | axon cargo transport                                                                                                         |
| <i>Dnajc30</i>  | DnaJ (Hsp40) homolog, subfamily C, member 30                                 | NM_001109024                                   | -1,35 |                                                                                                                              |
| <i>Ar</i>       | androgen receptor                                                            | NM_012502                                      | -1,35 | in utero embryonic development                                                                                               |
| <i>Zfyve27</i>  | zinc finger, FYVE domain containing 27                                       | NM_199104                                      | -1,35 |                                                                                                                              |
| <i>Snx7</i>     | sorting nexin 7                                                              | NM_001012083                                   | -1,35 | cell communication<br>respiratory system process<br>neuron migration<br>protein dephosphorylation                            |
| <i>Rab3a</i>    | RAB3A, member RAS oncogene family                                            | NM_013018                                      | -1,34 |                                                                                                                              |
| <i>Pex7</i>     | peroxisomal biogenesis factor 7                                              | NM_001034147                                   | -1,33 |                                                                                                                              |
| <i>Ptpn3</i>    | Protein tyrosine phosphatase, non-receptor type 3                            | XM_001055793 /// XM_001059757                  | -1,33 |                                                                                                                              |
| <i>Pcbp3</i>    | poly(rC) binding protein 3                                                   | NM_001011945                                   | -1,32 |                                                                                                                              |

|                |                                                                                        |              |       |                                |
|----------------|----------------------------------------------------------------------------------------|--------------|-------|--------------------------------|
| <i>Mtus1</i>   | mitochondrial tumor suppressor 1                                                       | NM_178093    | -1,32 | cell cycle                     |
| <i>Cd151</i>   | CD151 molecule (Raph blood group)                                                      | NM_022523    | -1,32 | hemidesmosome assembly         |
| <i>Polr2g</i>  | polymerase (RNA) II (DNA directed)<br>polypeptide G                                    | NM_053948    | -1,31 | transcription                  |
| <i>Vdac1</i>   | voltage-dependent anion channel 1                                                      | NM_031353    | -1,31 | behavioral fear response       |
| <i>Mthfd1</i>  | methylenetetrahydrofolate dehydrogenase<br>(NADP+ dependent) 1,<br>methenyltetrahydrof | NM_022508    | -1,30 | histidine biosynthetic process |
| <i>Racgap1</i> | Rac GTPase-activating protein 1                                                        | NM_001108112 | -1,30 | cytokinesis                    |
| <i>Mcart1</i>  | mitochondrial carrier triple repeat 1                                                  | NM_001024785 | -1,30 | transport                      |
| <i>Rbm18</i>   | RNA binding motif protein 18                                                           | NM_001107838 | -1,30 |                                |
| <i>Mrps18a</i> | mitochondrial ribosomal protein S18A                                                   | NM_198756    | -1,30 | translation                    |
| <i>Znrf2</i>   | zinc and ring finger 2                                                                 | NM_001108628 | -1,30 |                                |
| <i>Fktn</i>    | fukutin                                                                                | NM_001108667 | -1,30 |                                |
| <i>Cib2</i>    | calcium and integrin binding family<br>member 2                                        | NM_001015010 | -1,30 |                                |

## B-Hypothalamus

| Gene Symbol           | Gene Title                                                               | RefSeq Transcript ID       | Fold change | Gene Ontology Biological Process                |
|-----------------------|--------------------------------------------------------------------------|----------------------------|-------------|-------------------------------------------------|
| <b>Up-regulated</b>   |                                                                          |                            |             |                                                 |
| <i>Ero1l</i>          | ERO1-like (S. cerevisiae)                                                | NM_138528                  | 1,49        | protein folding                                 |
| <i>Fitm2</i>          | fat storage-inducing transmembrane<br>protein 2                          | NM_001107799               | 1,48        | regulation of triglyceride biosynthetic process |
| <i>Rexo4</i>          | REX4, RNA exonuclease 4 homolog (S.<br>cerevisiae)                       | NM_001033884               | 1,42        |                                                 |
| <i>Tspyl4</i>         | TSPY-like 4                                                              | NM_001012075               | 1,42        | nucleosome assembly                             |
| <i>Rprd1a</i>         | Regulation of nuclear pre-mRNA domain<br>containing 1A                   | XM_001056597 /// XM_214609 | 1,39        |                                                 |
| <i>Myst3</i>          | MYST histone acetyltransferase<br>(monocytic leukemia) 3                 | NM_001100570               | 1,38        | nucleosome assembly                             |
| <i>Tmem144</i>        | transmembrane protein 144                                                | NM_001108551               | 1,37        |                                                 |
| <i>Cit</i>            | Citron                                                                   | NM_001029911               | 1,35        | mitotic sister chromatid segregation            |
| <i>Pdyn</i>           | prodynorphin                                                             | NM_019374                  | 1,34        | neuropeptide signaling pathway                  |
| <i>Pop5</i>           | Processing of precursor 5, ribonuclease<br>P/MRP subunit (S. cerevisiae) | NM_001105752               | 1,33        | tRNA processing                                 |
| <i>Nf1</i>            | neurofibromin 1                                                          | NM_012609                  | 1,31        | MAPKKK cascade                                  |
| <i>Susd2</i>          | sushi domain containing 2                                                | NM_001106381               | 1,30        | immune response                                 |
| <b>Down-regulated</b> |                                                                          |                            |             |                                                 |
| <i>Coq10b</i>         | coenzyme Q10 homolog B (S. cerevisiae)                                   | NM_001009671               | -1,31       |                                                 |

|                |                          |              |              |                                                                      |
|----------------|--------------------------|--------------|--------------|----------------------------------------------------------------------|
| <i>Ston2</i>   | Stonin 2                 | NM_001135874 | <b>-1,39</b> | intracellular protein transport                                      |
| <i>Tnnc2</i>   | troponin C type 2 (fast) | NM_001037351 | <b>-1,41</b> | skeletal muscle contraction                                          |
| <i>Fmod</i>    | fibromodulin             | NM_080698    | <b>-1,47</b> | wound healing                                                        |
| <i>RT1-EC2</i> | RT1 class Ib, locus EC2  | NM_012645    | <b>-1,49</b> | antigen processing and presentation of peptide antigen via MHC class |

---

\* *P* value = 0.029, was obtained by permutation analysis. Fold change  $\geq 1.3$ .
