# Supplementary material
Source: publisher figshare collection journal article supplement (https://karger.figshare.com/articles/dataset/_/5123515)
Supplement: Supplementary file 10 [file 1]

**Supplemental table S11: List of genes regulated by soy, classified by biological functions**

**A- Anterior Pituitary**

| Category                                   | # of genes | P value           | Genes                                                                                                                           |
|--------------------------------------------|------------|-------------------|---------------------------------------------------------------------------------------------------------------------------------|
| Cellular Growth and Proliferation          | 19         | 3,28E-04-2,02E-02 | <i>Cbfb, F2r, Gja1, Timp3, Cks2, Vegfa, Sncg, Gfm1, Reck, Cdk1, Mthfd1, Mtus1, Vdac1, Ar, Cd151, Igfbp7, Lum, Ptpn3, Hsd3b7</i> |
| Cellular Assembly and Organization         | 17         | 1,49E-04-2,24E-02 | <i>Cbfb, F2r, Nckap1l, Gja1, Timp3, Vegfa, Sncg, Rab3a, Gfm1, Reck, Cdk1, Klc1, Vdac1, Robo2, Kctd13, Ar, Lum</i>               |
| Small Molecule Biochemistry                | 16         | 1,6E-03-2,34E-02  | <i>F2r, Aco1, Gja1, Vegfa, Sncg, Dnmt3a, Hfe, Cdk1, Mthfd1, Ctgs, Vdac1, Ar, Igfbp7, Pex7, Atp2b2, Pde10a</i>                   |
| Cellular Movement                          | 15         | 1,49E-04-2,43E-02 | <i>F2r, Cbfb, Nckap1l, Gja1, Timp3, Vegfa, Sncg, Reck, Cdk1, Nqo2, Robo2, Ar, Cd151, Lum, Pex7</i>                              |
| Cellular Function and Maintenance          | 14         | 1,52E-04-2,31E-02 | <i>F2r, Gja1, Aco1, Timp3, Vegfa, Hla-E, Rab3a, Hfe, Cdk1, Vdac1, Ar, Cd151, Dsg2, Atp2b2</i>                                   |
| Cell Morphology                            | 14         | 2,02E-04-2E-02    | <i>F2r, Cbfb, Gja1, Timp3, Vegfa, Sncg, Racgap1, Reck, Robo2, Ar, Cd151, Igfbp7, Lum, Atp2b2</i>                                |
| Cell-To-Cell Signaling and Interaction     | 10         | 1,31E-03-2E-02    | <i>F2r, Timp3, Gja1, Vegfa, Sncg, Ar, Cd151, Rab3a, Dsg2, Vdac1</i>                                                             |
| Molecular Transport                        | 8          | 3,24E-03-2E-02    | <i>F2r, Gja1, Aco1, Hfe, Rab3a, Pde10a, Atp2b2, Vdac1</i>                                                                       |
| Cellular Development                       | 7          | 1,37E-03-2E-02    | <i>Timp3, Gja1, Vegfa, Ar, Gfm1, Igfbp7, Lum</i>                                                                                |
| Nucleic Acid Metabolism                    | 7          | 1,6E-03-2,06E-02  | <i>F2r, Gja1, Cdk1, Ctgs, Pde10a, Atp2b2, Vdac1</i>                                                                             |
| Cell Cycle                                 | 7          | 2,52E-03-2,36E-02 | <i>Cks2, Vegfa, Ar, Igfbp7, Racgap1, Ttc19, Cdk1</i>                                                                            |
| Cell Signaling                             | 7          | 5,04E-03-1,63E-02 | <i>Nckap1l, Gja1, Vegfa, Hfe, Cdk1, Atp2b2, Vdac1</i>                                                                           |
| Gene Expression                            | 7          | 5,04E-03-2E-02    | <i>Cbfb, Aco1, Dnmt3a, Ar, Hrsp12, Cdk1, Dusp26</i>                                                                             |
| Cellular Compromise                        | 6          | 4,48E-03-1,5E-02  | <i>Gja1, Vegfa, Sncg, Ar, Hfe, Racgap1</i>                                                                                      |
| Cell Death                                 | 5          | 5,04E-03-2E-02    | <i>F2r, Gja1, Vegfa, Lum, Vdac1</i>                                                                                             |
| Lipid Metabolism                           | 4          | 2,87E-03-1,5E-02  | <i>F2r, Vegfa, Igfbp7, Pex7</i>                                                                                                 |
| Energy Production                          | 4          | 3,24E-03-2,06E-02 | <i>F2r, Gja1, Cdk1, Vdac1</i>                                                                                                   |
| Vitamin and Mineral Metabolism             | 4          | 5,04E-03-1,18E-02 | <i>Gja1, Vegfa, Atp2b2, Vdac1</i>                                                                                               |
| Protein Synthesis                          | 4          | 1E-02-1,63E-02    | <i>Nckap1l, Hrsp12, Hfe, Cdk1</i>                                                                                               |
| Antigen Presentation                       | 4          | 1,46E-02-1,5E-02  | <i>F2r, Nckap1l, Vegfa, Cd151</i>                                                                                               |
| Post-Translational Modification            | 4          | 1,5E-02-1,63E-02  | <i>Nckap1l, Vegfa, Hfe, Cdk1</i>                                                                                                |
| Carbohydrate Metabolism                    | 3          | 5,04E-03-1,5E-02  | <i>Aco1, Atp2b2, Vdac1</i>                                                                                                      |
| DNA Replication, Recombination, and Repair | 3          | 1E-02-2E-02       | <i>Vegfa, Dnmt3a, Cdk1</i>                                                                                                      |
| Drug Metabolism                            | 2          | 2,87E-03-2,87E-03 | <i>Vegfa, Igfbp7</i>                                                                                                            |
| RNA Post-Transcriptional Modification      | 2          | 7,51E-03-7,51E-03 | <i>Aco1, Cdk1</i>                                                                                                               |
| Amino Acid Metabolism                      | 2          | 2E-02-2,34E-02    | <i>Dnmt3a, Mthfd1</i>                                                                                                           |

**B- Hypothalamus**

| Category                                   | # of genes | P value           | Genes                          |
|--------------------------------------------|------------|-------------------|--------------------------------|
| Cellular Assembly and Organization         | 4          | 1,21E-03-4,14E-02 | <i>Ston2, Fmod, Nf1, Cit</i>   |
| Molecular Transport                        | 4          | 1,21E-03-4,72E-02 | <i>Nf1, Pdyn, Hla-C, Ero1l</i> |
| Cell Death                                 | 3          | 1,21E-03-3,09E-02 | <i>Fmod, Nf1, Hla-C</i>        |
| Cell-To-Cell Signaling and Interaction     | 3          | 1,21E-03-2,5E-02  | <i>Nf1, Pdyn, Hla-C</i>        |
| Cellular Growth and Proliferation          | 3          | 1,21E-03-4,72E-02 | <i>Nf1, Hla-C, Cit</i>         |
| Small Molecule Biochemistry                | 3          | 6,01E-03-2,03E-02 | <i>Nf1, Pdyn, Ero1l</i>        |
| Cellular Development                       | 3          | 9,61E-03-4,94E-02 | <i>Nf1, Cit, Ero1l</i>         |
| Cellular Compromise                        | 2          | 1,21E-03-2,15E-02 | <i>Pdyn, Cit</i>               |
| DNA Replication, Recombination, and Repair | 2          | 1,08E-02-1,44E-02 | <i>Kat6a, Cit</i>              |
| Cellular Function and Maintenance          | 2          | 3,09E-02-3,56E-02 | <i>Nf1, Cit</i>                |
