# Supplementary material
Source: publisher figshare collection journal article supplement (https://karger.figshare.com/articles/dataset/_/5123515)
Supplement: Supplementary file 11 [file 1]

**Supplemental table 1: Primers used for real-time RT-PCR validation**

| Gene ID | NCBI accession number | Forward (5'-3')       | Reverse (5'-3')             | Annealing temperature (°C) | Amplicon length (bp) |
|---------|-----------------------|-----------------------|-----------------------------|----------------------------|----------------------|
| Aatk    | NM_001168703.1        | GGGCCCCGATACTCTGCTCTC | CAGGGCCAAAGTTGGGTTTCG       | 60                         | 115                  |
| Aif1    | NM_017196.3           | CCACCTAAGGCCACCAGCGT  | AGTGCTTGTTGATCCCATCCAACC    | 60                         | 121                  |
| C1qa    | NM_001008515.1        | CGGAGGCAGGAACATCATGGA | AATTCCTGCAACCCCGTCCT        | 58                         | 130                  |
| C4b     | NM_031504.3           | TCAGGGTTACAGCCTCCGAA  | TGGTTTGTCTGCACAGCCTCTA      | 58                         | 111                  |
| Cd74    | NM_013069.2           | CAAACCTGTGAGCCCCGATGC | ACGGGTCCAGACTTCGTAAGC       | 60                         | 153                  |
| Dnajb1  | NM_001108441.1        | CCAAGGAAGGGGACCAGACC  | CCACAGAGAGCCTCCCGAAG        | 60                         | 139                  |
| Fos     | NM_022197.2           | AGTAGAGCAGCTATCTCCTG  | GGGCTGCCAAAATAAACTCC        | 56                         | 215                  |
| Gapdh   | NM_017008.3           | AGGGCTGCCTTCTCTTGAC   | TGGGTAGAATCATACTGGAACATGTAG | 58                         | 101                  |
| Ghrhr   | NM_012850             | CTGCTGTCTTCCAGGGTGAT  | TAGGAGATGTGGAGGCCAAC        | 58                         | 159                  |
| Glr1    | NM_022278.1           | TCCTCAGTCAACTGCCTTTC  | TCCGCCTATGCAGTCTTTAC        | 58                         | 152                  |
| Gpx2    | NM_183403.2           | TCGACATCAGGAGAACTGT   | GTAGGGCAGCTTGCTTTCA         | 60                         | 164                  |
| HLA-dra | NM_001008847.2        | GCGGAAGCACTGGGAGTTTG  | CGACGACGATGCCTACCAGA        | 58                         | 104                  |
| Hspb7   | NM_031607.1           | ATCTCAGCCTAGGCCCCAGT  | ATGTTGCTCCCCAAGTGGCT        | 60                         | 167                  |
| Igfbp3  | NM_012588.1           | CGTCTCCTGGAAACCACT    | AGTTCTGGGTGTCTGTGC          | 60                         | 204                  |
| Jun     | NM_021835.3           | ATCGACATGGAGTCTCAGGA  | GTTTAAGCTGTGCCACCTGT        | 58                         | 196                  |
| Nol3    | NM_053516.2           | GGAACACTGCGCTGTGCCC   | GCCCAGGACATGTGGTCCCT        | 60                         | 158                  |
| Nupr1   | NM_053611.1           | TATGTCGTCGGTGGAGGTCG  | TCCATTGCTGGGTGTGGTGT        | 60                         | 188                  |
| Reg3b   | S77413                | TCCTGCCTGATGCTCTTATC  | GCCAGTTCTGCATCAAACCA        | 58                         | 155                  |
| Sstr3   | NM_133522.1           | TCTCTGGGTACCTGGTGGT   | AGACGACACATGAGAGAGCC        | 60                         | 212                  |
| Tradd   | NM_001100480.1        | AGCTCATAGTGAACCGGCCA  | ATCCCTCAGTGCTCGACAGC        | 58                         | 119                  |
| Xpa     | NM_001106656.1        | TTCATGAACCAGGGCCCGTCA | AGCATCTCTGCAGCTATCGCATG     | 58                         | 125                  |
