# Supplementary material
Source: publisher figshare collection journal article supplement (https://karger.figshare.com/articles/dataset/_/5123515)
Supplement: Supplementary file 12 [file 1]

**Supplemental table 4: List of canonical pathways significantly represented by genes regulated with aging**

**A- Anterior Pituitary**

| <b>Ingenuity Canonical Pathways</b>               | <b>-log(p-value)</b> | <b>Ratio</b> | <b>Genes</b>                                                                                                                                           |
|---------------------------------------------------|----------------------|--------------|--------------------------------------------------------------------------------------------------------------------------------------------------------|
| Complement System                                 | 2,48                 | 0,188        | <i>C1qc, Serping1, C4b, C1qb, C1qa, Cfb</i>                                                                                                            |
| Antigen Presentation Pathway                      | 2,30                 | 0,179        | <i>Hla-Drb1, Cd74, Hla-Dqa1, Hla-Dra, Tapbp</i>                                                                                                        |
| Chemokine Signaling                               | 2,85                 | 0,147        | <i>Ccl11, Camk1g, Fos, Jun, Camk2b, Camk1, Ccl13, Camk2d, Calm1, Plcg2</i>                                                                             |
| Glutathione Metabolism                            | 2,12                 | 0,137        | <i>Gpx4, Glrx, Gpx2, Gstm5, Ggct, Gstm1, Gstm2</i>                                                                                                     |
| Growth Hormone Signaling                          | 2,59                 | 0,134        | <i>Prkcz, Igf1, Igf2, Fos, Prkcg, Slc2a4, Rps6ka1, Plcg2, Igfbp3</i>                                                                                   |
| Melatonin Signaling                               | 2,40                 | 0,132        | <i>Prkcz, Camk2b, Map2k3, Map2k6, Prkcg, Camk2d, Calm1, Plch2, Plcg2</i>                                                                               |
| Glioma Signaling                                  | 3,02                 | 0,122        | <i>Prkcz, Camk1g, Igf1, Igf2, Camk2b, Camk1, Ccnd1, Prkcg, Camk2d, Calm1, Cdkn2c, Plcg2</i>                                                            |
| Neuropathic Pain Signaling In Dorsal Horn Neurons | 2,55                 | 0,118        | <i>Prkcz, Kcnq2, Camk1g, Fos, Camk2b, Camk1, Gria4, Prkcg, Camk2d, Plch2, Ntrk2, Plcg2</i>                                                             |
| B Cell Development                                | 1,52                 | 0,115        | <i>Hla-Drb1, Hla-Dqa1, Hla-Dra</i>                                                                                                                     |
| Calcium-induced T Lymphocyte Apoptosis            | 1,42                 | 0,107        | <i>Prkcz, Hla-Drb1, Prkcg, Calm1, Hla-Dqa1, Hla-Dra</i>                                                                                                |
| Aryl Hydrocarbon Receptor Signaling               | 2,49                 | 0,102        | <i>Aldh18a1, Gstm5, Hspb7, Aldh1a2, Ccnd1, Ccnd2, Aldh16a1, Pola1, Gstm1, Aldh112, Aip, Fos, Jun, Nfix</i>                                             |
| Glycerolipid Metabolism                           | 1,70                 | 0,099        | <i>Ppap2c, Pnpla2, Aldh1a2, Ppapdc1b, Dgka, Adh5, Dgkb, Dgkz, Ppap2b</i>                                                                               |
| Phospholipid Degradation                          | 1,77                 | 0,099        | <i>Ppap2c, Ppapdc1b, Dgka, Dgkb, Plch2, Dgkz, Plcg2, Ppap2b</i>                                                                                        |
| Cdc42 Signaling                                   | 2,41                 | 0,092        | <i>Prkcz, Apc2, Myl9, Fos, Jun, Hla-Drb1, Cdc42bpa, Exoc7, Hla-Dqa1, Diaph1, Hla-Dra, Exoc2</i>                                                        |
| 14-3-3-mediated Signaling                         | 1,57                 | 0,090        | <i>Prkcz, Tubb3, Fos, Jun, Tubb6, Prkcg, Rps6ka1, Plch2, Plcg2, Snca</i>                                                                               |
| Glycerophospholipid Metabolism                    | 1,55                 | 0,084        | <i>Chka, Ppap2c, Ppapdc1b, Dgka, Dgkb, Plch2, Dgkz, Plcg2, Chpt1, Ppap2b</i>                                                                           |
| p38 MAPK Signaling                                | 1,30                 | 0,081        | <i>Tradd, Hspb7, Mapkapk3, H3f3c, Map2k3, Map2k6, Eef2k, Mapkapk5</i>                                                                                  |
| PKCθ Signaling in T Lymphocytes                   | 1,41                 | 0,074        | <i>Fos, Jun, Hla-Drb1, Camk2b, Prkcg, Camk2d, Hla-Dqa1, Plcg2, Hla-Dra</i>                                                                             |
| Xenobiotic Metabolism Signaling                   | 1,90                 | 0,074        | <i>Aldh18a1, Ces1c, Abcc3, Gstm5, Aldh1a2, Camk2b, Map2k6, Aldh16a1, Camk2d, Ppm1j, Gstm1, Prkcz, Aldh112, Aip, Camk1g, Camk1, Map2k3, Prkcg, Fmo5</i> |

**B- Hypothalamus**

| <b>Ingenuity Canonical Pathways</b>                 | <b>-log(p-value)</b> | <b>Ratio</b> | <b>Molecules</b>                                                                |
|-----------------------------------------------------|----------------------|--------------|---------------------------------------------------------------------------------|
| Complement System                                   | 7,01                 | 0,22         | <i>C1QC, CFH, C3, C4B, C2, C1QB, C1QA</i>                                       |
| Antigen Presentation Pathway                        | 4,98                 | 0,18         | <i>B2m, Hla-C, Psmb9, Psmb8, Tap2</i>                                           |
| Lipid Antigen Presentation by CD1                   | 2,06                 | 0,15         | <i>Fcer1g, B2m</i>                                                              |
| Interferon Signaling                                | 3,46                 | 0,14         | <i>Irf9, Stat1, Psmb8, Ifit3</i>                                                |
| Primary Immunodeficiency Signaling                  | 3,46                 | 0,10         | <i>Cd4, Ptprc, Tap2, Blnk</i>                                                   |
| Role of JAK1, JAK2 and TYK2 in Interferon Signaling | 1,59                 | 0,09         | <i>Ptpn6, Stat1</i>                                                             |
| Natural Killer Cell Signaling                       | 4,13                 | 0,08         | <i>Fcer1g, Ptpn6, Rras2, Tyrobp, Fcgr3a, Fcgr2a, Rac2</i>                       |
| Dendritic Cell Maturation                           | 5,76                 | 0,07         | <i>Fcer1g, Fcgr2b, B2m, Hla-C, Stat1, Tyrobp, Icam1, Col1a1, Fcgr3a, Fcgr2a</i> |
| Linoleic Acid Metabolism                            | 3,08                 | 0,07         | <i>Cyp51a1, Fads1, Cyp2d6, Cyp4f8, Fads2</i>                                    |

|                                                                              |      |      |                                                            |
|------------------------------------------------------------------------------|------|------|------------------------------------------------------------|
| Role of Pattern Recognition Receptors in Recognition of Bacteria and Viruses | 3,11 | 0,07 | <i>C1qc,C3,C1qb,Clec7a,C1qa</i>                            |
| OX40 Signaling Pathway                                                       | 2,69 | 0,07 | <i>Fcer1g,B2m,Hla-C,Cd4</i>                                |
| Allograft Rejection Signaling                                                | 2,11 | 0,06 | <i>Fcer1g,B2m,Hla-C</i>                                    |
| Autoimmune Thyroid Disease Signaling                                         | 1,31 | 0,06 | <i>Fcer1g,Hla-C</i>                                        |
| Communication between Innate and Adaptive Immune Cells                       | 2,44 | 0,06 | <i>Fcer1g,B2m,Hla-C,Cd4</i>                                |
| TREM1 Signaling                                                              | 1,93 | 0,06 | <i>Fcgr2b,Tyrobp,Icam1</i>                                 |
| FcγRIIB Signaling in B Lymphocytes                                           | 1,93 | 0,06 | <i>Fcgr2b,Rras2,Blnk</i>                                   |
| Cytotoxic T Lymphocyte-mediated Apoptosis of Target Cells                    | 1,93 | 0,06 | <i>Fcer1g,B2m,Hla-C</i>                                    |
| Activation of IRF by Cytosolic Pattern Recognition Receptors                 | 1,62 | 0,06 | <i>Irf9,Stat1,Ilt2</i>                                     |
| Caveolar-mediated Endocytosis Signaling                                      | 2,12 | 0,06 | <i>Cd48,B2m,Hla-C,Alb</i>                                  |
| Glioma Invasiveness Signaling                                                | 1,60 | 0,06 | <i>F2r,Rras2,Timp4</i>                                     |
| Glutamate Receptor Signaling                                                 | 1,49 | 0,05 | <i>Slc1a2,Grm2,Slc1a6</i>                                  |
| B Cell Receptor Signaling                                                    | 2,98 | 0,05 | <i>Ptpn6,Fcgr2b,Rras2,Ptpnc,Fcgr2a,Rac2,Blnk</i>           |
| JAK/Stat Signaling                                                           | 1,44 | 0,05 | <i>Ptpn6,Rras2,Stat1</i>                                   |
| GM-CSF Signaling                                                             | 1,42 | 0,05 | <i>Rras2,Stat1,Hck</i>                                     |
| Virus Entry via Endocytic Pathways                                           | 1,78 | 0,05 | <i>Rras2,B2m,Hla-C,Rac2</i>                                |
| Systemic Lupus Erythematosus Signaling                                       | 3,47 | 0,05 | <i>Fcer1g,Ptpn6,Fcgr2b,Rras2,Hla-C,Ptpnc,Fcgr3a,Fcgr2a</i> |
| Role of JAK1 and JAK3 in γc Cytokine Signaling                               | 1,51 | 0,05 | <i>Rras2,Stat1,Blnk</i>                                    |
| Antiproliferative Role of Somatostatin Receptor 2                            | 1,42 | 0,05 | <i>Ptpn6,Rras2,Sst</i>                                     |
| Fcγ Receptor-mediated Phagocytosis in Macrophages and Monocytes              | 1,65 | 0,05 | <i>Fcgr3a,Fcgr2a,Hck,Rac2</i>                              |
| Growth Hormone Signaling                                                     | 1,37 | 0,04 | <i>Ptpn6,Stat1,Igf1bp3</i>                                 |
| LXR/RXR Activation                                                           | 2,04 | 0,04 | <i>C3,C4B (Includes Others),HMGCR,ALB,SCD</i>              |
| Acute Phase Response Signaling                                               | 2,46 | 0,04 | <i>Rras2,Cp,C3,Serpina3,C4b,Alb</i>                        |
| Role of NFAT in Regulation of the Immune Response                            | 2,61 | 0,04 | <i>Fcer1g,Fcgr2b,Rras2,Cd4,Fcgr3a,Fcgr2a,Blnk</i>          |
| Metabolism of Xenobiotics by Cytochrome P450                                 | 1,64 | 0,04 | <i>Cyp51a1,Cyp2d6,Cyp4f8,Gsta1</i>                         |
| PI3K Signaling in B Lymphocytes                                              | 1,77 | 0,04 | <i>Fcgr2b,Rras2,C3,Ptpnc,Blnk</i>                          |
| Hepatic Fibrosis / Hepatic Stellate Cell Activation                          | 1,64 | 0,04 | <i>Ednrb,Stat1,Icam1,Col1a1,Igf1bp3</i>                    |
| CD28 Signaling in T Helper Cells                                             | 1,48 | 0,04 | <i>Fcer1g,Ptpn6,Cd4,Ptpnc</i>                              |
| Germ Cell-Sertoli Cell Junction Signaling                                    | 1,56 | 0,03 | <i>Milt4,Rras2,Iqgap1,Pls1,Rac2</i>                        |
| PKCθ Signaling in T Lymphocytes                                              | 1,49 | 0,03 | <i>Fcer1g,Rras2,Cd4,Rac2</i>                               |
| Wnt/β-catenin Signaling                                                      | 1,40 | 0,03 | <i>Fzd2,Gja1,Sox4,Wnt4,Nlk</i>                             |
| Cdc42 Signaling                                                              | 1,38 | 0,03 | <i>Fcer1g,B2m,Hla-C,Iqgap1</i>                             |
| Protein Ubiquitination Pathway                                               | 1,63 | 0,03 | <i>Hspb1,B2m,Hla-C,Psmb9,Psmb8,Ube2l6,Tap2</i>             |
| ERK/MAPK Signaling                                                           | 1,30 | 0,03 | <i>Hspb1,Rras2,Stat1,Dusp6,Rac2</i>                        |
